# Supplementary material for: Catalyst-controlled regioselective Sonogashira coupling of 9-substituted-6-chloro-2,8-diiodopurines
Source: Royal Society of Chemistry journal article supplement (doi:10.1039/d2qo00823h), 2022-01-01

## Supporting Information

### Catalyst-controlled Regioselective Sonogashira Coupling of 9-Substituted-6-chloro-2,8-diiodopurines

Gibae Kim,<sup>a</sup> Grim Lee,<sup>a</sup> Gyudong Kim,<sup>b</sup> Yeonseong Seo,<sup>a</sup> Dnyandev B. Jarhad,<sup>\*a</sup> and  
Lak Shin Jeong<sup>\*a</sup>

<sup>a</sup>*Research Institute of Pharmaceutical Sciences, College of Pharmacy, Seoul National University, Seoul, 08826, Korea*

<sup>b</sup>*College of Pharmacy and Research Institute of Drug Development, Chonnam National University, Gwangju 61186, Korea*

#### Table of Contents

|                                                                                            |         |
|--------------------------------------------------------------------------------------------|---------|
| 1. The chemical structures of ligands and their abbreviations.....                         | S2      |
| 2. Table S1. Solvent screening of regioselective Sonogashira coupling reaction .....       | S3-S4   |
| 3. Scheme S1. Investigation of the effect of mixed ligand for selectivity .....            | S4      |
| 4. Single-Crystal X-ray crystallography data of compounds of <b>3a</b> and <b>4a</b> ..... | S5-S8   |
| 5. Computational details .....                                                             | S9-S16  |
| 6. Experimental Section .....                                                              | S17-S32 |
| 7. References.....                                                                         | S32-S33 |
| 8. <sup>1</sup> H NMR, <sup>13</sup> C NMR, and 2D NMR spectra.....                        | S34-S99 |

**Fig. S1. The chemical structures ligands and their abbreviations**

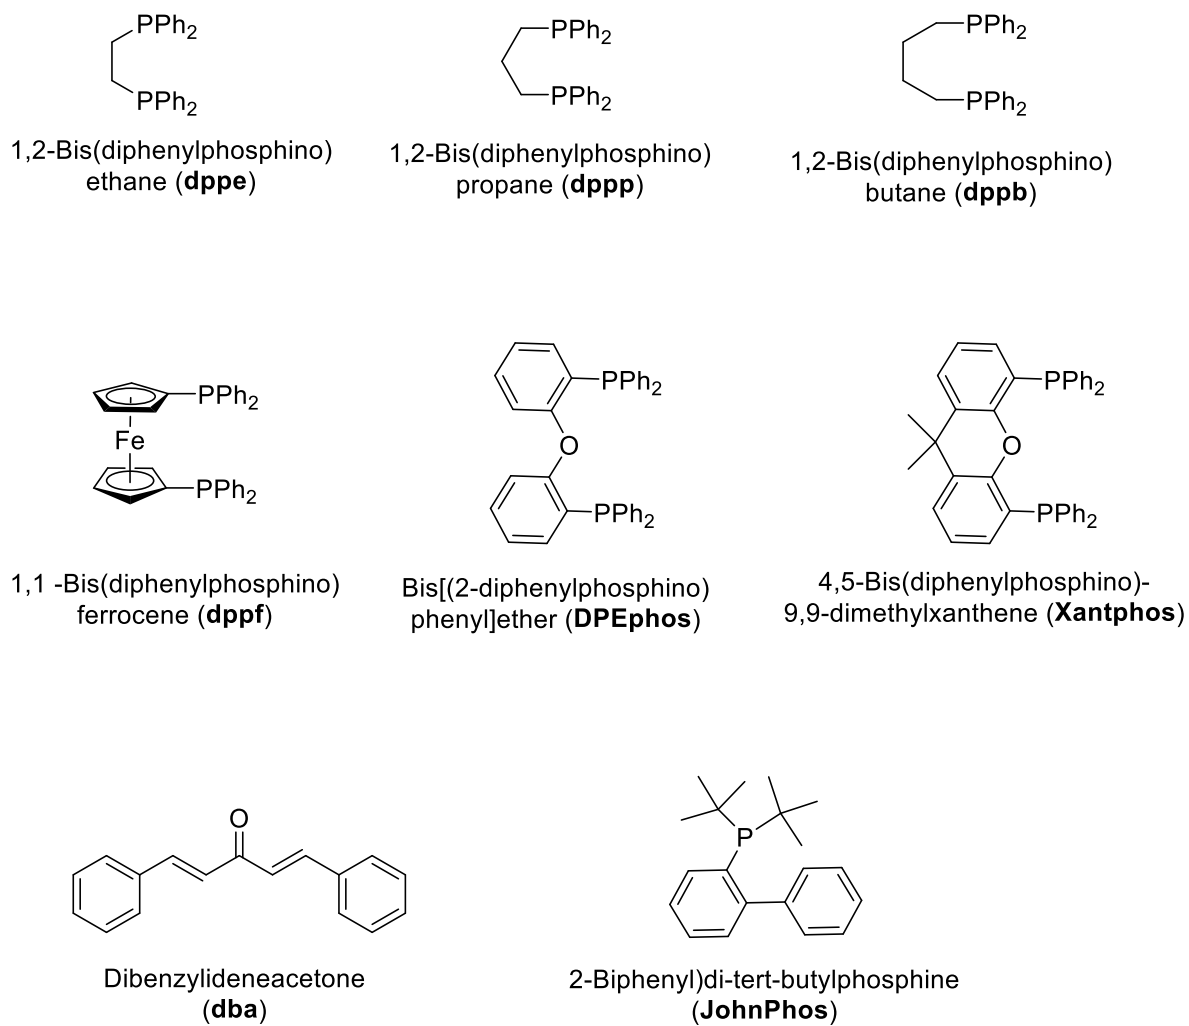

**Table S1. Solvent Screening of regioselective Sonogashira coupling reaction<sup>a</sup>**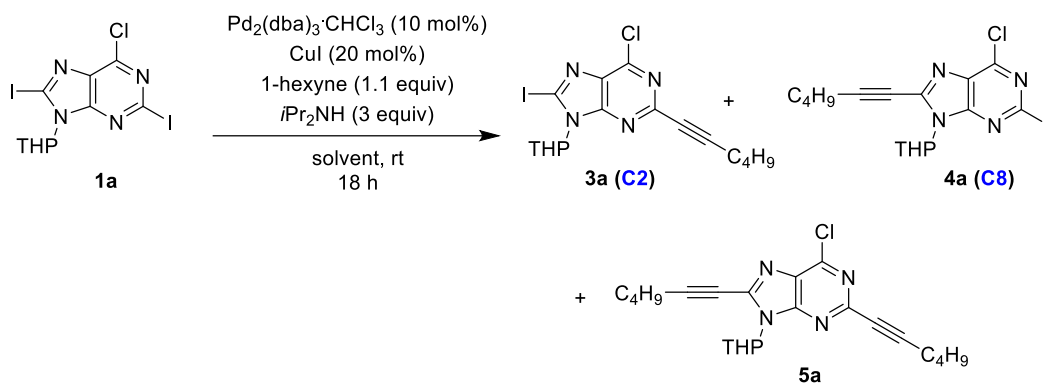

| entry          | solvent           | yield (%) <sup>b</sup> |           |           |
|----------------|-------------------|------------------------|-----------|-----------|
|                |                   | <b>3a</b>              | <b>4a</b> | <b>5a</b> |
| 1              | DMF               | 4                      | 69        | 9         |
| 2              | Toluene           | 7                      | 42        | 15        |
| 3              | dichloromethane   | 11                     | 38        | 13        |
| 4              | THF               | 3                      | 49        | 11        |
| 5              | 1,4-dioxane       | 3                      | 49        | 5         |
| 6 <sup>c</sup> | Acetonitrile      | trace                  | 20        | 9         |
| 7              | DMF/Toluene (1:1) | trace                  | 59        | 9         |

<sup>a</sup>Unless otherwise noted, all the reactions were performed with **1a** (0.2 mmol, 1 equiv),  $\text{CuI}$  (0.04 mmol, 0.2 equiv),  $\text{Pd}_2(\text{dba})_3 \cdot \text{CHCl}_3$  (0.02 mmol, 0.1 equiv), 1-hexyne (0.22 mmol, 1.1 equiv), and  $i\text{Pr}_2\text{NH}$  (0.6 mmol, 3 equiv) in 5.0 mL of solvent for 18 h under nitrogen atmosphere. <sup>b</sup>Isolated yield after silica gel column chromatography. <sup>c</sup>45% of **1a** was recovered.

In an attempt to improve the yield of the reaction, we briefly investigated the effect of solvent on the Sonogashira cross-coupling of **1a** with 1-hexyne. Examination of solvent effects revealed that aprotic polar solvents such as DMF, dioxane, and THF showed good results (Table S1). Among them, the use of DMF solvent showed an enhancement in the yield of the reaction as well as the regioisomeric ratio (entry 1). The use of non-polar solvents toluene and dichloromethane resulted in a greatly diminished yield of C8-alkynylated product **4a** to 42 and 38%, respectively, and also regioisomeric ratio was decreased (entries 2 and 3). When the reaction was performed in a polar solvent such as THF and 1,4-dioxane, the yield of C8-alkynylated product was increased in comparison to non-polar solvents, and only a trace amount of the C2-alkynylated product was observed (entries 4 and 5). The use of acetonitrile gave a low yield of **4a**, but 45% of **1a** was recovered (entry 6). It implies acetonitrile made the

reaction sluggish. When a mixture of DMF and toluene (1:1) was used as solvent, no improvement in the yield of **4a** was observed (entry 7).

### Scheme S1. Investigation of the effect of the mixed ligands for selectivity

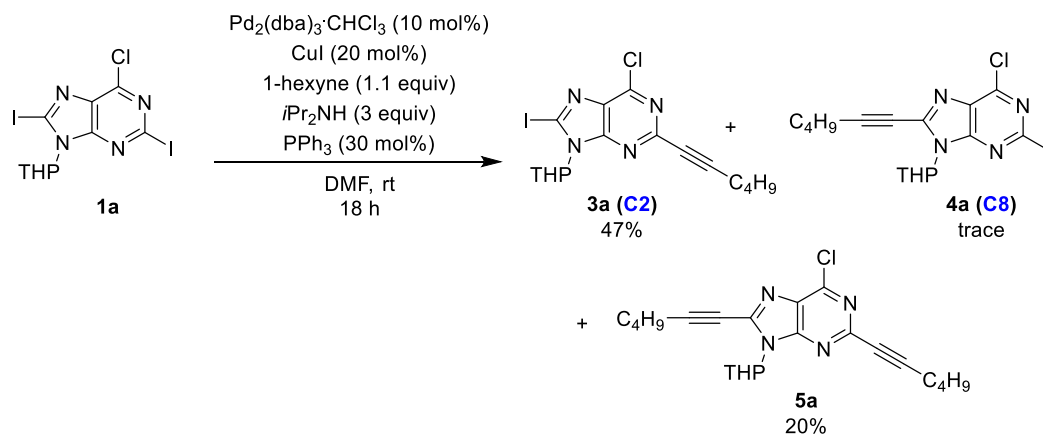

To investigate how does mixed ligand affect the regioselectivity, we also performed experiment of the Sonogashira reaction of **1a** with 1-hexyne using  $\text{Pd}_2(\text{dba})_3 \cdot \text{CHCl}_3$ - $\text{PPh}_3$  combination to explore the selectivity. Under this condition, C2-selective coupling product (**3a**) was obtained in 47% of isolated yield without being formation of C8-coupling product (**4a**). It demonstrated that Pd catalyst enters catalytic cycle as  $\text{Pd}(\text{PPh}_3)_2$  species. Although  $\text{Pd}(\text{dba})(\text{PPh}_3)_2$  was preliminarily formed as resting state, it was converted to  $\text{Pd}(\text{PPh}_3)_n$  as active species.<sup>[1]</sup>



**Table S2. Crystal data and structure refinement for 3a**

|                                             |                                                               |
|---------------------------------------------|---------------------------------------------------------------|
| Empirical formula                           | C <sub>16</sub> H <sub>18</sub> ClIN <sub>4</sub> O           |
| Formula weight                              | 443.68                                                        |
| Temperature/K                               | 294.1(2)                                                      |
| Crystal system                              | monoclinic                                                    |
| Space group                                 | P2 <sub>1</sub> /n                                            |
| a/Å                                         | 10.3449(9)                                                    |
| b/Å                                         | 15.2749(15)                                                   |
| c/Å                                         | 11.5805(13)                                                   |
| α/°                                         | 90                                                            |
| β/°                                         | 98.234(10)                                                    |
| γ/°                                         | 90                                                            |
| Volume/Å <sup>3</sup>                       | 1811.1(3)                                                     |
| Z                                           | 4                                                             |
| ρ <sub>calc</sub> /cm <sup>3</sup>          | 1.627                                                         |
| μ/mm <sup>-1</sup>                          | 1.925                                                         |
| F(000)                                      | 876.0                                                         |
| Crystal size/mm <sup>3</sup>                | 0.5 × 0.3 × 0.1                                               |
| Radiation                                   | MoKα (λ = 0.71073)                                            |
| 2Θ range for data collection/°              | 4.444 to 59.278                                               |
| Index ranges                                | -12 ≤ h ≤ 14, -16 ≤ k ≤ 20, -12 ≤ l ≤ 14                      |
| Reflections collected                       | 8344                                                          |
| Independent reflections                     | 4171 [R <sub>int</sub> = 0.0644, R <sub>sigma</sub> = 0.0744] |
| Data/restraints/parameters                  | 4171/0/210                                                    |
| Goodness-of-fit on F <sup>2</sup>           | 1.032                                                         |
| Final R indexes [I ≥ 2σ (I)]                | R <sub>1</sub> = 0.0726, wR <sub>2</sub> = 0.1998             |
| Final R indexes [all data]                  | R <sub>1</sub> = 0.1110, wR <sub>2</sub> = 0.2446             |
| Largest diff. peak/hole / e Å <sup>-3</sup> | 1.03/-0.85                                                    |

## 2.2 Single-Crystal X-ray crystallography data of compound 4a

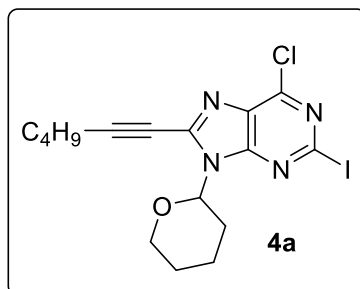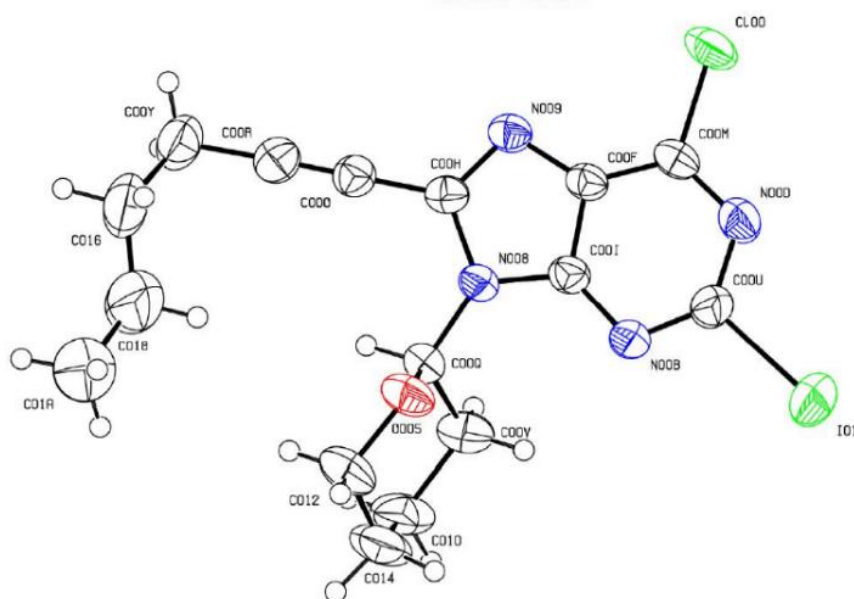

CCDC No: 2164194

**Fig S3.** ORTEP diagram of compound 4a showing thermal ellipsoid at 50% probability.

**Table S3. Crystal data and structure refinement for 4a**

|                                             |                                                               |
|---------------------------------------------|---------------------------------------------------------------|
| Empirical formula                           | C <sub>16</sub> H <sub>18</sub> ClIN <sub>4</sub> O           |
| Formula weight                              | 444.69                                                        |
| Temperature/K                               | 291.7(6)                                                      |
| Crystal system                              | monoclinic                                                    |
| Space group                                 | P2 <sub>1</sub> /c                                            |
| a/Å                                         | 11.7366(6)                                                    |
| b/Å                                         | 17.1589(6)                                                    |
| c/Å                                         | 9.5008(6)                                                     |
| α/°                                         | 90                                                            |
| β/°                                         | 108.684(6)                                                    |
| γ/°                                         | 90                                                            |
| Volume/Å <sup>3</sup>                       | 1812.51(17)                                                   |
| Z                                           | 4                                                             |
| ρ <sub>calc</sub> /cm <sup>3</sup>          | 1.630                                                         |
| μ/mm <sup>-1</sup>                          | 1.923                                                         |
| F(000)                                      | 880.0                                                         |
| Crystal size/mm <sup>3</sup>                | 0.325 × 0.268 × 0.162                                         |
| Radiation                                   | MoKα (λ = 0.71073)                                            |
| 2θ range for data collection/°              | 4.366 to 59.382                                               |
| Index ranges                                | -14 ≤ h ≤ 15, -23 ≤ k ≤ 22, -13 ≤ l ≤ 11                      |
| Reflections collected                       | 16669                                                         |
| Independent reflections                     | 4552 [R <sub>int</sub> = 0.0326, R <sub>sigma</sub> = 0.0331] |
| Data/restraints/parameters                  | 4552/0/209                                                    |
| Goodness-of-fit on F <sup>2</sup>           | 1.049                                                         |
| Final R indexes [I ≥ 2σ (I)]                | R <sub>1</sub> = 0.0579, wR <sub>2</sub> = 0.1218             |
| Final R indexes [all data]                  | R <sub>1</sub> = 0.0842, wR <sub>2</sub> = 0.1348             |
| Largest diff. peak/hole / e Å <sup>-3</sup> | 1.12/-0.84                                                    |



## Computational details

The B3LYP density functional method<sup>[5]</sup> was used for the geometry optimization, natural bond orbital (NBO) analysis in implicit solvent using the conductor-like polarizable continuum model (CPCM)<sup>[6]</sup> to consider the effect of toluene. The vibrational frequency analysis was performed to calculate the zero-point energy and thermal correction at 298.15 K, 1 atm. The basis sets of 6-31+G(d)<sup>[7]</sup> and Lanl2dz<sup>[8]</sup> (Pd, I) were employed depending on the substrate and analysis. The bonding dissociation energy was calculated by sum of enthalpy for cleaved molecules and substrate **1a**. All of these calculations were carried out by Gaussian 09.<sup>[9]</sup>

## Cartesian Coordinates and Energies

### 1a

|    | Center<br>Number | Atomic<br>Number | Atomic<br>Type |           |           |
|----|------------------|------------------|----------------|-----------|-----------|
| 1  | 7                | 0                | 2.641960       | -1.440055 | 0.017372  |
| 2  | 6                | 0                | 2.580792       | -0.172890 | -0.021335 |
| 3  | 7                | 0                | 1.500970       | 0.491414  | -0.052565 |
| 4  | 6                | 0                | 0.413810       | -0.149309 | -0.045187 |
| 5  | 6                | 0                | 0.405494       | -1.490864 | -0.005164 |
| 6  | 6                | 0                | 1.581592       | -2.133687 | 0.027343  |
| 7  | 7                | 0                | -0.820399      | 0.130293  | -0.066402 |
| 8  | 6                | 0                | -1.544600      | -0.910309 | -0.041041 |
| 9  | 7                | 0                | -0.784030      | -1.924534 | -0.000988 |
| 10 | 17               | 0                | 1.656960       | -3.858293 | 0.080661  |
| 11 | 53               | 0                | 4.440785       | 0.933358  | -0.031983 |
| 12 | 53               | 0                | -3.685634      | -1.115994 | 0.012320  |
| 13 | 6                | 0                | -1.296825      | 1.527678  | -0.123822 |
| 14 | 8                | 0                | -2.310189      | 1.707101  | -1.090258 |
| 15 | 6                | 0                | -2.688919      | 3.051395  | -1.244934 |
| 16 | 6                | 0                | -3.253619      | 3.606320  | 0.059655  |
| 17 | 6                | 0                | -2.211948      | 3.477832  | 1.176549  |
| 18 | 6                | 0                | -1.747078      | 2.018791  | 1.253339  |
| 19 | 1                | 0                | -0.433539      | 2.157882  | -0.449833 |
| 20 | 1                | 0                | -3.466324      | 3.085633  | -2.043446 |
| 21 | 1                | 0                | -1.817422      | 3.646639  | -1.600753 |
| 22 | 1                | 0                | -3.546730      | 4.675028  | -0.071561 |
| 23 | 1                | 0                | -4.174567      | 3.040378  | 0.338682  |
| 24 | 1                | 0                | -2.639430      | 3.806552  | 2.153311  |
| 25 | 1                | 0                | -1.340677      | 4.138966  | 0.953944  |
| 26 | 1                | 0                | -2.583011      | 1.387510  | 1.633028  |

|                                              |   |   |           |                             |          |
|----------------------------------------------|---|---|-----------|-----------------------------|----------|
| 27                                           | 1 | 0 | -0.909740 | 1.925702                    | 1.985242 |
| Zero-point correction=                       |   |   |           | 0.190229 (Hartree/Particle) |          |
| Thermal correction to Energy=                |   |   |           | 0.206410                    |          |
| Thermal correction to Enthalpy=              |   |   |           | 0.207354                    |          |
| Thermal correction to Gibbs Free Energy=     |   |   |           | 0.142104                    |          |
| Sum of electronic and zero-point Energies=   |   |   |           | -1163.488250                |          |
| Sum of electronic and thermal Energies=      |   |   |           | -1163.472068                |          |
| Sum of electronic and thermal Enthalpies=    |   |   |           | -1163.471124                |          |
| Sum of electronic and thermal Free Energies= |   |   |           | -1163.536374                |          |

**C8-I fragment (fragment of purine)**

|    | Center<br>Number | Atomic<br>Number | Atomic<br>Type |           |           |  |
|----|------------------|------------------|----------------|-----------|-----------|--|
| 1  | 7                | 0                | 2.211823       | 1.045746  | 0.061577  |  |
| 2  | 6                | 0                | 1.613107       | -0.143016 | -0.035524 |  |
| 3  | 7                | 0                | 0.312340       | -0.403669 | -0.123697 |  |
| 4  | 6                | 0                | -0.425329      | 0.701354  | -0.105806 |  |
| 5  | 6                | 0                | 0.063394       | 2.025771  | -0.008744 |  |
| 6  | 6                | 0                | 1.448687       | 2.134917  | 0.074489  |  |
| 7  | 7                | 0                | -1.807925      | 0.819213  | -0.194534 |  |
| 8  | 6                | 0                | -2.032511      | 2.173133  | -0.122092 |  |
| 9  | 7                | 0                | -1.004556      | 2.923004  | -0.024502 |  |
| 10 | 17               | 0                | 2.230971       | 3.680380  | 0.196814  |  |
| 11 | 53               | 0                | 2.912636       | -1.833671 | -0.053582 |  |
| 12 | 6                | 0                | -2.785943      | -0.257562 | -0.207438 |  |
| 13 | 8                | 0                | -3.228683      | -0.417948 | 1.132374  |  |
| 14 | 6                | 0                | -4.154382      | -1.510660 | 1.276104  |  |
| 15 | 6                | 0                | -5.399976      | -1.299329 | 0.417143  |  |
| 16 | 6                | 0                | -5.003315      | -1.075190 | -1.050239 |  |
| 17 | 6                | 0                | -3.946342      | 0.036986  | -1.159816 |  |
| 18 | 1                | 0                | -2.240528      | -1.156951 | -0.525986 |  |
| 19 | 1                | 0                | -4.390513      | -1.545319 | 2.342287  |  |
| 20 | 1                | 0                | -3.645454      | -2.449193 | 1.003232  |  |
| 21 | 1                | 0                | -6.059631      | -2.171007 | 0.513008  |  |
| 22 | 1                | 0                | -5.951269      | -0.427731 | 0.794226  |  |
| 23 | 1                | 0                | -5.879461      | -0.815464 | -1.655151 |  |
| 24 | 1                | 0                | -4.595623      | -2.007181 | -1.467820 |  |
| 25 | 1                | 0                | -4.386410      | 1.005149  | -0.885304 |  |
| 26 | 1                | 0                | -3.563954      | 0.120883  | -2.183844 |  |

|                                          |                             |
|------------------------------------------|-----------------------------|
| Zero-point correction=                   | 0.188181 (Hartree/Particle) |
| Thermal correction to Energy=            | 0.202623                    |
| Thermal correction to Enthalpy=          | 0.203567                    |
| Thermal correction to Gibbs Free Energy= | 0.142167                    |

|                                              |              |
|----------------------------------------------|--------------|
| Sum of electronic and zero-point Energies=   | -1152.028524 |
| Sum of electronic and thermal Energies=      | -1152.014082 |
| Sum of electronic and thermal Enthalpies=    | -1152.013138 |
| Sum of electronic and thermal Free Energies= | -1152.074538 |

**C2-I fragment (fragment of purine)**

|                                              | Center<br>Number | Atomic<br>Number | Atomic<br>Type |                             |           |
|----------------------------------------------|------------------|------------------|----------------|-----------------------------|-----------|
| 1                                            | 7                | 0                | 3.806459       | 1.656455                    | -0.043029 |
| 2                                            | 6                | 0                | 2.949574       | 2.591469                    | -0.092471 |
| 3                                            | 7                | 0                | 1.694295       | 2.412208                    | -0.113195 |
| 4                                            | 6                | 0                | 1.267391       | 1.225048                    | -0.083173 |
| 5                                            | 6                | 0                | 2.118360       | 0.188451                    | -0.030658 |
| 6                                            | 6                | 0                | 3.433985       | 0.445753                    | -0.010338 |
| 7                                            | 7                | 0                | 0.139195       | 0.651418                    | -0.087959 |
| 8                                            | 6                | 0                | 0.247095       | -0.611197                   | -0.041858 |
| 9                                            | 7                | 0                | 1.480405       | -0.904877                   | -0.004170 |
| 10                                           | 17               | 0                | 4.594141       | -0.831819                   | 0.057712  |
| 11                                           | 53               | 0                | -1.268190      | -2.136096                   | 0.046356  |
| 12                                           | 6                | 0                | -1.120441      | 1.421038                    | -0.150918 |
| 13                                           | 8                | 0                | -2.020371      | 0.895409                    | -1.103251 |
| 14                                           | 6                | 0                | -3.171513      | 1.684947                    | -1.264466 |
| 15                                           | 6                | 0                | -3.952692      | 1.773197                    | 0.043491  |
| 16                                           | 6                | 0                | -3.062633      | 2.358634                    | 1.145352  |
| 17                                           | 6                | 0                | -1.772378      | 1.534532                    | 1.228425  |
| 18                                           | 1                | 0                | -0.860930      | 2.451713                    | -0.495979 |
| 19                                           | 1                | 0                | -3.796170      | 1.201200                    | -2.051195 |
| 20                                           | 1                | 0                | -2.883527      | 2.693471                    | -1.639134 |
| 21                                           | 1                | 0                | -4.861757      | 2.405833                    | -0.093044 |
| 22                                           | 1                | 0                | -4.297896      | 0.754328                    | 0.341871  |
| 23                                           | 1                | 0                | -3.595684      | 2.354977                    | 2.125508  |
| 24                                           | 1                | 0                | -2.816126      | 3.419953                    | 0.903273  |
| 25                                           | 1                | 0                | -2.009839      | 0.521410                    | 1.626743  |
| 26                                           | 1                | 0                | -1.064414      | 2.010165                    | 1.948176  |
| Zero-point correction=                       |                  |                  |                | 0.188733 (Hartree/Particle) |           |
| Thermal correction to Energy=                |                  |                  |                | 0.202999                    |           |
| Thermal correction to Enthalpy=              |                  |                  |                | 0.203943                    |           |
| Thermal correction to Gibbs Free Energy=     |                  |                  |                | 0.144388                    |           |
| Sum of electronic and zero-point Energies=   |                  |                  |                | -1152.031122                |           |
| Sum of electronic and thermal Energies=      |                  |                  |                | -1152.016856                |           |
| Sum of electronic and thermal Enthalpies=    |                  |                  |                | -1152.015912                |           |
| Sum of electronic and thermal Free Energies= |                  |                  |                | -1152.075467                |           |

## Iodine

|                                              |                             |
|----------------------------------------------|-----------------------------|
| Zero-point correction=                       | 0.000000 (Hartree/Particle) |
| Thermal correction to Energy=                | 0.001416                    |
| Thermal correction to Enthalpy=              | 0.002360                    |
| Thermal correction to Gibbs Free Energy=     | -0.017503                   |
| Sum of electronic and zero-point Energies=   | -11.363637                  |
| Sum of electronic and thermal Energies=      | -11.362221                  |
| Sum of electronic and thermal Enthalpies=    | -11.361277                  |
| Sum of electronic and thermal Free Energies= | -11.381140                  |

## Molecular Orbital Coefficients of Substrate(1a), LUMO = 59

|    |                |      | 59       | 60       | 61       | 62       | 63       |
|----|----------------|------|----------|----------|----------|----------|----------|
|    |                |      | O        | O        | O        | O        | O        |
|    | Eigenvalues -- |      | -0.29066 | -0.28658 | -0.27362 | -0.27099 | -0.25943 |
| 1  | 1              | N 1S | 0.00371  | -0.00140 | 0.03079  | -0.02154 | -0.00017 |
| 2  |                | 2S   | -0.00966 | 0.00330  | -0.07024 | 0.04824  | 0.00037  |
| 3  |                | 3S   | -0.00142 | 0.00241  | -0.11299 | 0.07791  | 0.00016  |
| 4  |                | 4PX  | 0.01027  | -0.00912 | 0.17594  | -0.13763 | -0.00086 |
| 5  |                | 4PY  | 0.04281  | -0.00170 | -0.06792 | 0.07532  | 0.00108  |
| 6  |                | 4PZ  | -0.07623 | -0.02729 | 0.02809  | 0.03260  | -0.09753 |
| 7  |                | 5PX  | 0.01212  | -0.00329 | 0.05676  | -0.03413 | 0.00007  |
| 8  |                | 5PY  | 0.02543  | -0.00173 | -0.04113 | 0.05320  | 0.00156  |
| 9  |                | 5PZ  | -0.04071 | -0.01577 | 0.01448  | 0.01731  | -0.04736 |
| 10 | 2              | C 1S | -0.00544 | 0.00085  | -0.00197 | -0.00155 | -0.00006 |
| 11 |                | 2S   | 0.01249  | -0.00163 | 0.00477  | 0.00392  | 0.00010  |
| 12 |                | 3S   | 0.03573  | -0.00669 | 0.01765  | 0.01310  | 0.00171  |
| 13 |                | 4PX  | 0.00904  | 0.00093  | -0.02694 | 0.03077  | 0.00225  |
| 14 |                | 4PY  | -0.02426 | 0.00064  | 0.04504  | -0.04582 | -0.00119 |
| 15 |                | 4PZ  | 0.02962  | 0.04420  | 0.00636  | 0.01217  | -0.21157 |
| 16 |                | 5PX  | -0.02253 | -0.00097 | 0.02441  | -0.02764 | 0.00098  |
| 17 |                | 5PY  | 0.01860  | 0.00002  | -0.02052 | 0.04103  | 0.00178  |
| 18 |                | 5PZ  | 0.01829  | 0.03636  | 0.00128  | 0.00224  | -0.07776 |
| 19 | 3              | N 1S | 0.00771  | -0.00012 | -0.02271 | 0.02605  | 0.00046  |
| 20 |                | 2S   | -0.02054 | 0.00110  | 0.05218  | -0.05941 | -0.00100 |
| 21 |                | 3S   | 0.01868  | -0.00824 | 0.06333  | -0.08183 | -0.00219 |
| 22 |                | 4PX  | 0.01683  | -0.00559 | -0.00352 | 0.00278  | 0.00133  |
| 23 |                | 4PY  | 0.11578  | -0.01163 | -0.16083 | 0.18511  | 0.00273  |
| 24 |                | 4PZ  | 0.02783  | -0.12956 | -0.00756 | -0.00838 | -0.14584 |
| 25 |                | 5PX  | 0.02955  | -0.00627 | 0.02726  | -0.01202 | 0.00077  |
| 26 |                | 5PY  | 0.05472  | -0.00712 | -0.06245 | 0.06859  | 0.00027  |
| 27 |                | 5PZ  | 0.01433  | -0.06814 | -0.00530 | -0.00703 | -0.07542 |

|    |   |   |     |          |          |          |          |          |
|----|---|---|-----|----------|----------|----------|----------|----------|
| 28 | 4 | C | 1S  | 0.00811  | -0.00116 | 0.00989  | -0.00088 | 0.00079  |
| 29 |   |   | 2S  | -0.01179 | 0.00188  | -0.02619 | 0.00397  | -0.00262 |
| 30 |   |   | 3S  | -0.17672 | 0.02490  | -0.07911 | -0.04725 | -0.00509 |
| 31 |   |   | 4PX | -0.02039 | 0.00106  | 0.03191  | -0.06919 | -0.00635 |
| 32 |   |   | 4PY | -0.07734 | 0.01215  | 0.06923  | -0.04561 | 0.00259  |
| 33 |   |   | 4PZ | -0.02979 | -0.08159 | -0.00471 | -0.00734 | 0.19051  |
| 34 |   |   | 5PX | 0.00505  | -0.00737 | -0.00072 | -0.02281 | -0.00123 |
| 35 |   |   | 5PY | 0.03278  | -0.00912 | -0.06422 | -0.00553 | -0.00236 |
| 36 |   |   | 5PZ | -0.01844 | -0.04780 | 0.00387  | 0.00505  | 0.07220  |
| 37 | 5 | C | 1S  | -0.00959 | 0.00125  | 0.00368  | -0.00691 | -0.00016 |
| 38 |   |   | 2S  | 0.02879  | -0.00424 | -0.01189 | 0.01458  | -0.00017 |
| 39 |   |   | 3S  | 0.00181  | 0.00688  | 0.01297  | 0.06915  | 0.00484  |
| 40 |   |   | 4PX | 0.07686  | -0.01455 | 0.03095  | -0.00032 | -0.00102 |
| 41 |   |   | 4PY | 0.09202  | -0.01538 | -0.08577 | 0.07625  | 0.00074  |
| 42 |   |   | 4PZ | 0.02974  | -0.02718 | -0.03222 | -0.04426 | 0.21998  |
| 43 |   |   | 5PX | -0.06959 | 0.00784  | 0.03506  | -0.06000 | -0.00023 |
| 44 |   |   | 5PY | -0.07393 | 0.01053  | -0.05998 | 0.00594  | -0.00114 |
| 45 |   |   | 5PZ | 0.01722  | 0.00551  | -0.01595 | -0.02294 | 0.08813  |
| 46 | 6 | C | 1S  | -0.00532 | 0.00108  | -0.00614 | 0.00585  | 0.00023  |
| 47 |   |   | 2S  | 0.01902  | -0.00329 | 0.01446  | -0.01171 | -0.00072 |
| 48 |   |   | 3S  | -0.01957 | -0.00185 | 0.05685  | -0.08768 | -0.00166 |
| 49 |   |   | 4PX | 0.00249  | 0.00180  | -0.07651 | 0.04587  | -0.00163 |
| 50 |   |   | 4PY | -0.01019 | 0.00231  | -0.03332 | 0.02918  | 0.00086  |
| 51 |   |   | 4PZ | -0.05361 | -0.06475 | -0.00161 | -0.00537 | 0.17362  |
| 52 |   |   | 5PX | 0.02798  | -0.00634 | 0.03402  | -0.01777 | 0.00054  |
| 53 |   |   | 5PY | 0.07690  | -0.00899 | -0.03759 | 0.05718  | 0.00061  |
| 54 |   |   | 5PZ | -0.01921 | -0.03250 | 0.00144  | 0.00018  | 0.05575  |
| 55 | 7 | N | 1S  | 0.00217  | -0.00100 | -0.00283 | -0.00469 | -0.00093 |
| 56 |   |   | 2S  | -0.01015 | 0.00312  | 0.00593  | 0.00923  | 0.00197  |
| 57 |   |   | 3S  | 0.01298  | 0.00022  | 0.02186  | 0.03505  | 0.00664  |
| 58 |   |   | 4PX | -0.01835 | -0.00022 | 0.05084  | -0.00628 | 0.00424  |
| 59 |   |   | 4PY | 0.01552  | -0.01253 | 0.01084  | 0.00086  | 0.00181  |
| 60 |   |   | 4PZ | -0.07282 | 0.12862  | 0.03430  | 0.04064  | 0.02948  |
| 61 |   |   | 5PX | -0.05413 | 0.00347  | 0.01371  | -0.05851 | -0.00146 |
| 62 |   |   | 5PY | 0.06215  | -0.02233 | 0.00126  | 0.00194  | 0.00373  |
| 63 |   |   | 5PZ | -0.03641 | 0.09563  | 0.01576  | 0.01825  | 0.02084  |
| 64 | 8 | C | 1S  | -0.01187 | 0.00085  | 0.00789  | -0.00870 | 0.00043  |
| 65 |   |   | 2S  | 0.02849  | -0.00312 | -0.01975 | 0.02194  | 0.00001  |
| 66 |   |   | 3S  | 0.03585  | 0.01181  | -0.01476 | 0.06137  | -0.00636 |
| 67 |   |   | 4PX | -0.00761 | 0.00246  | 0.01173  | -0.02918 | -0.00264 |
| 68 |   |   | 4PY | 0.02725  | -0.00217 | -0.03630 | 0.00430  | -0.00398 |
| 69 |   |   | 4PZ | 0.01374  | 0.06712  | 0.02424  | 0.03320  | -0.23180 |
| 70 |   |   | 5PX | 0.00587  | -0.01046 | -0.00747 | -0.01560 | 0.00343  |

|     |    |       |          |          |          |          |          |
|-----|----|-------|----------|----------|----------|----------|----------|
| 71  |    | 5PY   | 0.03922  | -0.01419 | 0.03060  | 0.00235  | 0.00081  |
| 72  |    | 5PZ   | 0.00171  | 0.00789  | 0.01201  | 0.01630  | -0.10108 |
| 73  | 9  | N 1S  | 0.04082  | -0.00679 | -0.00979 | 0.01772  | 0.00004  |
| 74  |    | 2S    | -0.09420 | 0.01607  | 0.02199  | -0.03946 | -0.00018 |
| 75  |    | 3S    | -0.13117 | 0.02111  | 0.02024  | -0.06681 | 0.00051  |
| 76  |    | 4PX   | -0.11969 | 0.02100  | 0.00235  | -0.04052 | 0.00030  |
| 77  |    | 4PY   | -0.15218 | 0.01938  | 0.07512  | -0.06932 | -0.00025 |
| 78  |    | 4PZ   | 0.09782  | 0.10256  | -0.01641 | -0.01650 | -0.22527 |
| 79  |    | 5PX   | -0.07532 | 0.01272  | 0.00123  | -0.02087 | 0.00124  |
| 80  |    | 5PY   | -0.05422 | 0.00935  | 0.03796  | -0.02434 | -0.00048 |
| 81  |    | 5PZ   | 0.04820  | 0.05397  | -0.00796 | -0.00763 | -0.11661 |
| 82  | 10 | Cl 1S | -0.00278 | 0.00022  | 0.00833  | -0.00738 | -0.00002 |
| 83  |    | 2S    | -0.03328 | 0.00392  | 0.02801  | -0.02890 | 0.00004  |
| 84  |    | 3PX   | 0.00787  | 0.00044  | 0.00440  | 0.00426  | 0.00100  |
| 85  |    | 3PY   | 0.03597  | -0.00386 | -0.04747 | 0.04222  | 0.00009  |
| 86  |    | 3PZ   | 0.04571  | 0.05328  | 0.00193  | 0.00483  | -0.09719 |
| 87  |    | 4PX   | 0.00446  | 0.00110  | 0.00718  | 0.00289  | 0.00109  |
| 88  |    | 4PY   | 0.05021  | -0.00561 | -0.06066 | 0.05385  | -0.00005 |
| 89  |    | 4PZ   | 0.05237  | 0.06426  | 0.00191  | 0.00513  | -0.11511 |
| 90  | 11 | I 1S  | -0.00021 | -0.00016 | 0.00095  | -0.00012 | -0.00001 |
| 91  |    | 2S    | -0.00583 | -0.00011 | 0.00395  | -0.00136 | 0.00041  |
| 92  |    | 3PX   | -0.01909 | -0.00305 | -0.20863 | 0.15753  | -0.00123 |
| 93  |    | 3PY   | 0.09457  | -0.01095 | 0.35203  | -0.23221 | 0.00005  |
| 94  |    | 3PZ   | 0.12191  | 0.37049  | -0.03021 | -0.03611 | 0.33870  |
| 95  |    | 4PX   | -0.02135 | -0.00197 | -0.18042 | 0.13684  | -0.00096 |
| 96  |    | 4PY   | 0.07510  | -0.00890 | 0.30376  | -0.20375 | 0.00007  |
| 97  |    | 4PZ   | 0.10461  | 0.32271  | -0.02700 | -0.03262 | 0.31970  |
| 98  | 12 | I 1S  | 0.00189  | 0.00104  | -0.00286 | -0.00243 | -0.00121 |
| 99  |    | 2S    | -0.00307 | 0.00492  | -0.00173 | -0.00212 | -0.00276 |
| 100 |    | 3PX   | -0.08881 | 0.01588  | -0.00630 | -0.02274 | -0.00075 |
| 101 |    | 3PY   | 0.43149  | -0.11348 | 0.13824  | 0.19163  | 0.02380  |
| 102 |    | 3PZ   | -0.06773 | -0.36692 | -0.00324 | -0.00380 | 0.26695  |
| 103 |    | 4PX   | -0.06314 | 0.01223  | -0.00616 | -0.01569 | -0.00068 |
| 104 |    | 4PY   | 0.35470  | -0.09126 | 0.11328  | 0.15488  | 0.01831  |
| 105 |    | 4PZ   | -0.06093 | -0.31844 | -0.00732 | -0.00991 | 0.25607  |
| 106 | 13 | C 1S  | -0.00673 | 0.00295  | 0.00540  | 0.00305  | 0.00101  |
| 107 |    | 2S    | 0.01064  | -0.00561 | -0.01337 | -0.01332 | -0.00334 |
| 108 |    | 3S    | 0.08472  | -0.02378 | -0.03160 | 0.02402  | 0.00338  |
| 109 |    | 4PX   | 0.01917  | -0.01357 | -0.06005 | -0.10492 | -0.01283 |
| 110 |    | 4PY   | 0.00392  | 0.00152  | 0.00356  | -0.01999 | -0.00101 |
| 111 |    | 4PZ   | 0.08771  | -0.05723 | -0.06776 | -0.08532 | -0.00571 |
| 112 |    | 5PX   | -0.03915 | 0.01196  | 0.08041  | 0.07240  | 0.00258  |
| 113 |    | 5PY   | 0.03421  | -0.00973 | 0.02598  | 0.02053  | 0.00025  |

|     |    |      |          |          |          |          |          |
|-----|----|------|----------|----------|----------|----------|----------|
| 114 |    | 5PZ  | -0.01431 | -0.01789 | 0.02082  | 0.02490  | 0.00831  |
| 115 | 14 | O 1S | -0.01188 | 0.00646  | -0.00048 | -0.00346 | -0.00274 |
| 116 |    | 2S   | 0.02935  | -0.01500 | 0.00045  | 0.00693  | 0.00565  |
| 117 |    | 3S   | 0.02643  | -0.01965 | 0.00553  | 0.01771  | 0.01337  |
| 118 |    | 4PX  | -0.10026 | 0.00635  | 0.27028  | 0.36934  | 0.03842  |
| 119 |    | 4PY  | 0.04804  | -0.03510 | 0.05120  | 0.09000  | 0.01656  |
| 120 |    | 4PZ  | -0.17382 | 0.08222  | 0.20698  | 0.26863  | 0.02966  |
| 121 |    | 5PX  | -0.05079 | 0.00558  | 0.14062  | 0.19672  | 0.01941  |
| 122 |    | 5PY  | 0.03263  | -0.02234 | 0.02537  | 0.04658  | 0.01126  |
| 123 |    | 5PZ  | -0.08982 | 0.04204  | 0.10540  | 0.13627  | 0.01790  |
| 124 | 15 | C 1S | -0.00173 | 0.00131  | 0.00410  | 0.00623  | 0.00092  |
| 125 |    | 2S   | 0.00281  | -0.00144 | -0.01079 | -0.01664 | -0.00300 |
| 126 |    | 3S   | 0.01754  | -0.01792 | -0.01557 | -0.01884 | 0.00307  |
| 127 |    | 4PX  | 0.03287  | -0.00374 | -0.06982 | -0.08884 | -0.00648 |
| 128 |    | 4PY  | -0.03932 | 0.01963  | -0.00200 | -0.01671 | -0.00613 |
| 129 |    | 4PZ  | 0.07463  | -0.03463 | -0.06952 | -0.08796 | -0.01035 |
| 130 |    | 5PX  | -0.01538 | 0.00624  | 0.01616  | 0.02988  | 0.00185  |
| 131 |    | 5PY  | 0.00869  | -0.00588 | -0.01292 | -0.01912 | -0.00317 |
| 132 |    | 5PZ  | 0.01442  | -0.00561 | -0.00881 | -0.01320 | -0.00274 |
| 133 | 16 | C 1S | -0.00532 | 0.00225  | 0.00948  | 0.01272  | 0.00104  |
| 134 |    | 2S   | 0.01072  | -0.00408 | -0.02110 | -0.02836 | -0.00245 |
| 135 |    | 3S   | 0.03831  | -0.01838 | -0.06965 | -0.09326 | -0.00878 |
| 136 |    | 4PX  | -0.01342 | 0.00764  | 0.05135  | 0.06606  | 0.00499  |
| 137 |    | 4PY  | 0.06225  | -0.02179 | -0.04483 | -0.05284 | -0.00532 |
| 138 |    | 4PZ  | -0.09356 | 0.03562  | 0.09524  | 0.12194  | 0.01253  |
| 139 |    | 5PX  | -0.00406 | 0.00486  | 0.00876  | 0.00984  | 0.00113  |
| 140 |    | 5PY  | 0.00499  | 0.00290  | 0.01117  | 0.01760  | 0.00207  |
| 141 |    | 5PZ  | -0.03849 | 0.01038  | 0.04760  | 0.06823  | 0.00784  |
| 142 | 17 | C 1S | 0.00370  | -0.00158 | 0.00074  | 0.00218  | -0.00074 |
| 143 |    | 2S   | -0.00886 | 0.00392  | -0.00064 | -0.00326 | 0.00141  |
| 144 |    | 3S   | -0.00937 | 0.00292  | -0.02972 | -0.04828 | 0.00324  |
| 145 |    | 4PX  | -0.00249 | -0.01272 | -0.02161 | -0.02431 | -0.00166 |
| 146 |    | 4PY  | -0.05753 | 0.01494  | 0.02020  | 0.01406  | 0.01027  |
| 147 |    | 4PZ  | 0.05065  | -0.02928 | -0.04053 | -0.05027 | -0.00502 |
| 148 |    | 5PX  | 0.00992  | -0.00281 | -0.01009 | -0.02165 | -0.00373 |
| 149 |    | 5PY  | -0.01452 | -0.00035 | 0.00732  | 0.00443  | 0.00586  |
| 150 |    | 5PZ  | 0.02014  | -0.01620 | -0.04304 | -0.05974 | -0.00545 |
| 151 | 18 | C 1S | -0.01221 | 0.00370  | 0.00885  | 0.01126  | 0.00374  |
| 152 |    | 2S   | 0.02295  | -0.00742 | -0.01917 | -0.02493 | -0.00673 |
| 153 |    | 3S   | 0.09266  | -0.01473 | -0.07263 | -0.09297 | -0.03256 |
| 154 |    | 4PX  | 0.01654  | 0.03470  | 0.05848  | 0.07853  | 0.00118  |
| 155 |    | 4PY  | 0.09936  | -0.01999 | -0.04105 | -0.04024 | -0.01825 |
| 156 |    | 4PZ  | -0.09240 | 0.05733  | 0.10032  | 0.12923  | 0.01469  |

|     |    |      |          |          |          |          |          |
|-----|----|------|----------|----------|----------|----------|----------|
| 157 |    | 5PX  | -0.00470 | 0.01101  | 0.00644  | 0.02692  | 0.00124  |
| 158 |    | 5PY  | 0.03599  | -0.01382 | -0.04336 | -0.04975 | -0.00693 |
| 159 |    | 5PZ  | -0.02123 | 0.02012  | 0.04999  | 0.06612  | 0.00777  |
| 160 | 19 | H 1S | -0.02086 | 0.01040  | 0.05773  | 0.08102  | 0.00899  |
| 161 |    | 2S   | -0.05674 | 0.01977  | 0.14533  | 0.15277  | 0.01436  |
| 162 | 20 | H 1S | -0.02907 | 0.01855  | 0.00474  | 0.00434  | 0.00127  |
| 163 |    | 2S   | -0.02907 | 0.02258  | 0.00359  | -0.00112 | -0.00057 |
| 164 | 21 | H 1S | -0.01357 | -0.00160 | 0.05741  | 0.07925  | 0.00839  |
| 165 |    | 2S   | -0.02589 | 0.00281  | 0.09462  | 0.13359  | 0.01186  |
| 166 | 22 | H 1S | -0.02925 | 0.01020  | 0.01861  | 0.01988  | 0.00200  |
| 167 |    | 2S   | -0.04369 | 0.01666  | 0.04900  | 0.06154  | 0.00716  |
| 168 | 23 | H 1S | 0.00939  | -0.00151 | 0.01450  | 0.02054  | 0.00118  |
| 169 |    | 2S   | 0.00281  | -0.00165 | 0.02225  | 0.03191  | 0.00188  |
| 170 | 24 | H 1S | 0.03594  | -0.02322 | -0.04034 | -0.04905 | -0.00524 |
| 171 |    | 2S   | 0.03706  | -0.02382 | -0.02680 | -0.02623 | -0.00363 |
| 172 | 25 | H 1S | 0.01568  | 0.00580  | 0.01181  | 0.01736  | -0.00138 |
| 173 |    | 2S   | 0.02722  | 0.00392  | 0.02223  | 0.02899  | -0.00154 |
| 174 | 26 | H 1S | 0.02545  | 0.00786  | 0.01613  | 0.02826  | -0.00147 |
| 175 |    | 2S   | 0.00036  | 0.00839  | 0.03352  | 0.04281  | 0.00900  |
| 176 | 27 | H 1S | -0.03808 | 0.01024  | 0.01670  | 0.01957  | 0.00290  |
| 177 |    | 2S   | -0.06165 | 0.01617  | 0.02325  | 0.03118  | 0.00668  |



## Experimental Section

$^1\text{H}$  NMR and  $^{13}\text{C}$  NMR were measured by Jeol JNM-ECZ 400s (400 MHz / 100MHz) and Bruker AV800 (800MHz/200MHz) spectrometer in  $\text{CDCl}_3$ ,  $\text{DMSO-}d_6$ , and chemical shifts were reported as ppm ( $\delta$ ) unit relative to the solvent peaks. The  $^1\text{H}$  NMR data were reported as peak multiplicities: s for singlet; d for doublet; dd for doublet of doublets; t for triplet; td for triplet of doublet; q for quartet; quin for quintet; bs for broad singlet and m for multiplet. Coupling constants were reported in Hertz. All reactions were routinely carried out under an inert atmosphere of dry nitrogen. Reactions were checked by thin –layer chromatography (Kieselgel 60 F254, Merck). Spots were detected by viewing under a UV light, and by colorizing with charring after dipping in a *p*-anisaldehyde solution. High Resolution Mass Spectra (HRMS) were obtained using Electrospray Ionization (ESI), Fast atom bombardment (FAB), and Electron Ionization (EI). Flash column chromatograph was performed on silica gel (Kieselgel 60, 230). All materials were purchased from TCI, Alfa Aesar, Sigma Aldrich, and other commercial suppliers and were used without further purification.

### General Procedure for C2-Selective Sonogashira Coupling (A)

To a solution of **1** (0.2 mmol, 1 equiv) in DMF (5.0 mL) were added  $\text{Pd}(\text{PPh}_3)_4$  (0.02 mmol, 0.1 equiv),  $\text{CuI}$  (0.04 mmol, 0.2 equiv),  $i\text{Pr}_2\text{NH}$  (0.6 mmol, 3 equiv), and followed by appropriate alkyne (0.22 mmol, 1.1 equiv) dropwise. After being stirred at room temperature under  $\text{N}_2$ , the reaction mixture was quenched by  $\text{H}_2\text{O}$  and extracted by  $\text{Et}_2\text{O}$ . The combined organic layers were dried with  $\text{MgSO}_4$ , filtered, and evaporated. Then, the residue was purified by flash silica gel chromatography.

### General Procedure for C8-Selective Sonogashira Coupling (B)

To a solution of **1** (0.2 mmol, 1 equiv) in DMF (5.0 mL) were added  $\text{Pd}_2(\text{dba})_3\text{CHCl}_3$  (0.02 mmol, 0.1 equiv),  $\text{CuI}$  (0.04 mmol, 0.2 equiv),  $i\text{Pr}_2\text{NH}$  (0.6 mmol, 3 equiv), and followed by appropriate alkyne (0.22 mmol, 1.1 equiv) dropwise. After being stirred at room temperature under  $\text{N}_2$ , the reaction mixture was quenched by  $\text{H}_2\text{O}$  and extracted by  $\text{Et}_2\text{O}$ . The combined organic layers were dried with  $\text{MgSO}_4$ , filtered, and evaporated. Then, the residue was purified by flash silica gel chromatography.

### General Procedure for Screening of Phosphine Ligand (C)

To a solution of **1a** (0.2 mmol, 1 equiv) in DMF (5.0 mL) were added Pd(OAc)<sub>2</sub> (0.02 mmol, 0.1 equiv), CuI (0.04 mmol, 0.2 equiv), *i*Pr<sub>2</sub>NH (0.6 mmol, 3 equiv), and appropriate phosphine ligand (0.02 mmol, 0.1 equiv for bidentate ligand or 0.04 mmol, 0.2 equiv for monodentate ligand), then stirred for 30 min at room temperature under N<sub>2</sub>. To the reaction mixture was dropwise added 1-hexyne (0.22 mmol, 1.1 equiv) and stirred for 18 h at room temperature under N<sub>2</sub>. The reaction mixture was quenched by H<sub>2</sub>O and extracted by Et<sub>2</sub>O. The combined organic layers were dried with MgSO<sub>4</sub>, filtered, and evaporated. Then, the residue was purified by flash silica gel chromatography.

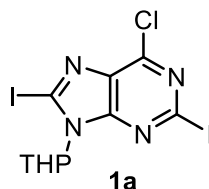

### 6-Chloro-2,8-diiodo-9-(tetrahydro-2H-pyran-2-yl)-9H-purine (**1a**)<sup>[10]</sup>

Compound **1a** was prepared by following the reported procedure.<sup>[10]</sup> <sup>1</sup>H NMR (400 MHz, CDCl<sub>3</sub>) δ 5.66 (dd, *J* = 11.3, 2.5 Hz, 1H), 4.21-4.17 (m, 1H), 3.74 (td, *J* = 11.8, 2.5 Hz, 1H), 3.04 (qd, *J* = 12.3, 4.1 Hz, 1H), 2.18-2.15 (m, 1H), 1.91-1.63 (m, 4H); <sup>13</sup>C NMR (100 MHz, DMSO-*d*<sub>6</sub>) δ 153.00, 146.82, 133.45, 117.94, 113.02, 86.38, 68.24, 27.96, 24.39, 22.44; HRMS (ESI) found 490.8637 [calcd for C<sub>10</sub>H<sub>10</sub>ClI<sub>2</sub>N<sub>4</sub>O<sup>+</sup>(M+H)<sup>+</sup> 490.8627].

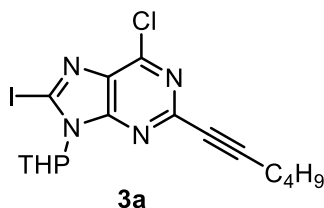

### 6-Chloro-2-(hex-1-yn-1-yl)-8-iodo-9-(tetrahydro-2H-pyran-2-yl)-9H-purine (**3a**)

Compound **3a** was prepared from **1a** (100 mg, 0.20 mmol) as a white solid (52 mg, 57%) by following general procedure (A) using 1-hexyne (0.025 mL, 0.22 mmol). (Reaction time: 18

h).  $R_f = 0.55$  (silica gel, hexane/EtOAc, 2/1);  $^1\text{H}$  NMR (400 MHz,  $\text{DMSO-}d_6$ )  $\delta$  5.64 (dd,  $J = 11.0, 1.8$  Hz, 1H), 4.08 (d,  $J = 11.0$  Hz, 1H), 3.71 (td,  $J = 11.1, 2.6$  Hz, 1H), 2.93 (qd,  $J = 12.2, 3.6$  Hz, 1H), 2.51 (t,  $J = 6.8$  Hz, 2H), 2.02 (d,  $J = 11.9$  Hz, 1H), 1.91 (d,  $J = 12.4$  Hz, 1H), 1.76-1.40 (m, 7H), 0.92 (t,  $J = 7.1$  Hz, 3H);  $^{13}\text{C}$  NMR (100 MHz,  $\text{DMSO-}d_6$ )  $\delta$  152.32, 147.23, 144.00, 132.56, 113.25, 90.21, 86.28, 79.72, 68.25, 29.60, 28.07, 24.38, 22.46, 21.51, 17.99, 13.43; HRMS (FAB) found 445.0288 [calcd for  $\text{C}_{16}\text{H}_{19}\text{ClIN}_4\text{O}^+(\text{M}+\text{H})^+$  445.0292].

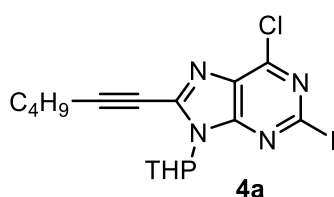

#### 6-Chloro-8-(hex-1-yn-1-yl)-2-iodo-9-(tetrahydro-2H-pyran-2-yl)-9H-purine (4a)

Compound **4a** was prepared from **1a** (100 mg, 0.20 mmol) as a white solid (63 mg, 69%) by following general procedure (B) using 1-hexyne (0.025 mL, 0.22 mmol). (Reaction time: 18 h).  $R_f = 0.70$  (silica gel, hexane/EtOAc, 2/1); H NMR (400 MHz,  $\text{DMSO-}d_6$ )  $\delta$  5.72 (dd,  $J = 11.0, 1.8$  Hz, 1H), 4.07 (d,  $J = 11.5$  Hz, 1H), 3.71-3.65 (m, 1H), 2.73 (qd,  $J = 12.4, 3.6$  Hz, 1H), 2.66 (t,  $J = 6.9$  Hz, 2H), 2.00 (d,  $J = 12.9$  Hz, 1H), 1.91 (d,  $J = 12.9$  Hz, 1H), 1.75-1.44 (m, 7H), 0.94 (t,  $J = 7.1$  Hz, 3H);  $^{13}\text{C}$  NMR (100 MHz,  $\text{DMSO-}d_6$ )  $\delta$  151.87, 148.19, 138.64, 130.55, 118.89, 101.76, 83.37, 70.24, 68.26, 29.18, 28.32, 24.42, 22.41, 21.45, 18.40, 13.40; HRMS (ESI) found 445.0299 [calcd for  $\text{C}_{16}\text{H}_{19}\text{ClIN}_4\text{O}^+(\text{M}+\text{H})^+$  445.0287].

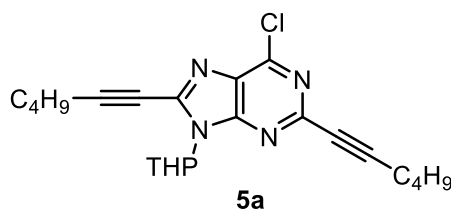

#### 6-Chloro-2,8-di(hex-1-yn-1-yl)-9-(tetrahydro-2H-pyran-2-yl)-9H-purine (5a)

Compound **5a** was prepared from **1a** (100 mg, 0.20 mmol) as a white solid (7 mg, 9%) by general procedure (B) using 1-hexyne (0.025 mL, 0.22 mmol). (Reaction time: 18 h).  $R_f = 0.68$

(silica gel, hexane/EtOAc, 1/1);  $^1\text{H}$  NMR (400 MHz,  $\text{CDCl}_3$ )  $\delta$  5.84 (dd,  $J = 11.2, 2.5$  Hz, 1H), 4.18 (d,  $J = 11.4$  Hz, 1H), 3.71 (td,  $J = 12.0, 2.4$  Hz, 1H), 2.90 (qd,  $J = 12.2, 4.1$  Hz, 1H), 2.57 (t,  $J = 7.1$  Hz, 2H), 2.48 (t,  $J = 7.3$  Hz, 2H), 2.10 (d,  $J = 11.0$  Hz, 1H), 1.86-1.44 (m, 12H), 0.97 (t,  $J = 7.2$  Hz, 3H), 0.94 (t,  $J = 7.2$  Hz, 3H);  $^{13}\text{C}$  NMR (100 MHz,  $\text{CDCl}_3$ )  $\delta$  151.33, 150.11, 146.31, 139.61, 130.22, 101.59, 91.17, 83.46, 79.78, 70.91, 69.29, 30.21, 29.84, 29.42, 24.87, 23.30, 22.30, 22.18, 19.51, 19.29, 13.75, 13.65; HRMS (ESI) found 399.1955 [calcd for  $\text{C}_{22}\text{H}_{28}\text{ClN}_4\text{O}^+(\text{M}+\text{H})^+$  339.1946].

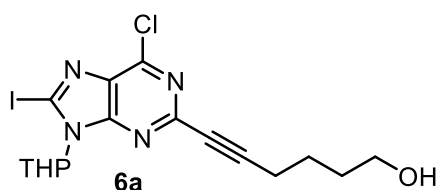

#### 6-(6-Chloro-8-iodo-9-(tetrahydro-2H-pyran-2-yl)-9H-purin-2-yl)hex-5-yn-1-ol (6a)

Compound **6a** was prepared from **1a** (100 mg, 0.20 mmol) as a white solid (54 mg, 59%) by following general procedure (A) using 5-hexynol (0.024 mL, 0.22 mmol). (Reaction time: 4 h).  $R_f = 0.26$  (silica gel, hexane/EtOAc, 1/1);  $^1\text{H}$  NMR (400 MHz,  $\text{CDCl}_3$ )  $\delta$  5.76 (dd,  $J = 11.6, 2.4$  Hz, 1H), 4.22-4.18 (m, 1H), 3.74 (td,  $J = 11.6$  Hz, 1H), 3.72 (t,  $J = 5.6$  Hz, 2H), 3.05 (qd,  $J = 12.4, 4.3$  Hz, 1H), 2.56-2.52 (m, 2H), 2.17-2.13 (m, 1H), 1.89-1.72 (m, 7H), 1.63 (d,  $J = 14.7$  Hz, 1H);  $^{13}\text{C}$  NMR (100 MHz,  $\text{DMSO}-d_6$ )  $\delta$  152.34, 147.25, 144.01, 132.58, 113.34, 90.29, 86.29, 79.77, 68.27, 60.11, 31.72, 28.10, 24.40, 24.29, 22.47, 18.17; HRMS (FAB) found 461.0231 [calcd for  $\text{C}_{16}\text{H}_{19}\text{ClIN}_4\text{O}_2^+(\text{M}+\text{H})^+$  461.0241].

\

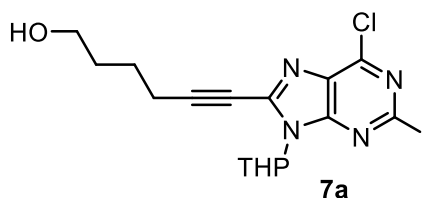

#### 6-(6-Chloro-2-iodo-9-(tetrahydro-2H-pyran-2-yl)-9H-purin-8-yl)hex-5-yn-1-ol (7a)

Compound **7a** was prepared from **1a** (100 mg, 0.20 mmol) as a white solid (47 mg, 51%) by

following general procedure (B) using 5-hexynol (0.024 mL, 0.22 mmol). (Reaction time: 4 h).  $R_f = 0.25$  (silica gel, hexane/EtOAc, 1/3);  $^1\text{H NMR}$  (400 MHz,  $\text{CDCl}_3$ )  $\delta$  5.77 (dd,  $J = 11.4, 2.4$  Hz, 1H), 4.20-4.16 (m, 1H), 3.73 (t,  $J = 6.0$  Hz, 2H), 3.72 (td,  $J = 11.6, 2.4$  Hz, 1H), 2.89 (qd,  $J = 12.3, 4.2$  Hz, 1H), 2.63 (t,  $J = 6.8$  Hz, 2H), 2.14-2.10 (m, 1H), 1.88-1.59 (m, 8H);  $^{13}\text{C NMR}$  (100 MHz,  $\text{CDCl}_3$ )  $\delta$  151.89, 149.79, 139.13, 131.28, 117.00, 101.30, 83.90, 70.75, 69.31, 62.20, 31.87, 29.24, 24.85, 24.27, 23.24, 19.65; HRMS (ESI) found 461.0221 [calcd for  $\text{C}_{16}\text{H}_{19}\text{ClIN}_4\text{O}_2^+(\text{M}+\text{H})^+$  461.0236].

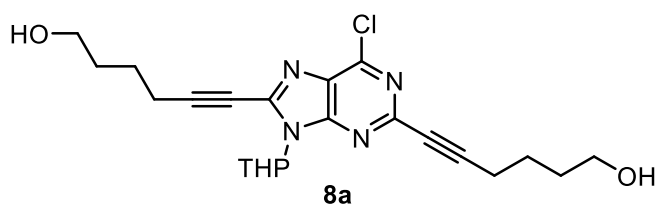

**6,6'-(6-Chloro-9-(tetrahydro-2H-pyran-2-yl)-9H-purine-2,8-diyl)bis(hex-5-yn-1-ol) (8a)**

Compound **8a** was prepared from **1a** (100 mg, 0.20 mmol) as a white solid (14 mg, 16%) by following general procedure (A) using 5-hexynol (0.024 mL, 0.22 mmol). (Reaction time: 4 h).  $R_f = 0.07$  (silica gel, hexane/EtOAc, 1/3);  $^1\text{H NMR}$  (400 MHz,  $\text{CDCl}_3$ )  $\delta$  5.84 (dd,  $J = 11.4, 2.3$  Hz, 1H), 4.20-4.17 (m, 1H), 3.75-3.69 (m, 5H), 2.89 (qd,  $J = 12.2, 4.1$  Hz, 1H), 2.62 (t,  $J = 6.6$  Hz, 2H), 2.54 (t,  $J = 6.6$  Hz, 2H), 2.12-2.09 (m, 1H), 1.86-1.61 (m, 12H);  $^{13}\text{C NMR}$  (100 MHz,  $\text{CDCl}_3$ )  $\delta$  151.32, 150.18, 146.22, 139.55, 130.28, 101.15, 90.63, 83.54, 80.13, 71.17, 69.32, 62.44, 62.20, 32.06, 31.89, 29.46, 24.89, 24.44, 24.28, 23.28, 19.65, 19.37; HRMS (ESI) found 431.1843 [calcd for  $\text{C}_{22}\text{H}_{28}\text{ClIN}_4\text{O}_3^+(\text{M}+\text{H})^+$  431.1844].

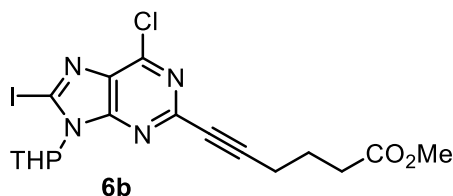

**Methyl 6-(6-chloro-8-iodo-9-(tetrahydro-2H-pyran-2-yl)-9H-purin-2-yl)hex-5-ynoate (6b)**

Compound **6b** was prepared from **1a** (100 mg, 0.20 mmol) as a white solid (51 mg, 52%) by

following general procedure (A) using methyl 5-hexynoate (0.029 mL, 0.22 mmol). (Reaction time: 15 h).  $R_f = 0.26$  (silica gel, hexane/EtOAc, 2/1);  $^1\text{H NMR}$  (400 MHz,  $\text{CDCl}_3$ )  $\delta$  5.76 (dd,  $J = 11.0, 2.5$  Hz, 1H), 4.23-4.19 (m, 1H), 3.74 (td,  $J = 12.1, 2.2$  Hz, 1H), 3.70 (s, 3H), 3.06 (qd,  $J = 12.5, 4.3$  Hz, 1H), 2.57 (t,  $J = 7.6$  Hz, 2H), 2.54 (t,  $J = 7.6$  Hz, 2H), 2.17-2.13 (m, 1H), 2.04-1.97 (m, 2H), 1.89-1.73 (m, 3H), 1.64 (d,  $J = 12.9$  Hz, 1H);  $^{13}\text{C NMR}$  (100 MHz,  $\text{CDCl}_3$ )  $\delta$  173.51, 152.57, 149.20, 145.40, 133.22, 105.87, 89.54, 86.40, 80.34, 69.38, 51.82, 33.01, 29.09, 24.68, 23.31, 23.25, 18.99; HRMS (FAB) found 489.0187 [calcd for  $\text{C}_{17}\text{H}_{19}\text{ClIN}_4\text{O}_3^+(\text{M}+\text{H})^+$  489.0190].

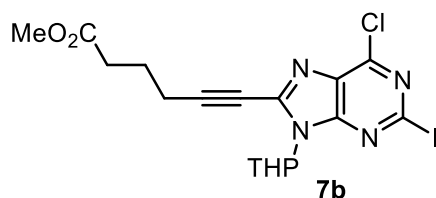

#### Methyl 6-(6-chloro-2-iodo-9-(tetrahydro-2H-pyran-2-yl)-9H-purin-8-yl)hex-5-ynoate (7b)

Compound **7b** was prepared from **1a** (100 mg, 0.20 mmol) as a white solid (52 mg, 53%) by following general procedure (B) using methyl 5-hexynoate (0.029 mL, 0.22 mmol). (Reaction time: 15 h).  $R_f = 0.27$  (silica gel, hexane/EtOAc, 1/1);  $^1\text{H NMR}$  (400 MHz,  $\text{CDCl}_3$ )  $\delta$  5.77 (dd,  $J = 11.5, 2.5$  Hz, 1H), 4.20-4.17 (m, 1H), 3.73 (td,  $J = 11.6, 2.0$  Hz, 1H), 3.70 (s, 3H), 2.87 (qd,  $J = 8.8, 4.0$  Hz, 1H), 2.66 (t,  $J = 7.0$  Hz, 2H), 2.55 (t,  $J = 7.2$  Hz, 2H), 2.14-2.11 (m, 1H), 2.07-1.99 (m, 2H), 1.89-1.85 (m, 1H), 1.78-1.72 (m, 2H), 1.66-1.63 (m, 1H);  $^{13}\text{C NMR}$  (100 MHz,  $\text{CDCl}_3$ )  $\delta$  173.17, 151.86, 149.89, 138.89, 131.25, 117.09, 100.11, 83.88, 71.19, 69.31, 51.91, 32.76, 29.32, 24.84, 23.21, 23.07, 19.20; HRMS (ESI) found 489.0168 [calcd for  $\text{C}_{17}\text{H}_{19}\text{ClIN}_4\text{O}_3^+(\text{M}+\text{H})^+$  489.0185].

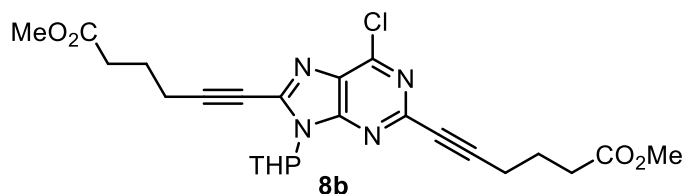

#### Dimethyl 6,6'-(6-chloro-9-(tetrahydro-2H-pyran-2-yl)-9H-purine-2,8-diyl)bis(hex-5-ynoate) (8b)

Compound **8b** was prepared from **1a** (100 mg, 0.20 mmol) as a white solid (18 mg, 18%) by

general procedure (A) using methyl 5-hexynoate (0.029 mL, 0.22 mmol). (Reaction time: 15 h).  $R_f = 0.10$  (silica gel, hexane/EtOAc, 2/1);  $^1\text{H NMR}$  (400 MHz,  $\text{CDCl}_3$ )  $\delta$  5.84 (dd,  $J = 11.3$ , 2.5 Hz, 1H), 4.19 (dd,  $J = 13.7$ , 2.2 Hz, 1H), 3.75 (td,  $J = 11.6$ , 2.4 Hz, 1H), 3.70 (s, 3H), 3.70 (s, 3H), 2.88 (qd,  $J = 12.3$ , 4.1 Hz, 1H), 2.67 (t,  $J = 6.9$  Hz, 2H), 2.58 (t,  $J = 6.8$  Hz, 3H), 2.54 (t,  $J = 6.8$  Hz, 3H) 2.13-2.10 (m, 1H), 2.06-1.97 (m, 4H), 1.88-1.68 (m, 3H), 1.64 (d,  $J = 10.6$  Hz, 1H);  $^{13}\text{C NMR}$  (100 MHz,  $\text{CDCl}_3$ )  $\delta$  173.50, 173.21, 151.28, 150.29, 146.12, 139.37, 130.33, 99.98, 89.50, 83.54, 80.48, 71.60, 69.32, 51.89, 51.81, 33.00, 32.77, 29.54, 24.88, 23.31, 23.25, 23.09, 19.21, 19.01; HRMS (ESI) found 487.1738 [calcd for  $\text{C}_{24}\text{H}_{28}\text{ClN}_4\text{O}_5^+(\text{M}+\text{H})^+$  487.1743].

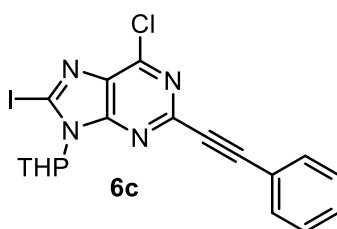

#### 6-Chloro-8-iodo-2-(phenylethynyl)-9-(tetrahydro-2H-pyran-2-yl)-9H-purine (6c)<sup>[4]</sup>

Compound **6c** was prepared from **1a** (100 mg, 0.20 mmol) as a white solid (51 mg, 55%) by following general procedure (A) using phenylacetylene (0.024 mL, 0.22 mmol). (Reaction time: 18 h).  $R_f = 0.27$  (silica gel, hexane/EtOAc, 3/1), and the  $^1\text{H NMR}$  data of **6c** was identical to those reported before.<sup>4</sup>  $^1\text{H NMR}$  (400 MHz,  $\text{CDCl}_3$ )  $\delta$  7.70-7.67 (m, 2H), 7.43-7.36 (m, 3H), 5.77 (dd,  $J = 11.1$ , 2.3 Hz, 1H), 4.25-4.21 (m, 1H), 3.76 (td,  $J = 12.1$ , 2.2 Hz, 1H), 3.12 (qd,  $J = 12.4$ , 4.1 Hz, 1H), 2.19-2.16 (m, 1H), 1.93-1.64 (m, 4H).

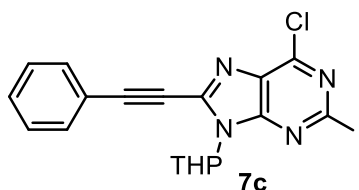

#### 6-Chloro-2-iodo-8-(phenylethynyl)-9-(tetrahydro-2H-pyran-2-yl)-9H-purine (7c)

Compound **7c** was prepared from **1a** (100 mg, 0.20 mmol) as a white solid (56 mg, 60%) by

following general procedure (B) using phenylacetylene (0.024 mL, 0.22 mmol). (Reaction time: 18 h).  $R_f = 0.43$  (silica gel, hexane/EtOAc, 3/1);  $^1\text{H}$  NMR (400 MHz,  $\text{CDCl}_3$ )  $\delta$  7.66 (s, 1H), 7.65 (s, 1H), 7.52-7.42 (m, 3H), 5.88 (dd,  $J = 11.3, 2.1$  Hz, 1H), 4.25-4.22 (m, 1H), 3.77 (td,  $J = 12.0, 4.0$  Hz, 1H), 2.92 (qd,  $J = 12.2, 4.1$  Hz, 1H), 2.17-2.14 (m, 1H), 1.94 (d,  $J = 12.2$  Hz, 1H), 1.89-1.72 (m, 2H), 1.68 (d,  $J = 11.0$  Hz, 1H);  $^{13}\text{C}$  NMR (100 MHz,  $\text{CDCl}_3$ )  $\delta$  151.93, 150.00, 138.89, 132.43, 131.48, 130.89, 128.95, 120.34, 117.24, 98.43, 83.84, 78.58, 69.39, 29.55, 24.99, 23.25; HRMS (FAB) found 464.9969 [calcd for  $\text{C}_{18}\text{H}_{15}\text{ClIN}_4\text{O}^+(\text{M}+\text{H})^+$  464.9979].

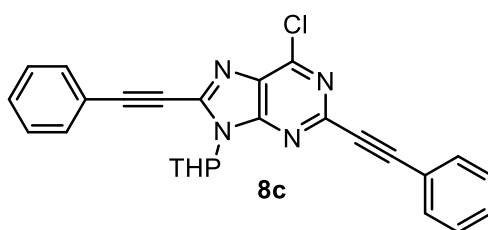

#### 6-Chloro-2,8-bis(phenylethynyl)-9-(tetrahydro-2H-pyran-2-yl)-9H-purine (8c)<sup>[4]</sup>

Compound **8c** was prepared from **1a** (100 mg, 0.20 mmol) as a white solid (18 mg, 21%) by general procedure (A) using phenylacetylene (0.024 mL, 0.22 mmol). (Reaction time: 18 h).  $R_f = 0.37$  (silica gel, hexane/EtOAc, 3/1). The  $^1\text{H}$  and  $^{13}\text{C}$  NMR data of **8c** was in agreement with literature.<sup>4</sup>  $^1\text{H}$  NMR (400 MHz,  $\text{CDCl}_3$ )  $\delta$  7.70-7.67 (m, 4H), 7.52-7.37 (m, 6H), 5.98 (dd,  $J = 11.0, 1.8$  Hz, 1H), 4.26 (d,  $J = 11.6$  Hz, 1H), 3.80 (t,  $J = 11.3$  Hz, 1H), 2.98 (qd,  $J = 12.1, 3.7$  Hz, 1H), 2.18-2.15 (m, 1H), 1.98-1.68 (m, 4H);  $^{13}\text{C}$  NMR (100 MHz,  $\text{CDCl}_3$ )  $\delta$  151.46, 150.54, 146.38, 139.56, 132.77, 132.41, 130.79, 130.65, 129.88, 128.94, 128.57, 121.41, 120.51, 98.53, 88.59, 87.97, 83.69, 69.44, 29.74, 25.05, 23.32.

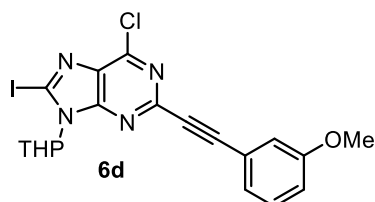

#### 6-Chloro-8-iodo-2-((3-methoxyphenyl)ethynyl)-9-(tetrahydro-2H-pyran-2-yl)-9H-purine (6d)

Compound **6d** was prepared from **1a** (100 mg, 0.20 mmol) as a white solid (57 mg, 58%) by



following general procedure (A) using 3-methoxyphenylacetylene (0.028 mL, 0.22 mmol). (Reaction time: 1.5 h).  $R_f = 0.21$  (silica gel, hexane/EtOAc, 2/1);  $^1\text{H NMR}$  (400 MHz,  $\text{CDCl}_3$ )  $\delta$  7.30-7.28 (m, 2H), 7.21 (d,  $J = 1.8$  Hz, 1H), 6.99-6.96 (m, 1H), 5.77 (dd,  $J = 11.3, 2.5$  Hz, 1H), 4.25-4.21 (m, 1H), 3.83 (s, 3H), 3.76 (td,  $J = 12.1, 2.1$  Hz, 1H), 3.12 (qd,  $J = 12.3, 4.0$  Hz, 1H), 2.19-2.15 (m, 1H), 1.93-1.71 (m, 3H), 1.65 (d,  $J = 13.8$  Hz, 1H);  $^{13}\text{C NMR}$  (100 MHz,  $\text{CDCl}_3$ )  $\delta$  159.46, 152.67, 149.35, 145.56, 133.30, 129.68, 125.33, 122.34, 117.21, 116.88, 106.35, 88.34, 87.58, 86.66, 69.44, 55.54, 29.09, 24.71, 23.37; HRMS (FAB) found 495.0073 [calcd for  $\text{C}_{19}\text{H}_{17}\text{ClIN}_4\text{O}_2^+(\text{M}+\text{H})^+$  495.0085].

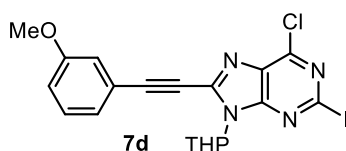

### 6-Chloro-2-iodo-8-((3-methoxyphenyl)ethynyl)-9-(tetrahydro-2H-pyran-2-yl)-9H-purine (7d)

Compound **7d** was prepared from **1a** (100 mg, 0.20 mmol) as a white solid (55 mg, 56%) by following general procedure (B) using 3-methoxyphenylacetylene (0.028 mL, 0.22 mmol). (Reaction time: 1.5 h).  $R_f = 0.51$  (silica gel, hexane/EtOAc, 2/1);  $^1\text{H NMR}$  (400 MHz,  $\text{CDCl}_3$ )  $\delta$  7.35 (t,  $J = 7.9$  Hz, 1H), 7.25 (d,  $J = 10.2$  Hz, 1H), 7.17 (s, 1H), 7.05 (dd,  $J = 8.6, 2.4$  Hz, 1H), 5.87 (dd,  $J = 11.0, 2.4$  Hz, 1H), 4.25-4.22 (m, 1H), 3.85 (s, 3H), 3.77 (td,  $J = 11.6, 2.4$  Hz, 1H), 2.91 (qd,  $J = 12.1, 4.0$  Hz, 1H), 2.17-2.14 (m, 1H), 1.94 (d,  $J = 12.2$  Hz, 1H), 1.86-1.72 (m, 2H), 1.68 (d,  $J = 11.0$  Hz, 1H);  $^{13}\text{C NMR}$  (100 MHz,  $\text{CDCl}_3$ )  $\delta$  159.62, 151.92, 150.01, 138.84, 131.48, 130.07, 124.85, 121.26, 117.37, 117.26, 98.36, 83.82, 78.31, 69.38, 55.57, 29.57, 24.99, 23.24; HRMS (FAB) found 495.0091 [calcd for  $\text{C}_{19}\text{H}_{17}\text{ClIN}_4\text{O}_2^+(\text{M}+\text{H})^+$  495.0085].

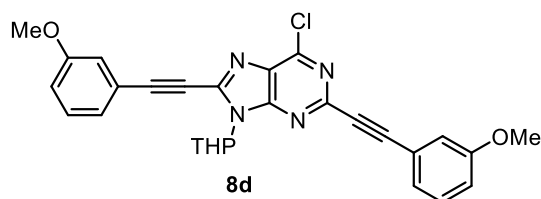

**6-Chloro-2,8-bis((3-methoxyphenyl)ethynyl)-9-(tetrahydro-2H-pyran-2-yl)-9H-purine (8d)**

Compound **8d** was prepared from **1a** (100 mg, 0.20 mmol) as a white solid (9 mg, 9%) by following general procedure (A) using 3-methoxyphenylacetylene (0.028 mL, 0.22 mmol). (Reaction time: 1.5 h).  $R_f = 0.40$  (silica gel, hexane/EtOAc, 1/1);  $^1\text{H NMR}$  (400 MHz,  $\text{CDCl}_3$ )  $\delta$  7.36 (t,  $J = 8.3$  Hz, 1H), 7.31-7.27 (m, 3H), 7.23-7.22 (m, 1H), 7.20-7.19 (m, 1H), 7.05 (dd,  $J = 7.9, 2.4$  Hz, 1H), 7.00-6.97 (m, 1H), 5.98 (dd,  $J = 11.0, 2.4$  Hz, 1H), 4.26 (d,  $J = 12.2$  Hz, 1H), 3.86 (s, 3H), 3.84 (s, 3H), 3.80 (t,  $J = 11.9$  Hz, 1H), 2.98 (qd,  $J = 12.2, 4.1$  Hz, 1H), 2.17 (d,  $J = 11.0$  Hz, 1H), 1.96 (d,  $J = 12.8$  Hz, 1H), 1.90-1.74 (m, 2H), 1.70 (d,  $J = 11.0$  Hz, 1H);  $^{13}\text{C NMR}$  (100 MHz,  $\text{CDCl}_3$ )  $\delta$  159.62, 159.42, 151.45, 150.56, 146.33, 139.53, 130.67, 130.05, 129.67, 125.34, 124.83, 122.34, 121.43, 117.31, 117.22, 117.17, 116.90, 98.48, 88.55, 87.69, 83.66, 78.72, 69.44, 55.57, 55.53, 29.76, 25.05, 23.32; HRMS (FAB) found 499.1530 [calcd for  $\text{C}_{28}\text{H}_{24}\text{ClN}_4\text{O}_3^+(\text{M}+\text{H})^+$  499.1537].

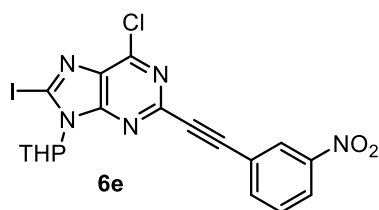

**6-Chloro-8-iodo-2-((3-nitrophenyl)ethynyl)-9-(tetrahydro-2H-pyran-2-yl)-9H-purine (6e)**

Compound **6e** was prepared from **1a** (100 mg, 0.20 mmol) as a white solid (47 mg, 46%) by following general procedure (A) using 3-nitrophenylacetylene (0.027 mL, 0.22 mmol). (Reaction time: 3.5 h).  $R_f = 0.38$  (silica gel, hexane/EtOAc, 2/1);  $^1\text{H NMR}$  (400 MHz,  $\text{CDCl}_3$ )  $\delta$  8.55 (t,  $J = 1.8$  Hz, 1H), 8.29-8.26 (m, 1H), 7.98 (dd,  $J = 6.1, 1.2$  Hz, 1H), 7.60 (t,  $J = 8.0$  Hz, 1H), 5.76 (dd,  $J = 11.7, 2.5$  Hz, 1H), 4.26-4.22 (m, 1H), 3.77 (td,  $J = 12.0, 2.2$  Hz, 1H), 3.14 (qd,  $J = 12.3, 4.1$  Hz, 1H), 2.19 (d,  $J = 12.3$  Hz, 1H), 1.95-1.72 (m, 3H), 1.67 (d,  $J = 13.5$  Hz, 1H);  $^{13}\text{C NMR}$  (100 MHz,  $\text{CDCl}_3$ )  $\delta$  152.60, 149.49, 148.20, 144.69, 138.19, 133.71, 129.79, 127.55, 124.51, 123.34, 107.31, 89.66, 86.98, 84.90, 69.49, 29.05, 24.69, 23.37; HRMS (EI) found 424.9173 [calcd for  $\text{C}_{13}\text{H}_5\text{ClIN}_5\text{O}_2^+(\text{M}-\text{THP})^+$  424.9177].

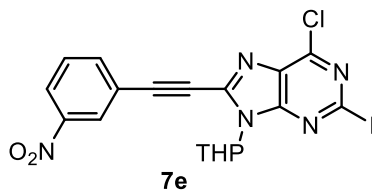

### 6-Chloro-2-iodo-8-((3-nitrophenyl)ethynyl)-9-(tetrahydro-2H-pyran-2-yl)-9H-purine (7e)

Compound **7e** was prepared from **1a** (100 mg, 0.20 mmol) as a white solid (63 mg, 62%) by following general procedure **(B)** using 3-nitrophenylacetylene (0.027 mL, 0.22 mmol). (Reaction time: 3.5 h).  $R_f = 0.24$  (silica gel, hexane/EtOAc, 2/1);  $^1\text{H NMR}$  (400 MHz,  $\text{CDCl}_3$ )  $\delta$  8.50 (t,  $J = 1.8$  Hz, 1H), 8.35 (dd,  $J = 7.9, 1.8$  Hz, 1H), 7.97 (d,  $J = 7.9$  Hz, 1H), 7.67 (t,  $J = 7.9$  Hz, 1H), 5.90 (dd,  $J = 11.6, 2.4$  Hz, 1H), 4.28-4.24 (m, 1H), 3.80 (td,  $J = 11.6, 2.4$  Hz, 1H), 2.83 (qd,  $J = 12.0, 4.1$  Hz, 1H), 2.19-2.16 (m, 1H), 1.98 (d,  $J = 12.8$  Hz, 1H), 1.84-1.71 (m, 3H);  $^{13}\text{C NMR}$  (100 MHz,  $\text{CDCl}_3$ )  $\delta$  151.74, 150.54, 148.36, 137.86, 137.70, 131.39, 130.24, 127.11, 125.35, 122.21, 117.84, 94.78, 83.81, 80.56, 69.45, 29.93, 25.00, 23.14; HRMS (FAB) found 509.9838 [calcd for  $\text{C}_{18}\text{H}_{14}\text{ClIN}_5\text{O}_3^+(\text{M}+\text{H})^+$  509.9830].

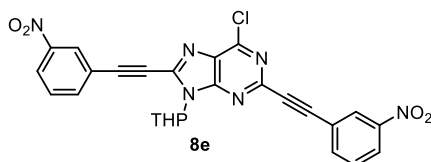

### 6-Chloro-2,8-bis((3-nitrophenyl)ethynyl)-9-(tetrahydro-2H-pyran-2-yl)-9H-purine (8e)

Compound **8e** was prepared from **1a** (100 mg, 0.20 mmol) as a white solid (11 mg, 10%) by following general procedure **(A)** using 3-nitrophenylacetylene (0.027 mL, 0.22 mmol). (Reaction time: 3.5 h).  $R_f = 0.14$  (silica gel, hexane/EtOAc, 2/1);  $^1\text{H NMR}$  (400 MHz,  $\text{CDCl}_3$ )  $\delta$  8.56 (t,  $J = 1.8$  Hz, 1H), 8.52 (t,  $J = 1.8$  Hz, 1H), 8.38-8.35 (m, 1H), 8.30-8.28 (m, 1H), 8.01-7.98 (m, 2H), 7.68 (t,  $J = 8.0$  Hz, 1H), 7.61 (t,  $J = 8.0$  Hz, 1H), 6.00 (dd,  $J = 11.3, 2.1$  Hz, 1H), 4.32-4.28 (m, 1H), 3.83 (td,  $J = 11.7, 2.2$  Hz, 1H), 2.92 (qd,  $J = 12.3, 4.1$  Hz, 1H), 2.22-2.17 (m, 1H), 2.05-2.00 (m, 2H), 1.89-1.73 (m, 2H);  $^{13}\text{C NMR}$  (100 MHz,  $\text{CDCl}_3$ )  $\delta$  151.30, 151.25, 148.39, 148.28, 145.88, 138.86, 138.19, 137.88, 131.03, 130.27, 129.82, 127.59, 127.15, 125.38, 124.58, 123.24, 122.27, 95.24, 89.66, 85.42, 83.91, 80.77, 69.58, 30.07, 25.05, 23.24; HRMS (FAB) found 445.0451 [calcd for  $\text{C}_{21}\text{H}_{10}\text{ClN}_6\text{O}_4^+(\text{M}-\text{THP}+\text{H})^+$  445.0452].

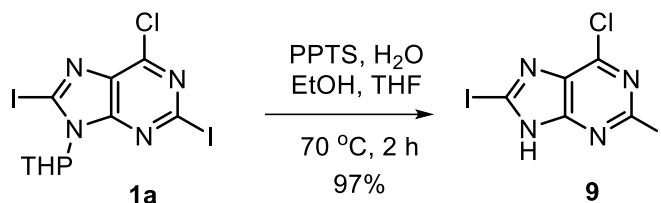

### 6-Chloro-2,8-diiodo-9H-purine (**9**)

To a solution of **1a** (4.1 g, 8.36 mmol, 1 equiv) in EtOH (25 mL) and THF (25 mL) was added Pyridinium *p*-toluenesulfonate (260 mg, 1.03 mmol, 0.12 equiv) in H<sub>2</sub>O (5 mL) at room temperature. After being stirred for 2 h at 70 °C, the reaction mixture was cooled to room temperature, and the solvent was evaporated. Then, the residue was purified by flash silica gel chromatography (silica gel, hexane/THF, 3/1) to give **9** (3.30 g, 97%) as white solid.  $R_f = 0.25$  (silica gel, hexane/EtOAc, 2/1); <sup>13</sup>C NMR (200 MHz, DMSO-*d*<sub>6</sub>) δ 155.98, 145.59, 133.00, 117.62, 108.17; HRMS (ESI) found 406.8054 [calcd for C<sub>5</sub>H<sub>2</sub>ClI<sub>2</sub>N<sub>4</sub><sup>+</sup>(M+H)<sup>+</sup> 406.8052].

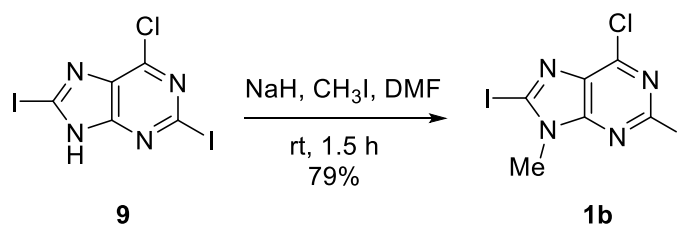

### 6-Chloro-2,8-diiodo-9-methyl-9H-purine (**1b**)

To a solution of **9** (1.0 g, 2.46 mmol, 1 equiv) in DMF (15 mL) was added NaH (60% dispersion in paraffin oil, 108 mg, 2.71 mmol, 1.1 equiv) and stirred for 5 min at room temperature under N<sub>2</sub>. To the above reaction mixture was added CH<sub>3</sub>I (0.17 mL, 2.71 mmol, 1.1 equiv) and stirred for 1.5 h at room temperature under N<sub>2</sub>, then the reaction mixture was cooled to 0 °C, and quenched slowly by saturated NH<sub>4</sub>Cl. The aqueous layer was extracted by EtOAc, then the combined organic layers were dried over MgSO<sub>4</sub>, filtered and evaporated. The residue was purified by flash silica gel chromatography. (silica gel, hexane/EtOAc, 2/1) to give **1b** (821 mg, 79%) as white solid.  $R_f = 0.50$  (silica gel, hexane/EtOAc, 1/1); <sup>1</sup>H NMR (400 MHz, CDCl<sub>3</sub>) δ 3.82 (s, 3H); <sup>13</sup>C NMR (100 MHz, DMSO-*d*<sub>6</sub>) δ 153.89, 146.12, 132.91, 117.92, 115.41, 32.94;

HRMS (FAB) found 420.8226 [calcd for  $C_6H_4ClI_2N_4^+(M+H)^+$  420.8214].

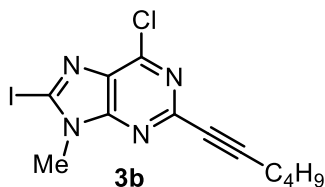

### 6-Chloro-2-(hex-1-yn-1-yl)-8-iodo-9-methyl-9H-purine (**3b**)

**3b** was prepared from **1b** (84 mg, 0.20 mmol) as a white solid (30 mg, 40%) by following general procedure (**A**) using 1-hexyne (0.025 mL, 0.22 mmol). (Reaction time: 0.5 h).  $R_f = 0.42$  (silica gel, hexane/EtOAc, 2/1);  $^1H$  NMR (400 MHz,  $CDCl_3$ )  $\delta$  3.83 (s, 3H), 2.49 (t,  $J = 7.4$  Hz, 2H), 1.70-1.62 (m, 2H), 1.52-1.45 (m, 2H), 0.95 (t,  $J = 7.4$  Hz, 3H);  $^{13}C$  NMR (100 MHz,  $DMSO-d_6$ )  $\delta$  153.05, 146.57, 144.18, 132.08, 115.76, 89.89, 79.66, 32.78, 29.62, 21.49, 17.94, 13.44; HRMS (ESI) found 374.9871 [calcd for  $C_{12}H_{13}ClIN_4^+(M+H)^+$  374.9868].

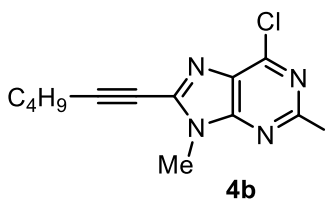

### 6-Chloro-8-(hex-1-yn-1-yl)-2-iodo-9-methyl-9H-purine (**4b**)

**3b** was prepared from **1b** (84 mg, 0.20 mmol) as a white solid (24 mg, 32%) by following general procedure (**B**) using 1-hexyne (0.025 mL, 0.22 mmol). (Reaction time: 0.5 h).  $R_f = 0.28$  (silica gel, hexane/EtOAc, 8/1);  $^1H$  NMR (400 MHz,  $CDCl_3$ )  $\delta$  3.85 (s, 3H), 2.57 (t,  $J = 7.0$  Hz, 2H), 1.72-1.64 (m, 2H), 1.55-1.47 (m, 2H), 0.97 (t,  $J = 7.3$  Hz, 3H);  $^{13}C$  NMR (100 MHz,  $DMSO-d_6$ )  $\delta$  152.84, 147.62, 140.16, 130.47, 118.45, 101.90, 69.56, 30.20, 29.30, 21.45, 18.37, 13.42; HRMS (ESI) found 374.9867 [calcd for  $C_{12}H_{13}ClIN_4^+(M+H)^+$  374.9868].

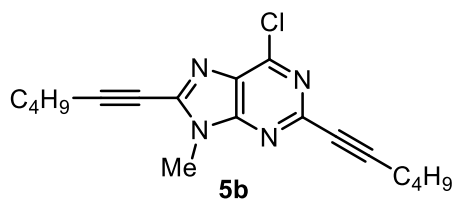

### 6-Chloro-2,8-di(hex-1-yn-1-yl)-9-methyl-9H-purine (**5b**)

**5b** was prepared from **1b** (84 mg, 0.20 mmol) as a white solid (20 mg, 31%) by following general procedure (**A**) using 1-hexyne (0.025 mL, 0.22 mmol). (Reaction time: 0.5 h).  $R_f = 0.21$  (silica gel, hexane/EtOAc, 8/1);  $^1\text{H NMR}$  (400 MHz,  $\text{CDCl}_3$ )  $\delta$  3.87 (s, 3H), 2.56 (t,  $J = 7.1$  Hz, 2H), 2.49 (t,  $J = 7.1$  Hz, 2H), 1.71-1.62 (m, 4H), 1.56-1.45 (m, 4H), 0.97 (t,  $J = 7.2$  Hz, 3H), 0.94 (t,  $J = 7.2$  Hz, 3H);  $^{13}\text{C NMR}$  (100 MHz,  $\text{DMSO-}d_6$ )  $\delta$  151.95, 147.96, 144.83, 140.78, 129.64, 101.89, 90.07, 79.75, 69.72, 30.02, 29.64, 29.33, 21.49, 21.45, 18.38, 17.96, 13.43, 13.41; HRMS (ESI) found 329.1526 [calcd for  $\text{C}_{18}\text{H}_{22}\text{ClN}_4^+(\text{M}+\text{H})^+$  329.1528].

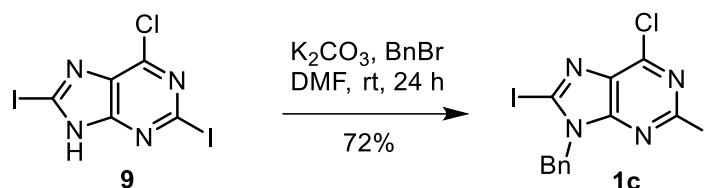

### 9-Benzyl-6-chloro-2,8-diiodo-9H-purine (**1c**)

To a solution of **9** (987 mg, 2.42 mmol, 1 equiv) in DMF (10 mL) were added  $\text{K}_2\text{CO}_3$  (369 mg, 2.67 mmol, 1.1 equiv) and BnBr (0.31 mL, 2.67 mmol, 1.1 equiv) at room temperature under  $\text{N}_2$ . After being stirred for 24 h at room temperature under  $\text{N}_2$ , the reaction mixture was quenched by  $\text{H}_2\text{O}$ , extracted by  $\text{CH}_2\text{Cl}_2$ . The combined organic layers were dried with  $\text{MgSO}_4$ , filtered and evaporated. The residue was purified by flash silica gel chromatography (silica gel, hexane/EtOAc, 1/1) to give **1c** (868 mg, 72%) as a white solid.  $R_f = 0.30$  (silica gel, hexane/EtOAc, 4/1);  $^1\text{H NMR}$  (400 MHz,  $\text{CDCl}_3$ )  $\delta$  7.38-7.30 (m, 5H), 5.42 (s, 2H);  $^{13}\text{C NMR}$  (100 MHz,  $\text{CDCl}_3$ )  $\delta$  153.76, 148.70, 134.05, 133.83, 129.19, 128.88, 128.11, 117.04, 108.21, 49.87; HRMS (ESI) found 496.8529 [calcd for  $\text{C}_{12}\text{H}_8\text{ClI}_2\text{N}_4^+(\text{M}+\text{H})^+$  496.8521].

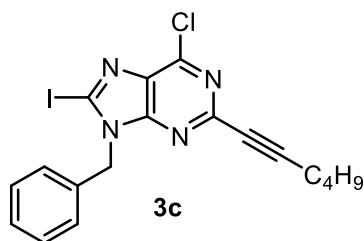

### 9-Benzyl-6-chloro-2-(hex-1-yn-1-yl)-8-iodo-9H-purine (**3c**)

**3c** was prepared from **1c** (100 mg, 0.20 mmol) as a white solid (32 mg, 35%) by following general procedure (A) using 1-hexyne (0.025 mL, 0.22 mmol). (Reaction time: 4 h).  $R_f = 0.20$  (silica gel, hexane/EtOAc, 4/1);  $^1\text{H NMR}$  (400 MHz,  $\text{CDCl}_3$ )  $\delta$  7.33-7.27 (m, 5H), 5.45 (s, 2H), 2.49 (t,  $J = 7.1$  Hz, 2H), 1.69-1.61 (m, 2H), 1.54-1.45 (m, 2H), 0.94 (t,  $J = 7.1$  Hz, 3H);  $^{13}\text{C NMR}$  (100 MHz,  $\text{CDCl}_3$ )  $\delta$  153.20, 149.23, 146.24, 134.38, 132.81, 129.09, 128.66, 127.92, 108.50, 91.52, 79.53, 49.54, 30.17, 22.29, 19.27, 13.73; HRMS (ESI) found 451.0180 [calcd for  $\text{C}_{16}\text{H}_{19}\text{ClIN}_4\text{O}^+(\text{M}+\text{H})^+$  451.0181].

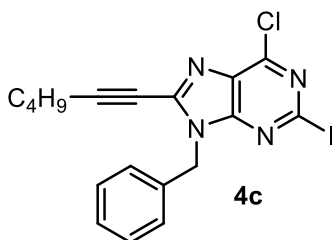

### 9-Benzyl-6-chloro-8-(hex-1-yn-1-yl)-2-iodo-9H-purine (**4c**)

**4c** was prepared from **1c** (100 mg, 0.20 mmol) as a white solid (32 mg, 35%) by following general procedure (B) using 1-hexyne (0.025 mL, 0.22 mmol). (Reaction time: 4 h).  $R_f = 0.53$  (silica gel, hexane/EtOAc, 4/1);  $^1\text{H NMR}$  (400 MHz,  $\text{CDCl}_3$ )  $\delta$  7.34-7.33 (m, 5H), 5.44 (s, 2H), 2.53 (t,  $J = 7.0$  Hz, 2H), 1.66-1.59 (m, 2H), 1.49-1.40 (m, 2H), 0.93 (t,  $J = 7.3$  Hz, 3H);  $^{13}\text{C NMR}$  (100 MHz,  $\text{CDCl}_3$ )  $\delta$  152.44, 149.76, 140.03, 134.82, 131.29, 129.09, 128.73, 128.20, 117.09, 102.39, 70.05, 47.72, 29.83, 22.15, 19.43, 13.63; HRMS (ESI) found 451.0180 [calcd for  $\text{C}_{18}\text{H}_{17}\text{ClIN}_4^+(\text{M}+\text{H})^+$  451.0181].

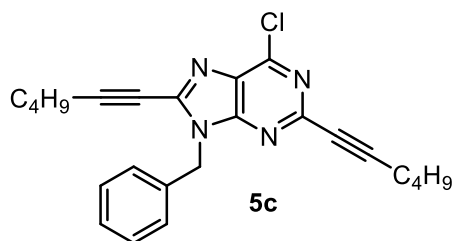

### 9-Benzyl-6-chloro-2,8-di(hex-1-yn-1-yl)-9H-purine (**5c**)

**5c** was prepared from **1c** (100 mg, 0.20 mmol) as a white solid (31 mg, 38%) by following general procedure (A) using 1-hexyne (0.025 mL, 0.22 mmol). (Reaction time: 4 h).  $R_f = 0.47$  (silica gel, hexane/EtOAc, 4/1);  $^1\text{H NMR}$  (400 MHz,  $\text{CDCl}_3$ )  $\delta$  7.32-7.30 (m, 5H), 5.48 (s, 2H), 2.51 (t,  $J = 7.0$  Hz, 2H), 2.49 (t,  $J = 7.3$  Hz, 2H), 1.70-1.57 (m, 4H), 1.54-1.38 (m, 4H), 0.94 (t,  $J = 7.6$  Hz, 3H), 0.92 (t,  $J = 7.2$  Hz, 3H);  $^{13}\text{C NMR}$  (100 MHz,  $\text{CDCl}_3$ )  $\delta$  151.78, 150.12, 146.51, 140.63, 135.15, 130.29, 128.95, 128.49, 128.00, 102.16, 91.17, 79.75, 70.27, 47.38, 30.21, 29.82, 22.30, 22.10, 19.39, 19.28, 13.74, 13.62; HRMS (ESI) found 405.1834 [calcd for  $\text{C}_{24}\text{H}_{25}\text{ClN}_4^+(\text{M}+\text{H})^+$  405.1841].

### References

- 1) Z. L. Niemeyer, A. Milo, D. P. Hickey and M. S. Sigman, Parameterization of phosphine ligands reveals mechanistic pathways and predicts reaction outcomes, *Nature Chemistry*, 2016, **8**, 610–617.
- 2) Dolomanov, O. V.; Bourhis, L. J.; Gildea, R. J.; Howard, J. A. K.; Puschmann, H. J. *Appl. Cryst.* 2009, **42**, 339-341.
- 3) Sheldrick, G. M. *Acta Cryst.* 2015, **A71**, 3-8.
- 4) Sheldrick, G. M. *Acta Cryst.* 2015, **C71**, 3-8.
- 5) A. D. Becke, Density-functional thermochemistry. III. The role of exact exchange, *J. Chem. Phys.* 1993, **98**, 5648-5652.
- 6) Y. Takano, K. Houk, Benchmarking the conductor-like polarizable continuum model (CPCM) for aqueous solvation free energies of neutral and ionic organic molecules, *J. Chem. Theory Comput.* 2005, **1**, 70–77.
- 7) P. C. Hariharan and J. A. Pople, The influence of polarization functions on molecular orbital hydrogenation energies, *Theor. Chim. Acta*, 1973, **28**, 213-222.



- 8) P. J. Hay, W. R. Wadt, Ab initio effective core potentials for molecular calculations. Potentials for K to Au including the outermost core orbitals, *J. Chem. Phys.* 1985, **82**, 299-310.
- 9) Gaussian 09, Revision *A.1*, M. J. Frisch, G. W. Trucks, H. B. Schlegel, G. E. Scuseria, M. A. Robb, J. R. Cheeseman, G. Scalmani, V. Barone, B. Mennucci, G. A. Petersson, H. Nakatsuji, M. Caricato, X. Li, H. P. Hratchian, A. F. Izmaylov, J. Bloino, G. Zheng, J. L. Sonnenberg, M. Hada, M. Ehara, K. Toyota, R. Fukuda, J. Hasegawa, M. Ishida, T. Nakajima, Y. Honda, O. Kitao, H. Nakai, T. Vreven, J. A. Montgomery, Jr., J. E. Peralta, F. Ogliaro, M. Bearpark, J. J. Heyd, E. Brothers, K. N. Kudin, V. N. Staroverov, R. Kobayashi, J. Normand, K. Raghavachari, A. Rendell, J. C. Burant, S. S. Iyengar, J. Tomasi, M. Cossi, N. Rega, J. M. Millam, M. Klene, J. E. Knox, J. B. Cross, V. Bakken, C. Adamo, J. Jaramillo, R. Gomperts, R. E. Stratmann, O. Yazyev, A. J. Austin, R. Cammi, C. Pomelli, J. W. Ochterski, R. L. Martin, K. Morokuma, V. G. Zakrzewski, G. A. Voth, P. Salvador, J. J. Dannenberg, S. Dapprich, A. D. Daniels, O. Farkas, J. B. Foresman, J. V. Ortiz, J. Cioslowski, and D. J. Fox, Gaussian, Inc., Wallingford CT, 2009.
- 10) Ibrahim, N.; Chevot, F.; Legraverend, M. *Tetrahedron Lett.* 2011, **52**, 305-307.

$^{13}\text{C}$  NMR (100 MHz, DMSO- $d_6$ ) of **1a**

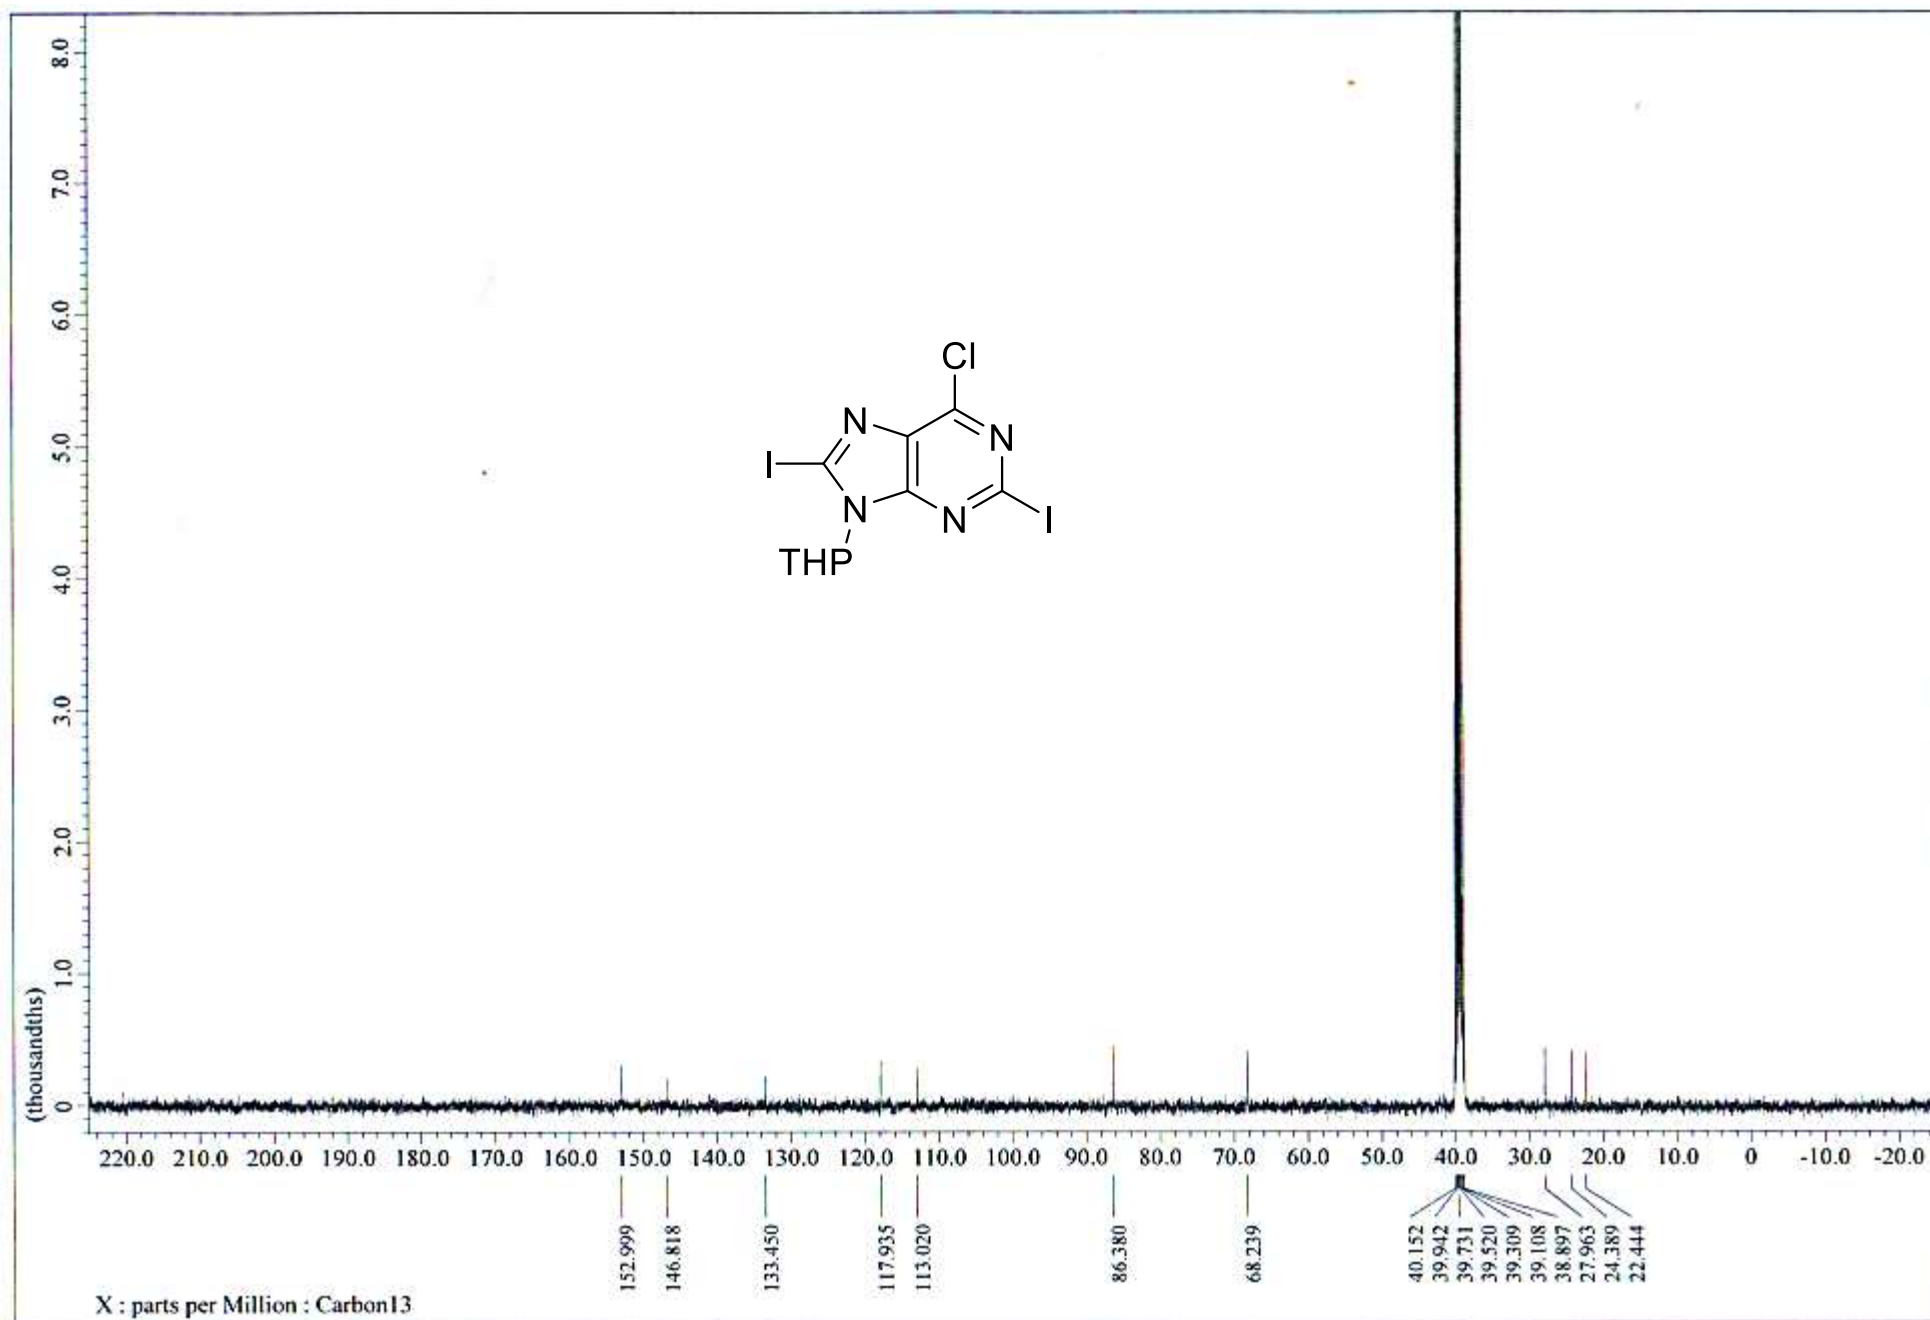

$^1\text{H}$  NMR (400 MHz,  $\text{DMSO-}d_6$ ) of **3a**

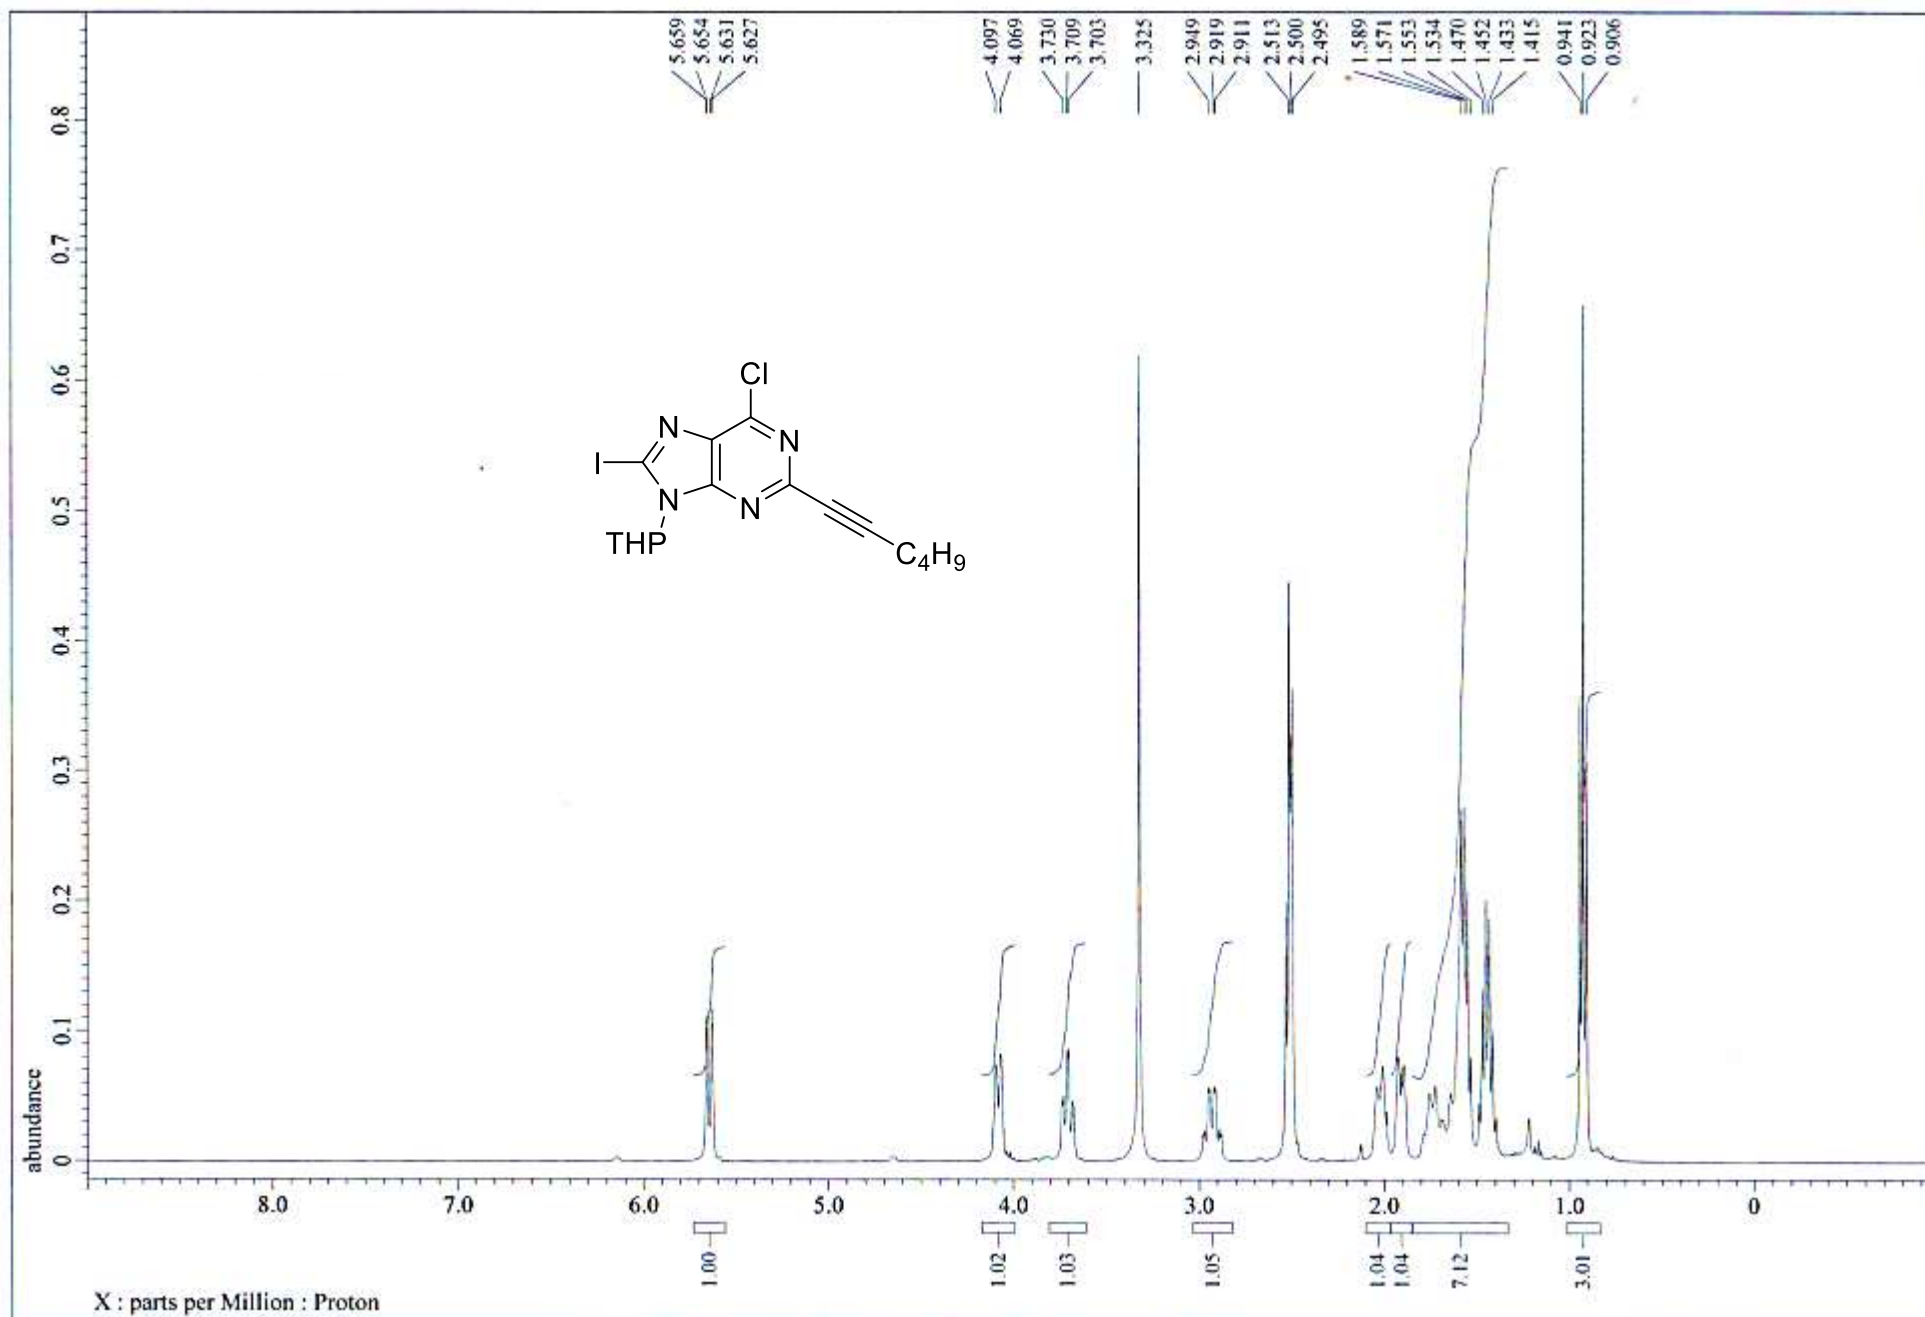

<sup>13</sup>C NMR (100 MHz, DMSO-d<sub>6</sub>) of 3a

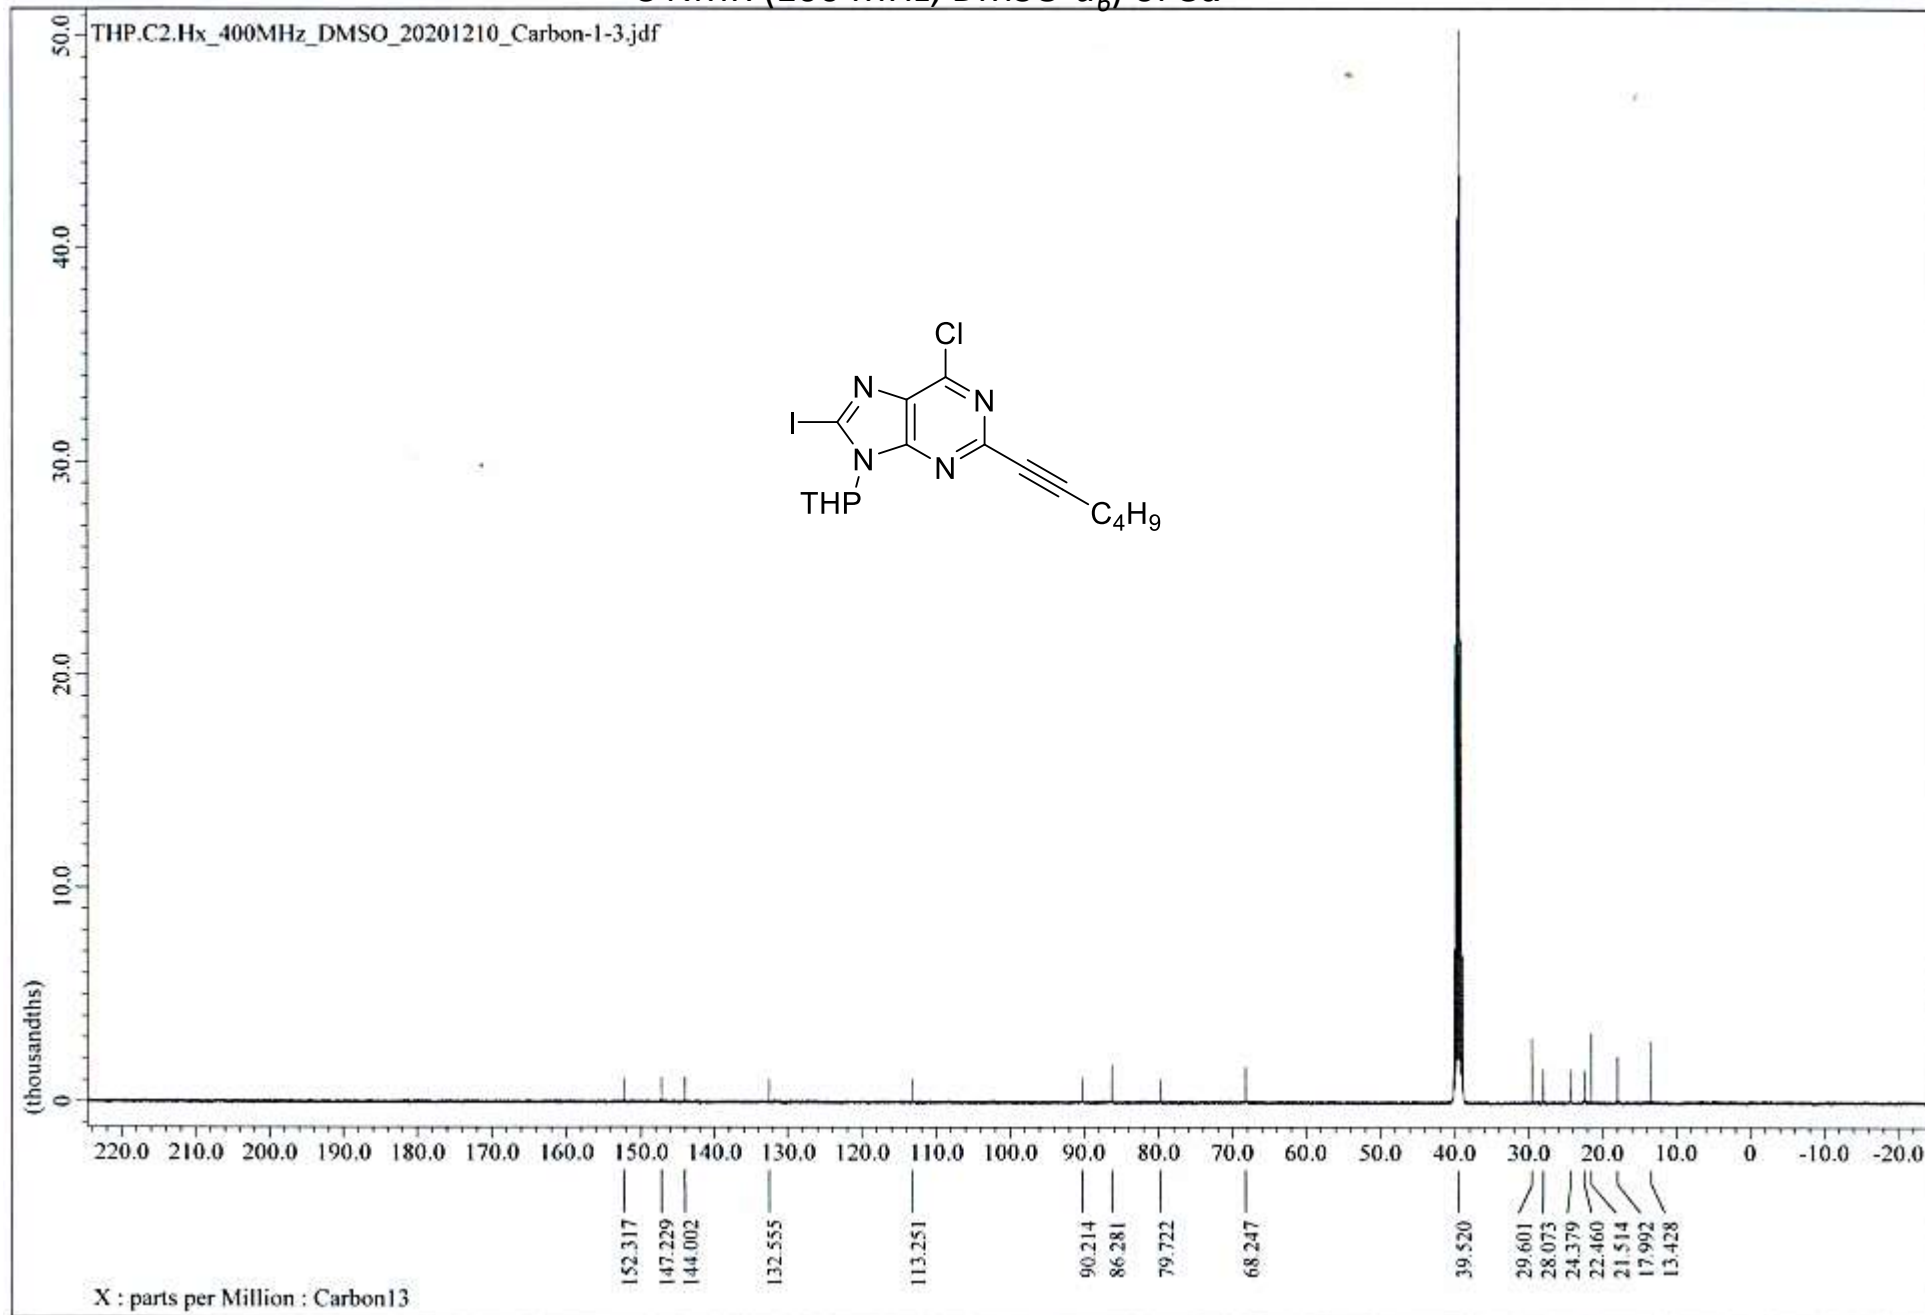

$^1\text{H}$  NMR (400 MHz,  $\text{DMSO-}d_6$ ) of **4a**

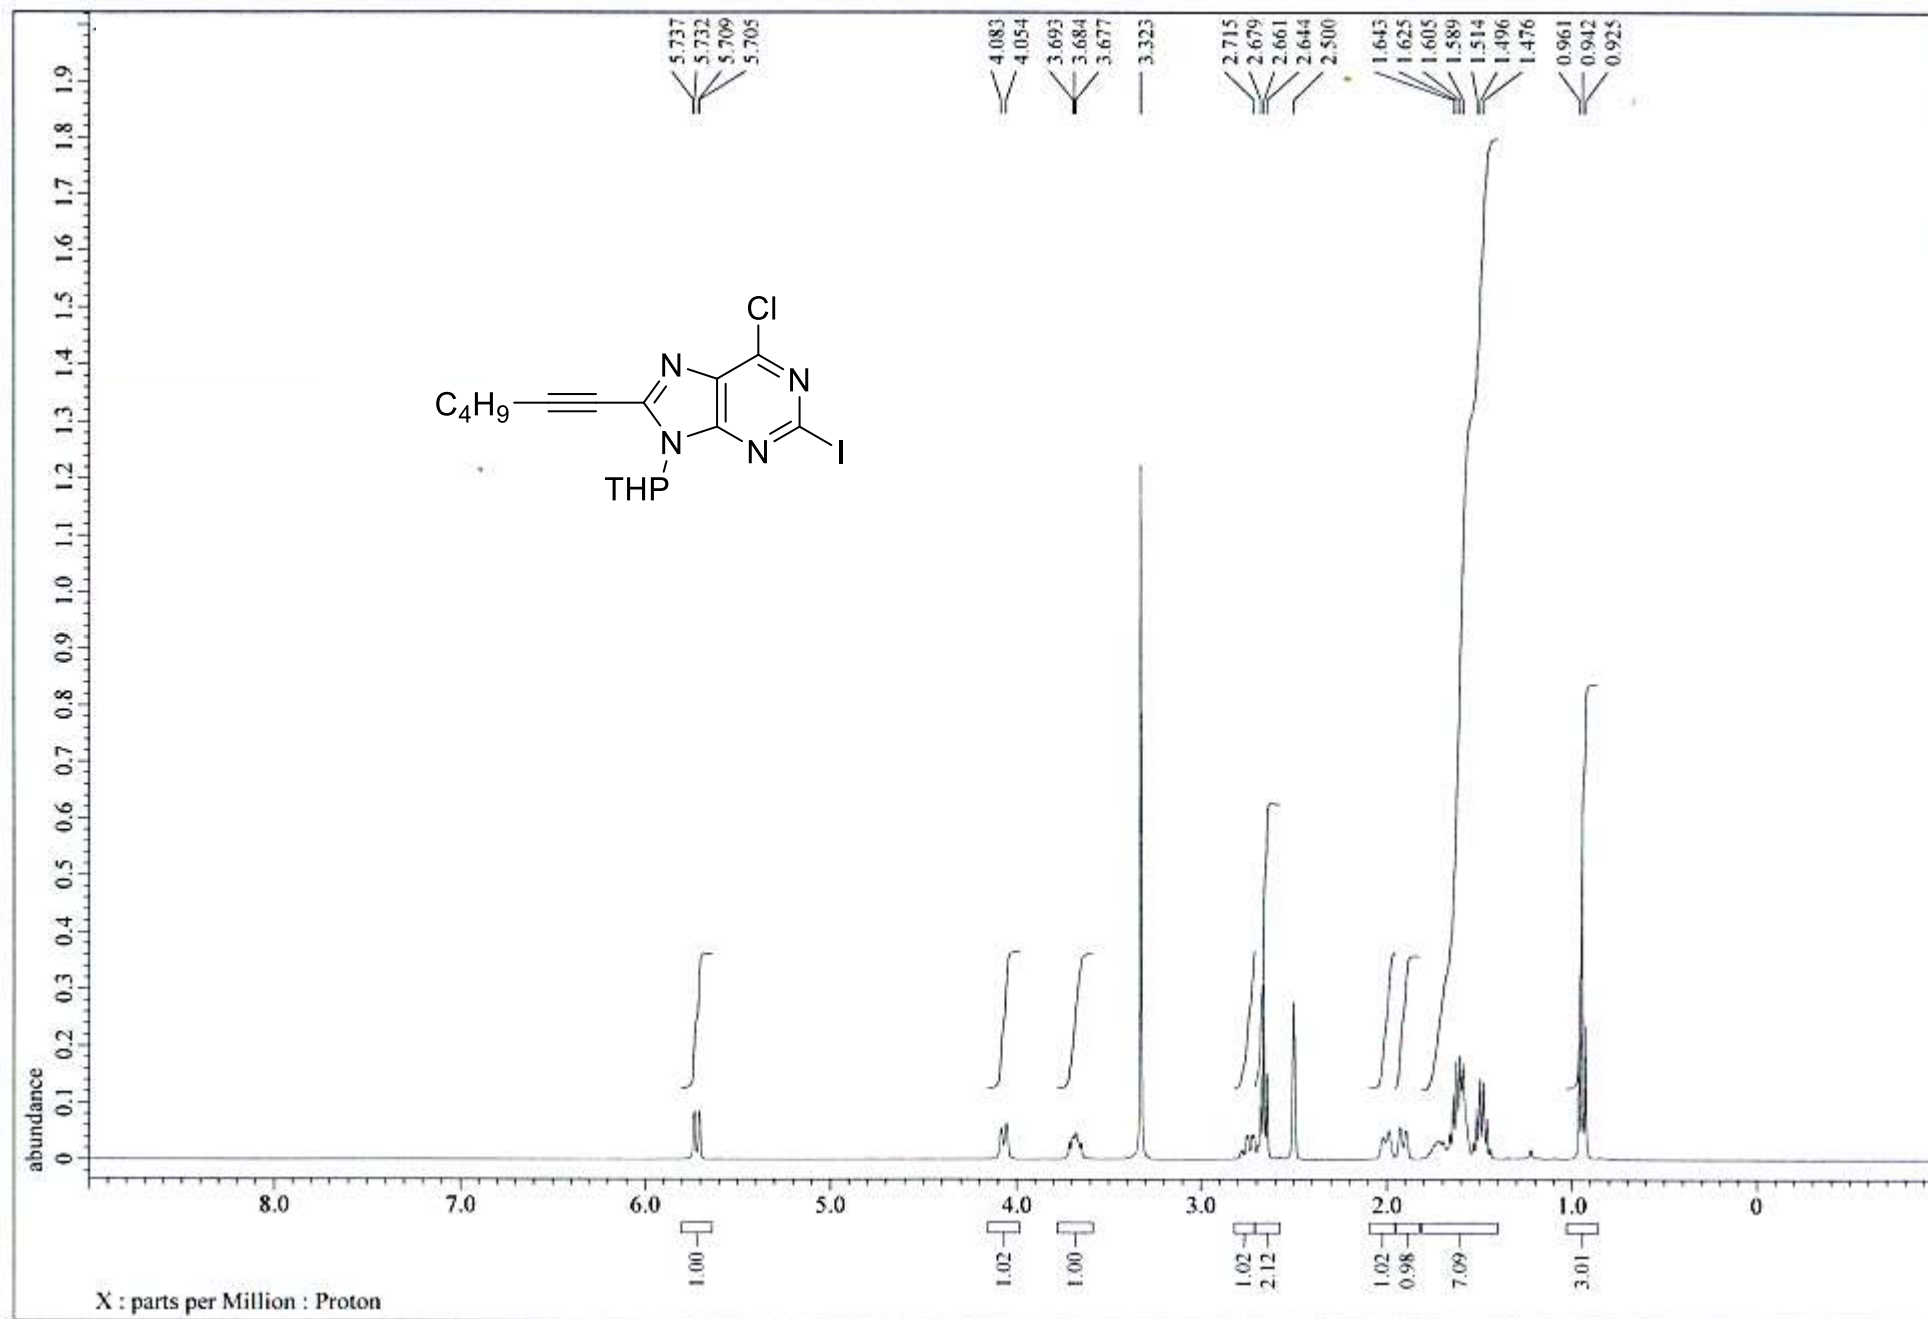

<sup>13</sup>C NMR (100 MHz, DMSO-d<sub>6</sub>) of 4a

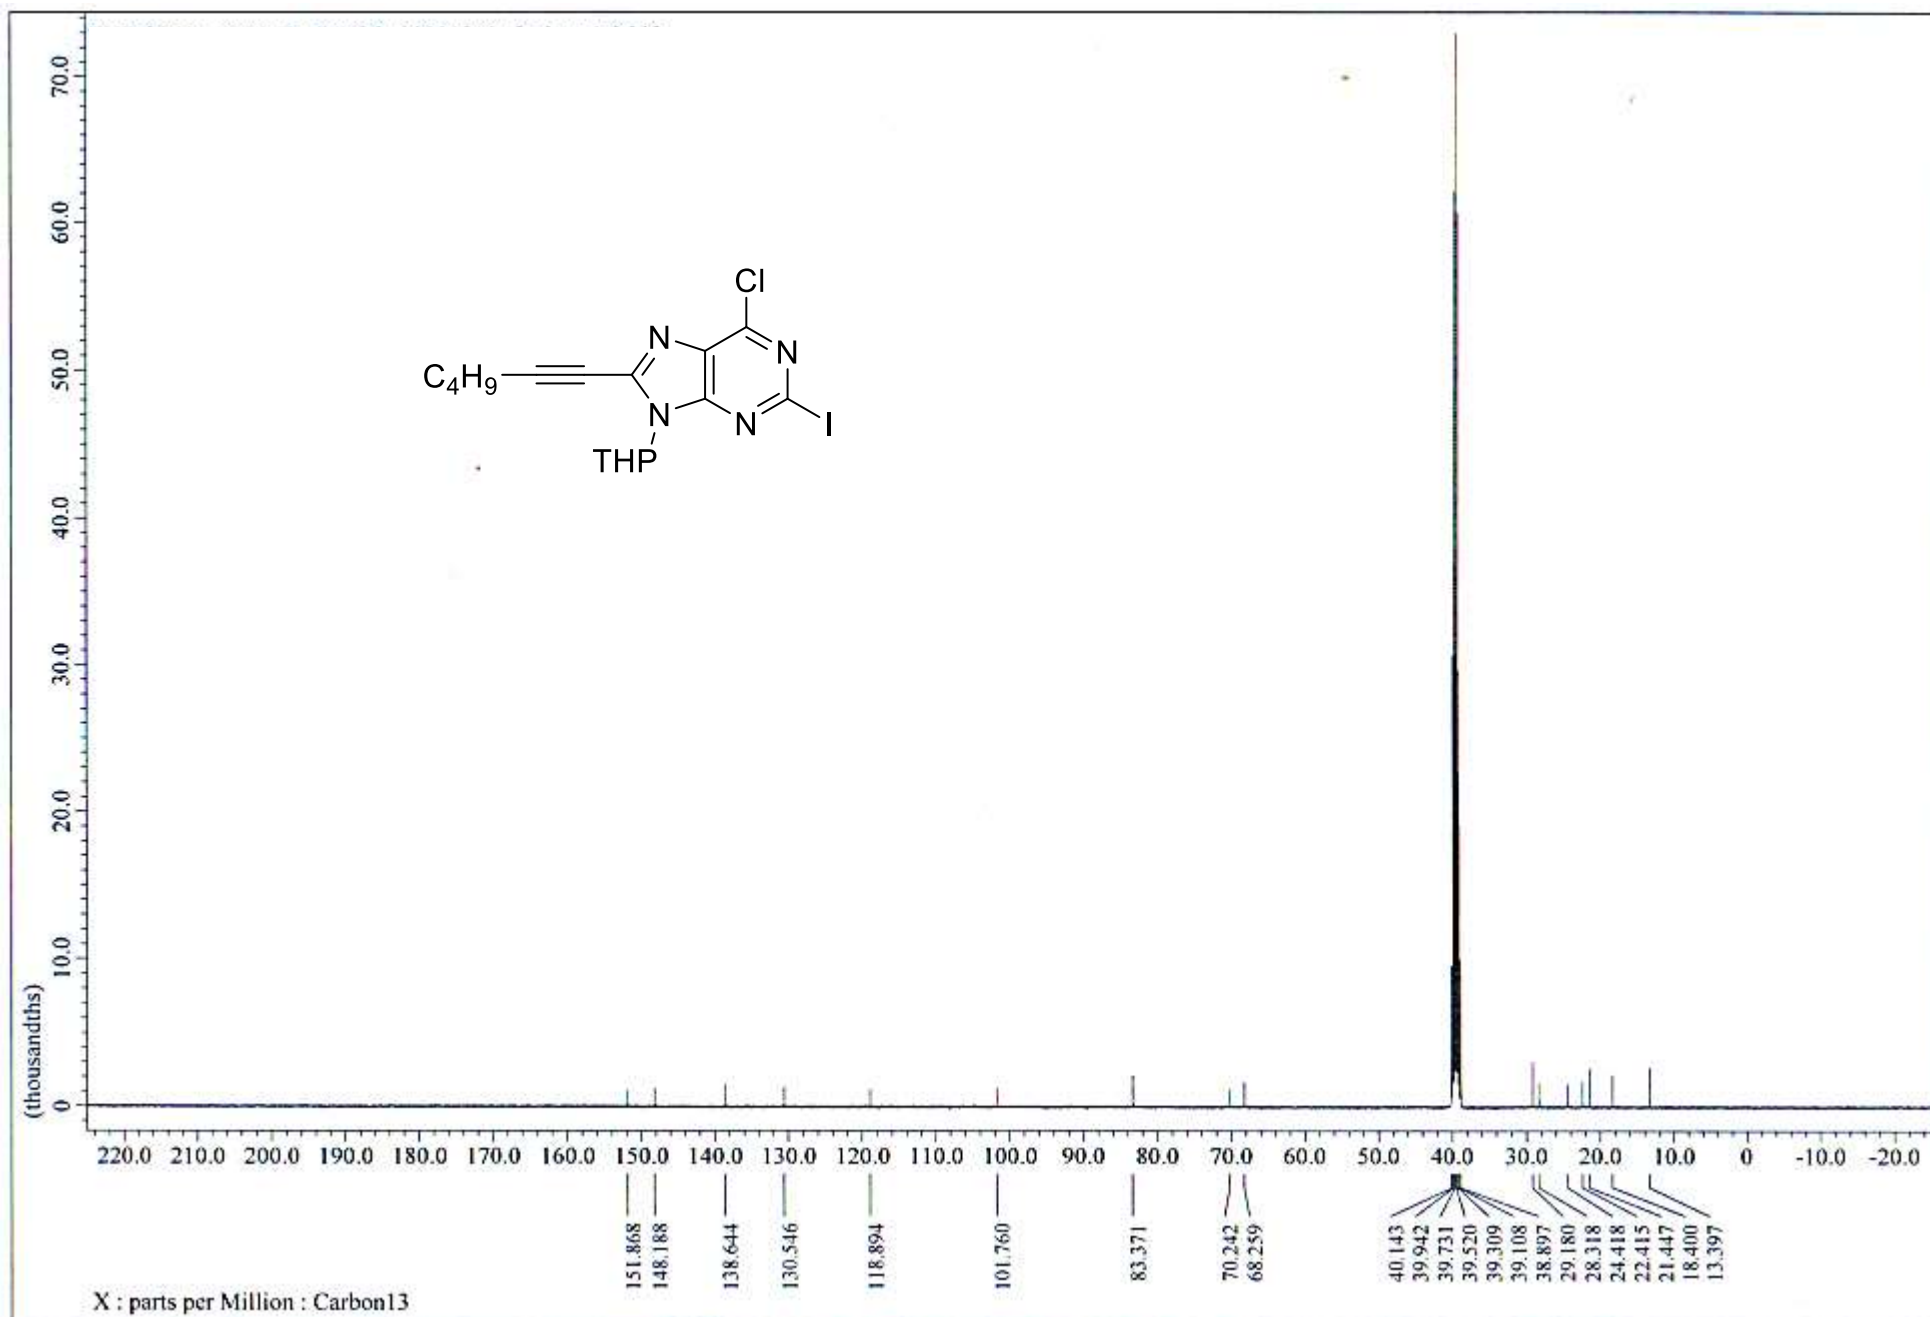

<sup>1</sup>H NMR (400 MHz, CDCl<sub>3</sub>) of 5a

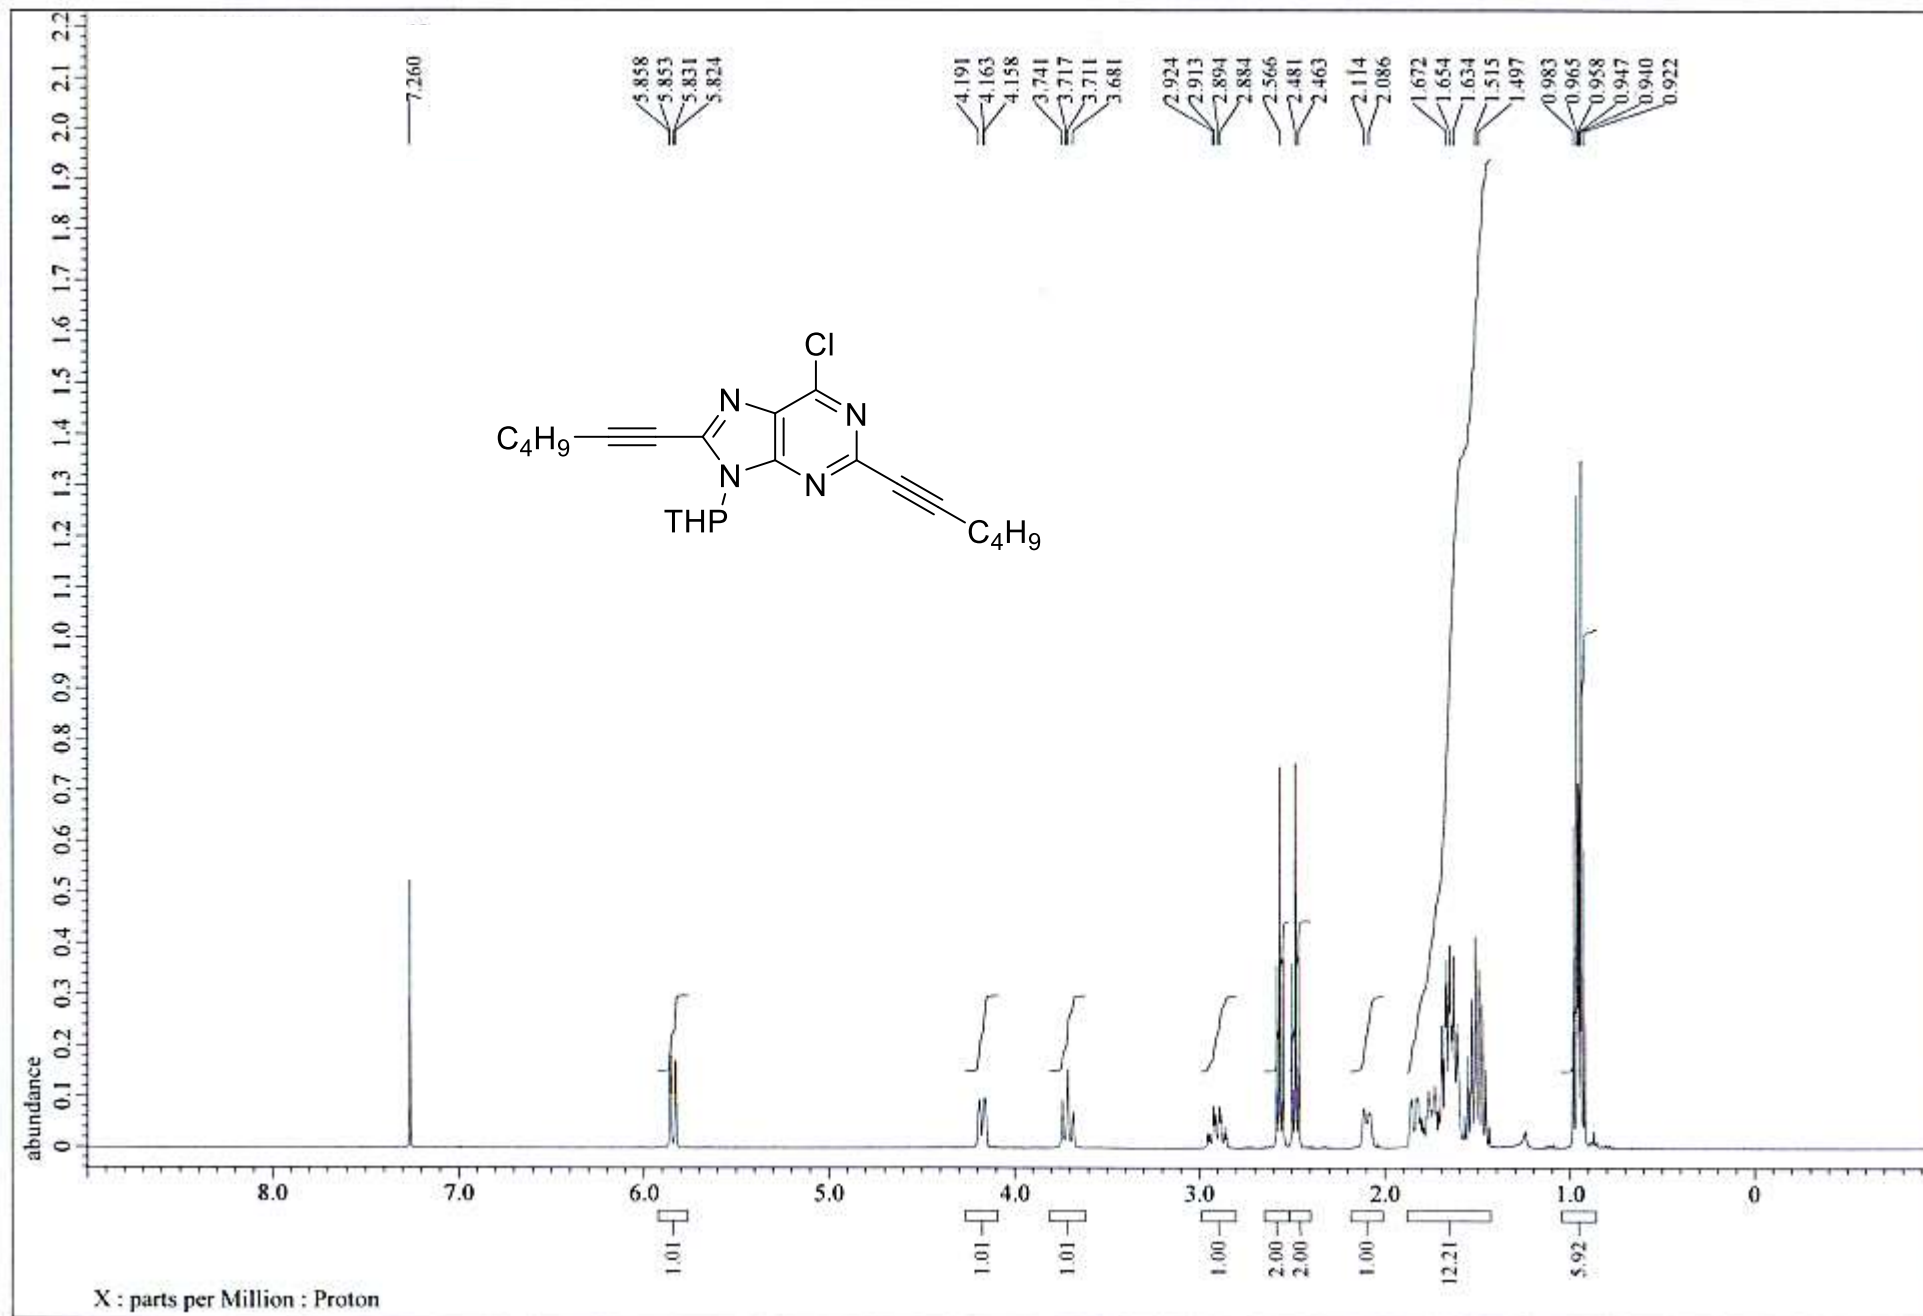

$^{13}\text{C}$  NMR (100 MHz,  $\text{DMSO-}d_6$ ) of **5a**

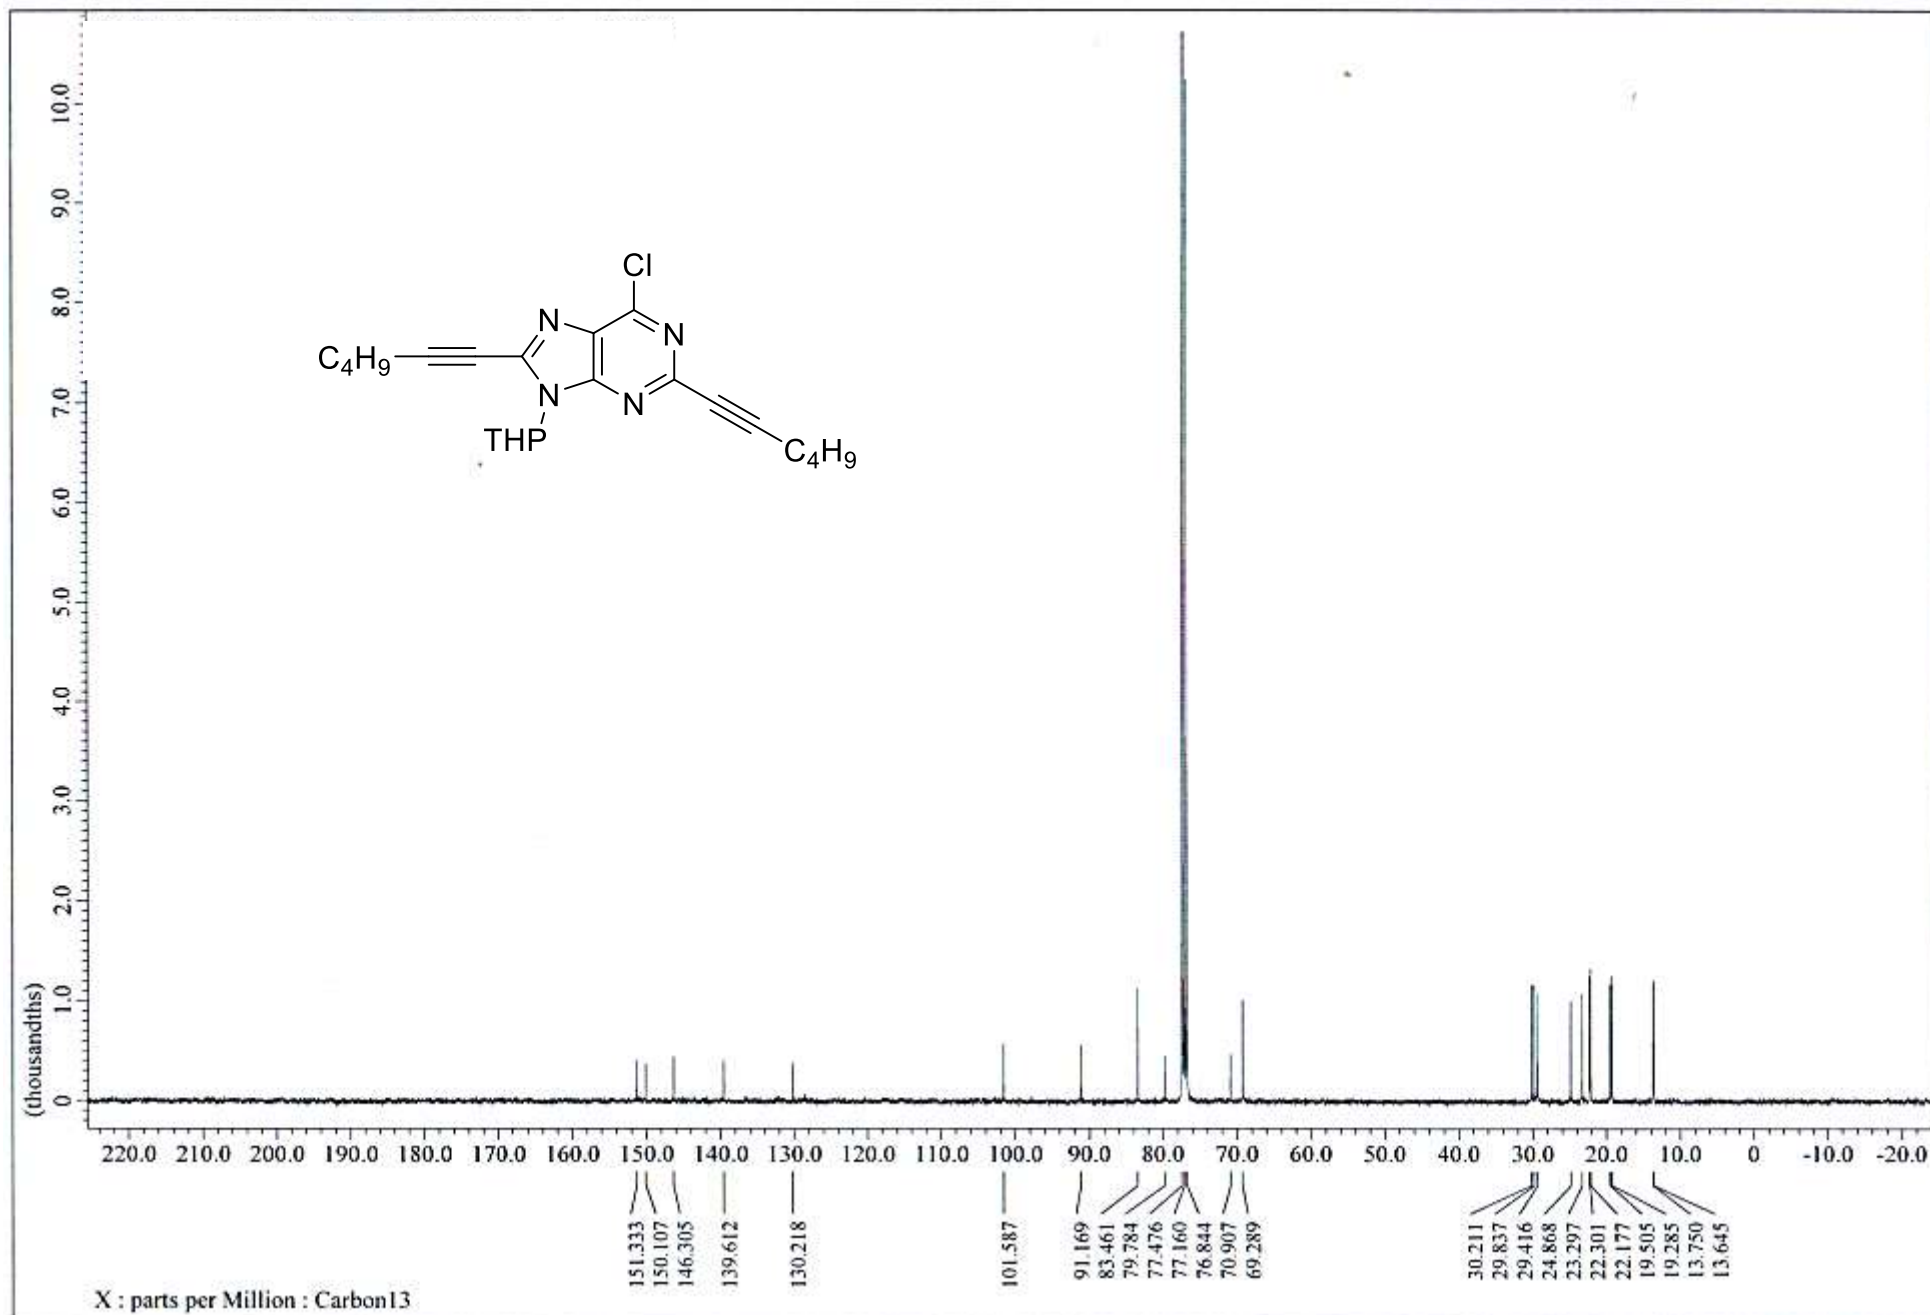



$^1\text{H}$  NMR (400 MHz,  $\text{CDCl}_3$ ) of **6a**

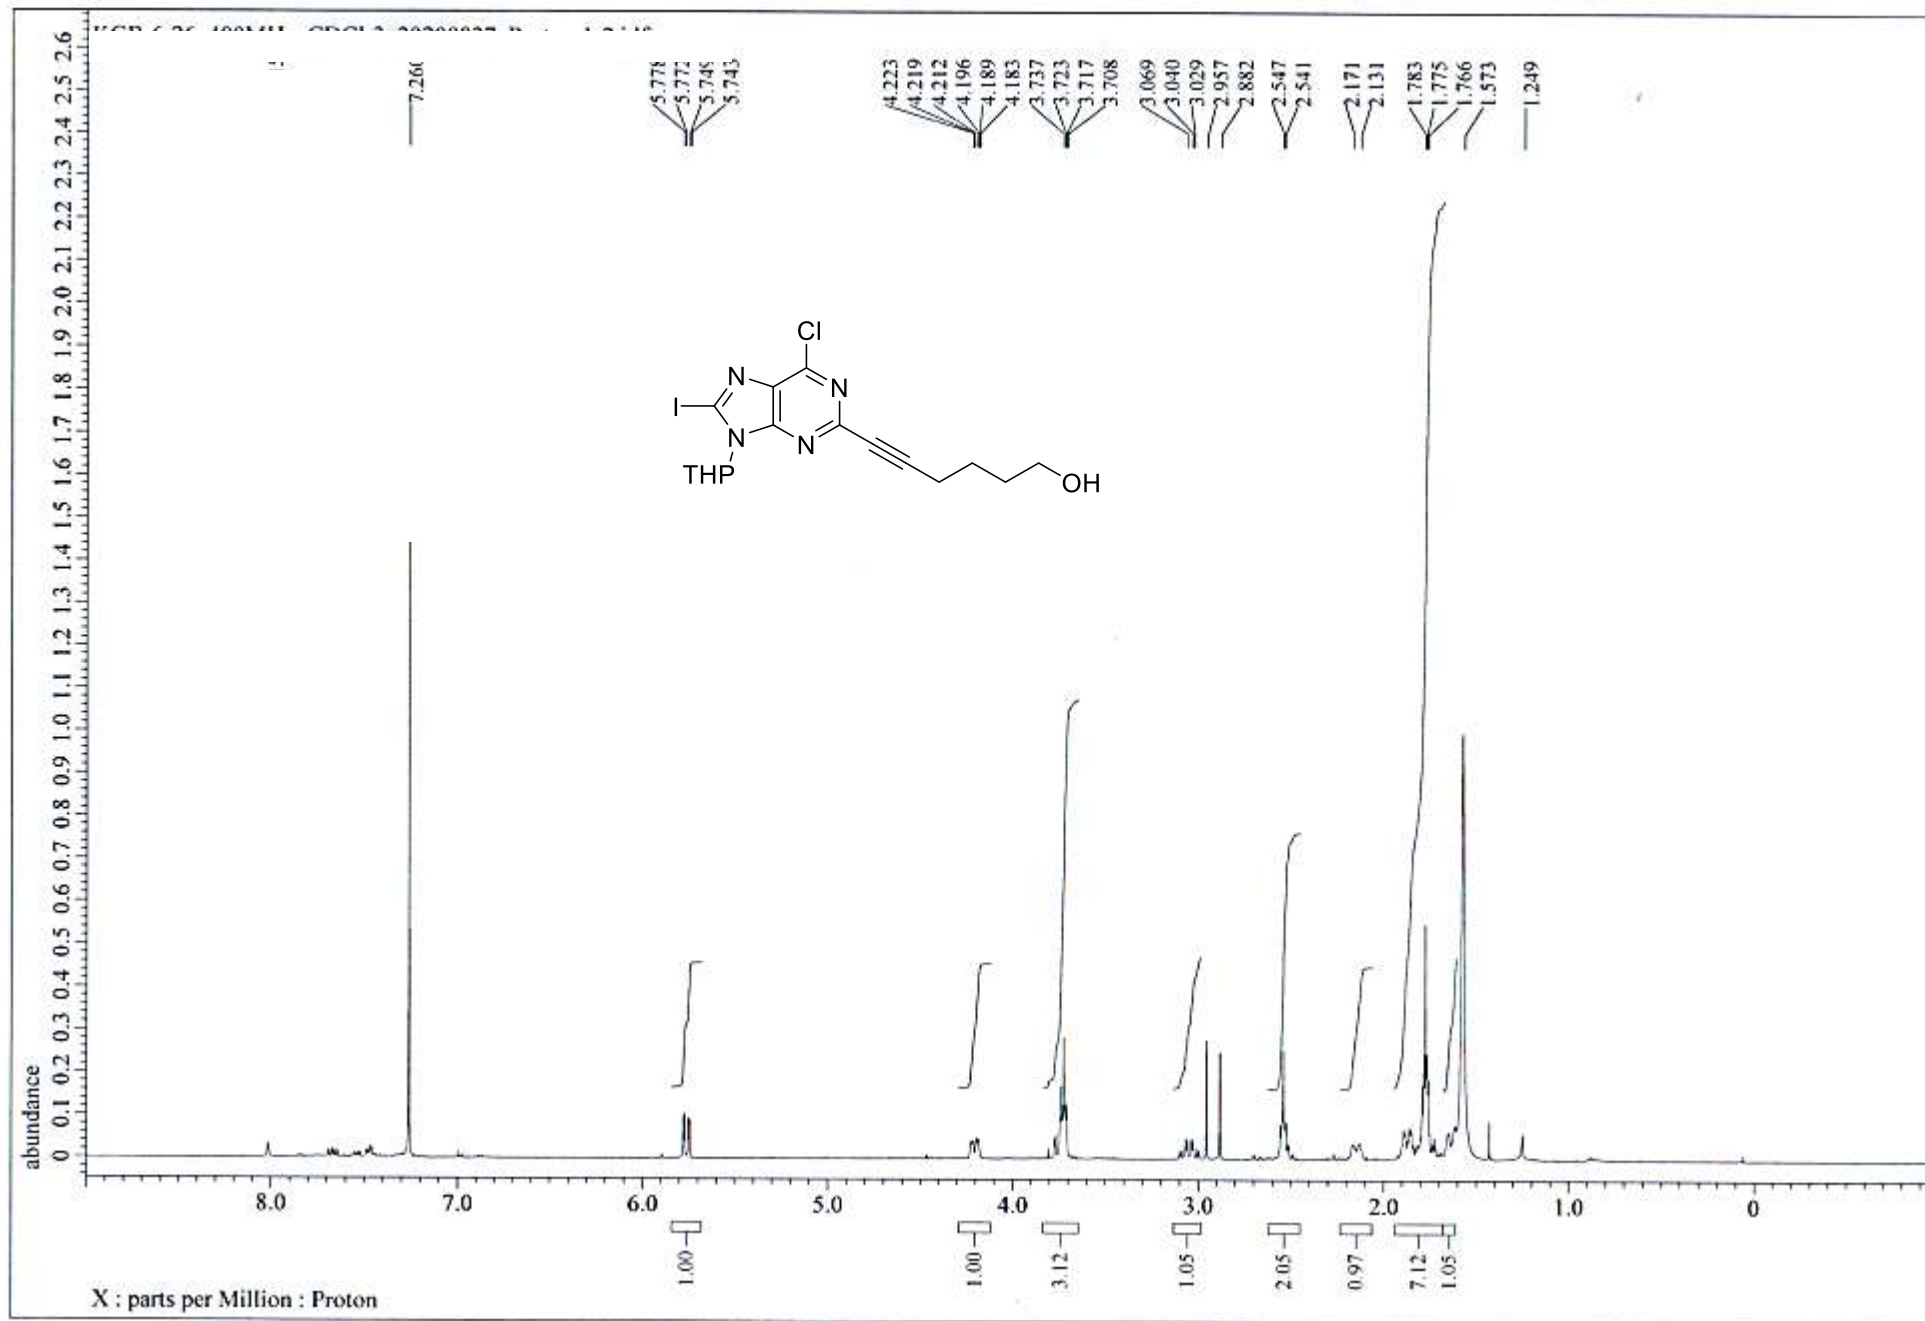

<sup>13</sup>C NMR (100 MHz, CDCl<sub>3</sub>) of **6a**

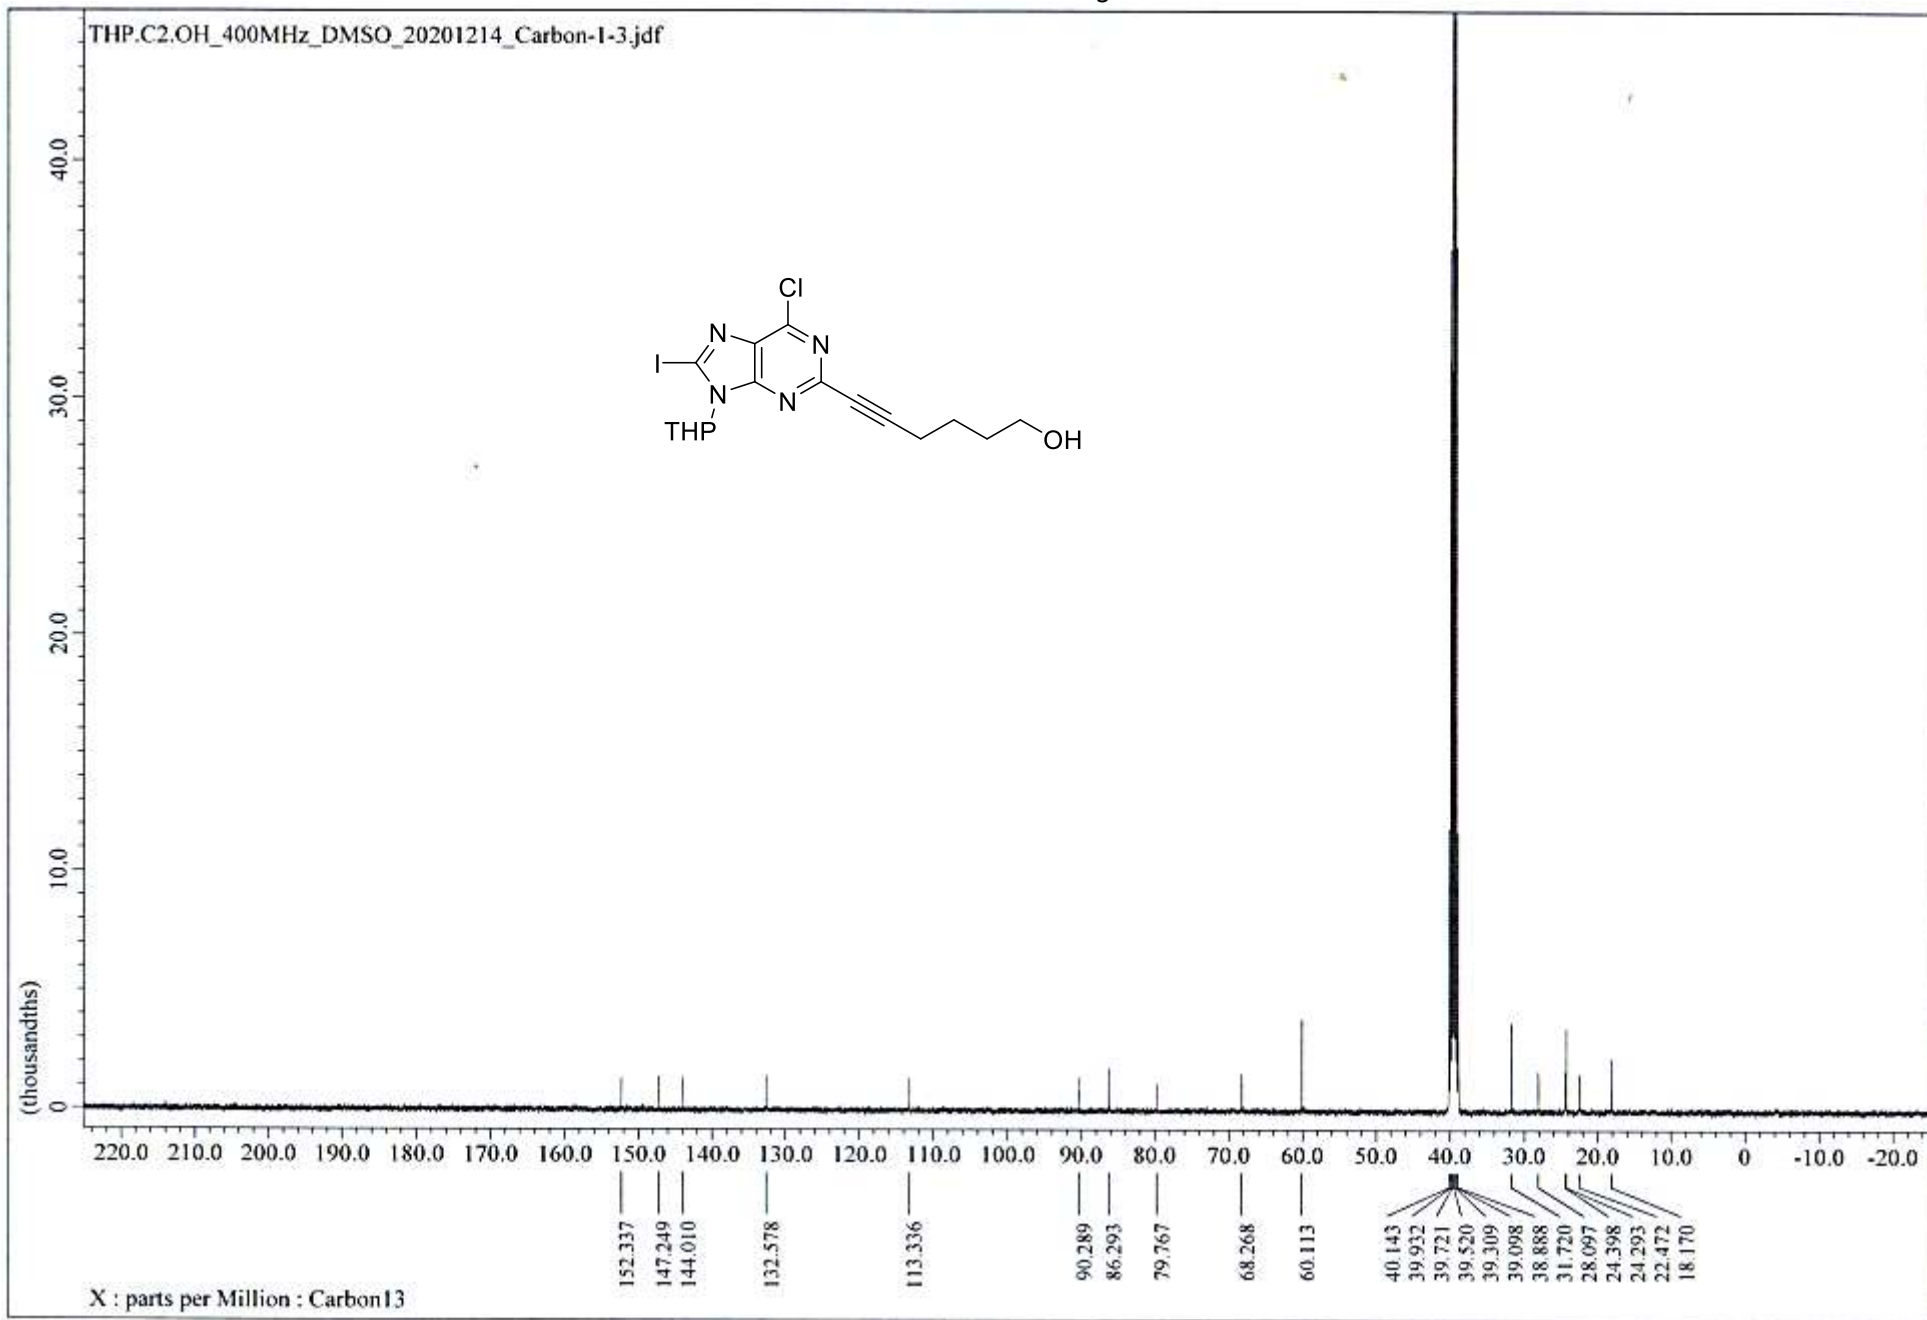

<sup>1</sup>H NMR (400 MHz, CDCl<sub>3</sub>) of **7a**

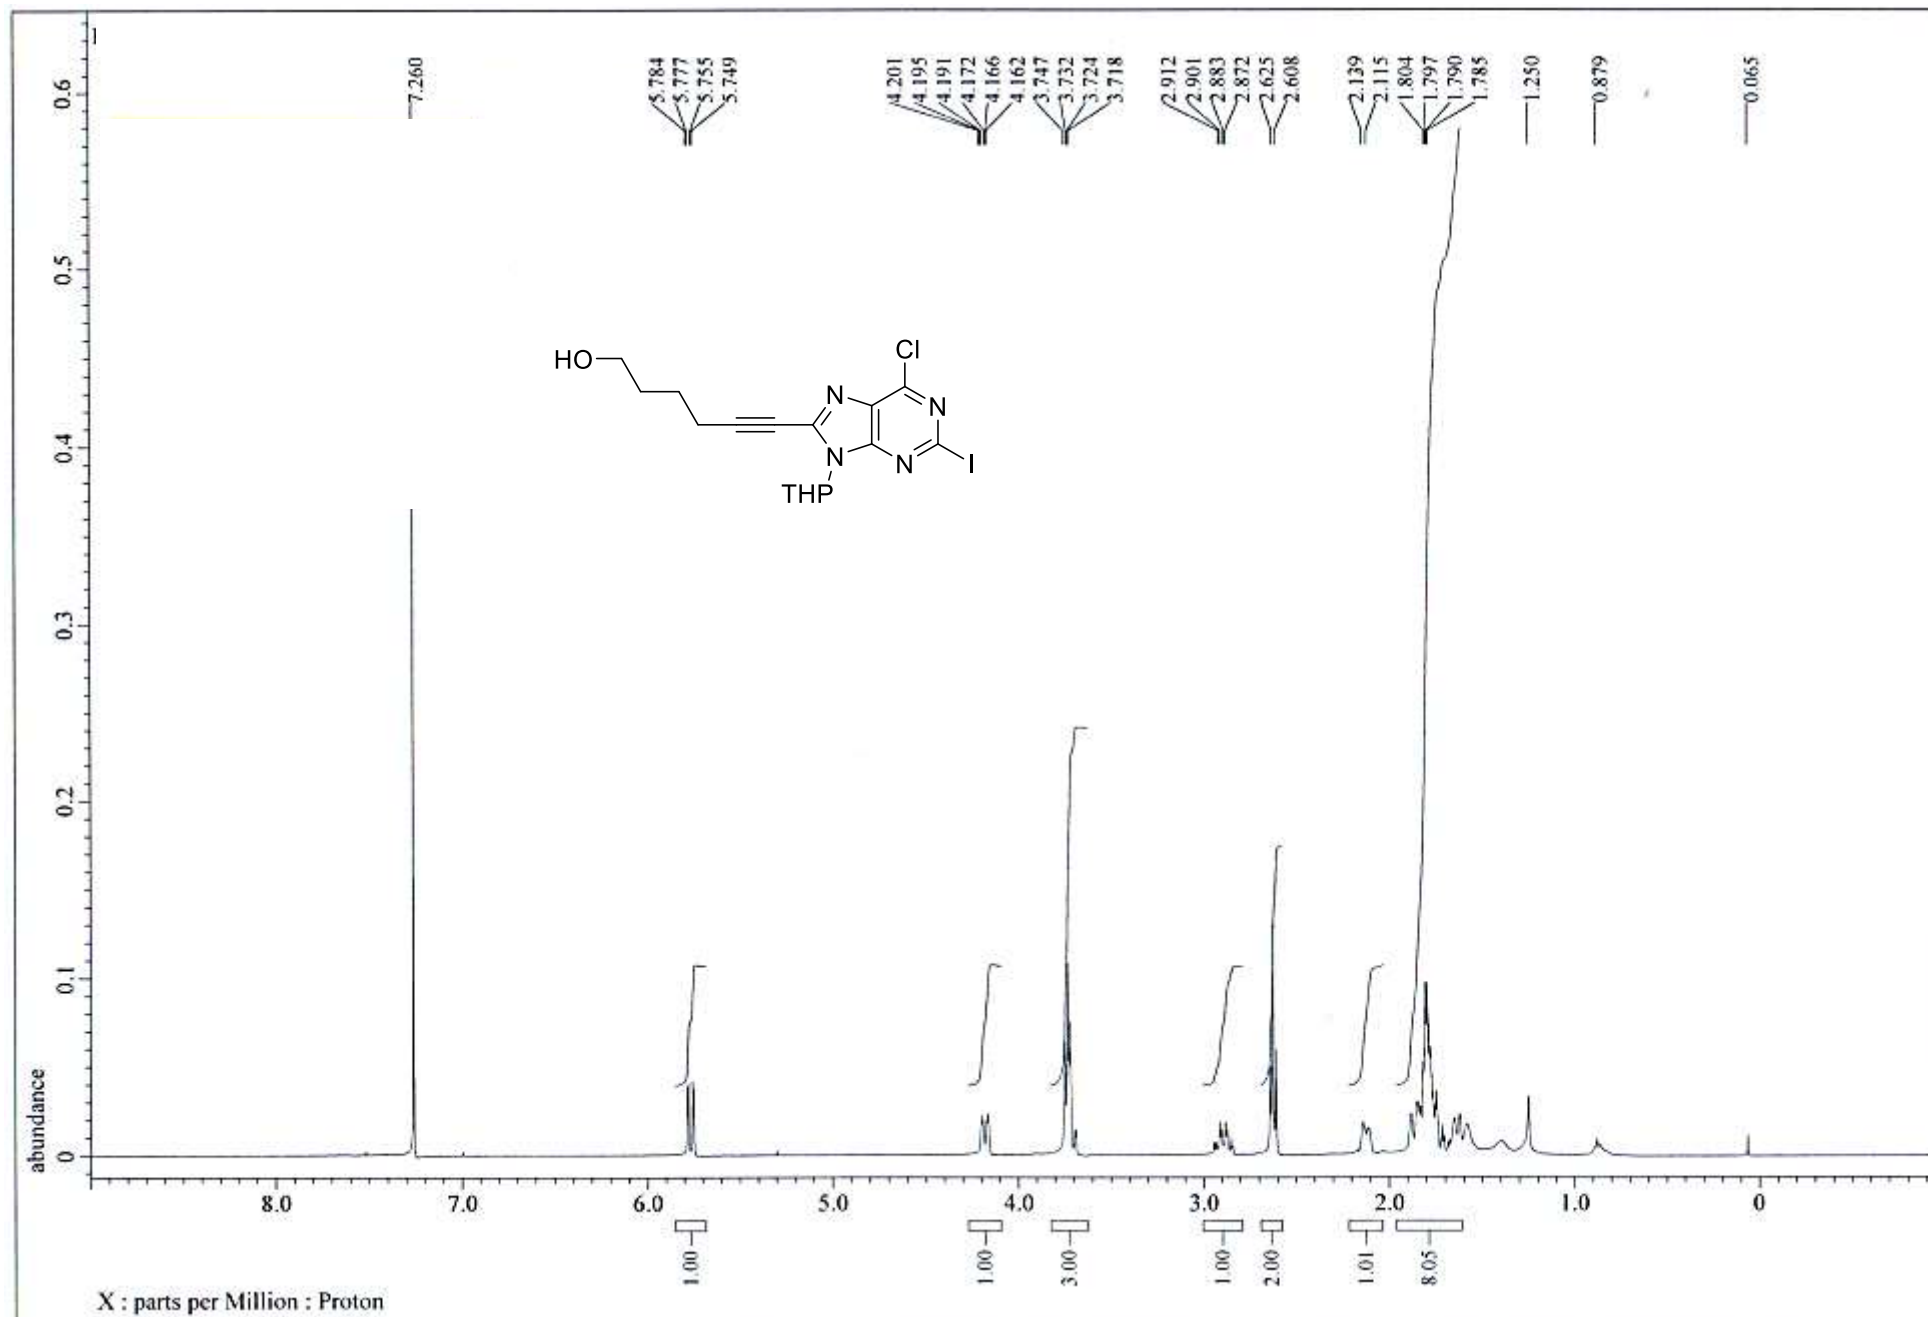

<sup>13</sup>C NMR (100 MHz, CDCl<sub>3</sub>) of **7a**

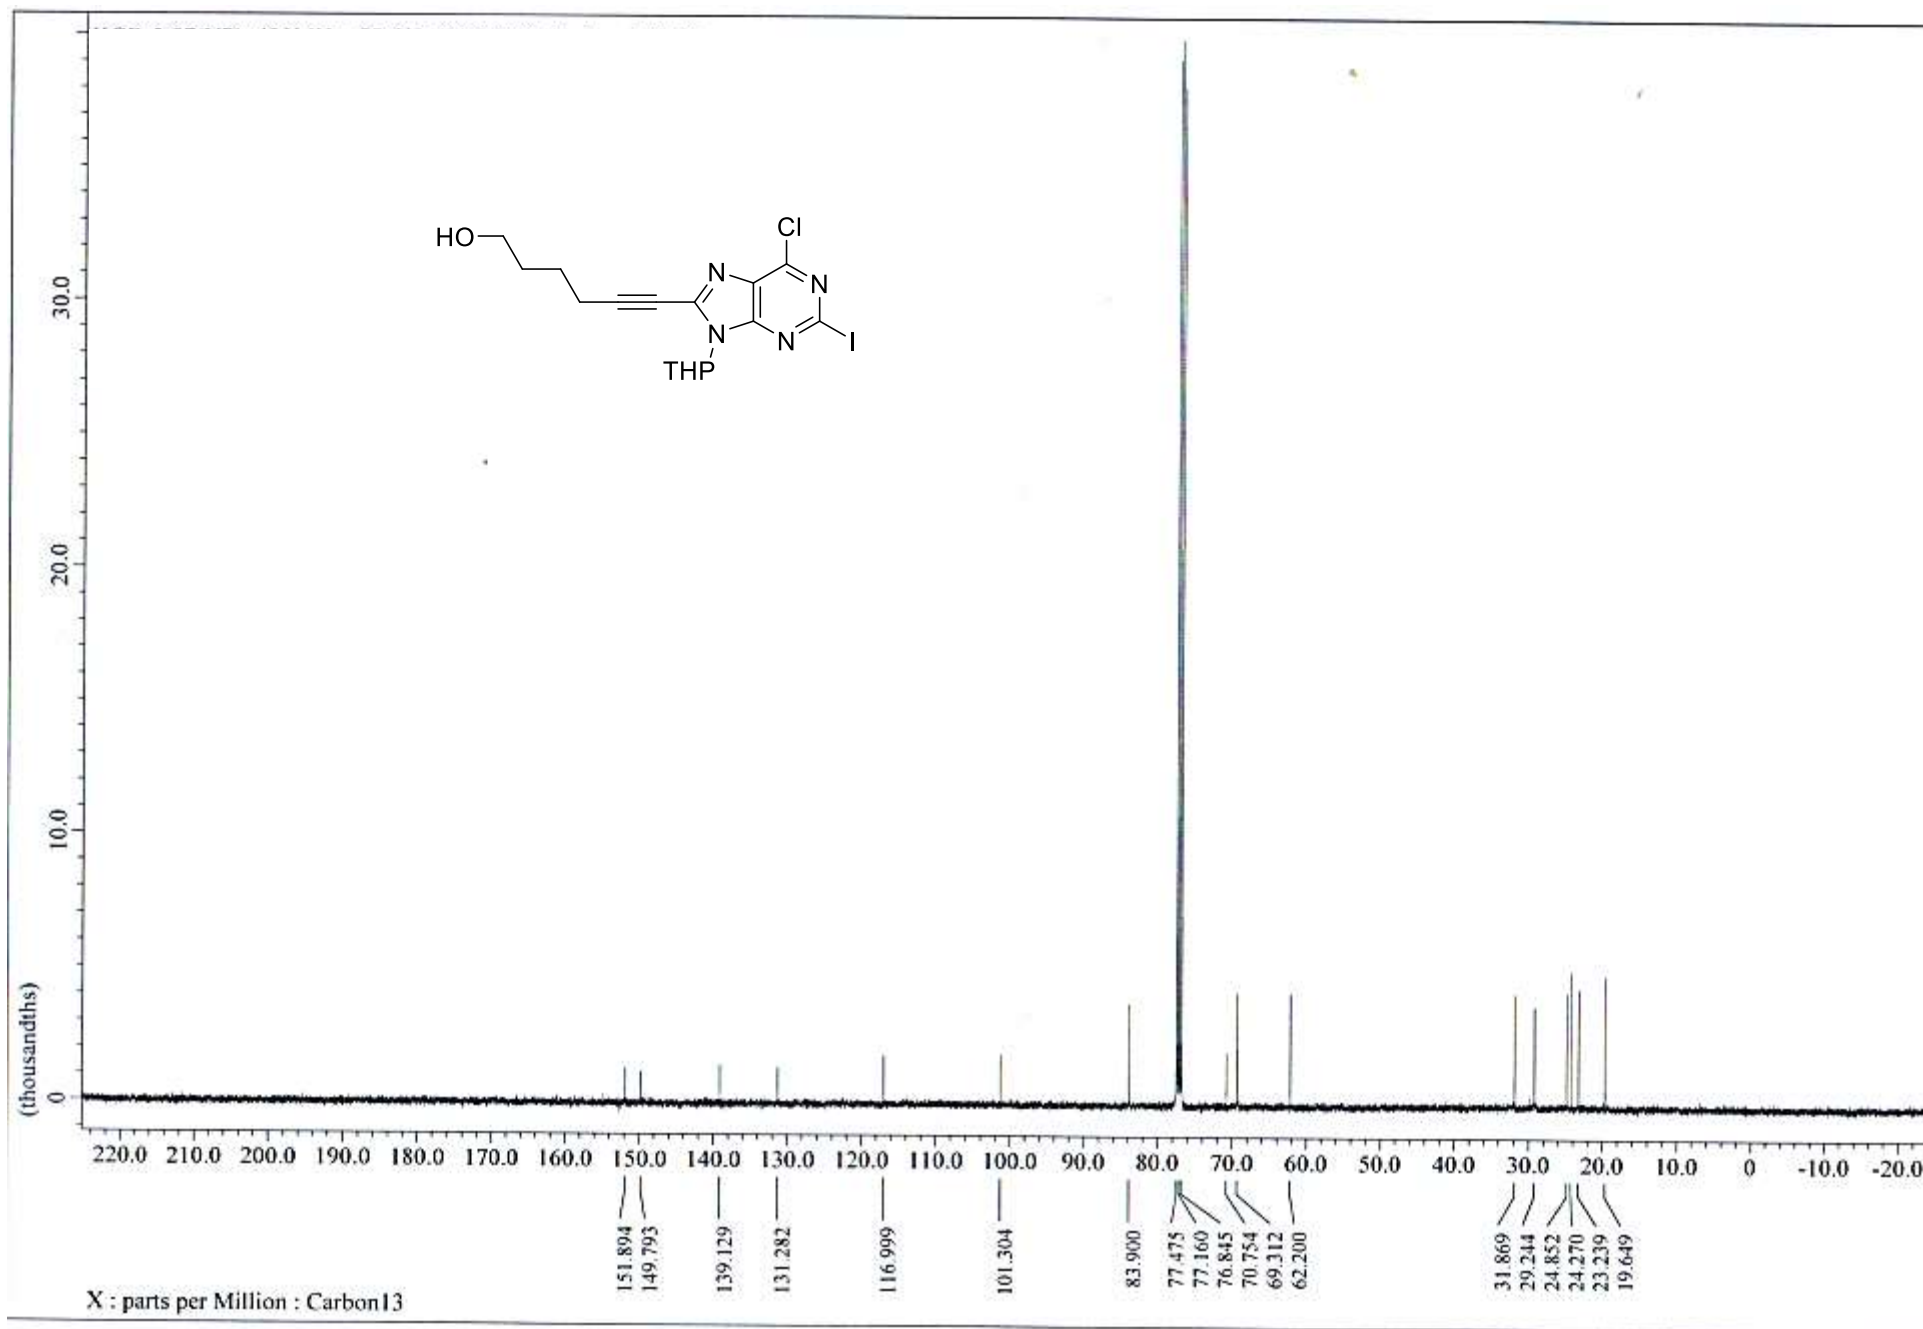

$^1\text{H}$  NMR (400 MHz,  $\text{CDCl}_3$ ) of **8a**

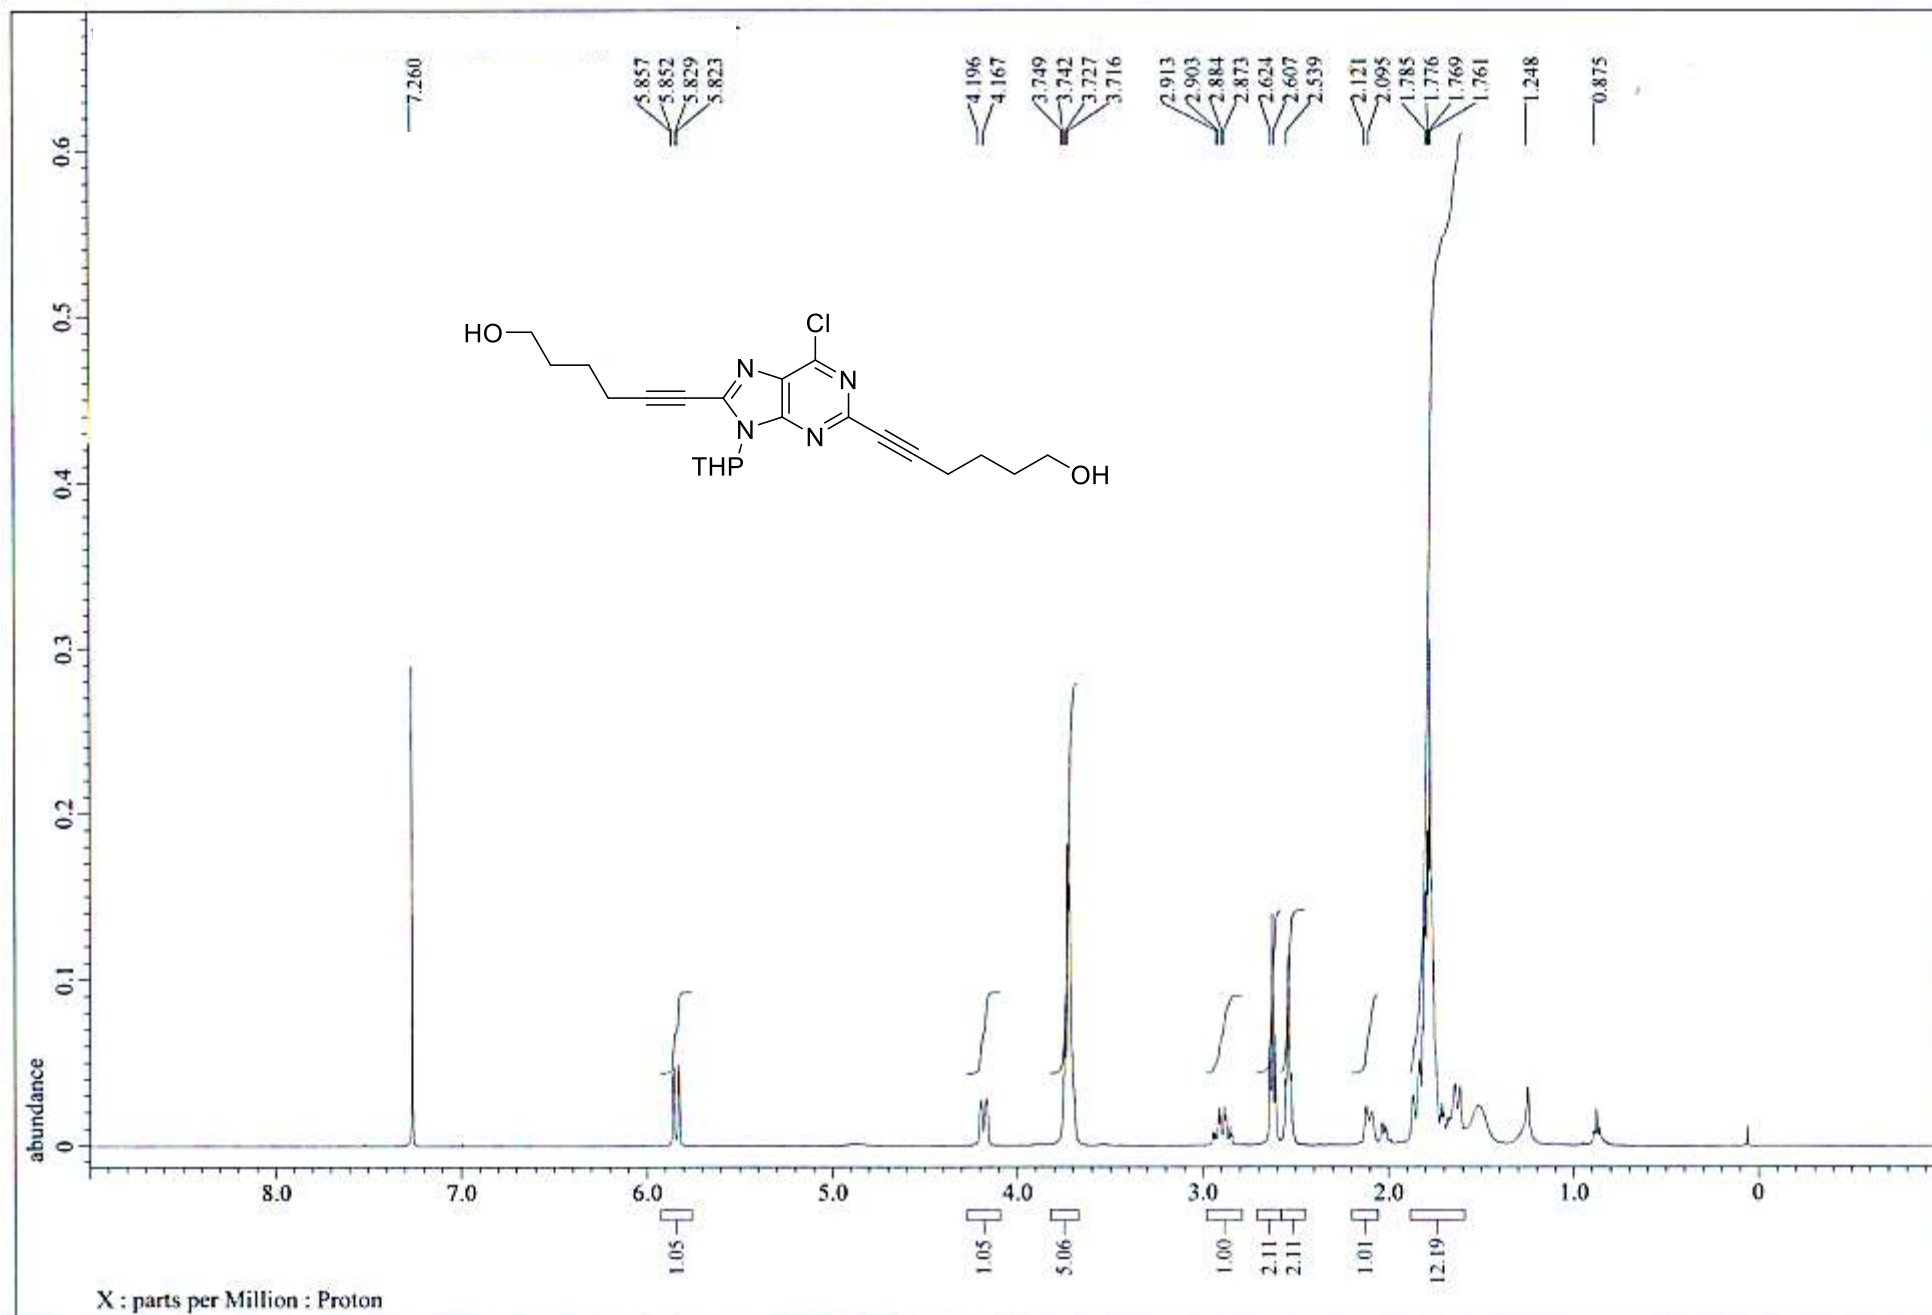

<sup>13</sup>C NMR (100 MHz, CDCl<sub>3</sub>) of **8a**

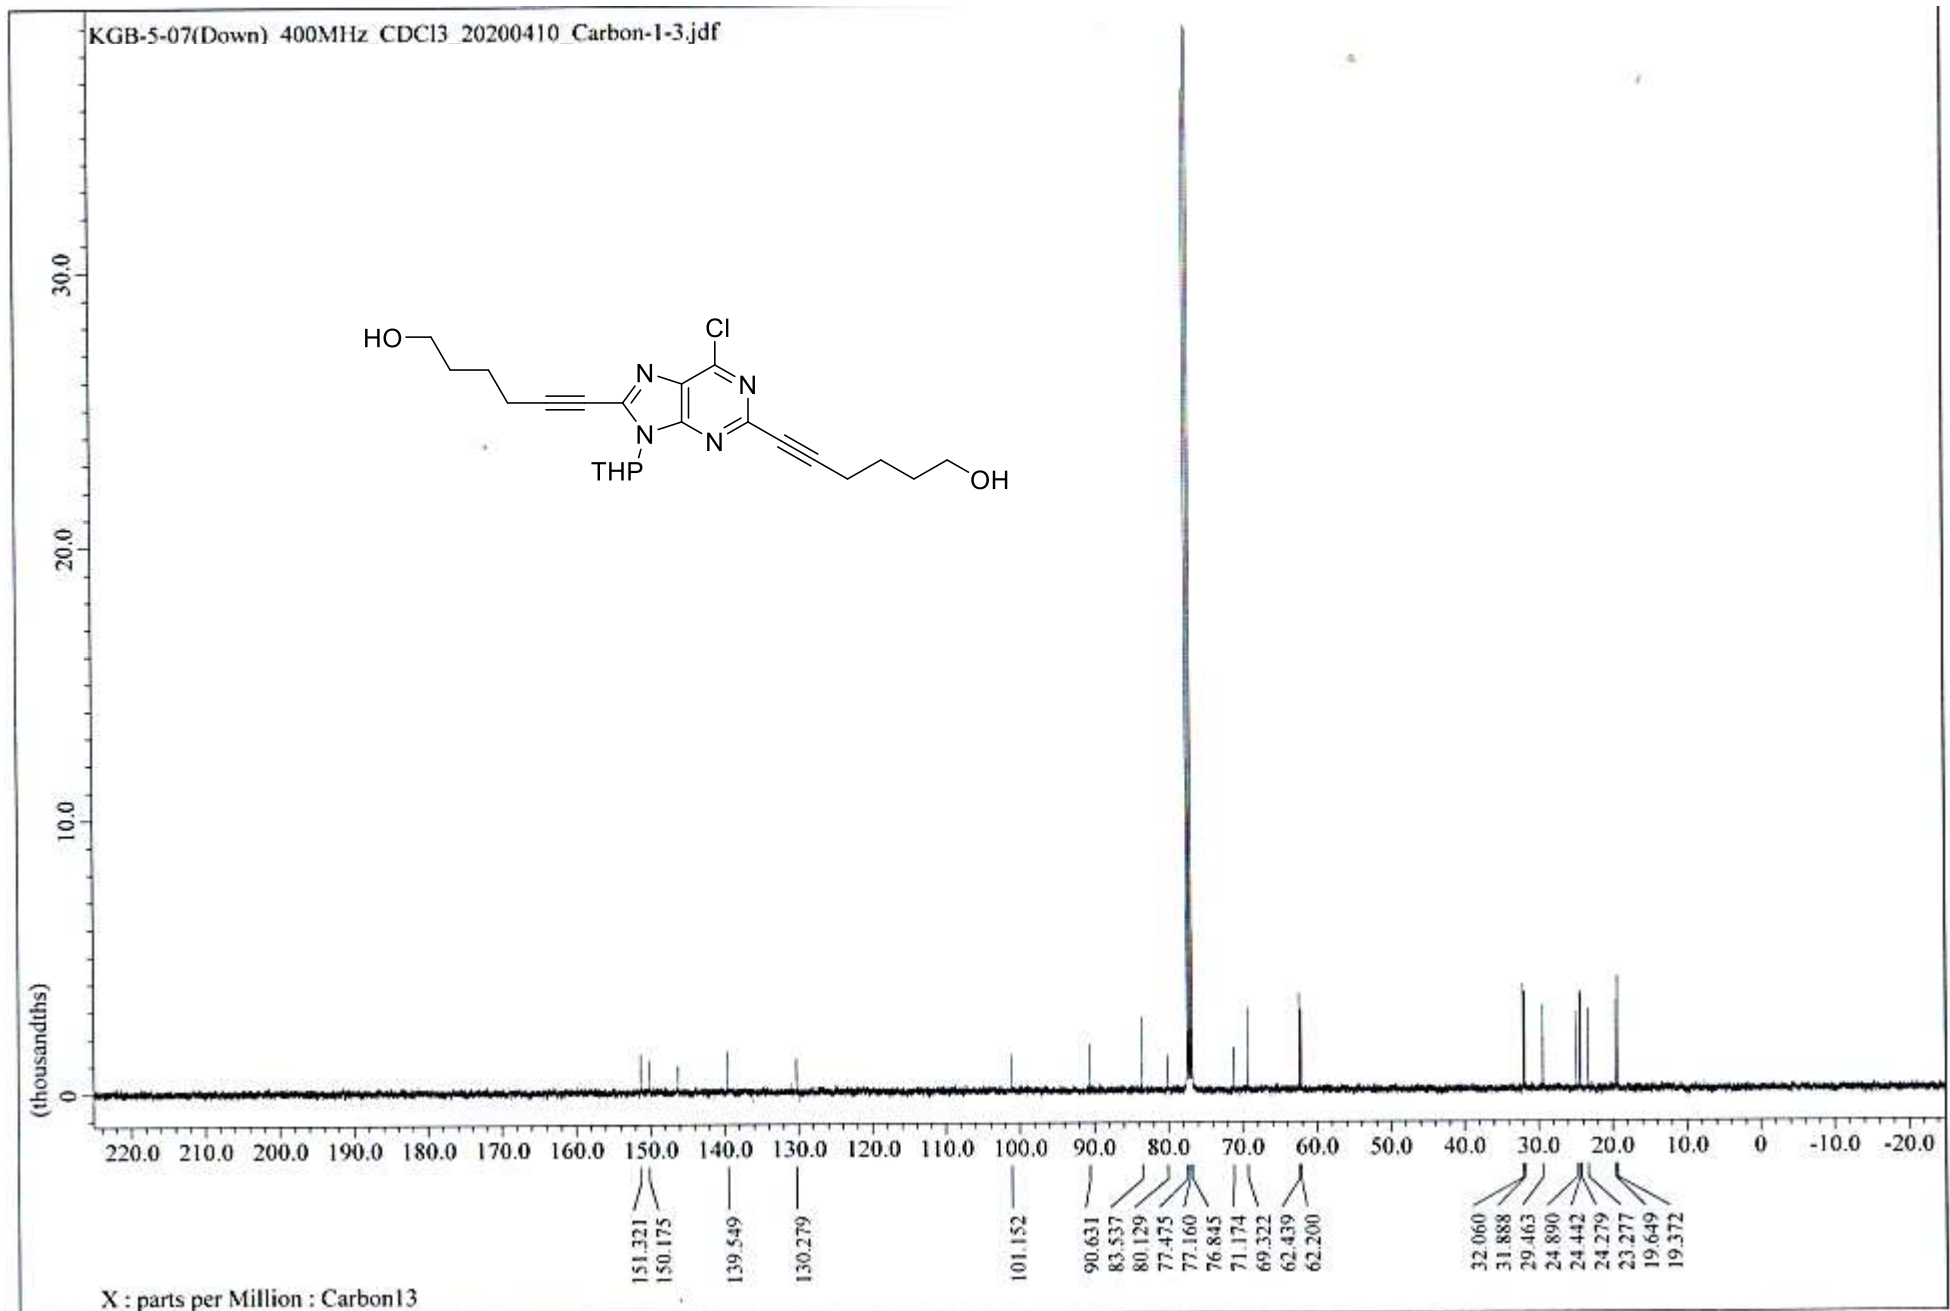

<sup>1</sup>H NMR (400 MHz, CDCl<sub>3</sub>) of **6b**

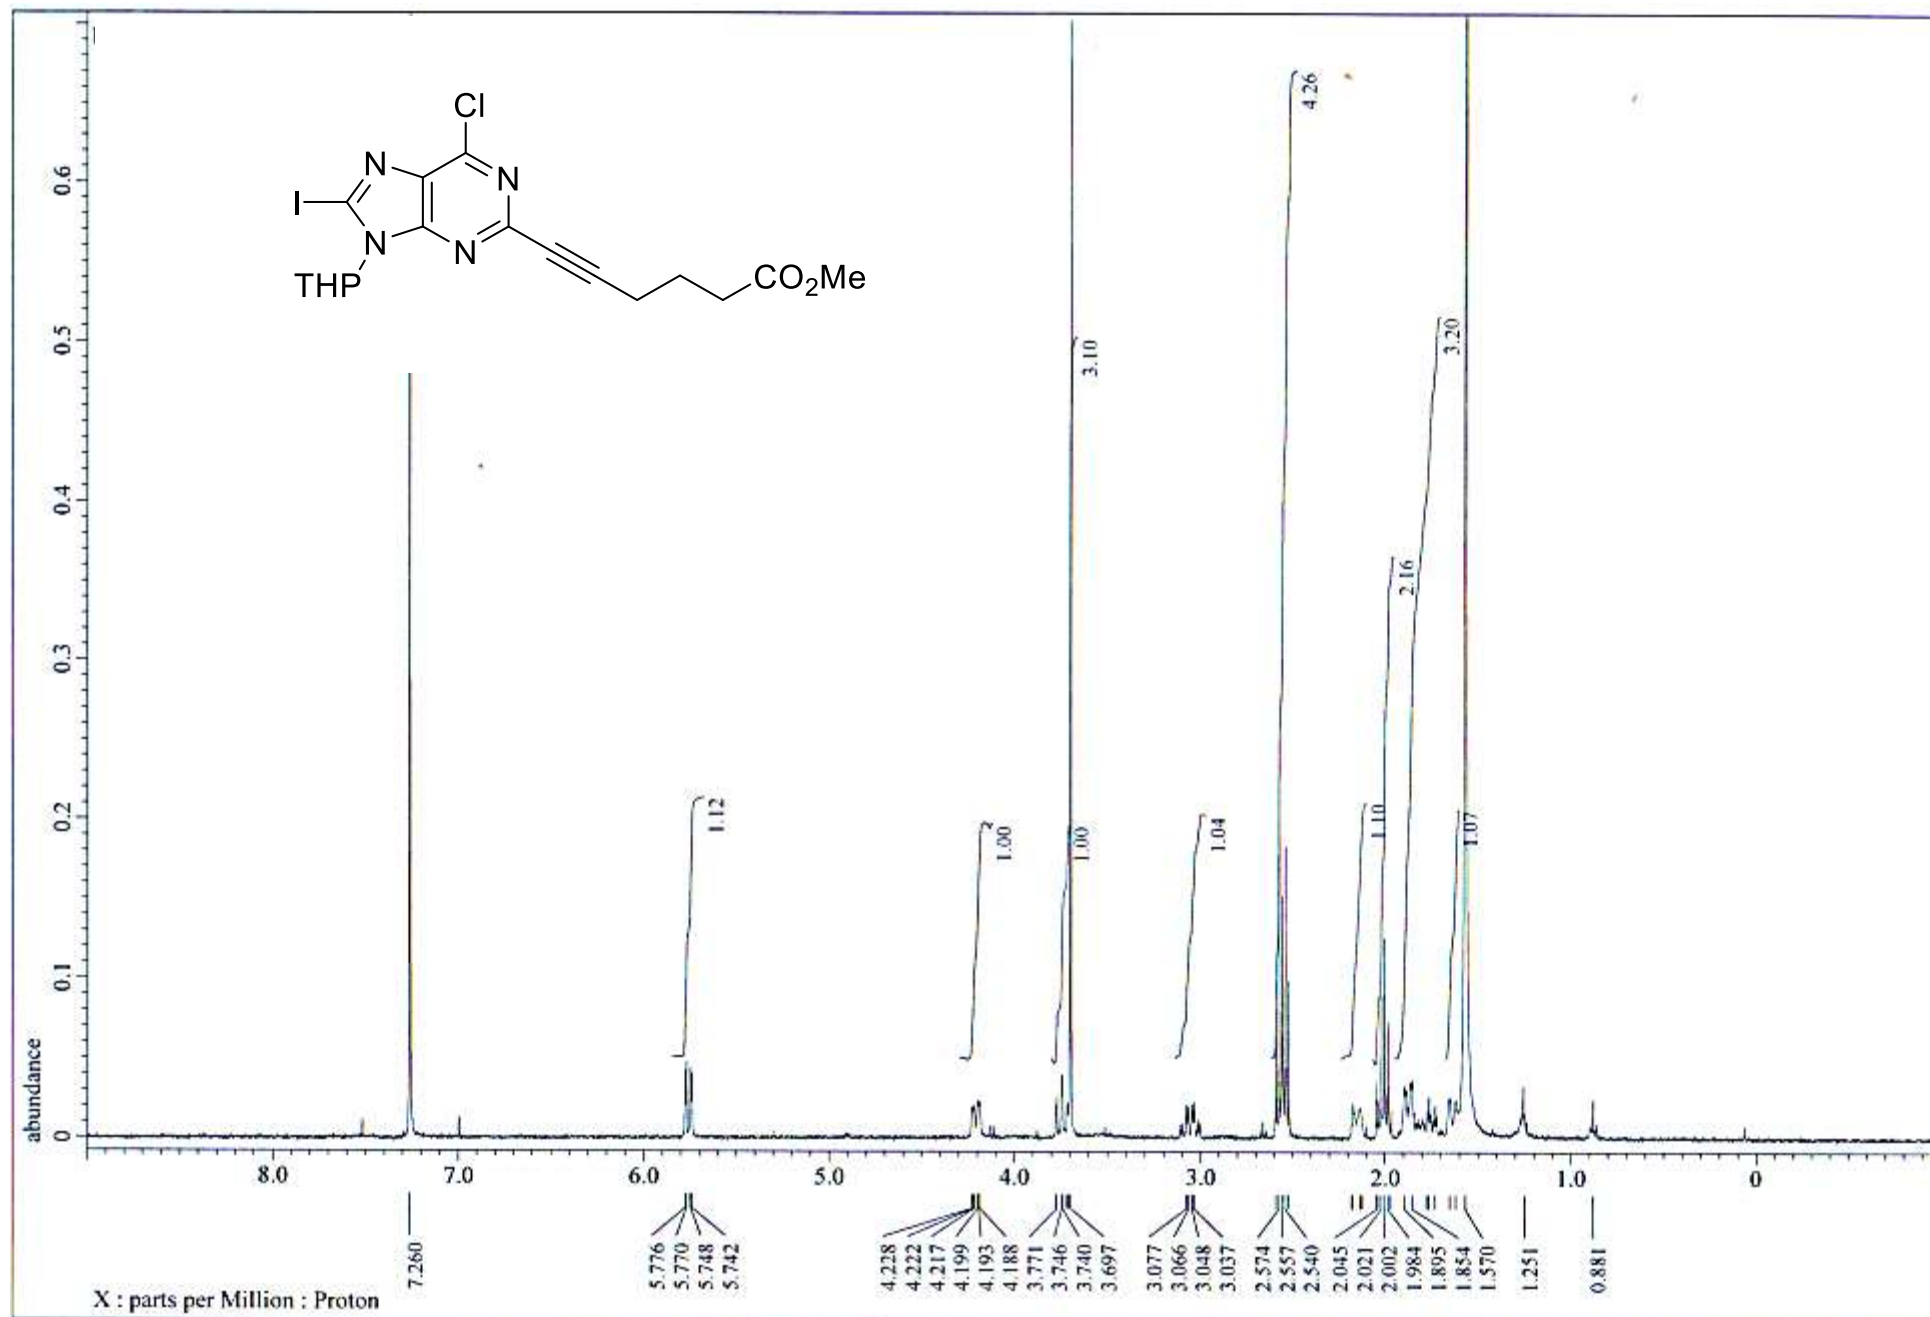

$^{13}\text{C}$  NMR (100 MHz,  $\text{CDCl}_3$ ) of **6b**

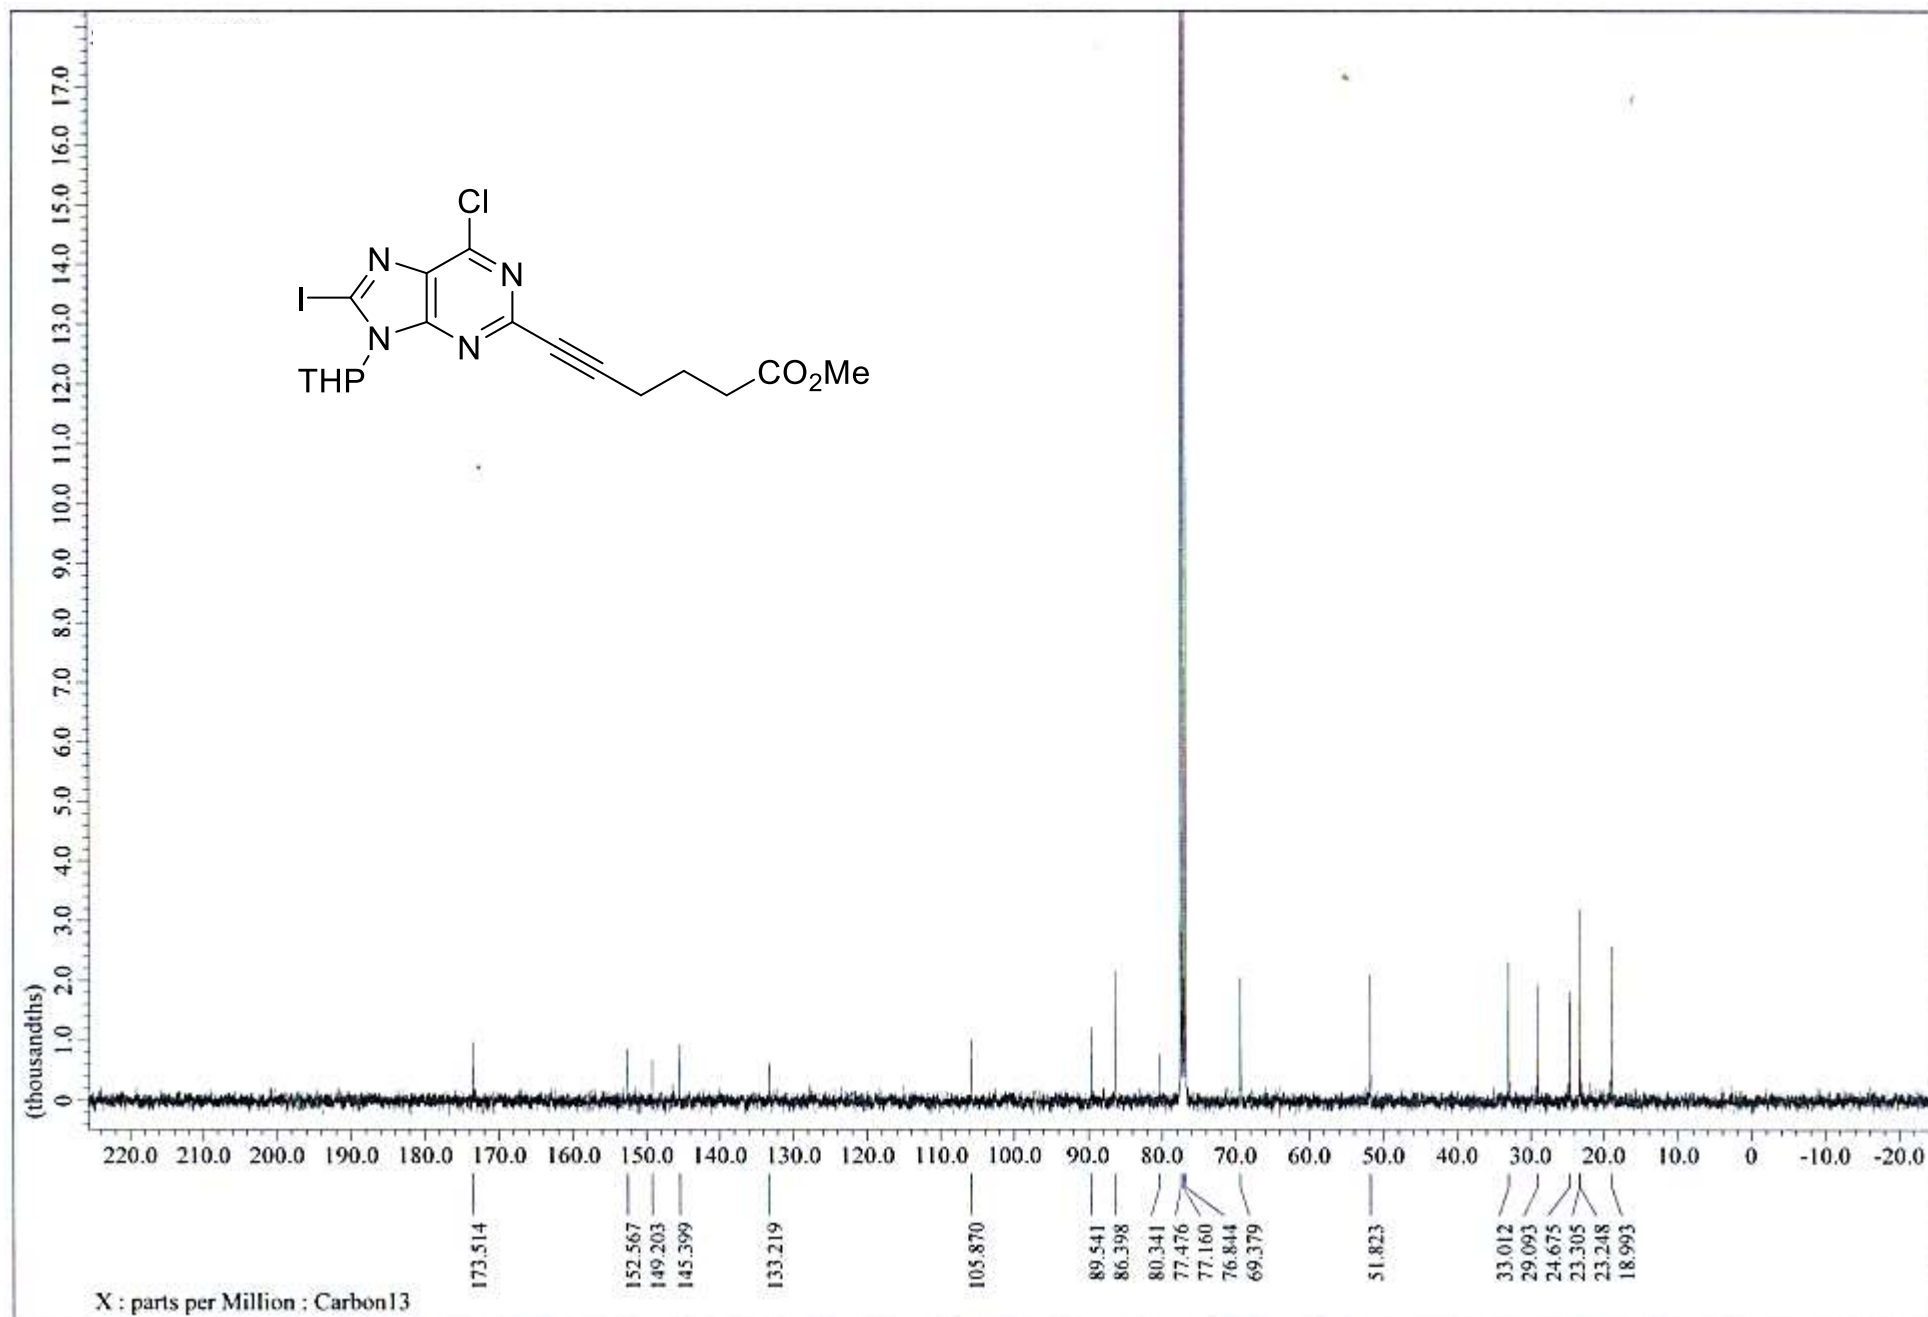



<sup>1</sup>H NMR (400 MHz, CDCl<sub>3</sub>) of **7b**

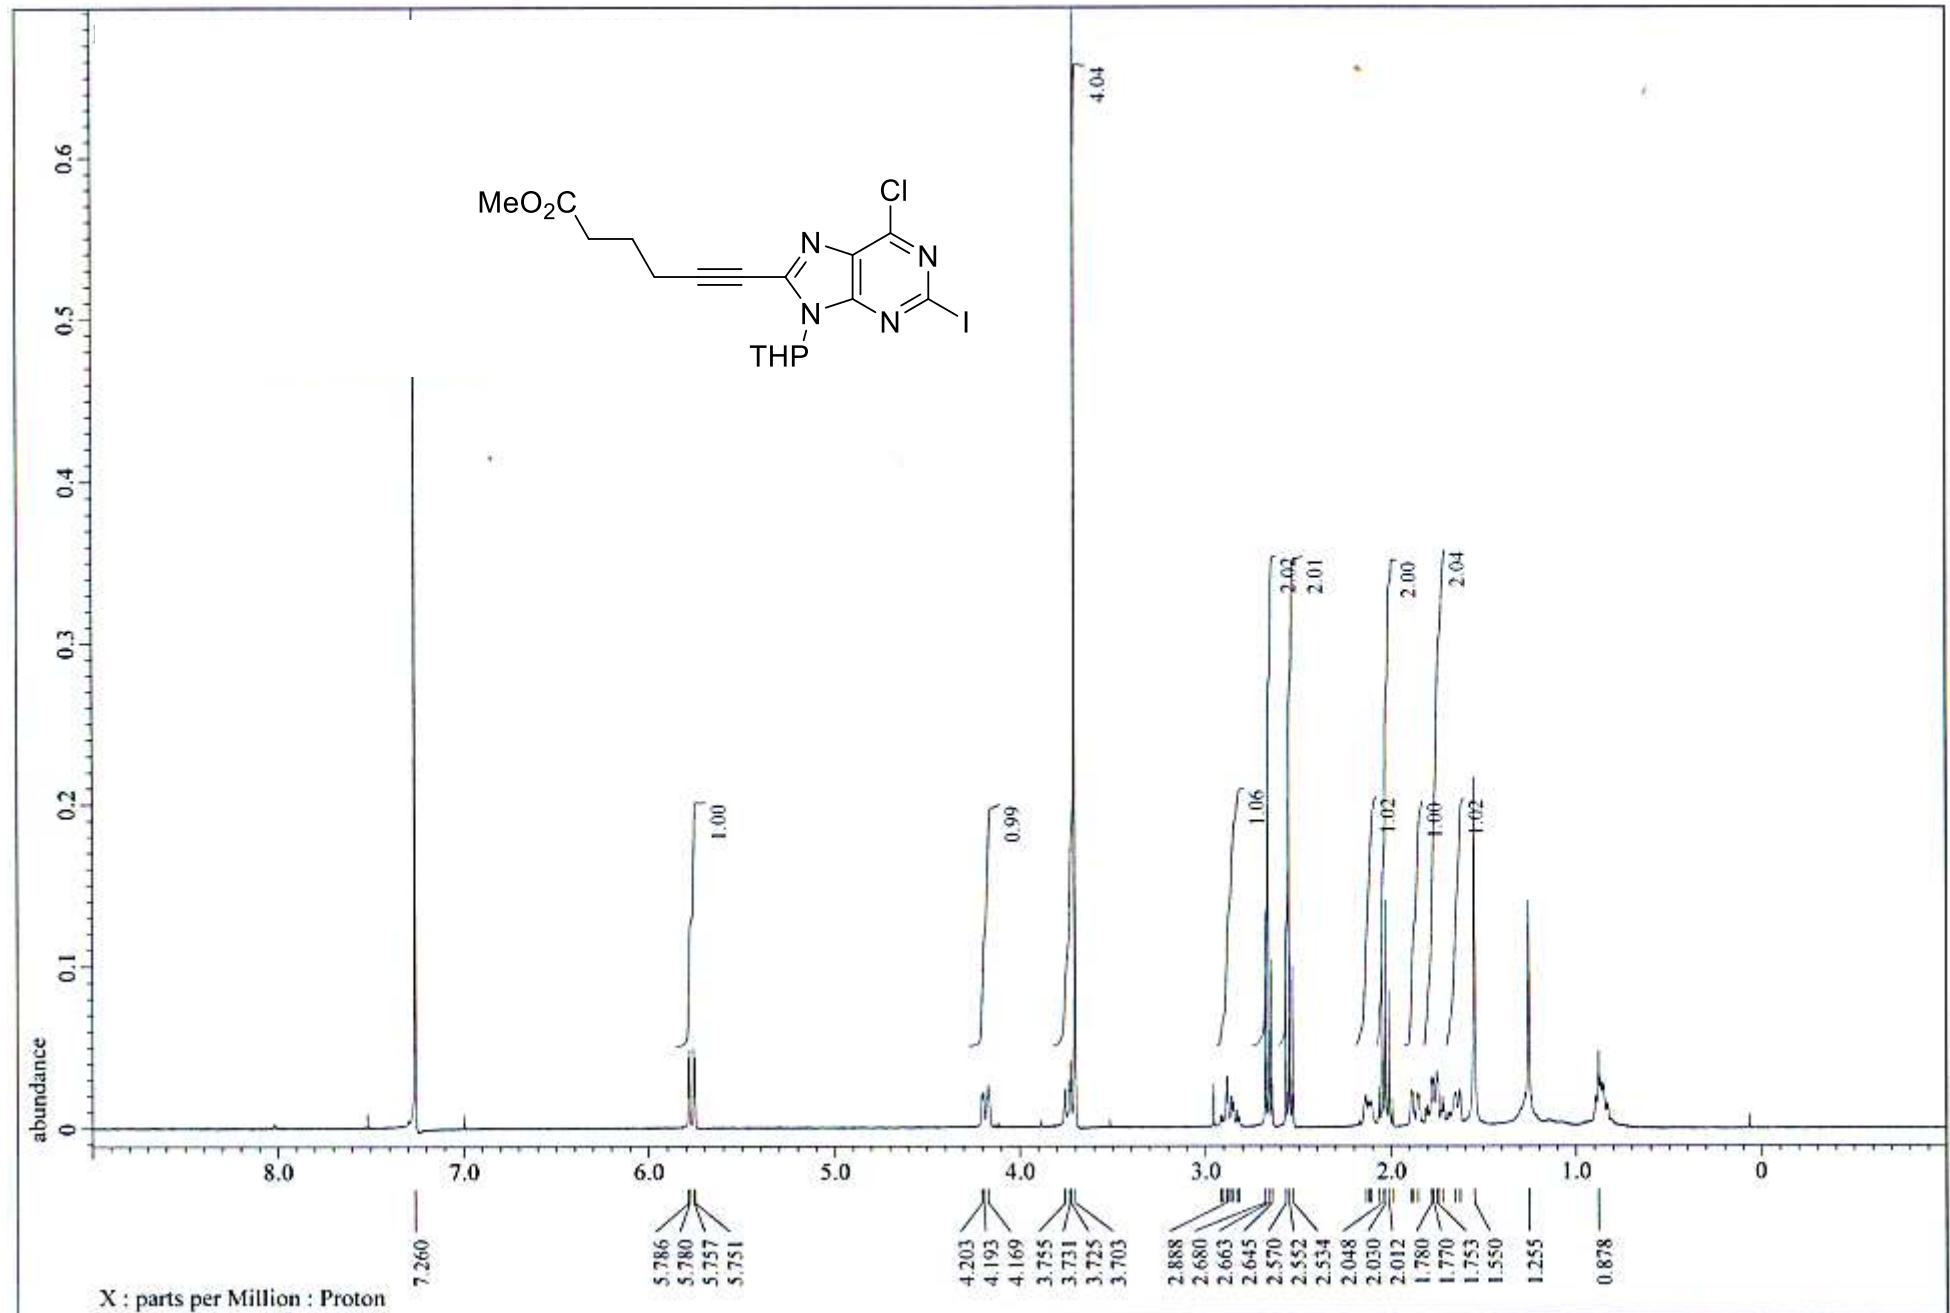

<sup>13</sup>C NMR (100 MHz, CDCl<sub>3</sub>) of **7b**

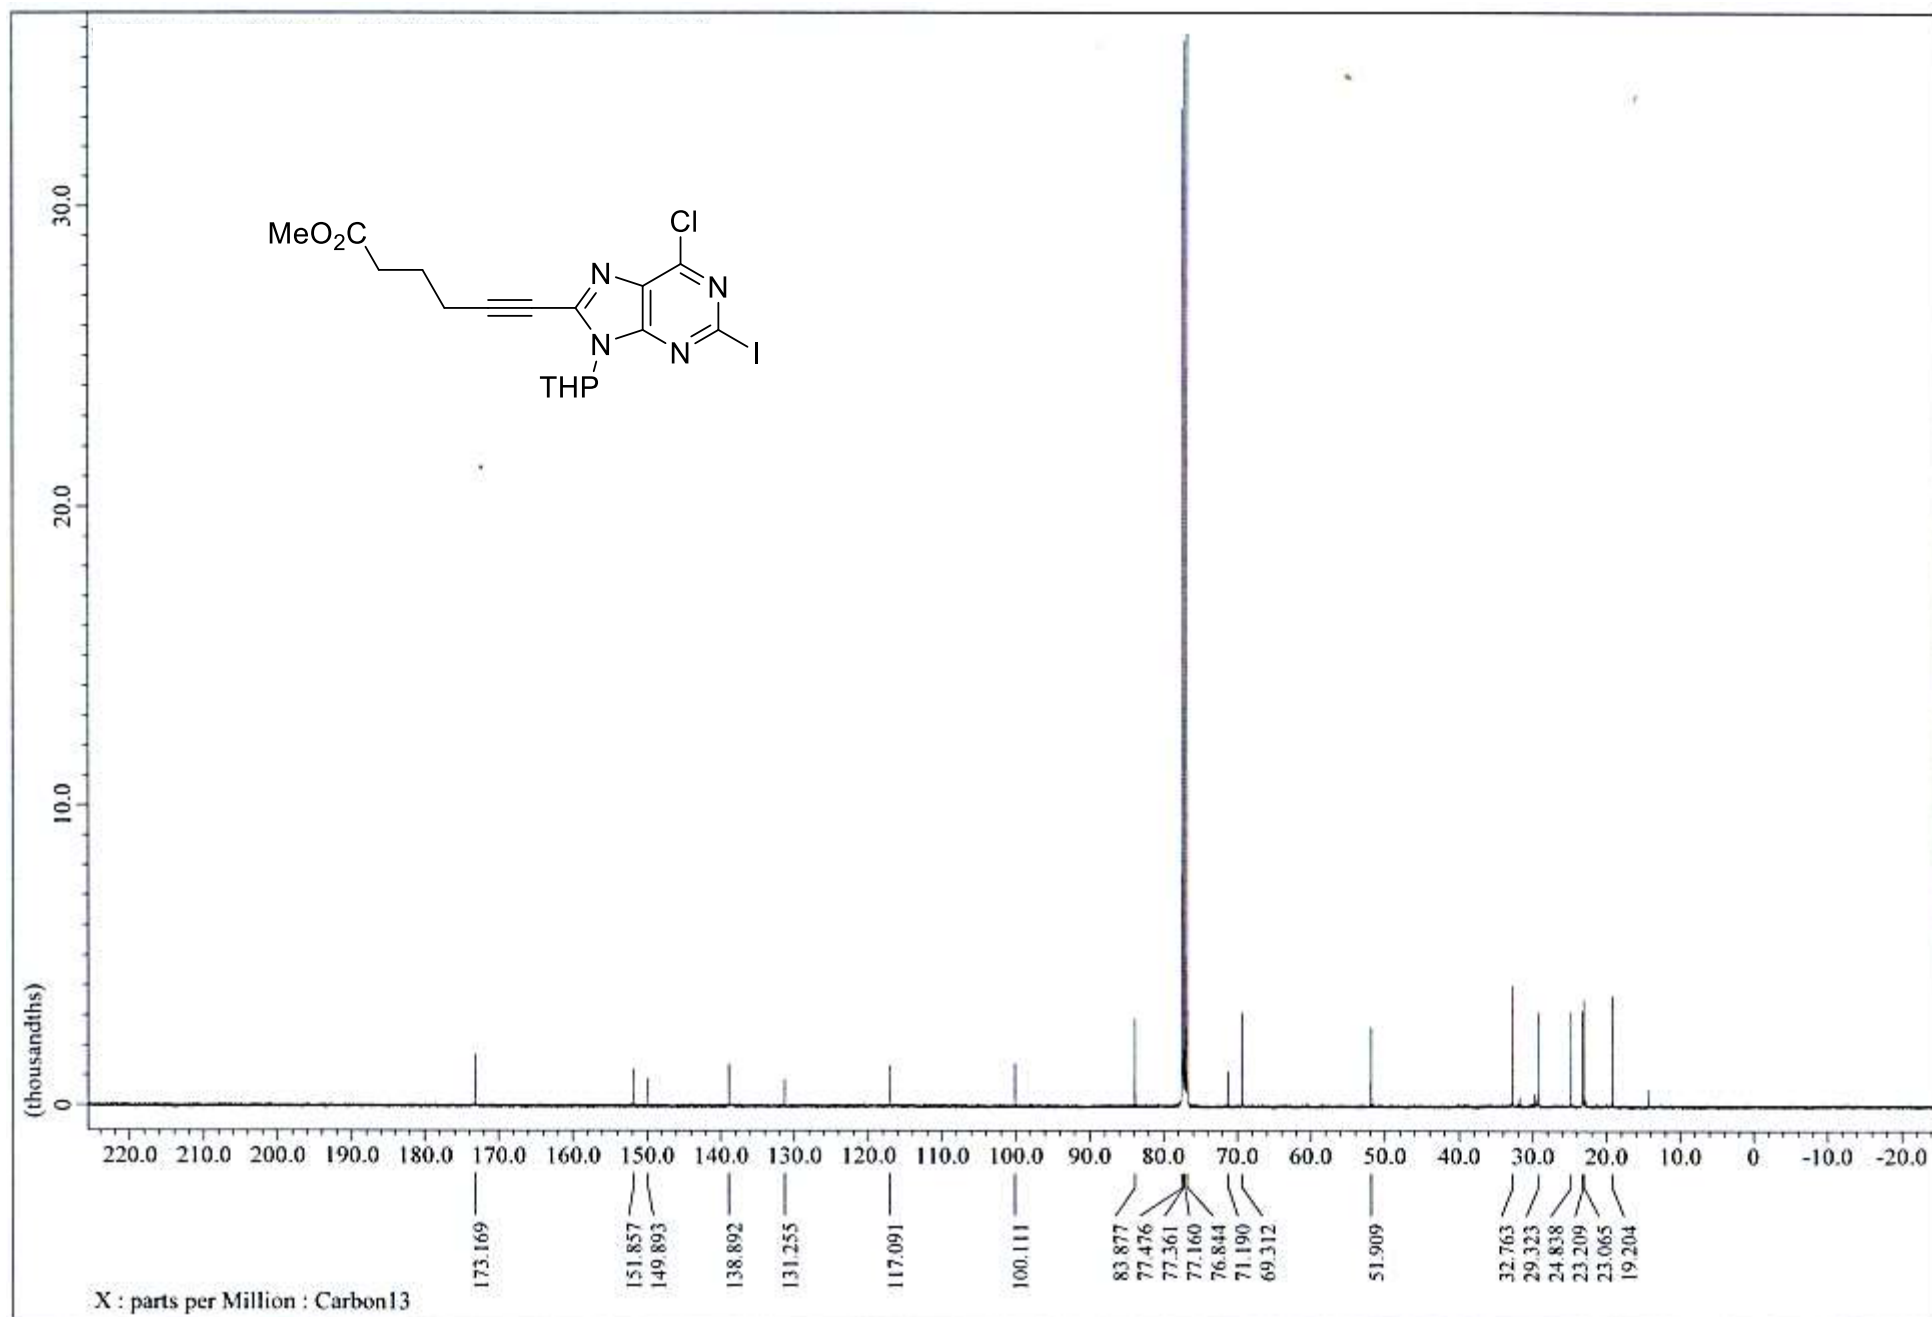

<sup>1</sup>H NMR (400 MHz, CDCl<sub>3</sub>) of **8b**

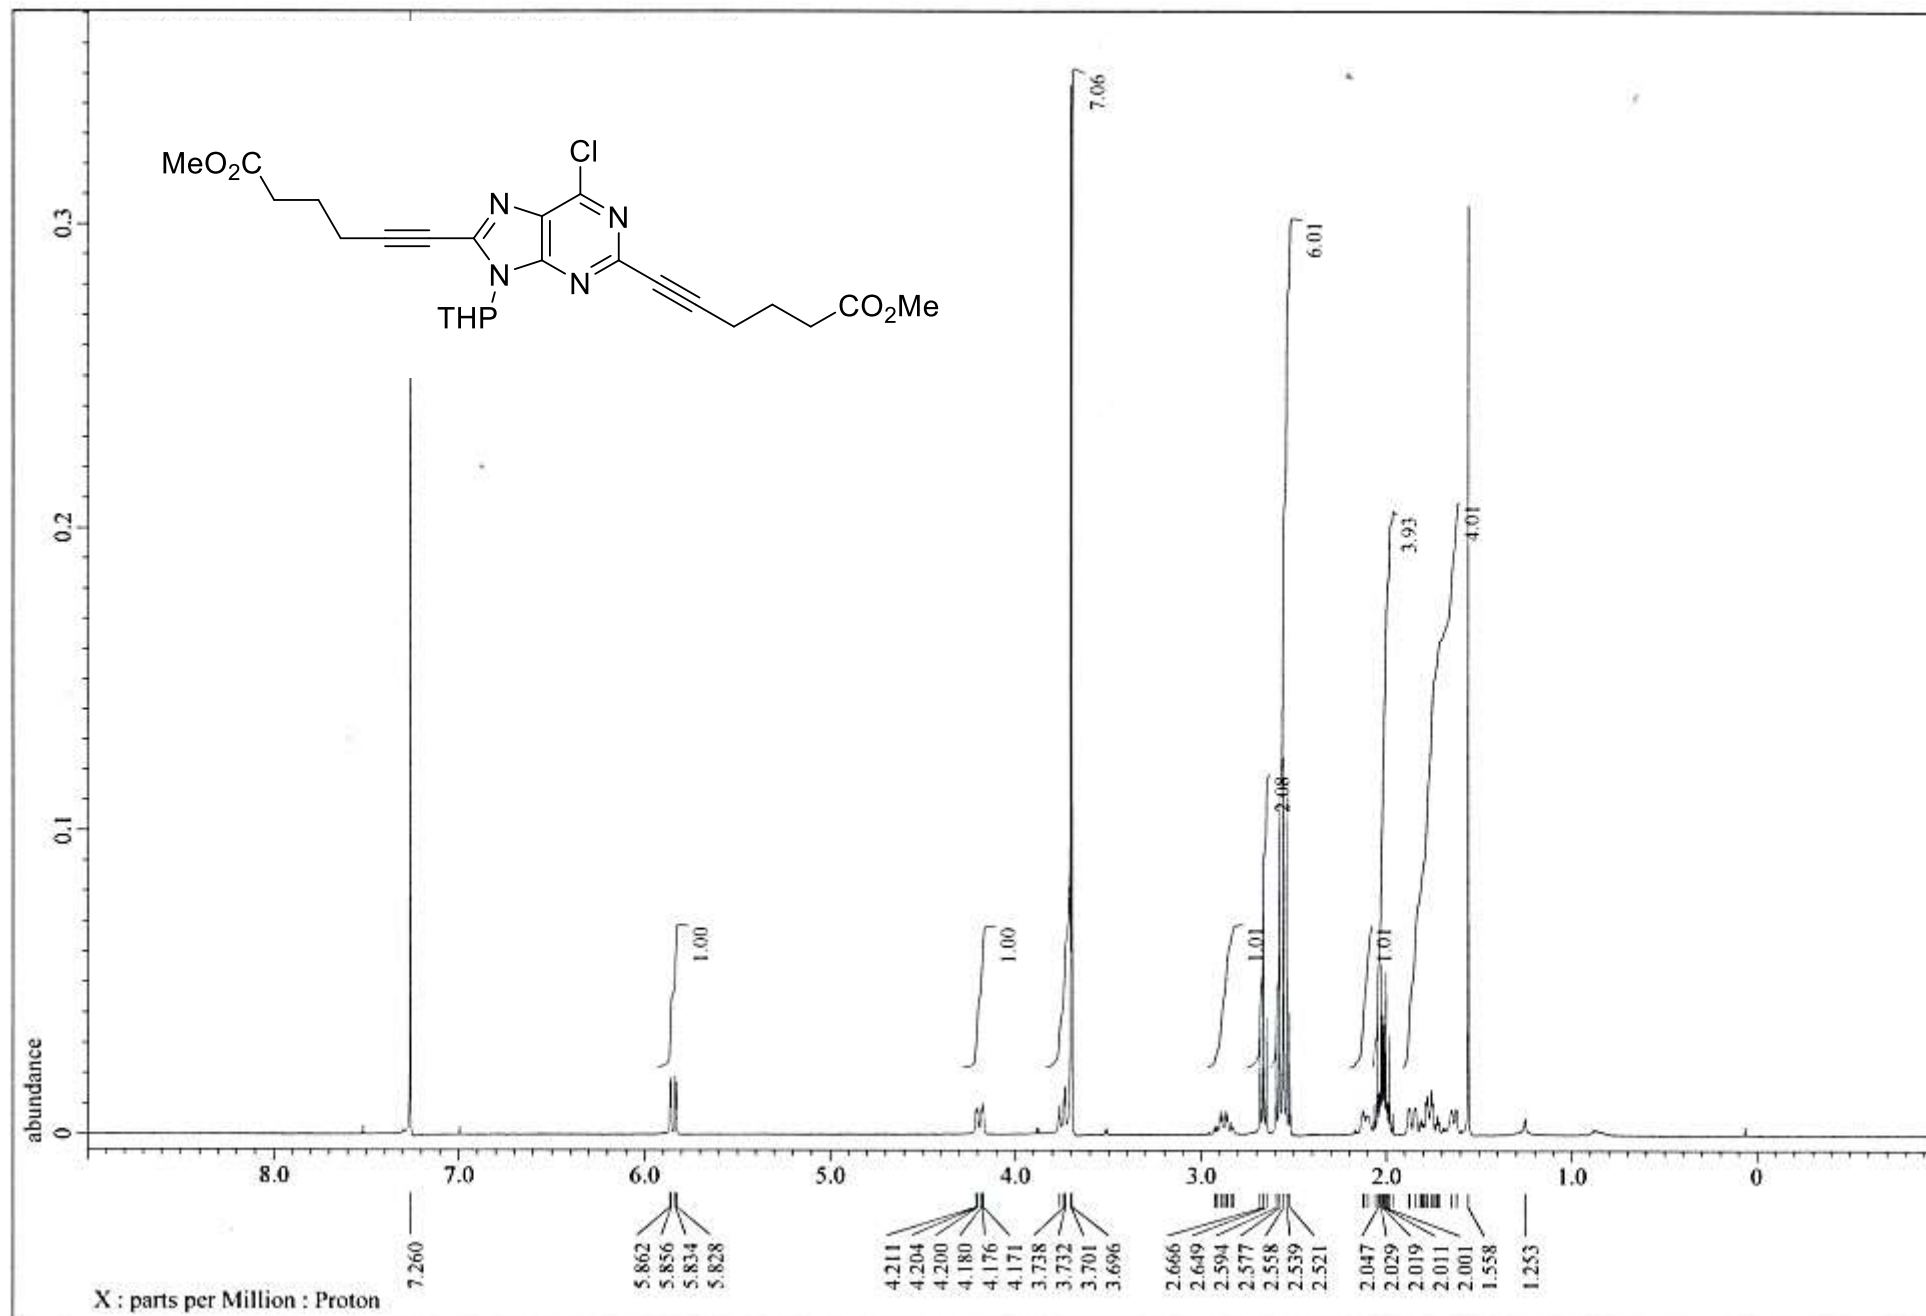

<sup>13</sup>C NMR (100 MHz, CDCl<sub>3</sub>) of **8b**

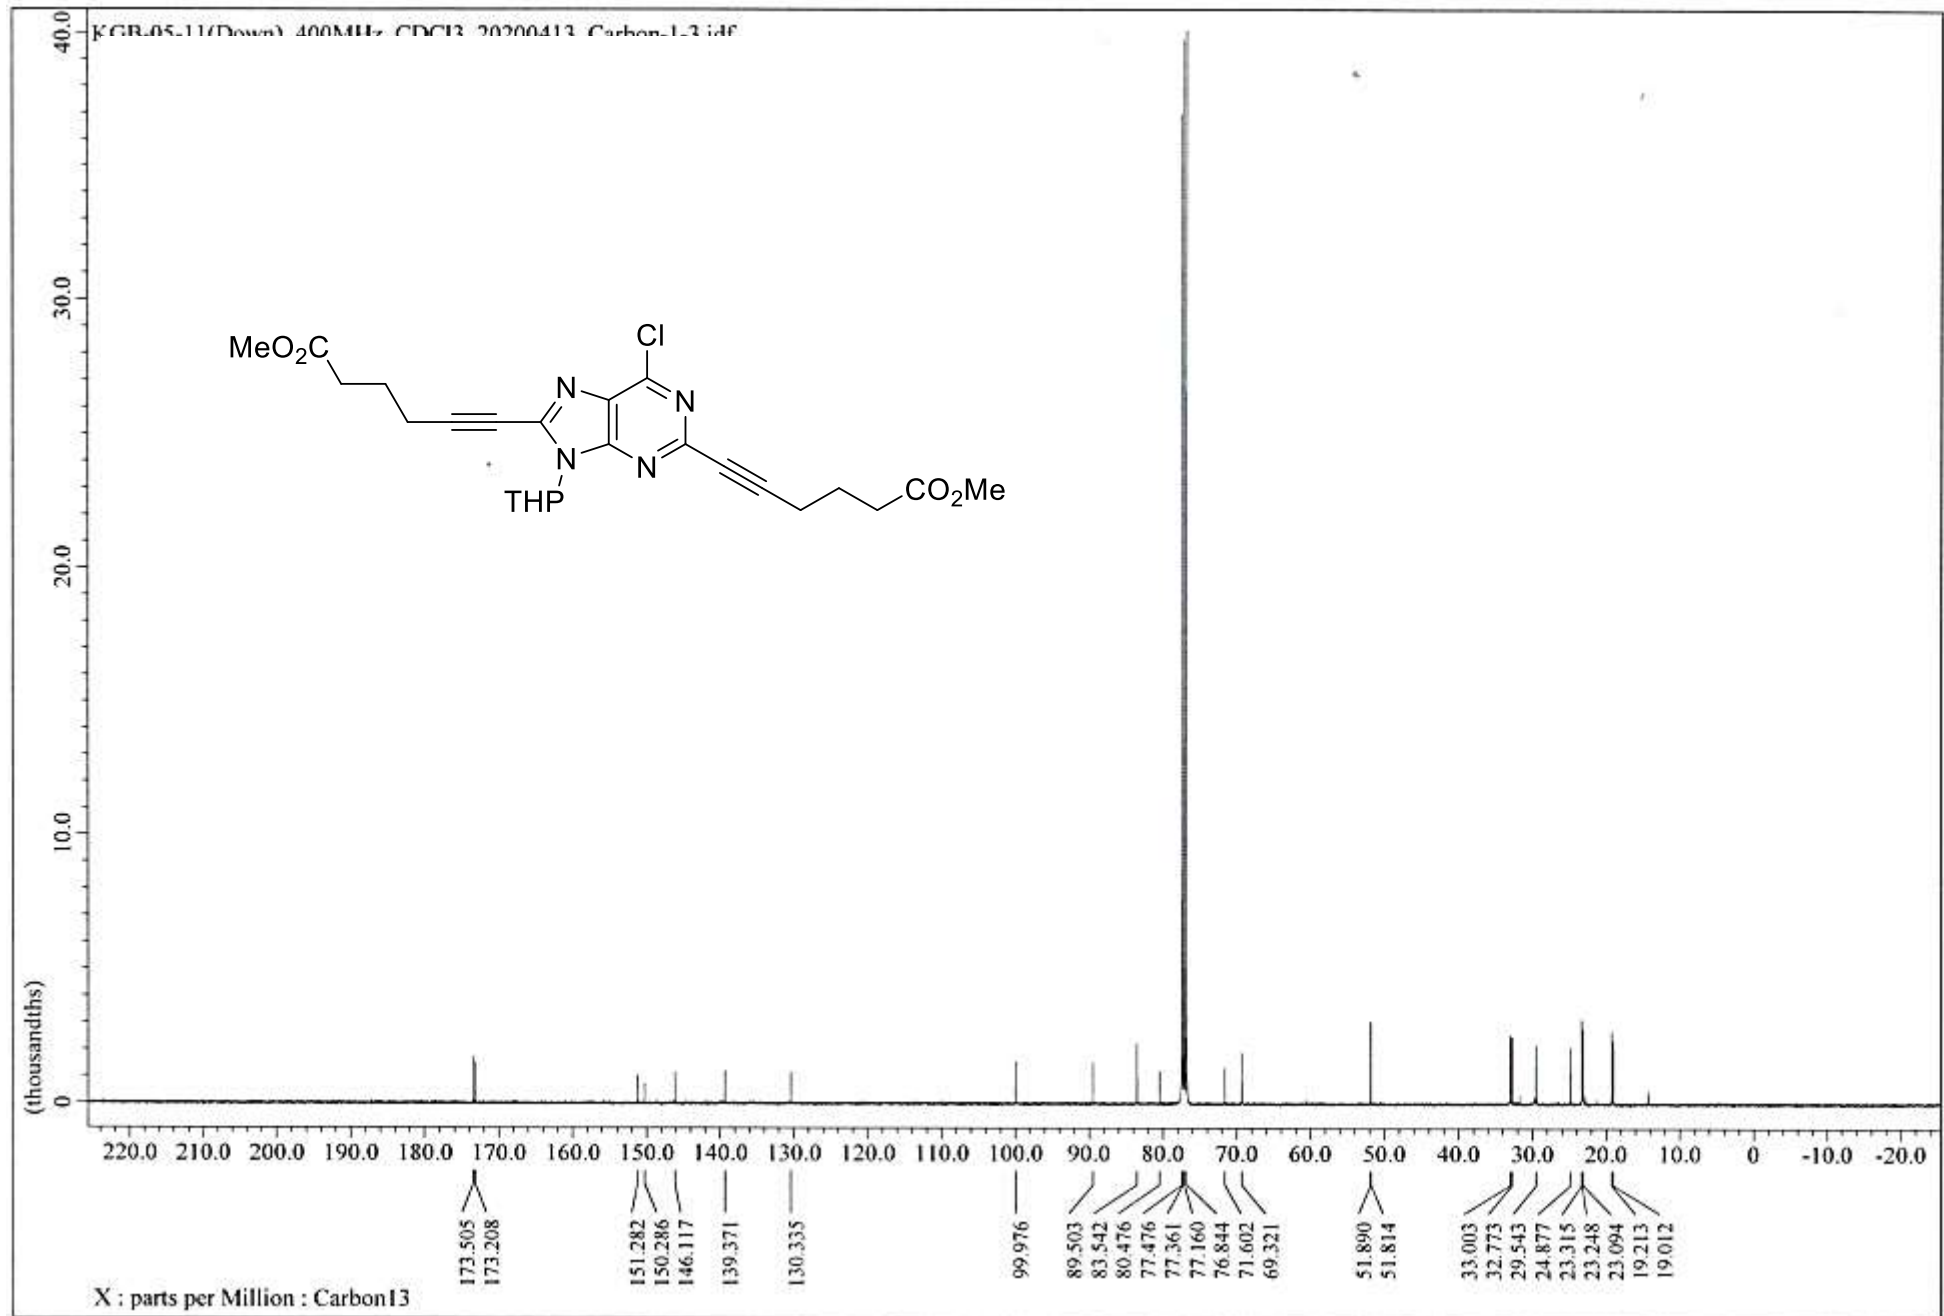

$^1\text{H}$  NMR (400 MHz,  $\text{CDCl}_3$ ) of **7c**

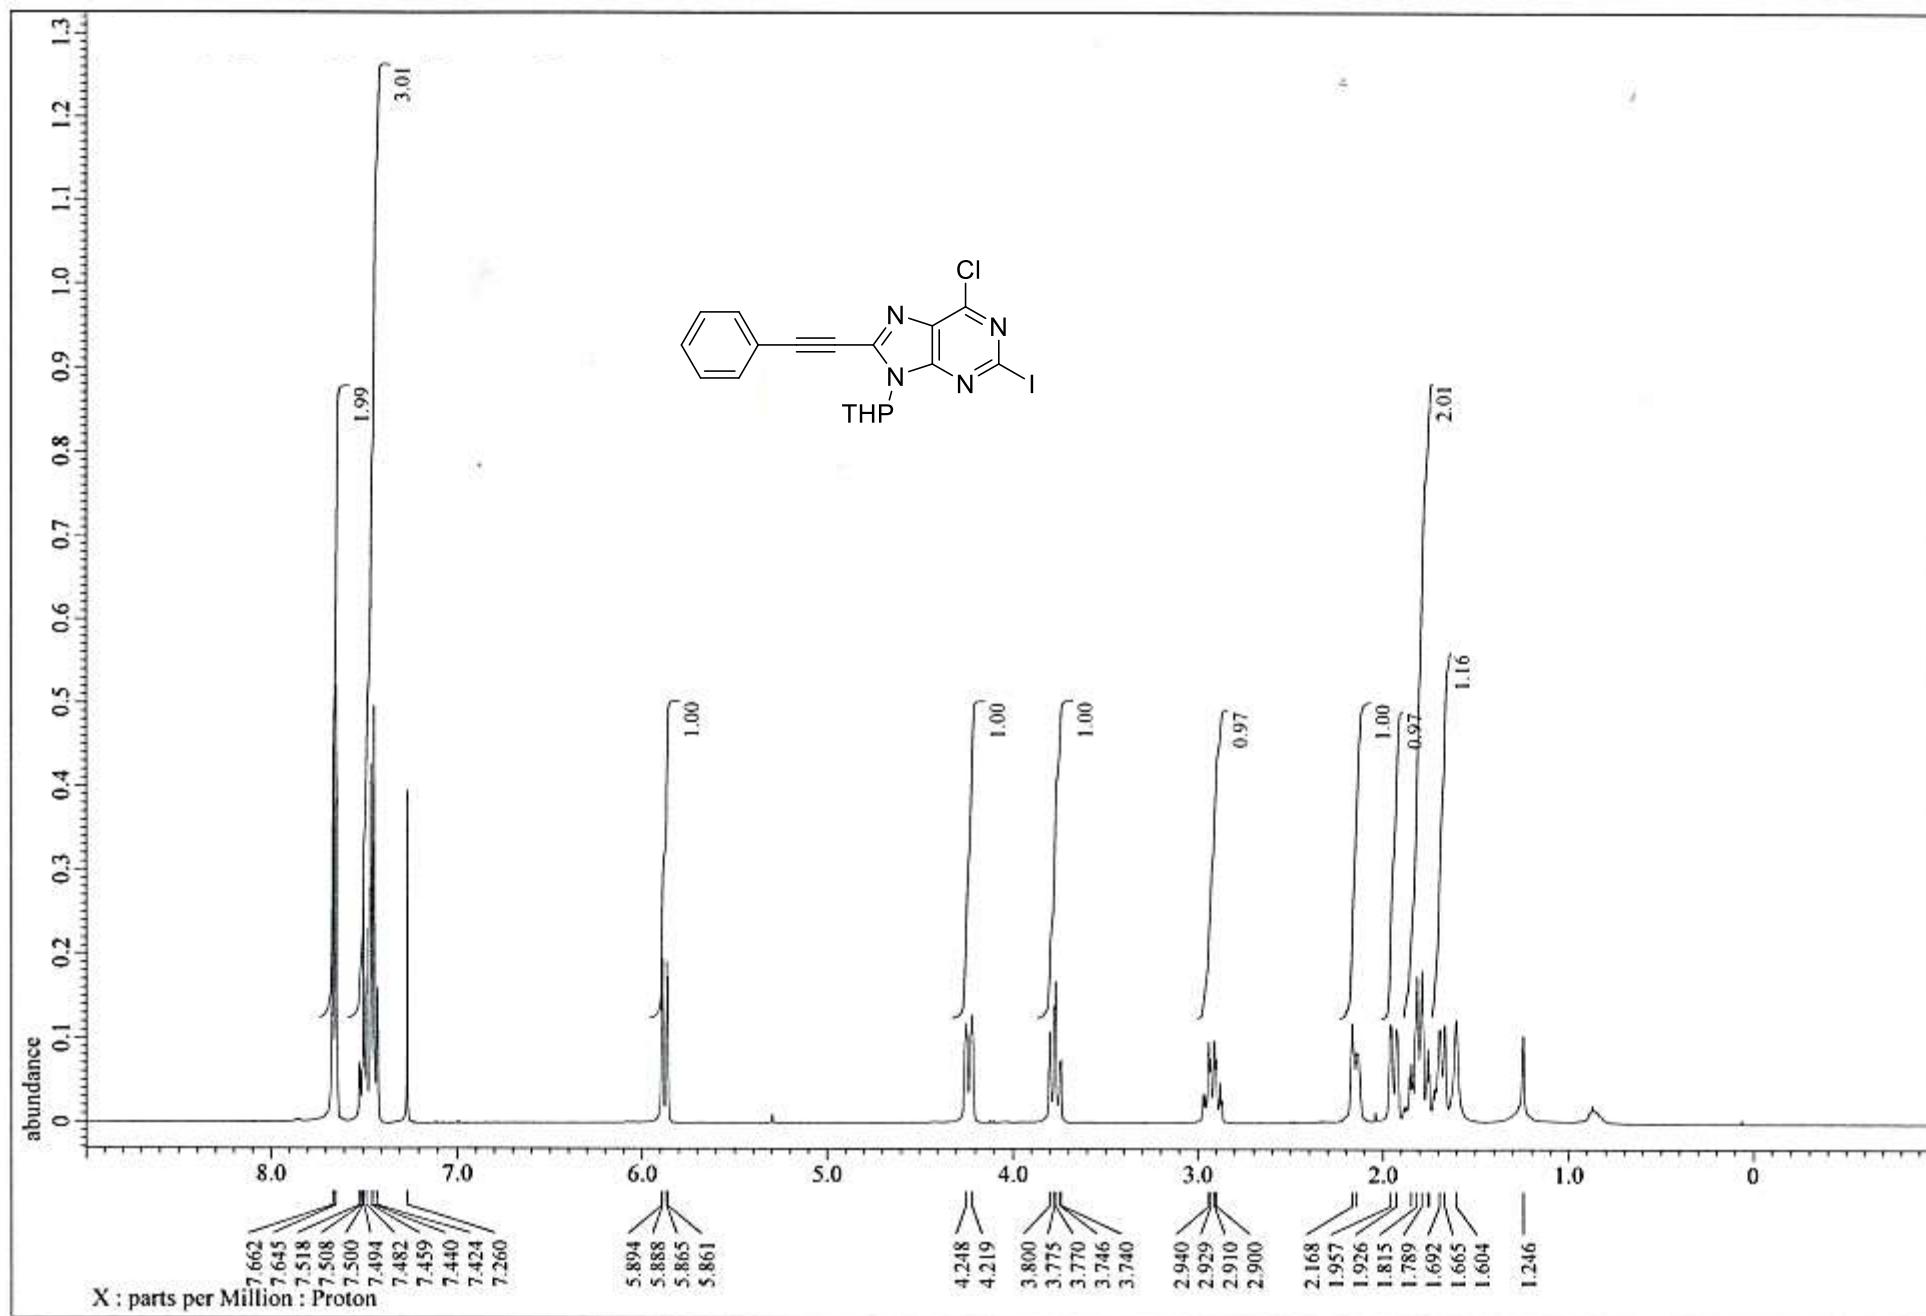

<sup>13</sup>C NMR (100 MHz, CDCl<sub>3</sub>) of **7c**

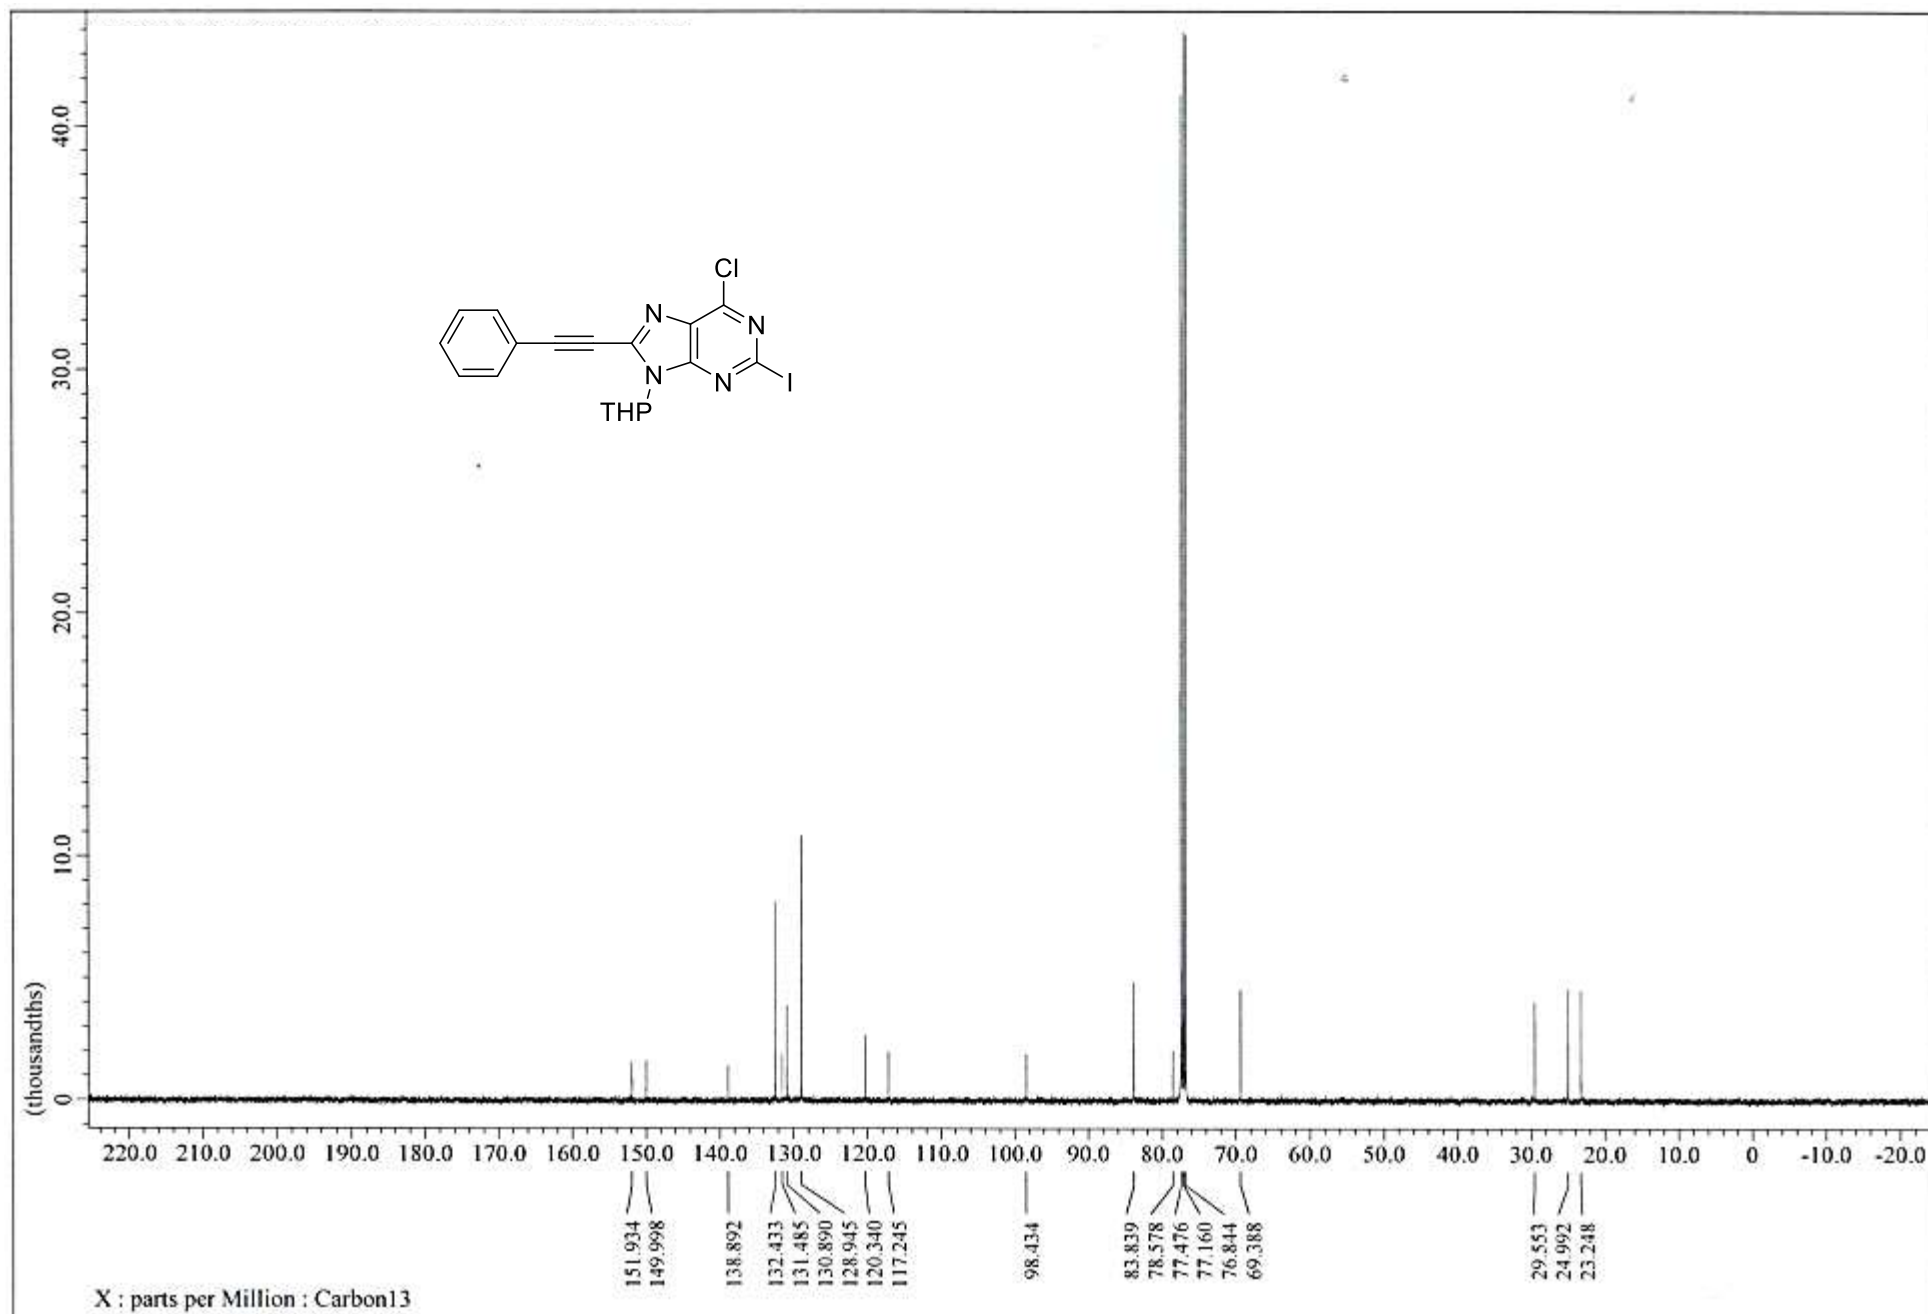

$^1\text{H}$  NMR (400 MHz,  $\text{CDCl}_3$ ) of **8c**

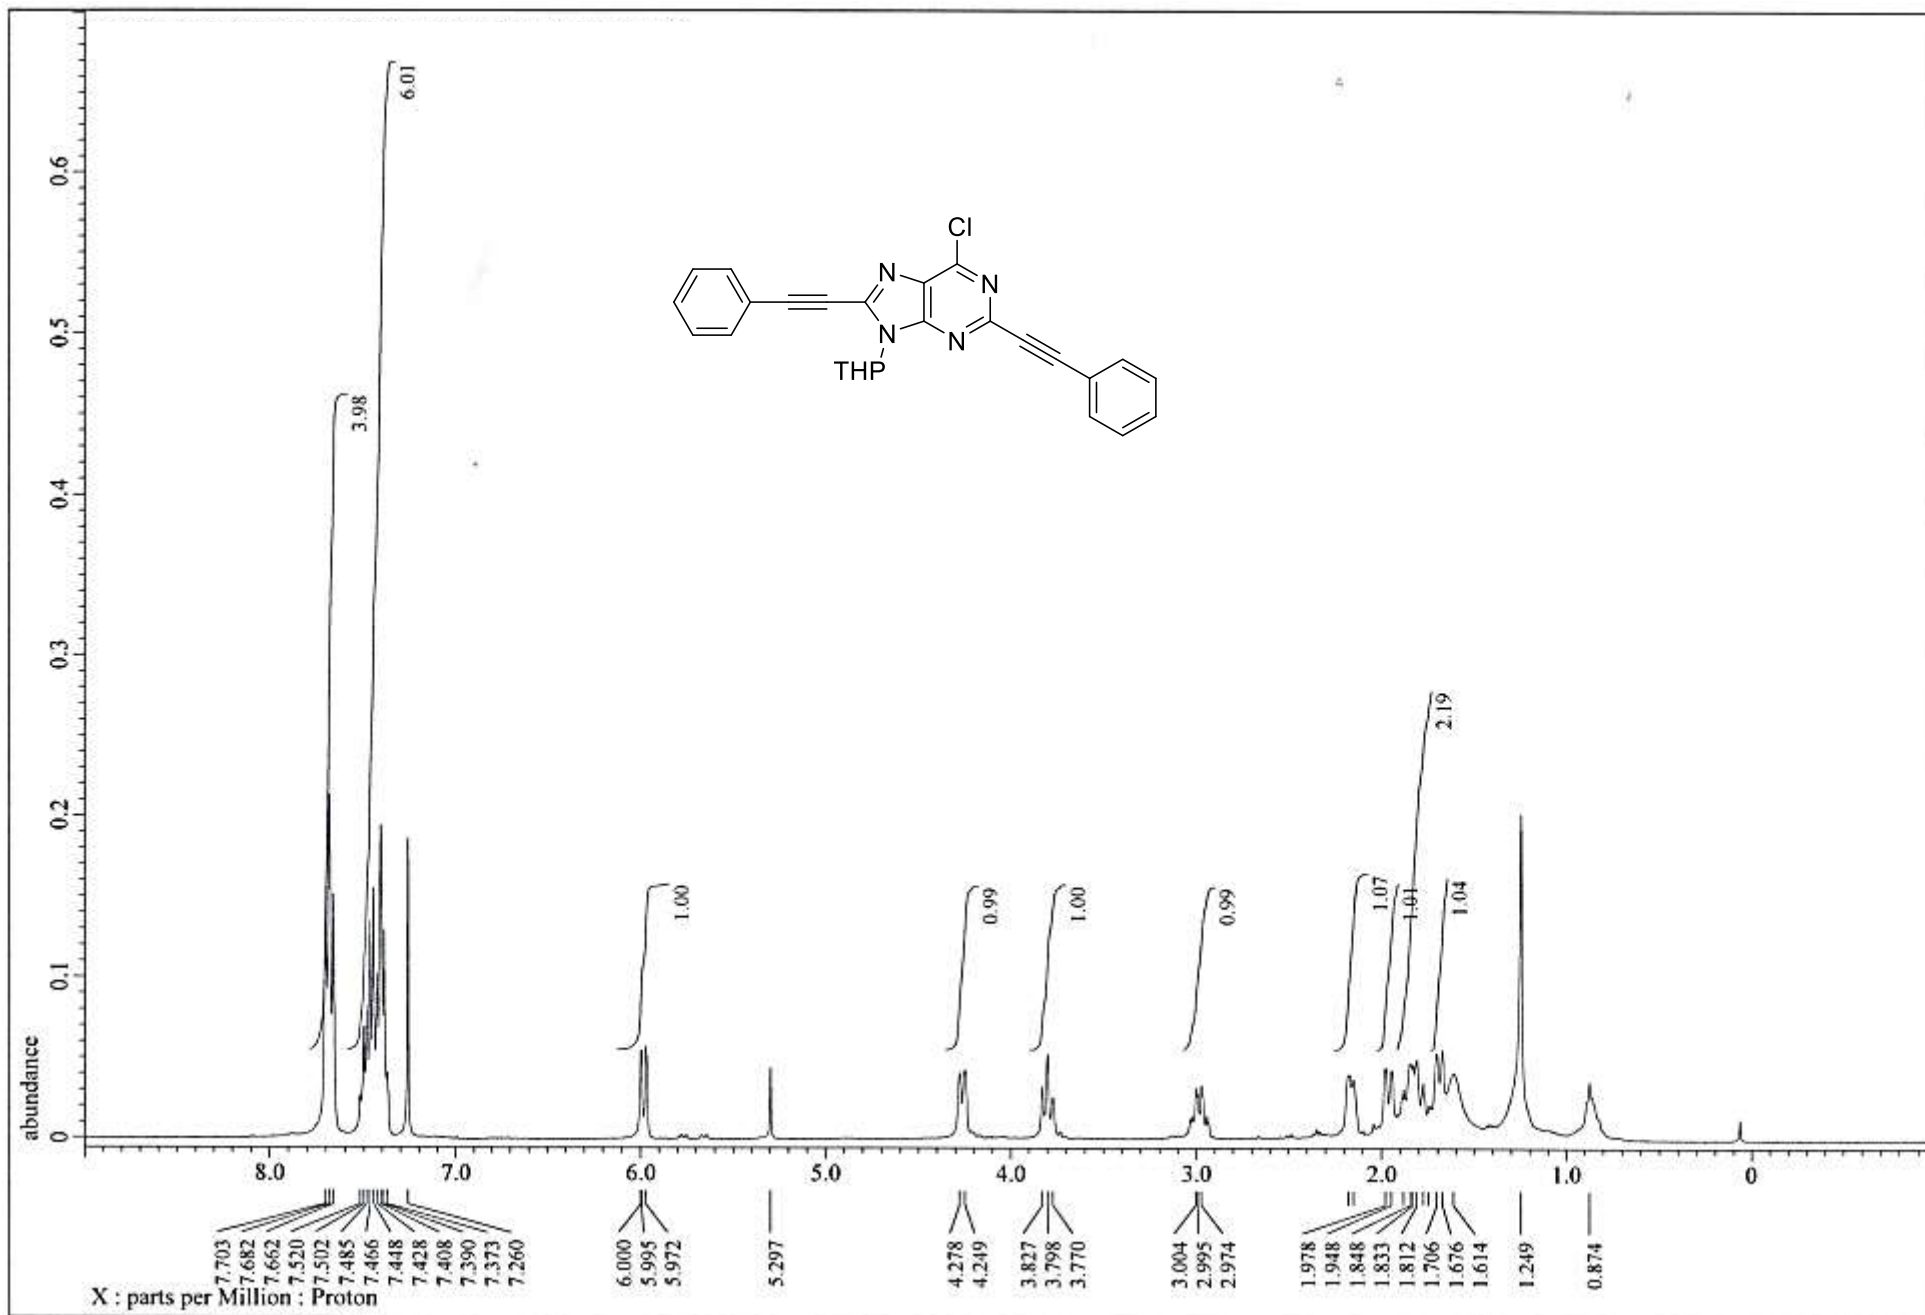

$^{13}\text{C}$  NMR (100 MHz,  $\text{CDCl}_3$ ) of **8c**

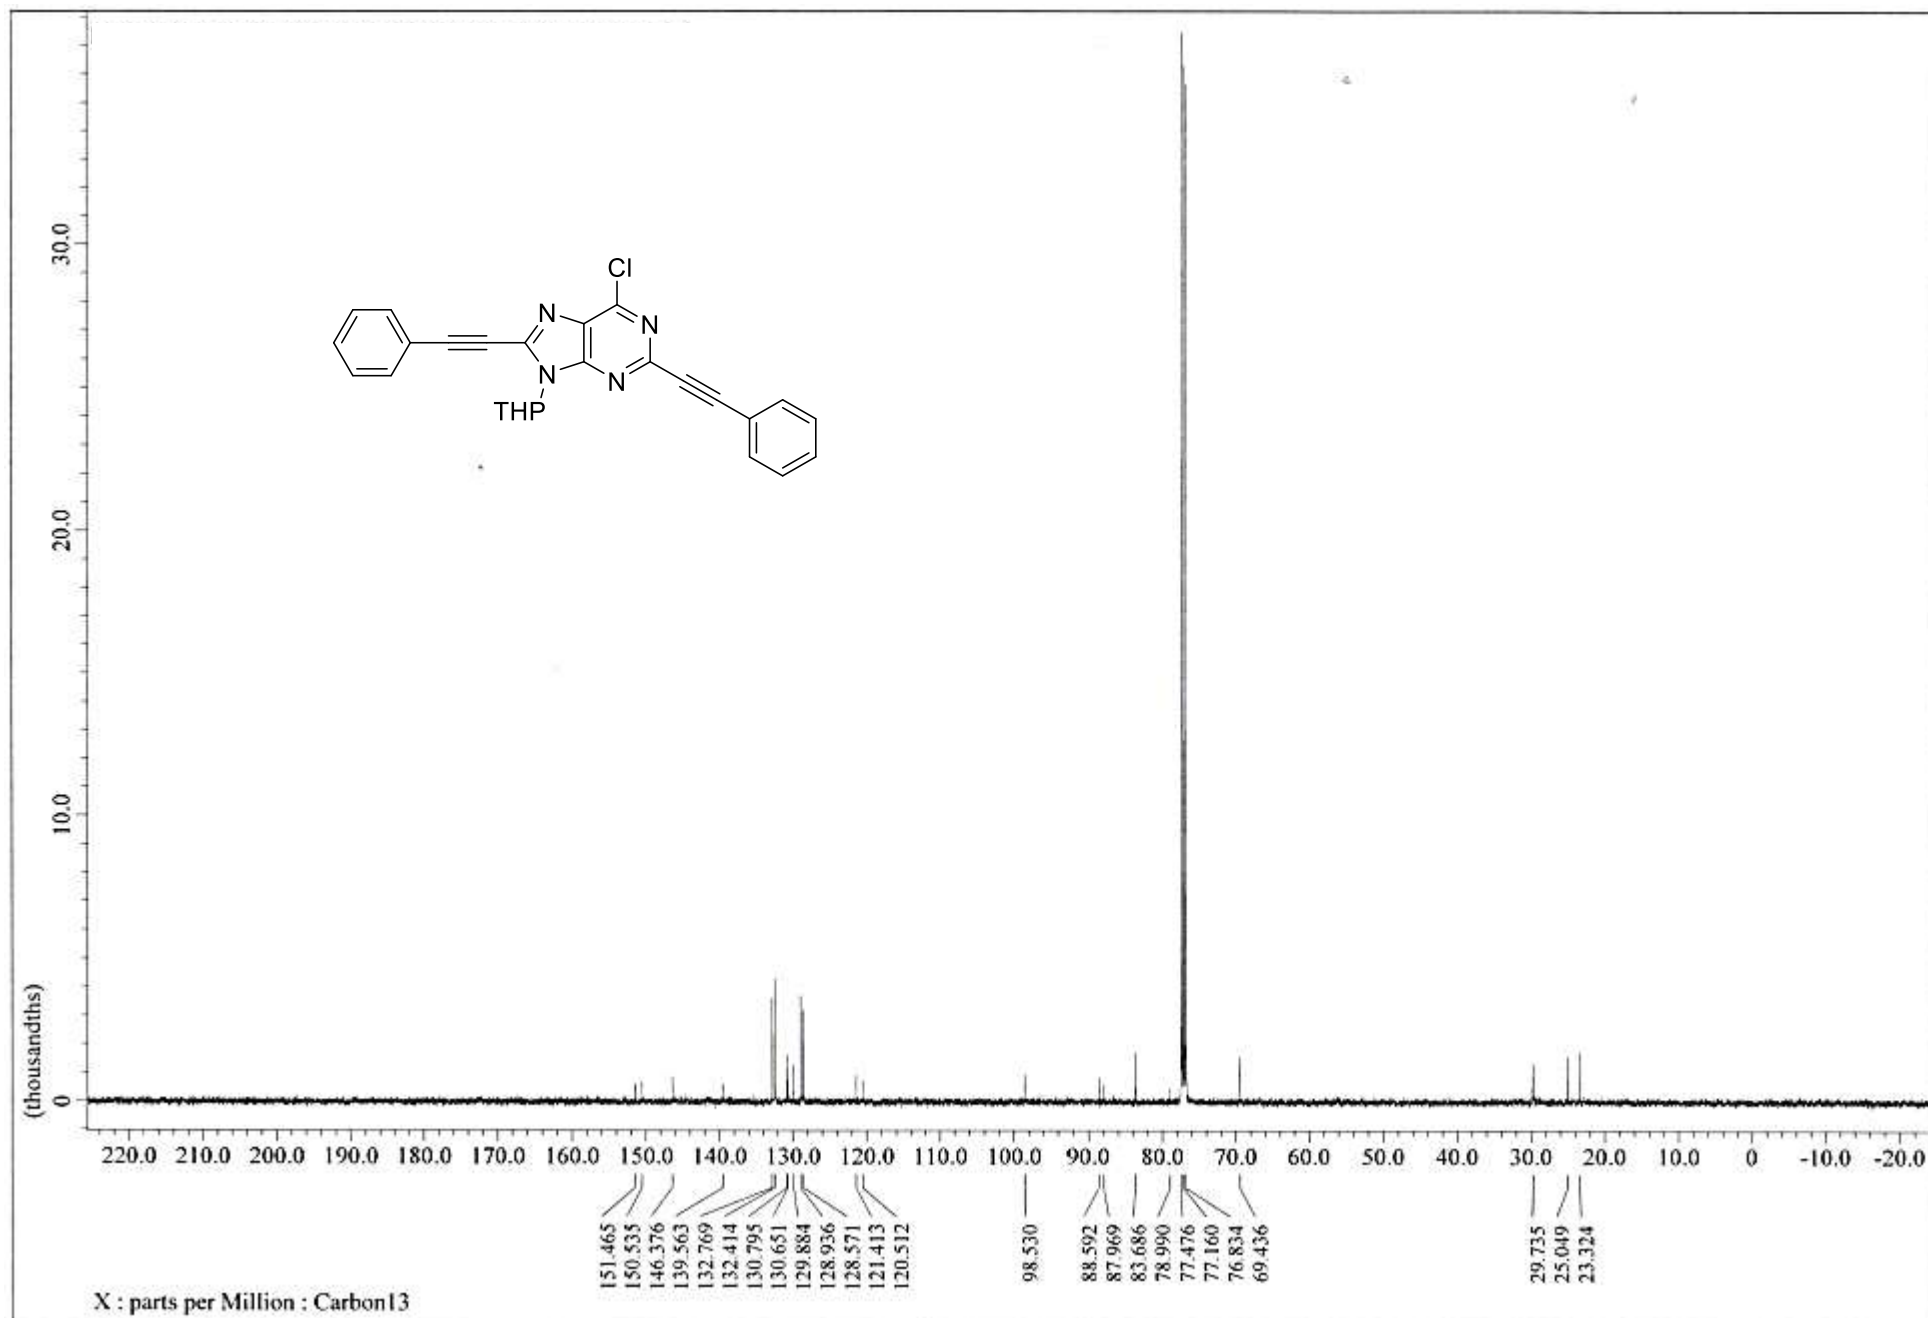



$^1\text{H}$  NMR (400 MHz,  $\text{CDCl}_3$ ) of **6d**

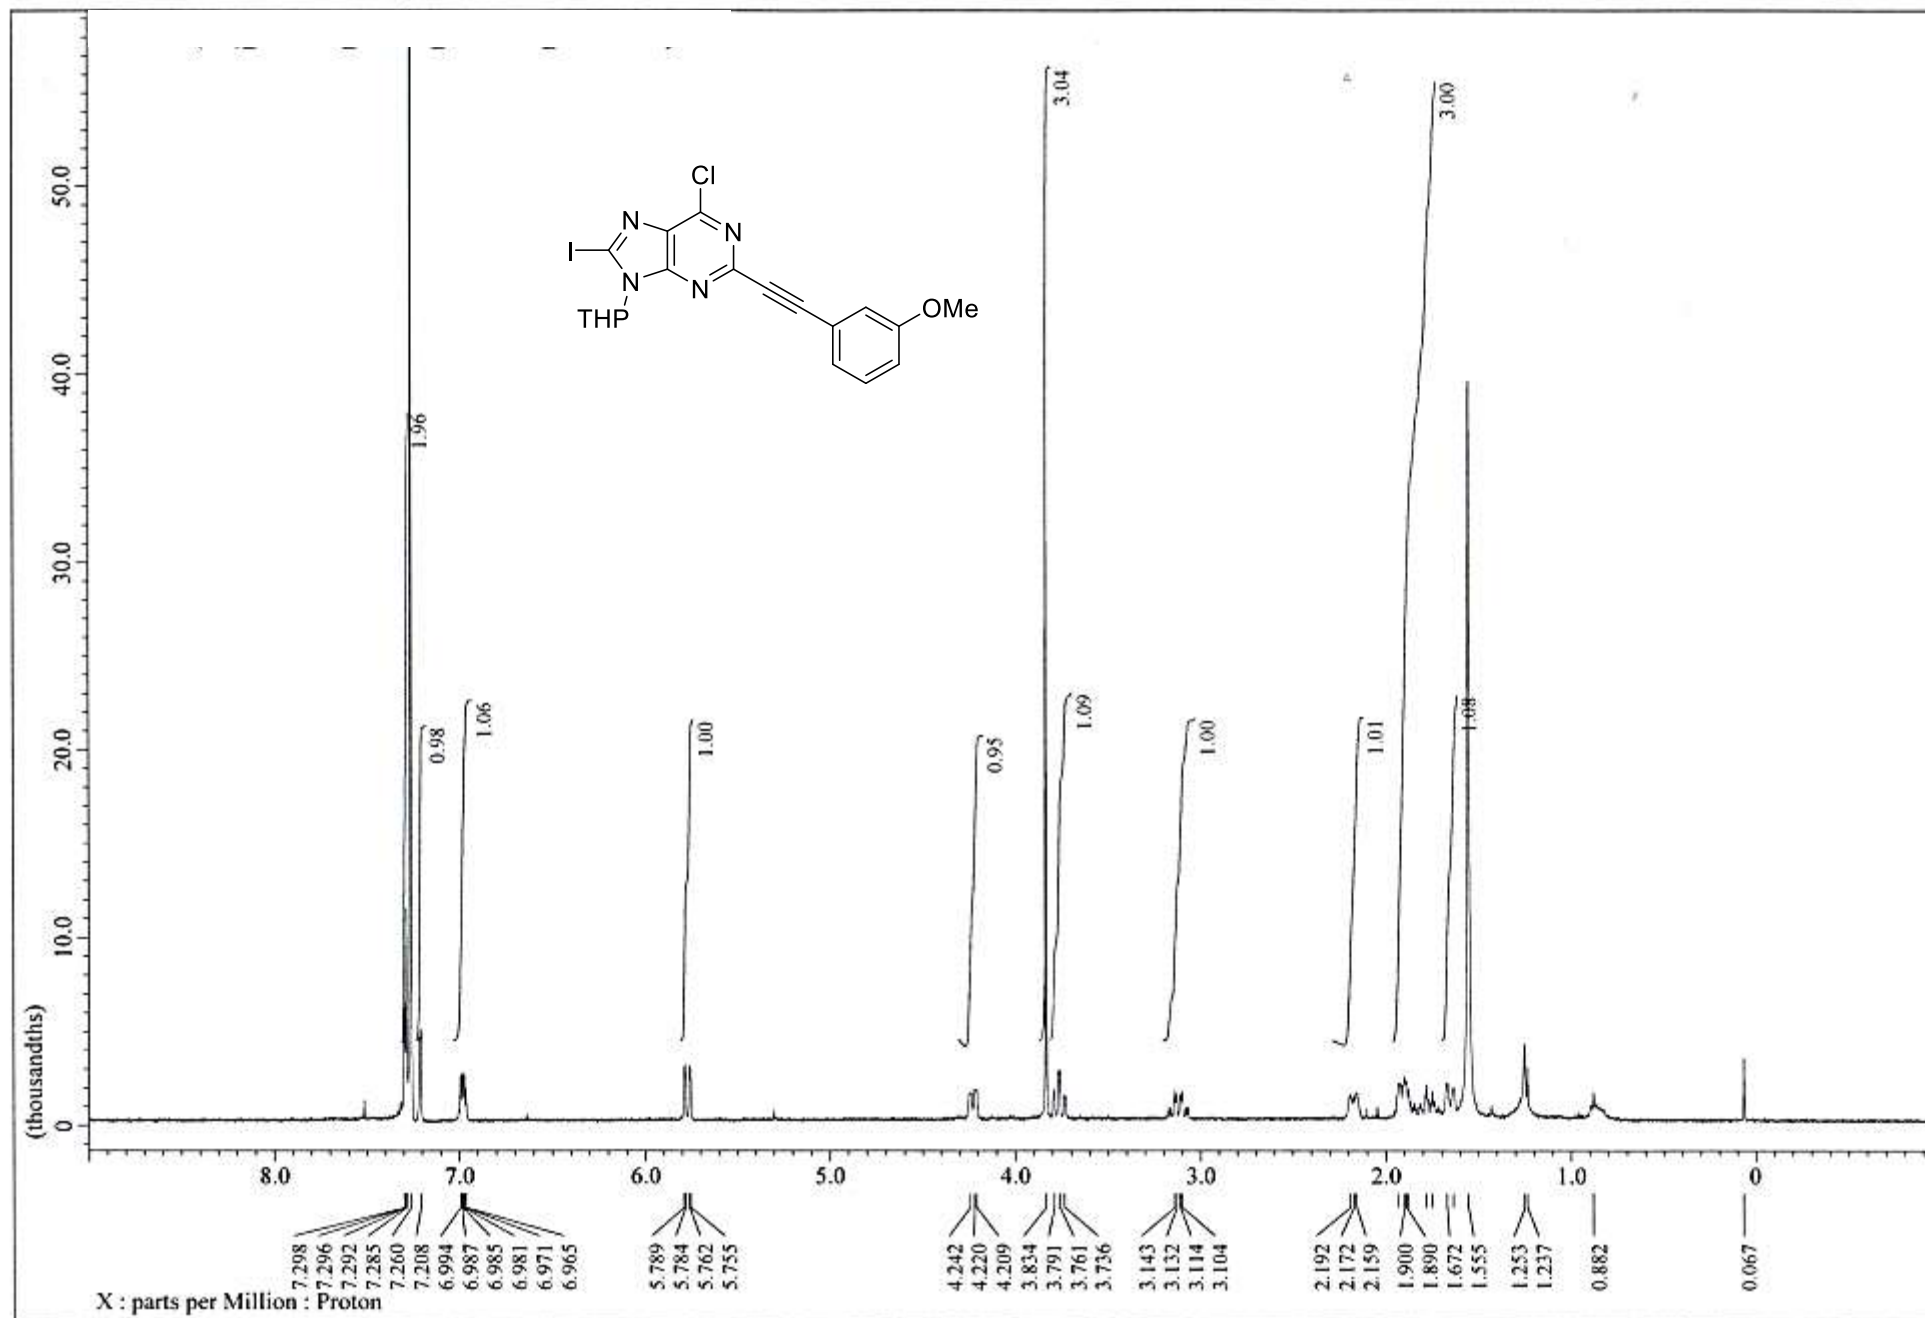

<sup>13</sup>C NMR (100 MHz, CDCl<sub>3</sub>) of **6d**

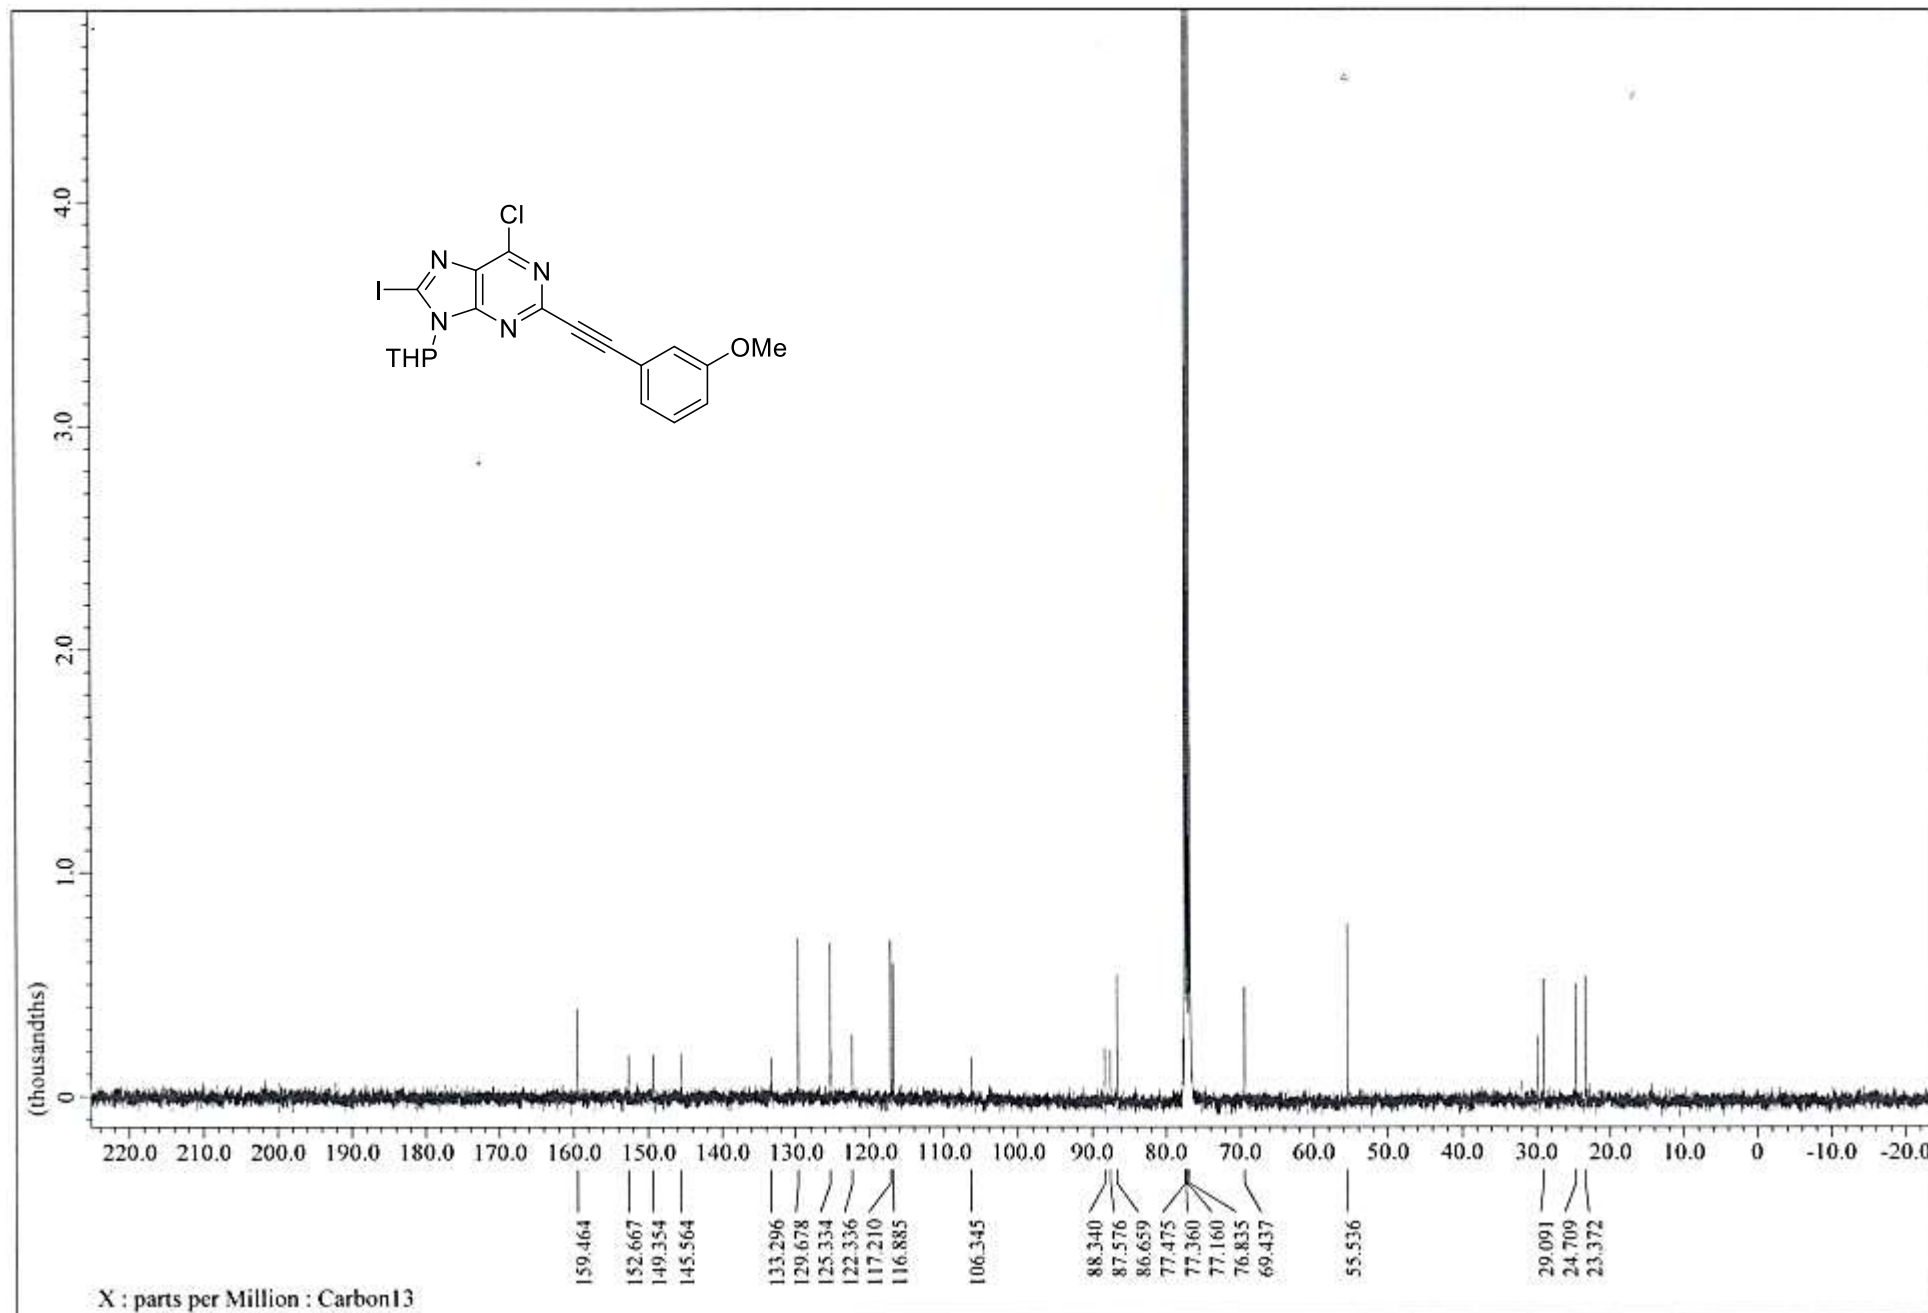

<sup>1</sup>H NMR (400 MHz, CDCl<sub>3</sub>) of **7d**

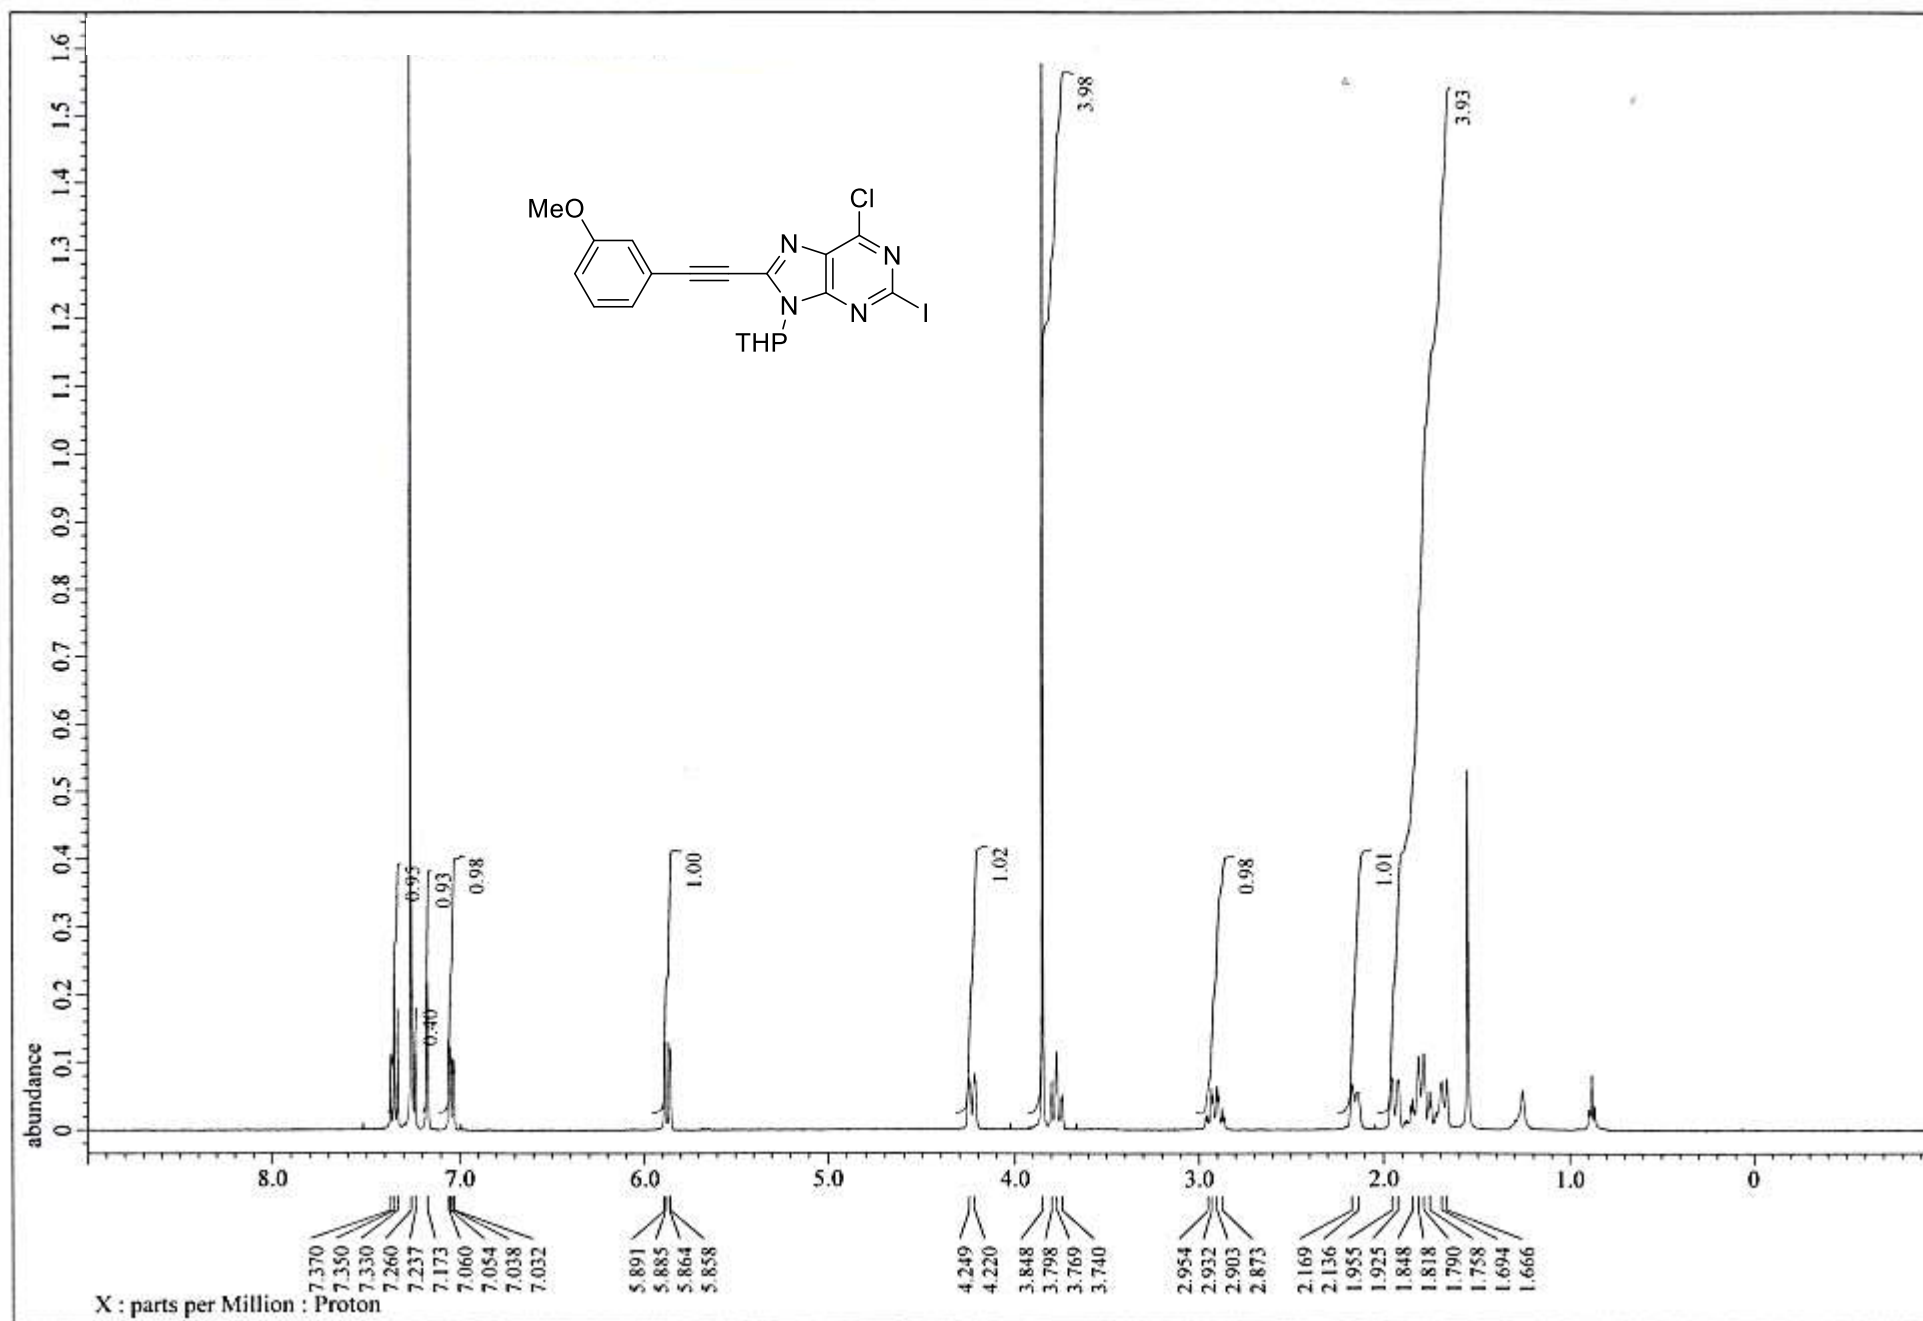

<sup>13</sup>C NMR (100 MHz, CDCl<sub>3</sub>) of **7d**

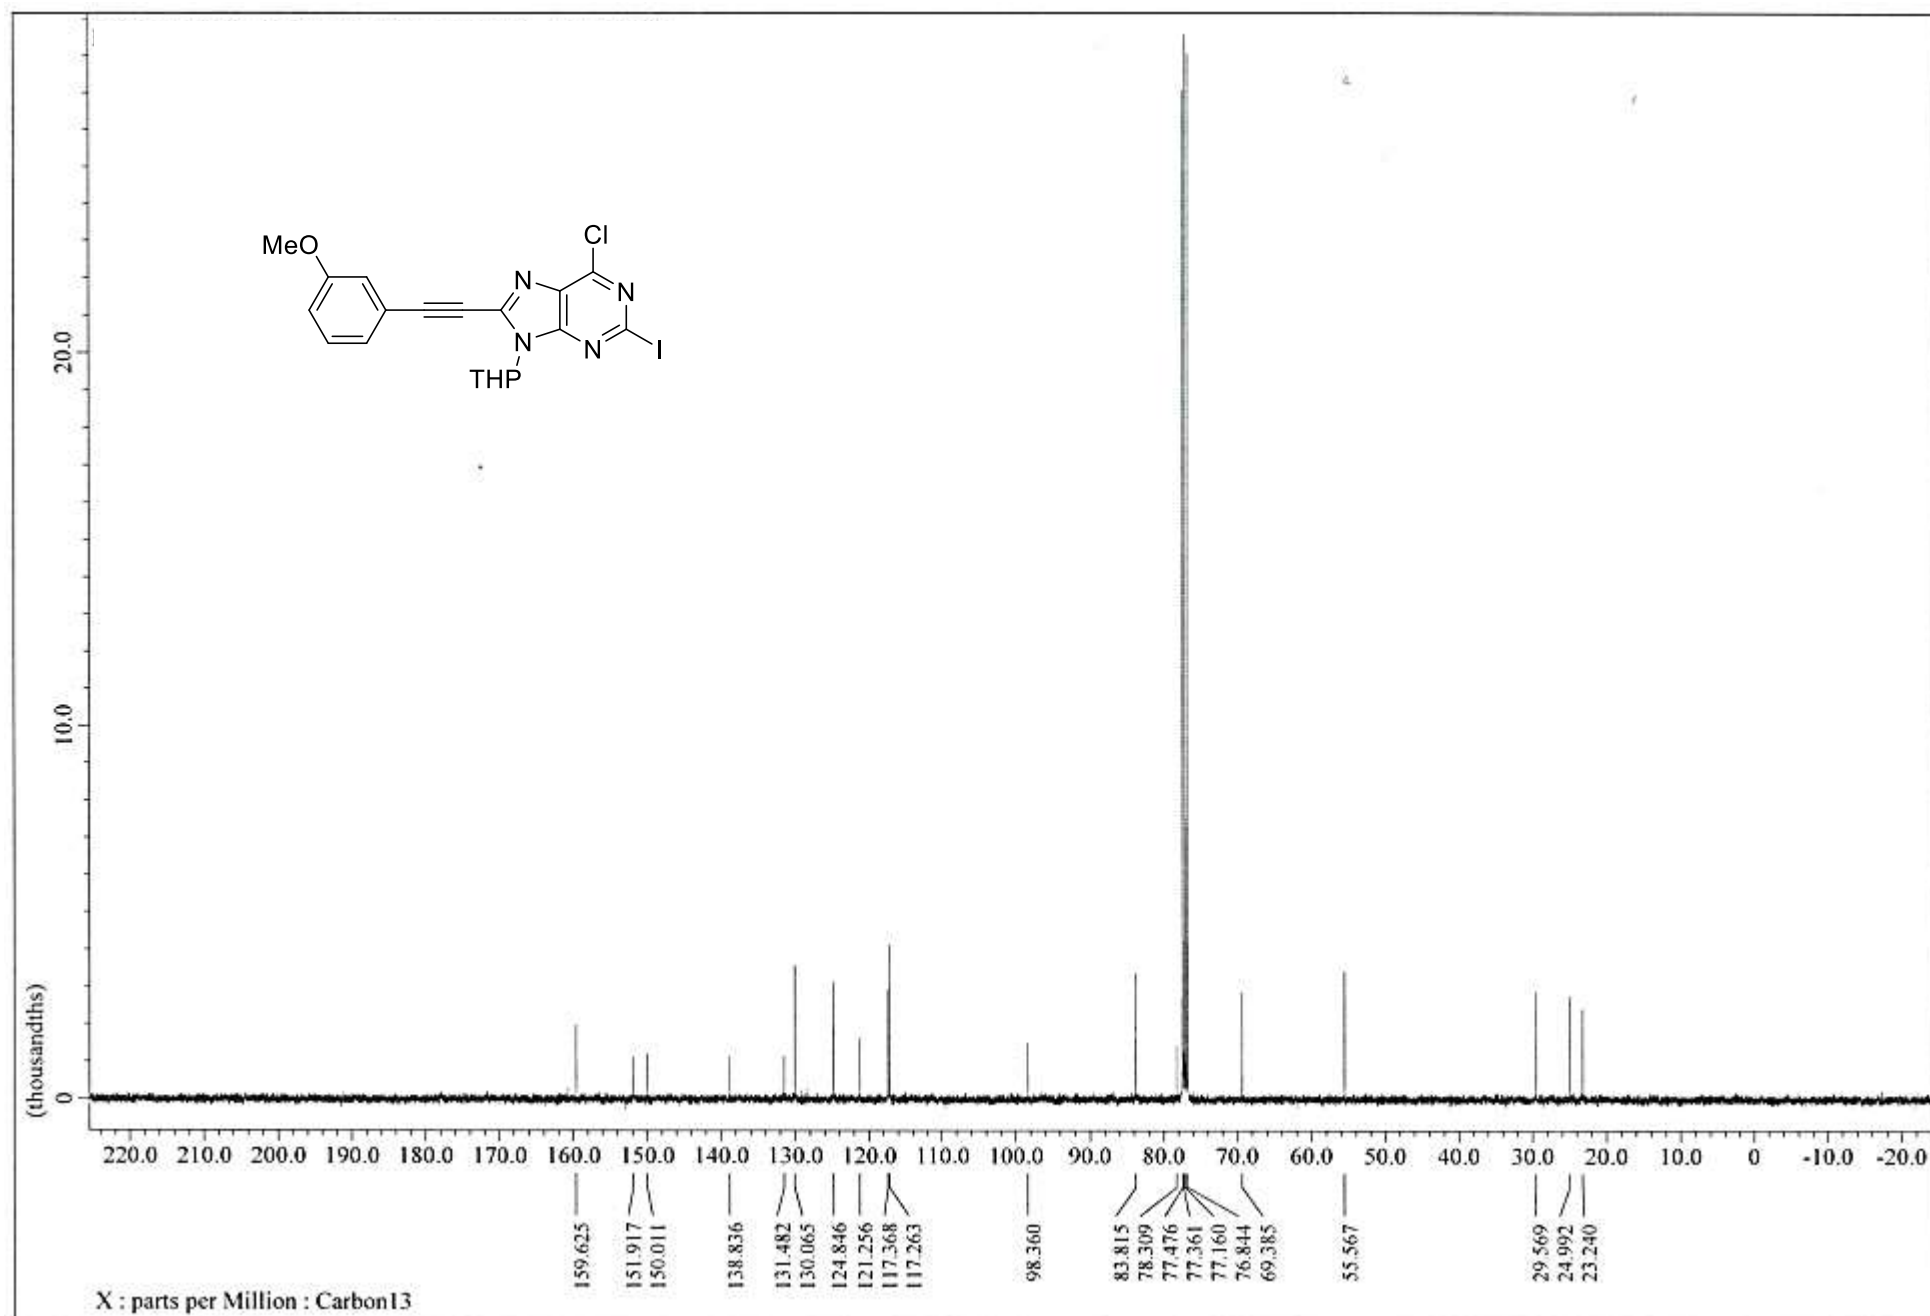

$^1\text{H}$  NMR (400 MHz,  $\text{CDCl}_3$ ) of **8d**

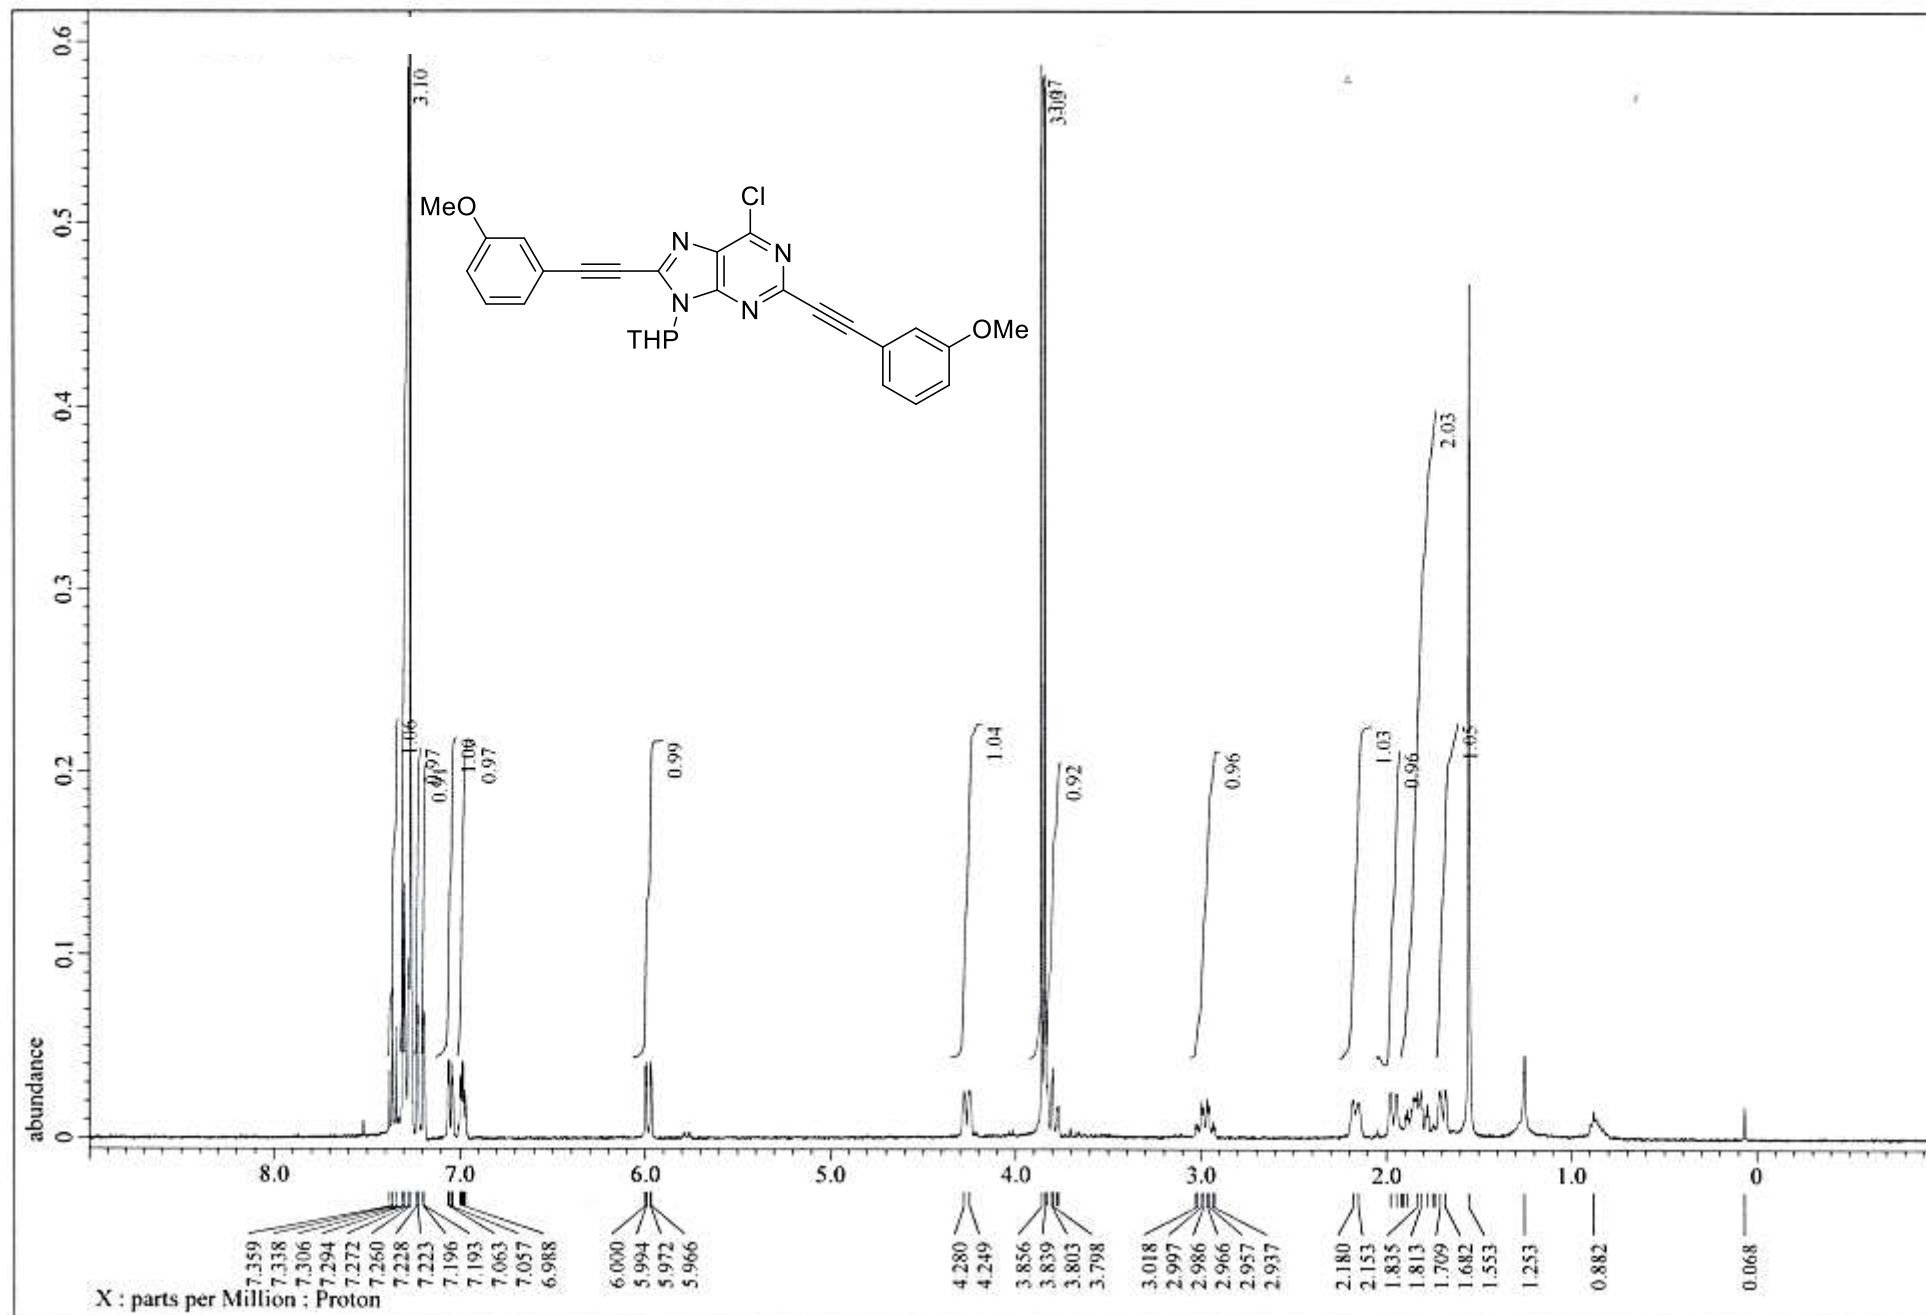

<sup>13</sup>C NMR (100 MHz, CDCl<sub>3</sub>) of **8d**

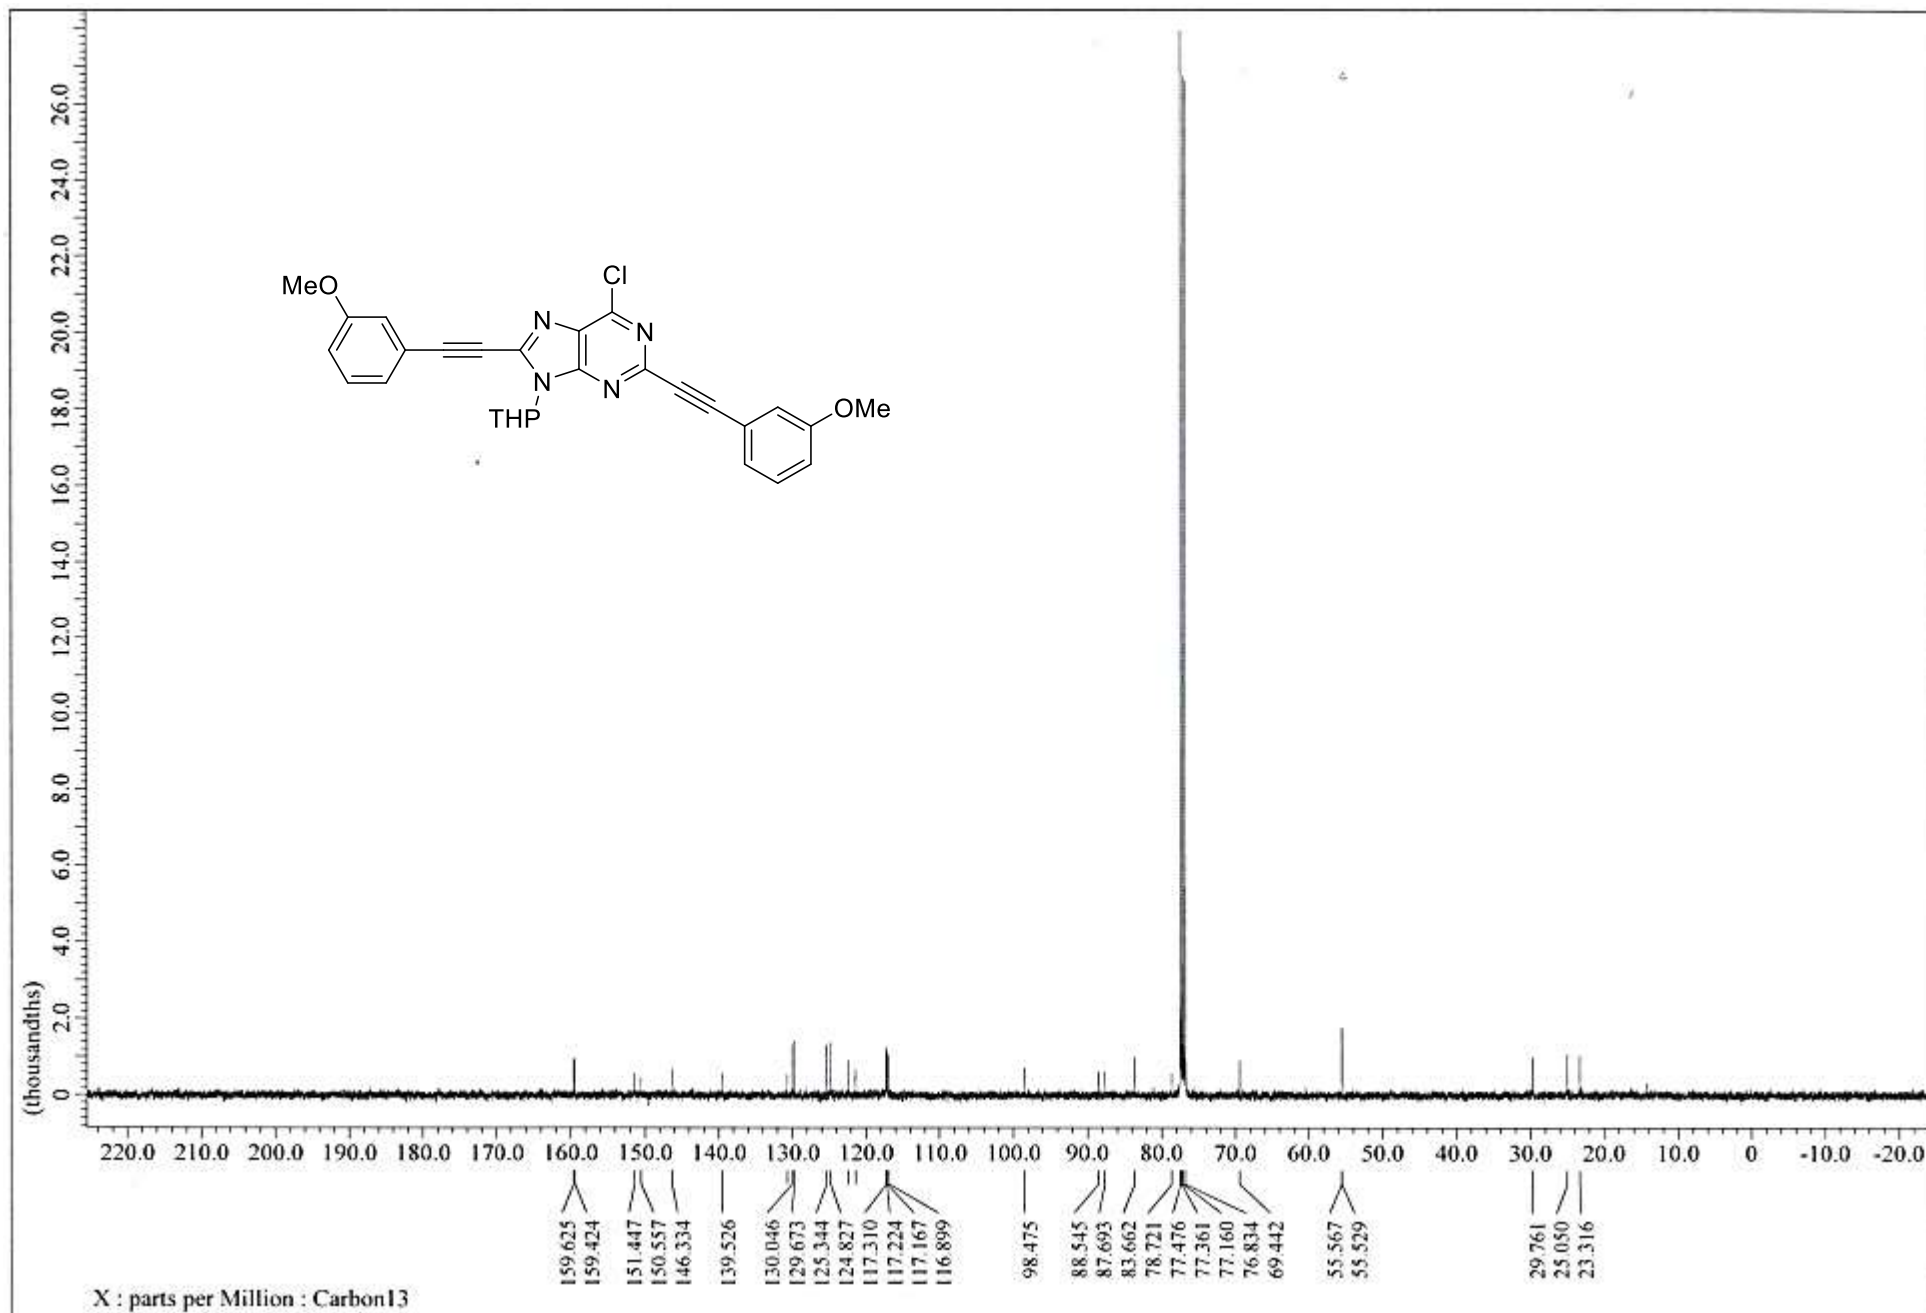

<sup>1</sup>H NMR (400 MHz, CDCl<sub>3</sub>) of **6e**

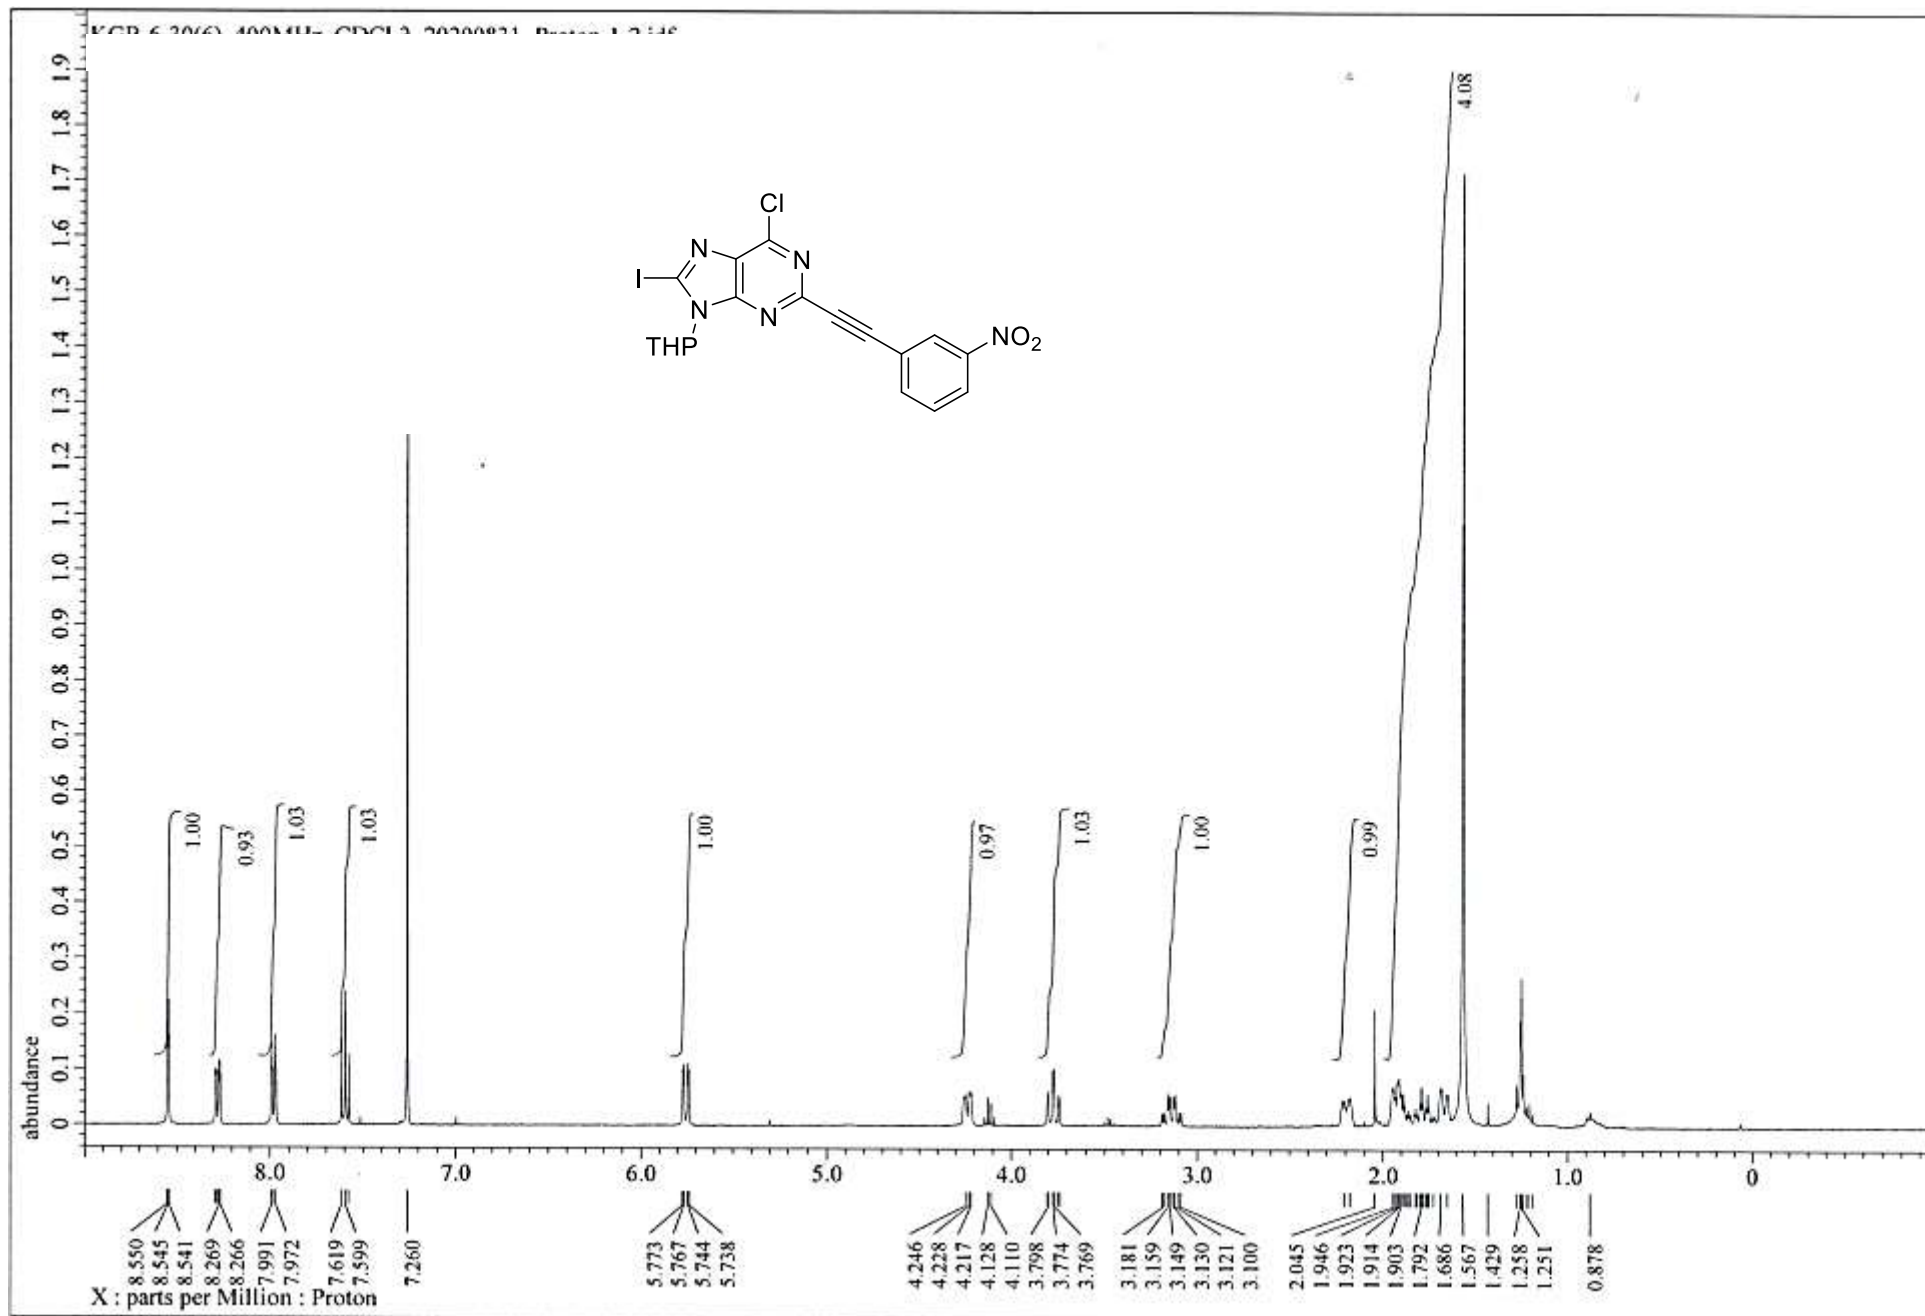

<sup>13</sup>C NMR (100 MHz, CDCl<sub>3</sub>) of **6e**

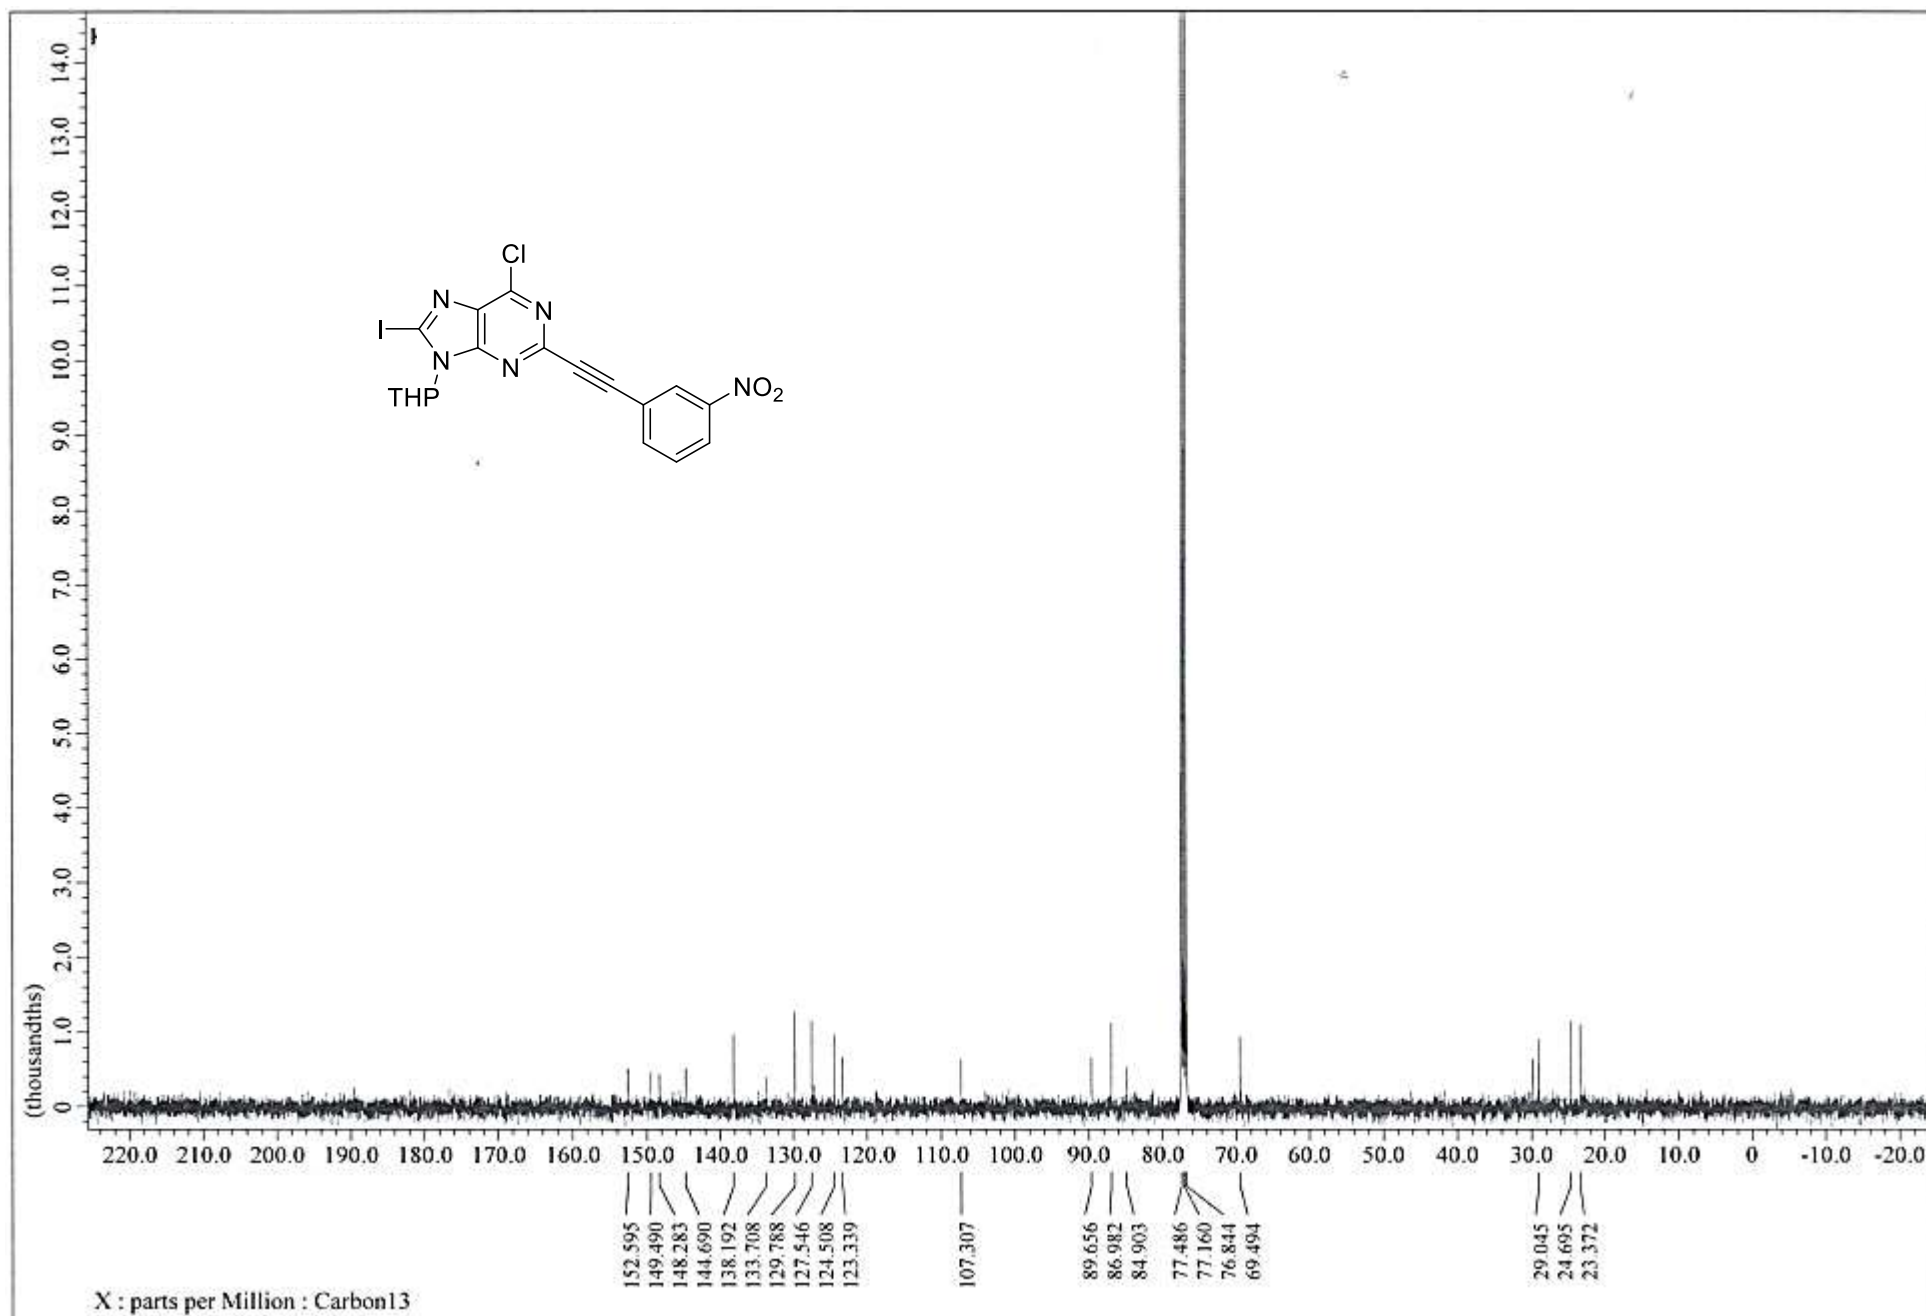



<sup>1</sup>H NMR (400 MHz, CDCl<sub>3</sub>) of **7e**

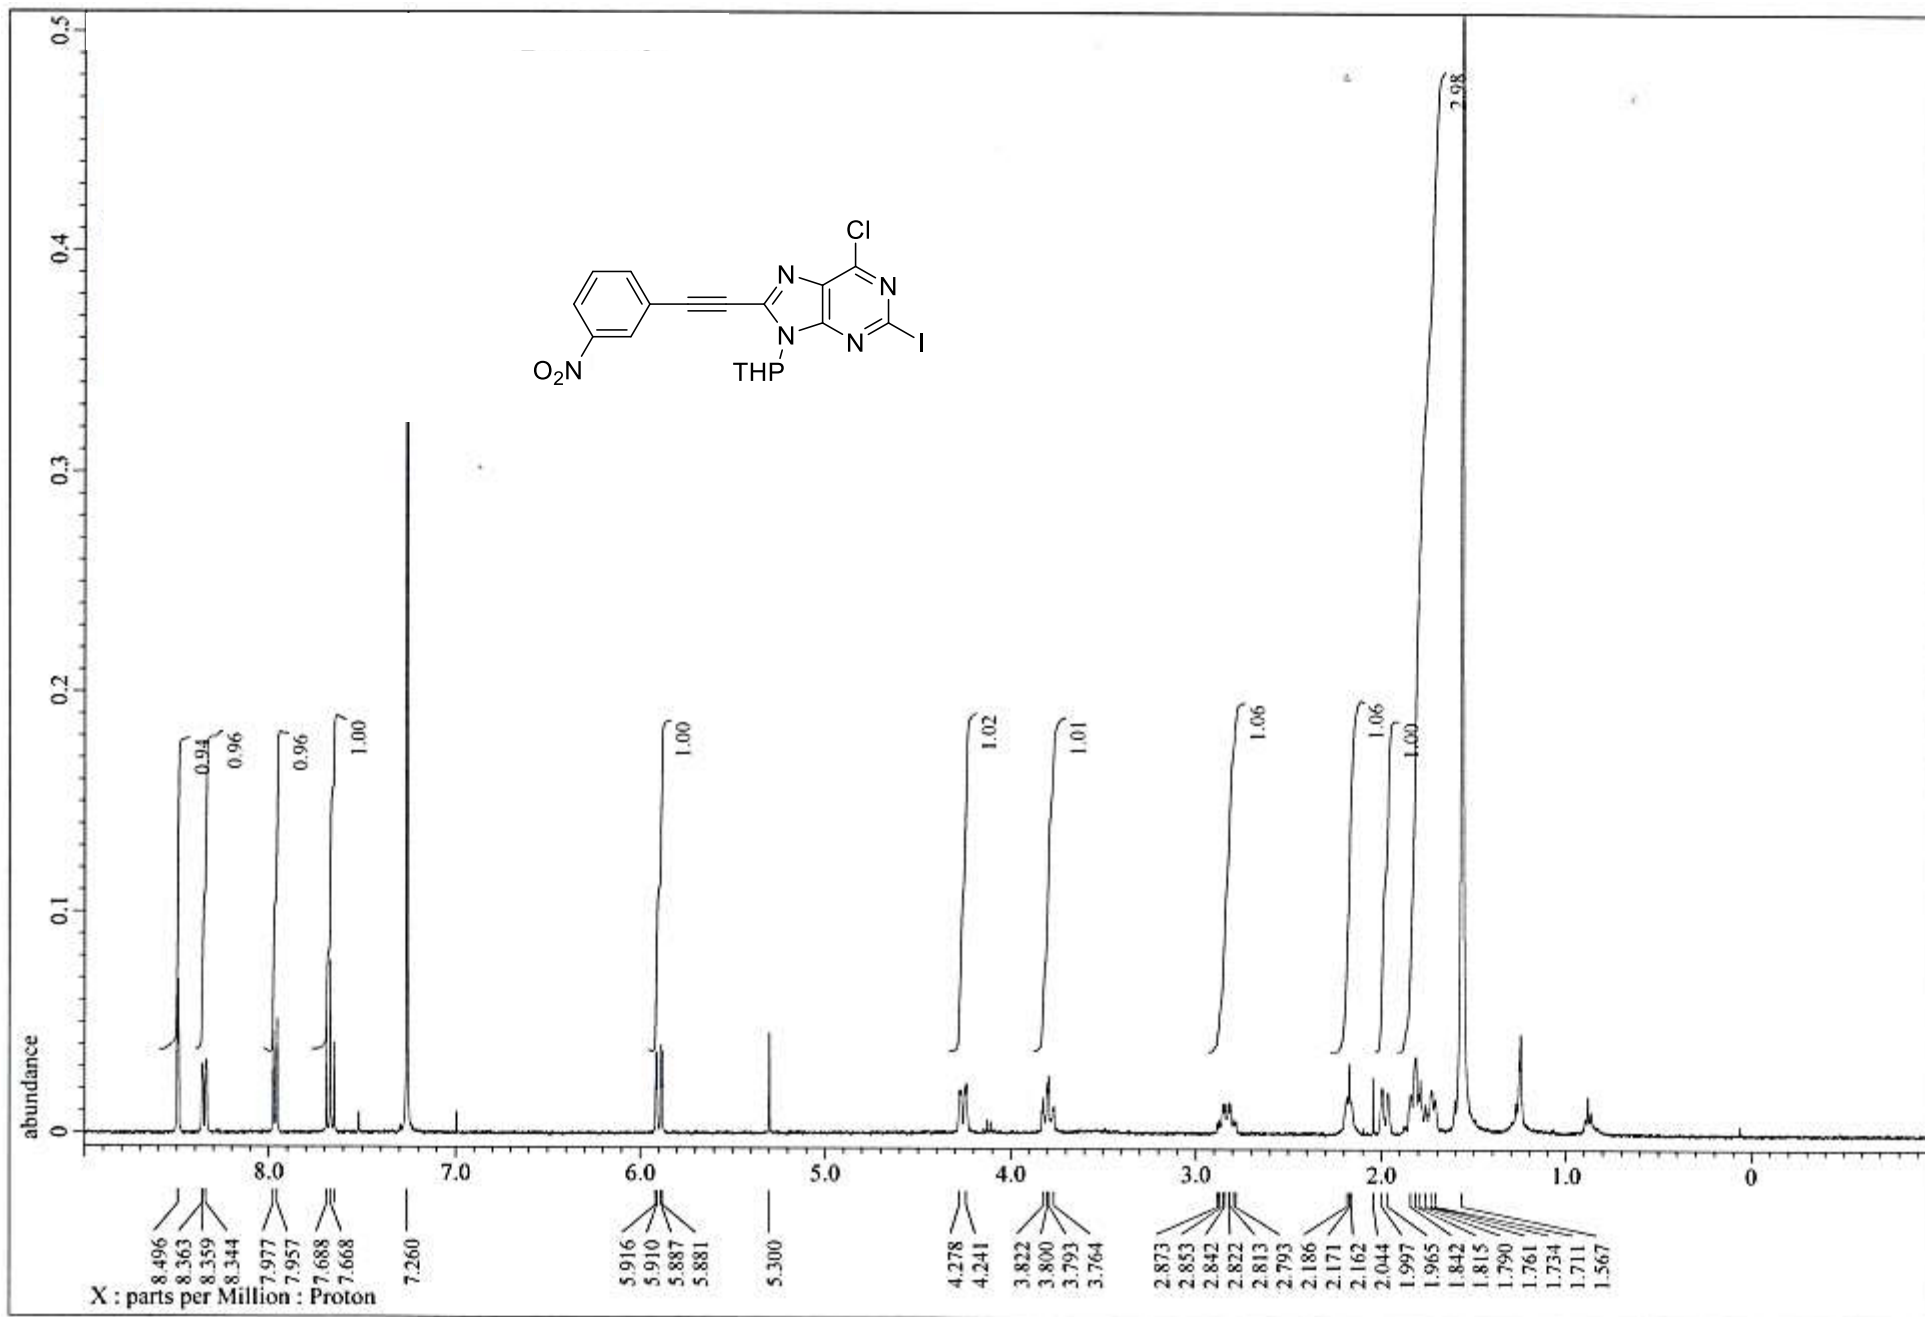

<sup>13</sup>C NMR (100 MHz, CDCl<sub>3</sub>) of **7e**

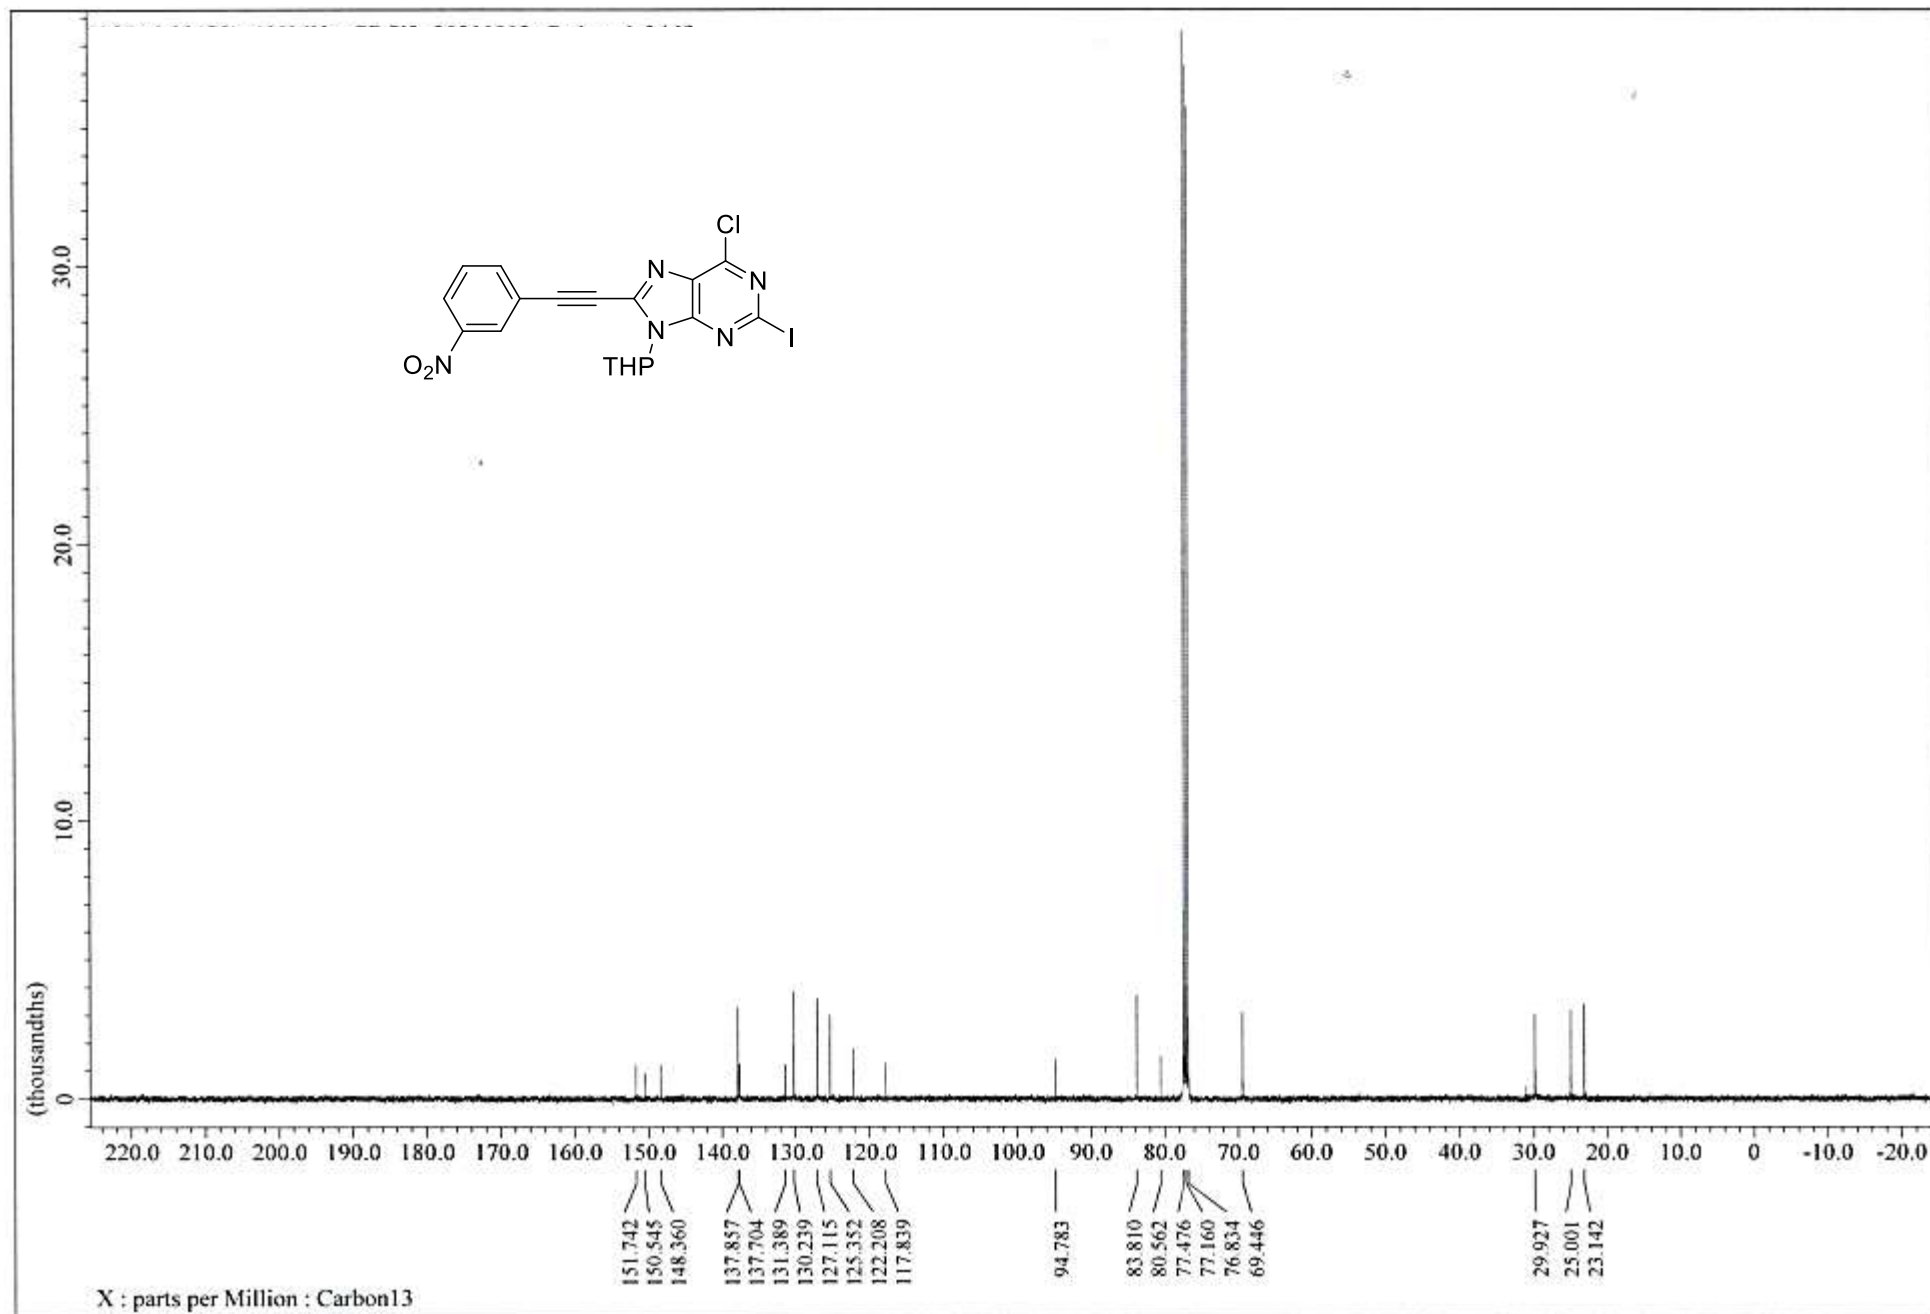

<sup>1</sup>H NMR (400 MHz, CDCl<sub>3</sub>) of **8e**

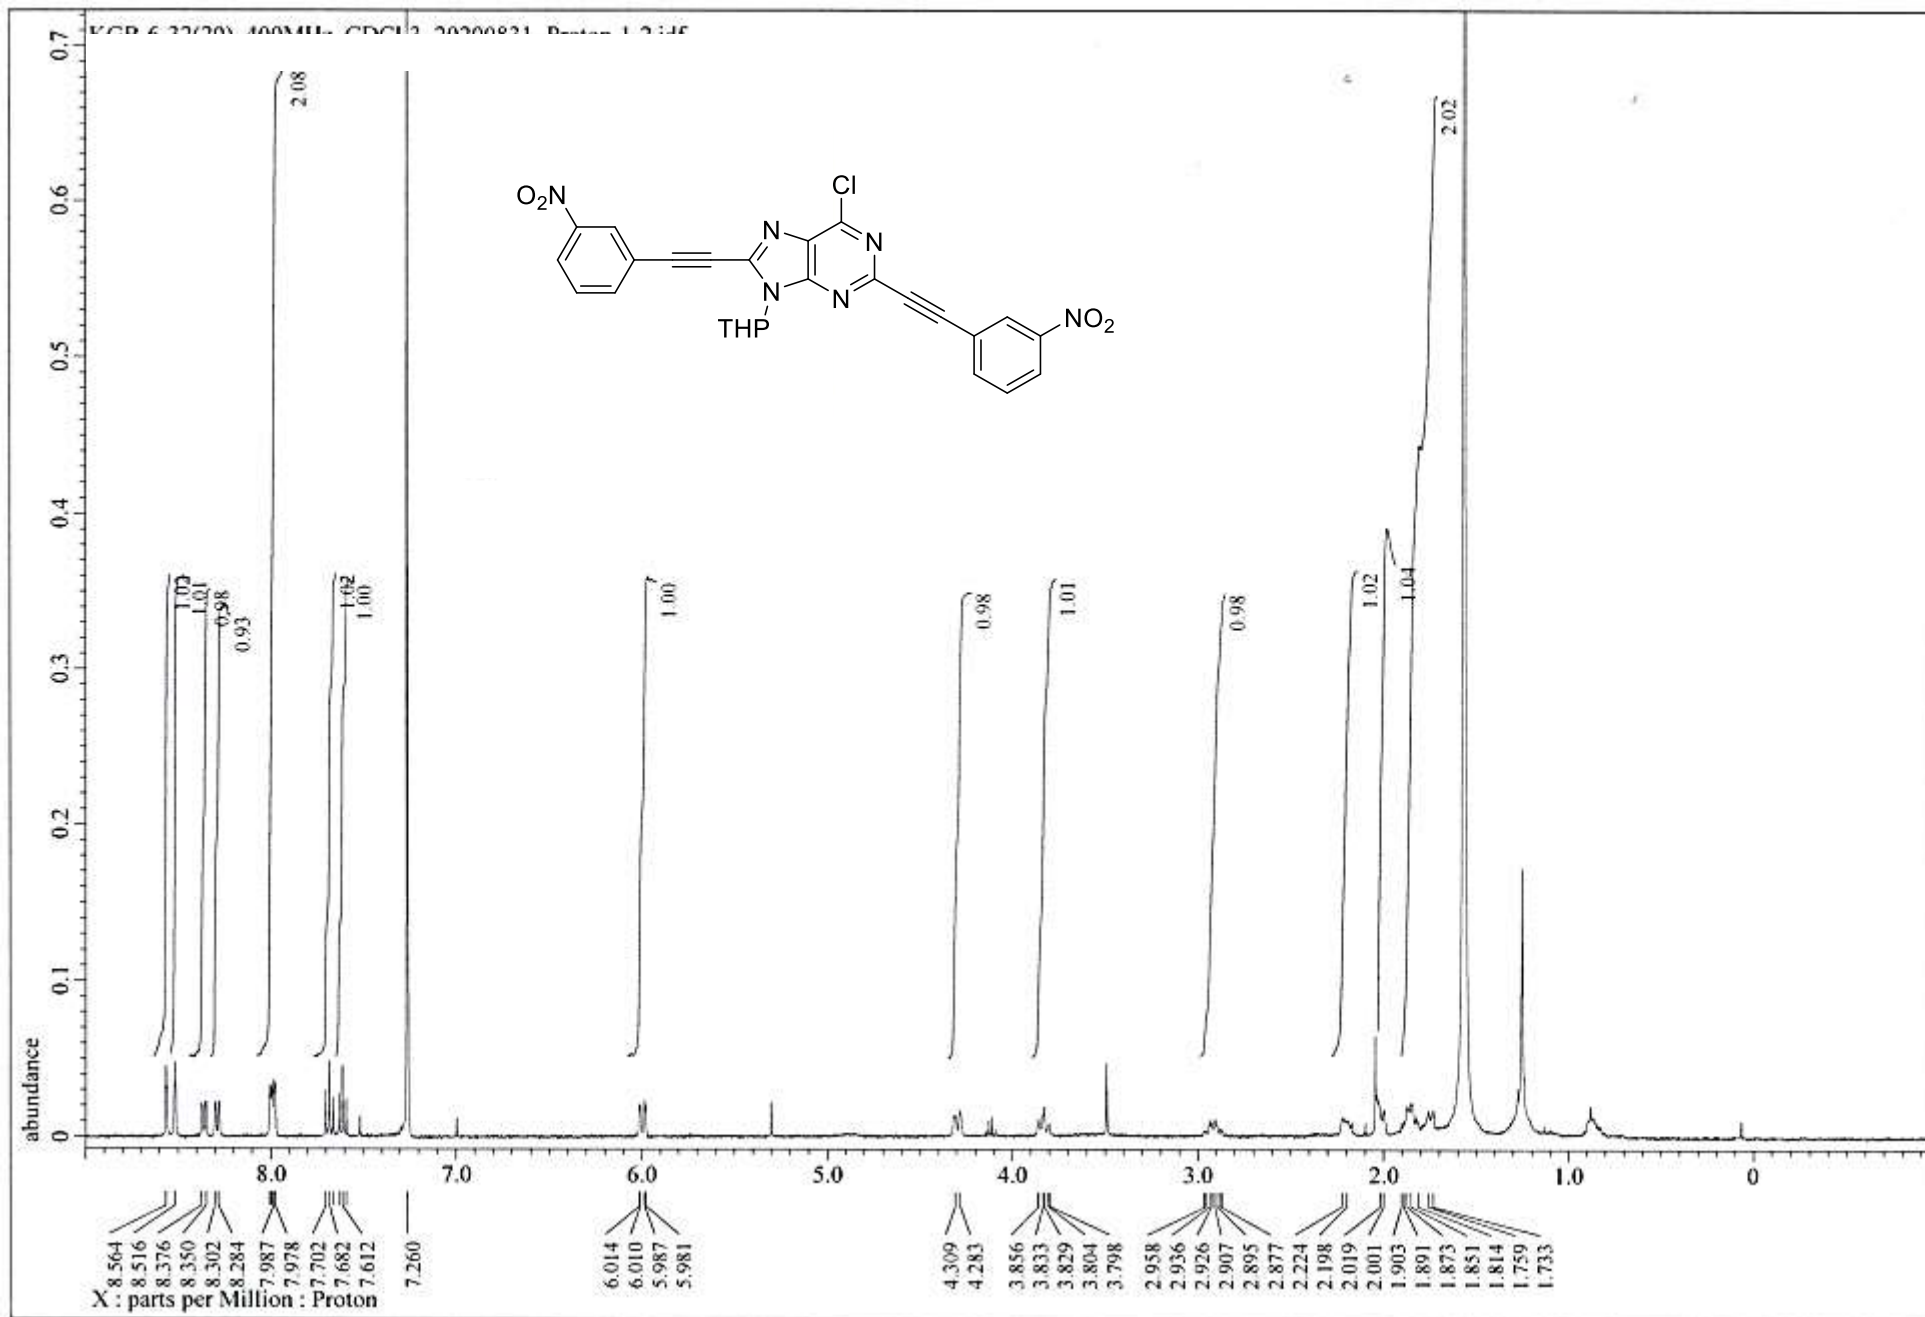

<sup>13</sup>C NMR (100 MHz, CDCl<sub>3</sub>) of **8e**

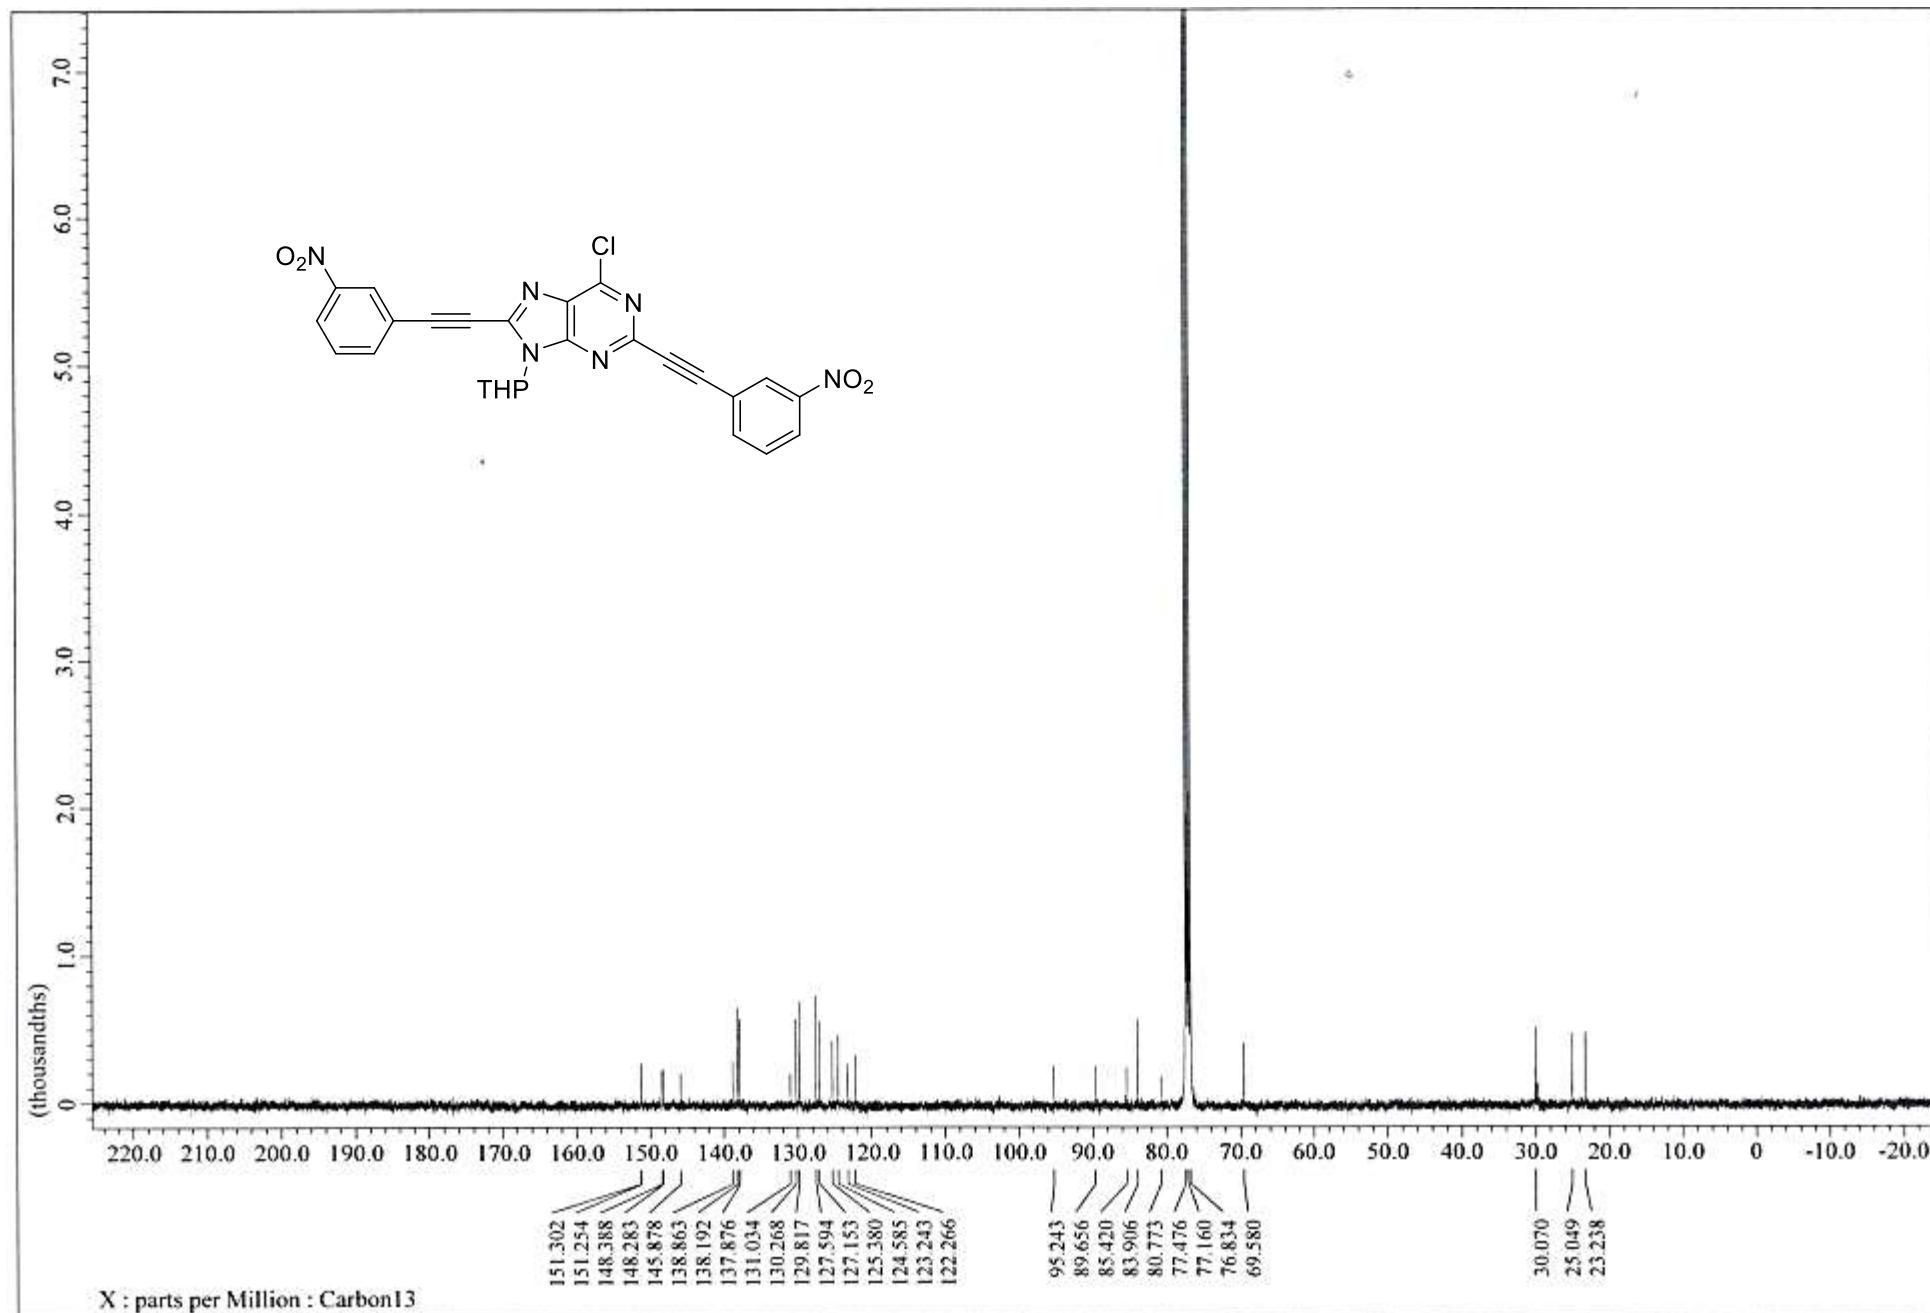

$^{13}\text{C}$  NMR (200 MHz,  $\text{DMSO-}d_6$ ) of **9**

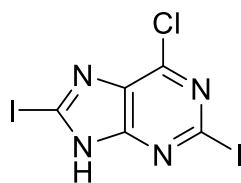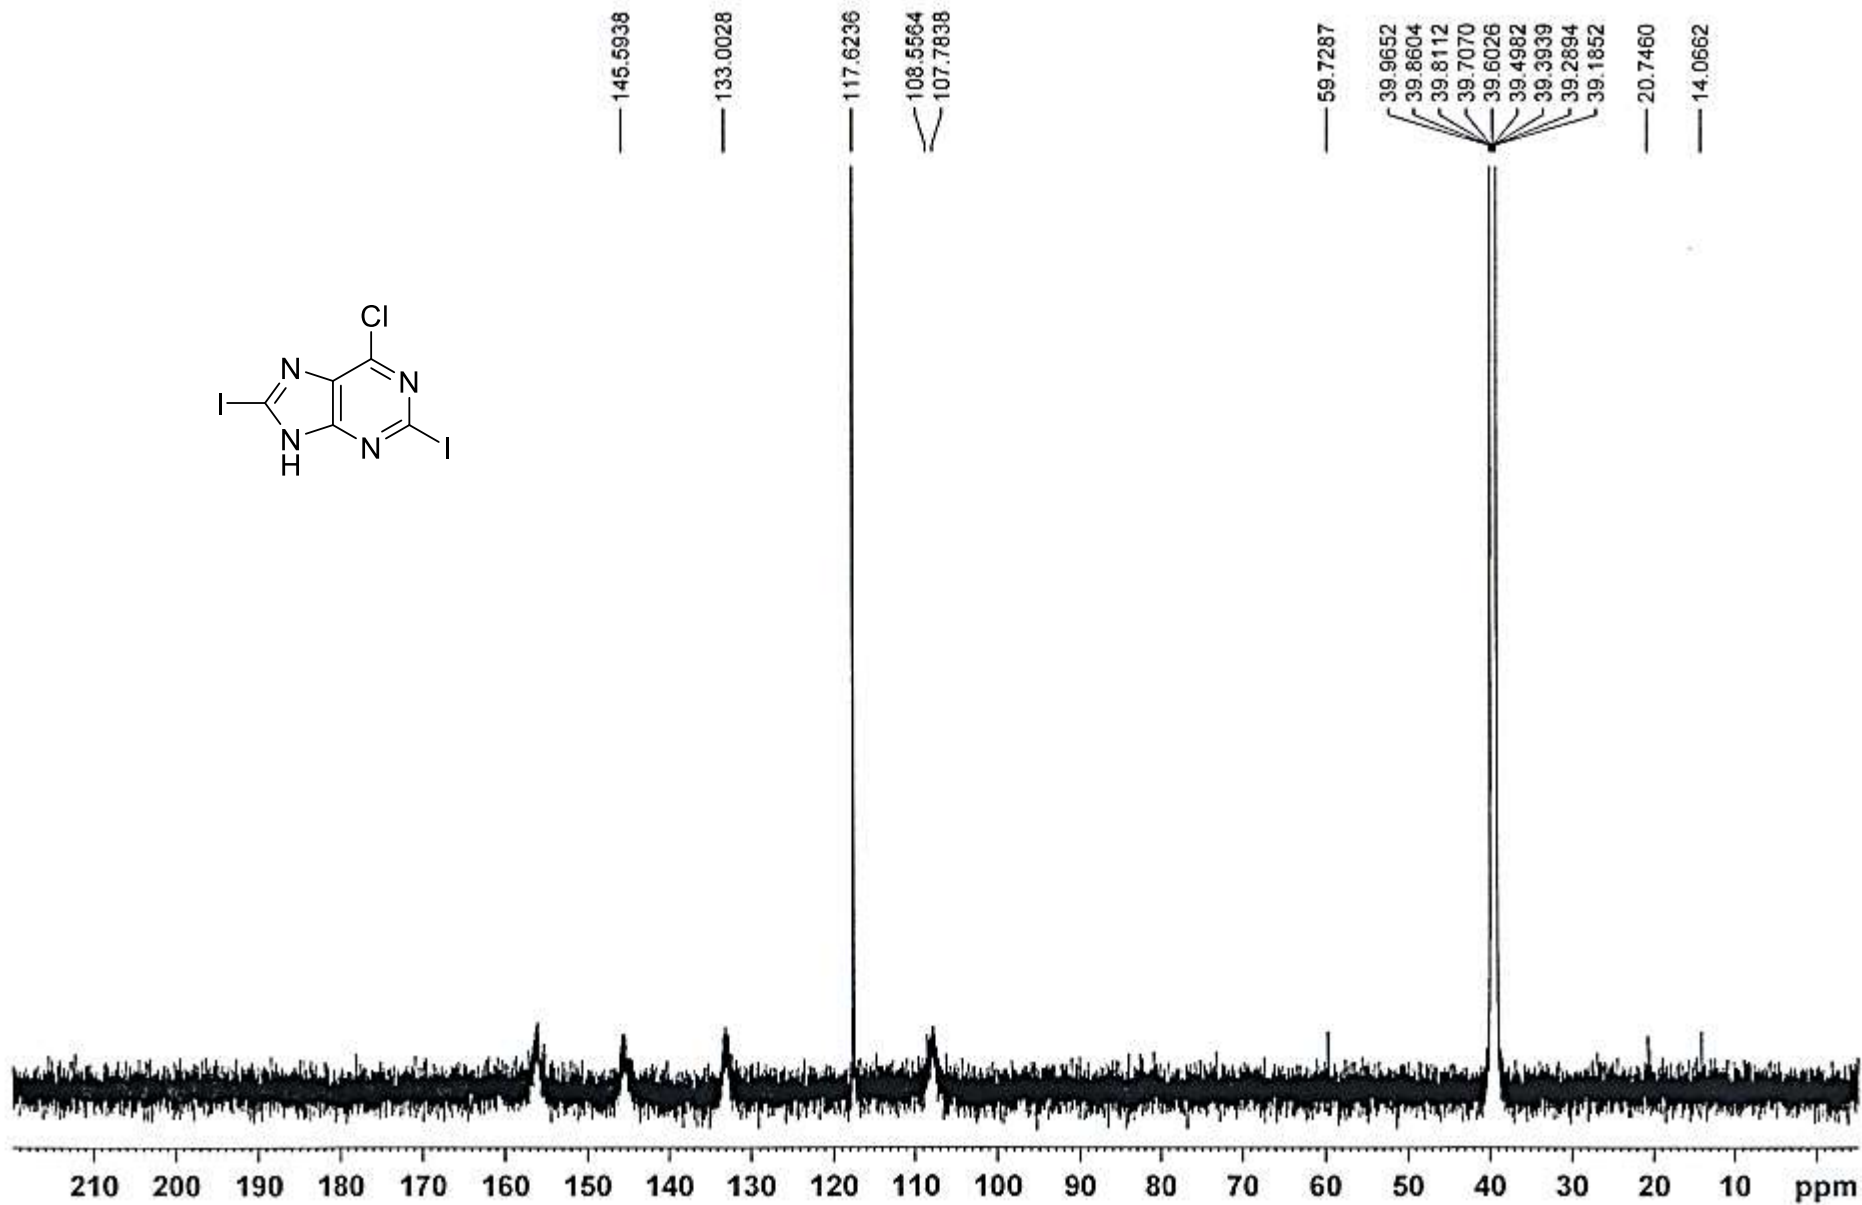

$^1\text{H}$  NMR (400 MHz,  $\text{CDCl}_3$ ) of **1b**

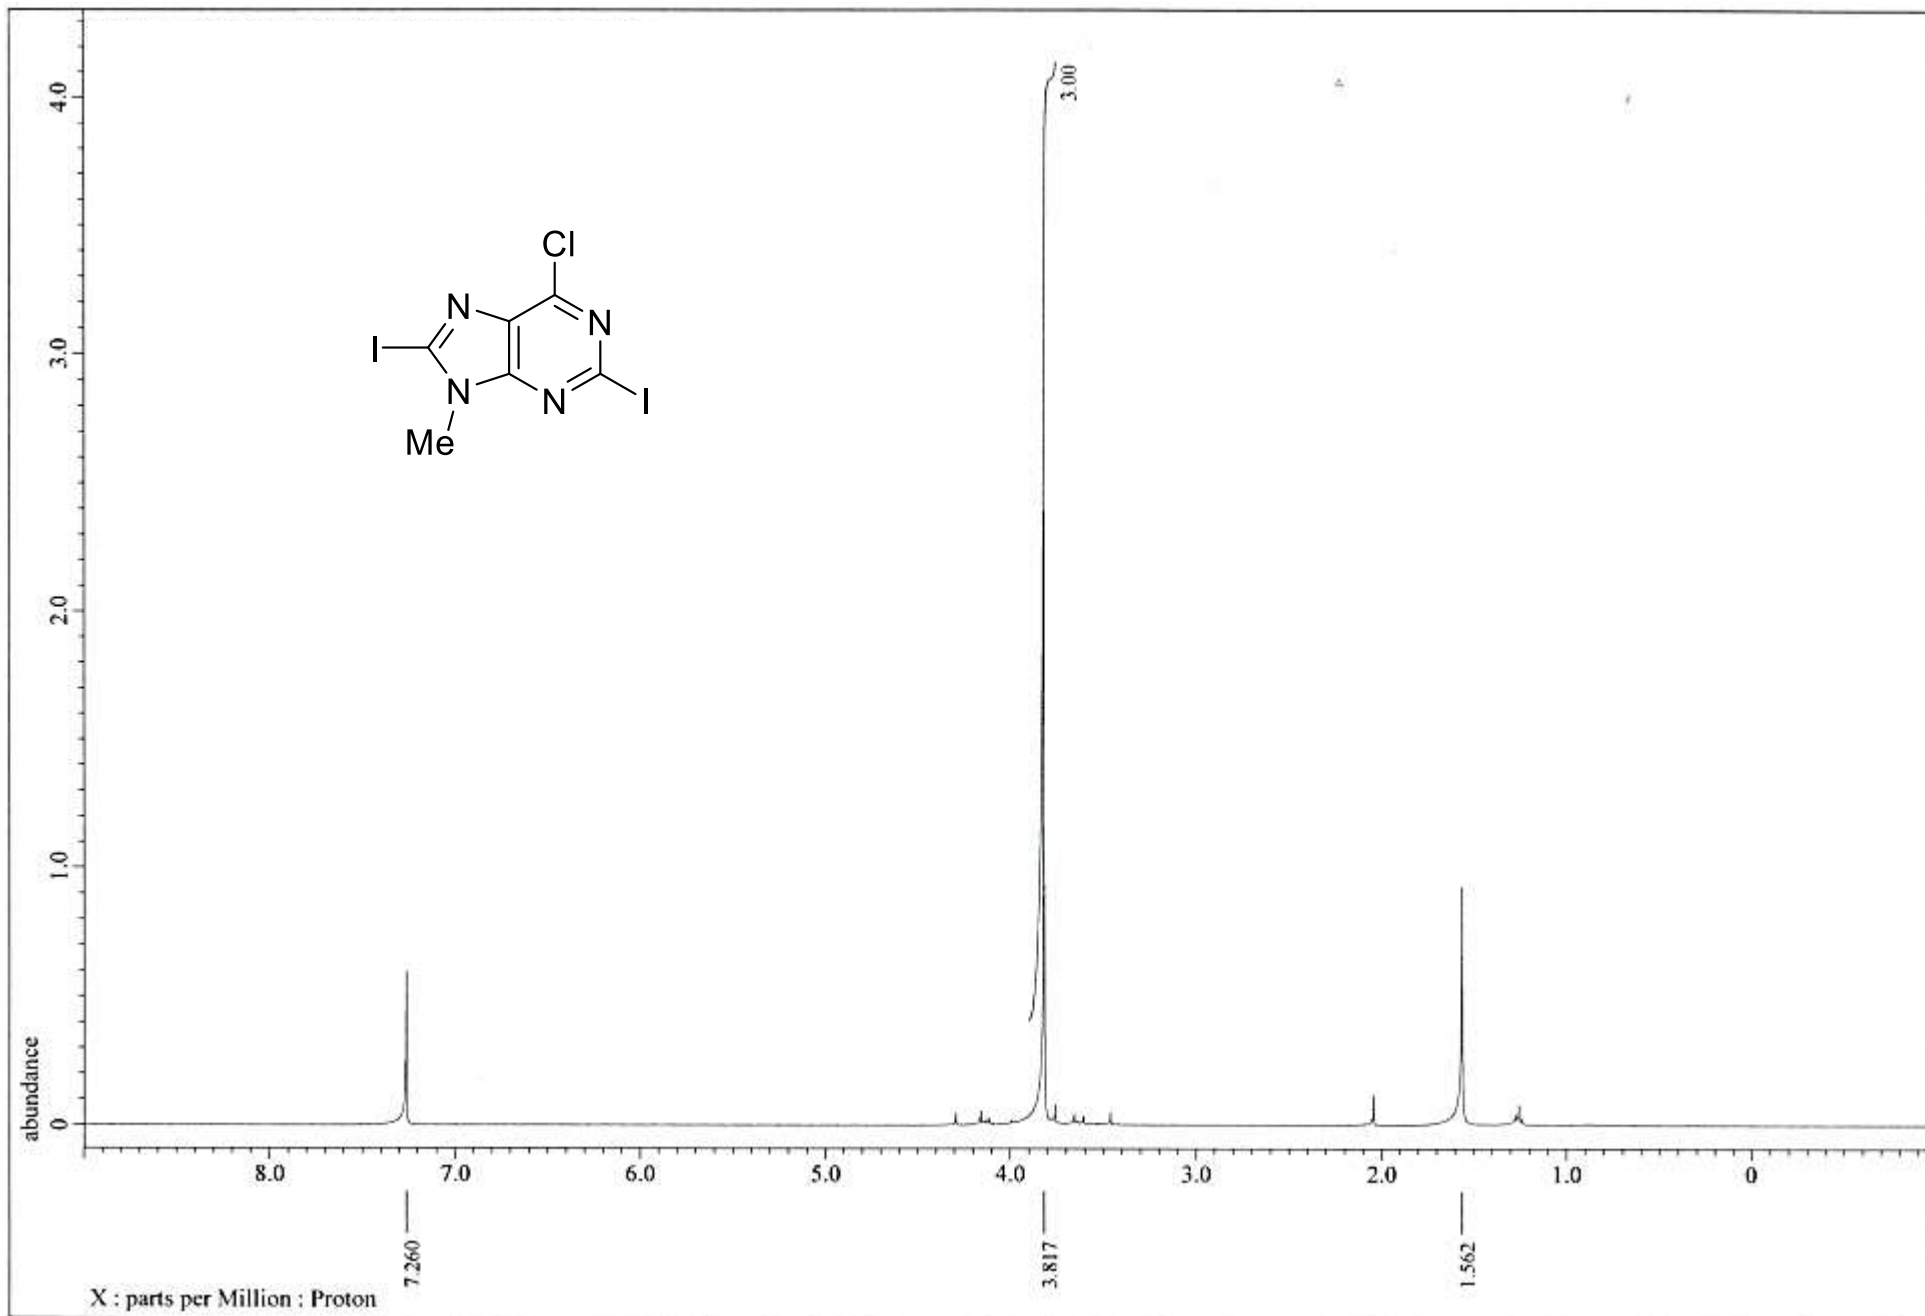

$^{13}\text{C}$  NMR (100 MHz,  $\text{CDCl}_3$ ) of **1b**

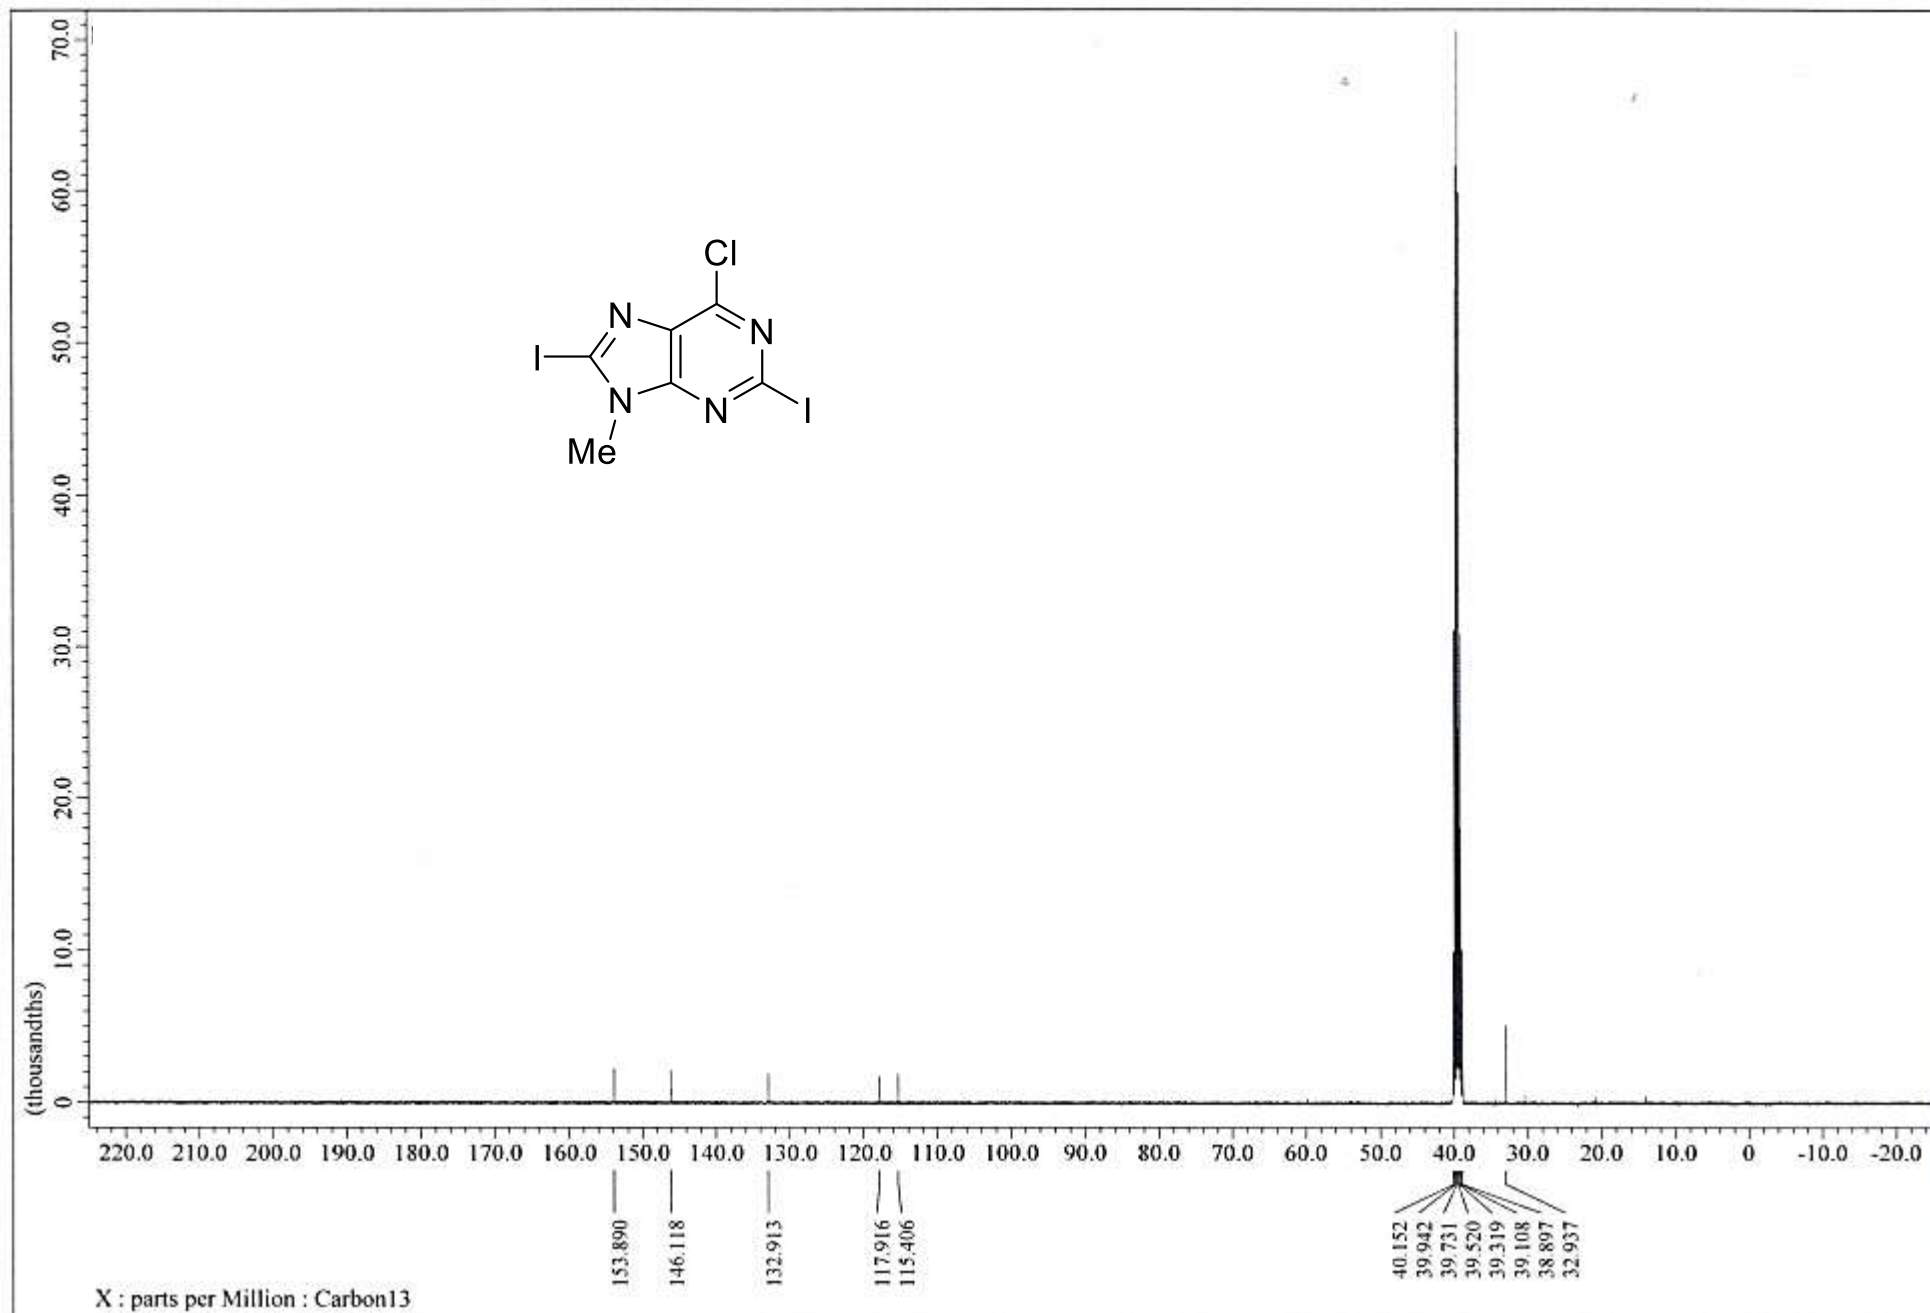

$^1\text{H}$  NMR (400 MHz,  $\text{CDCl}_3$ ) of **3b**

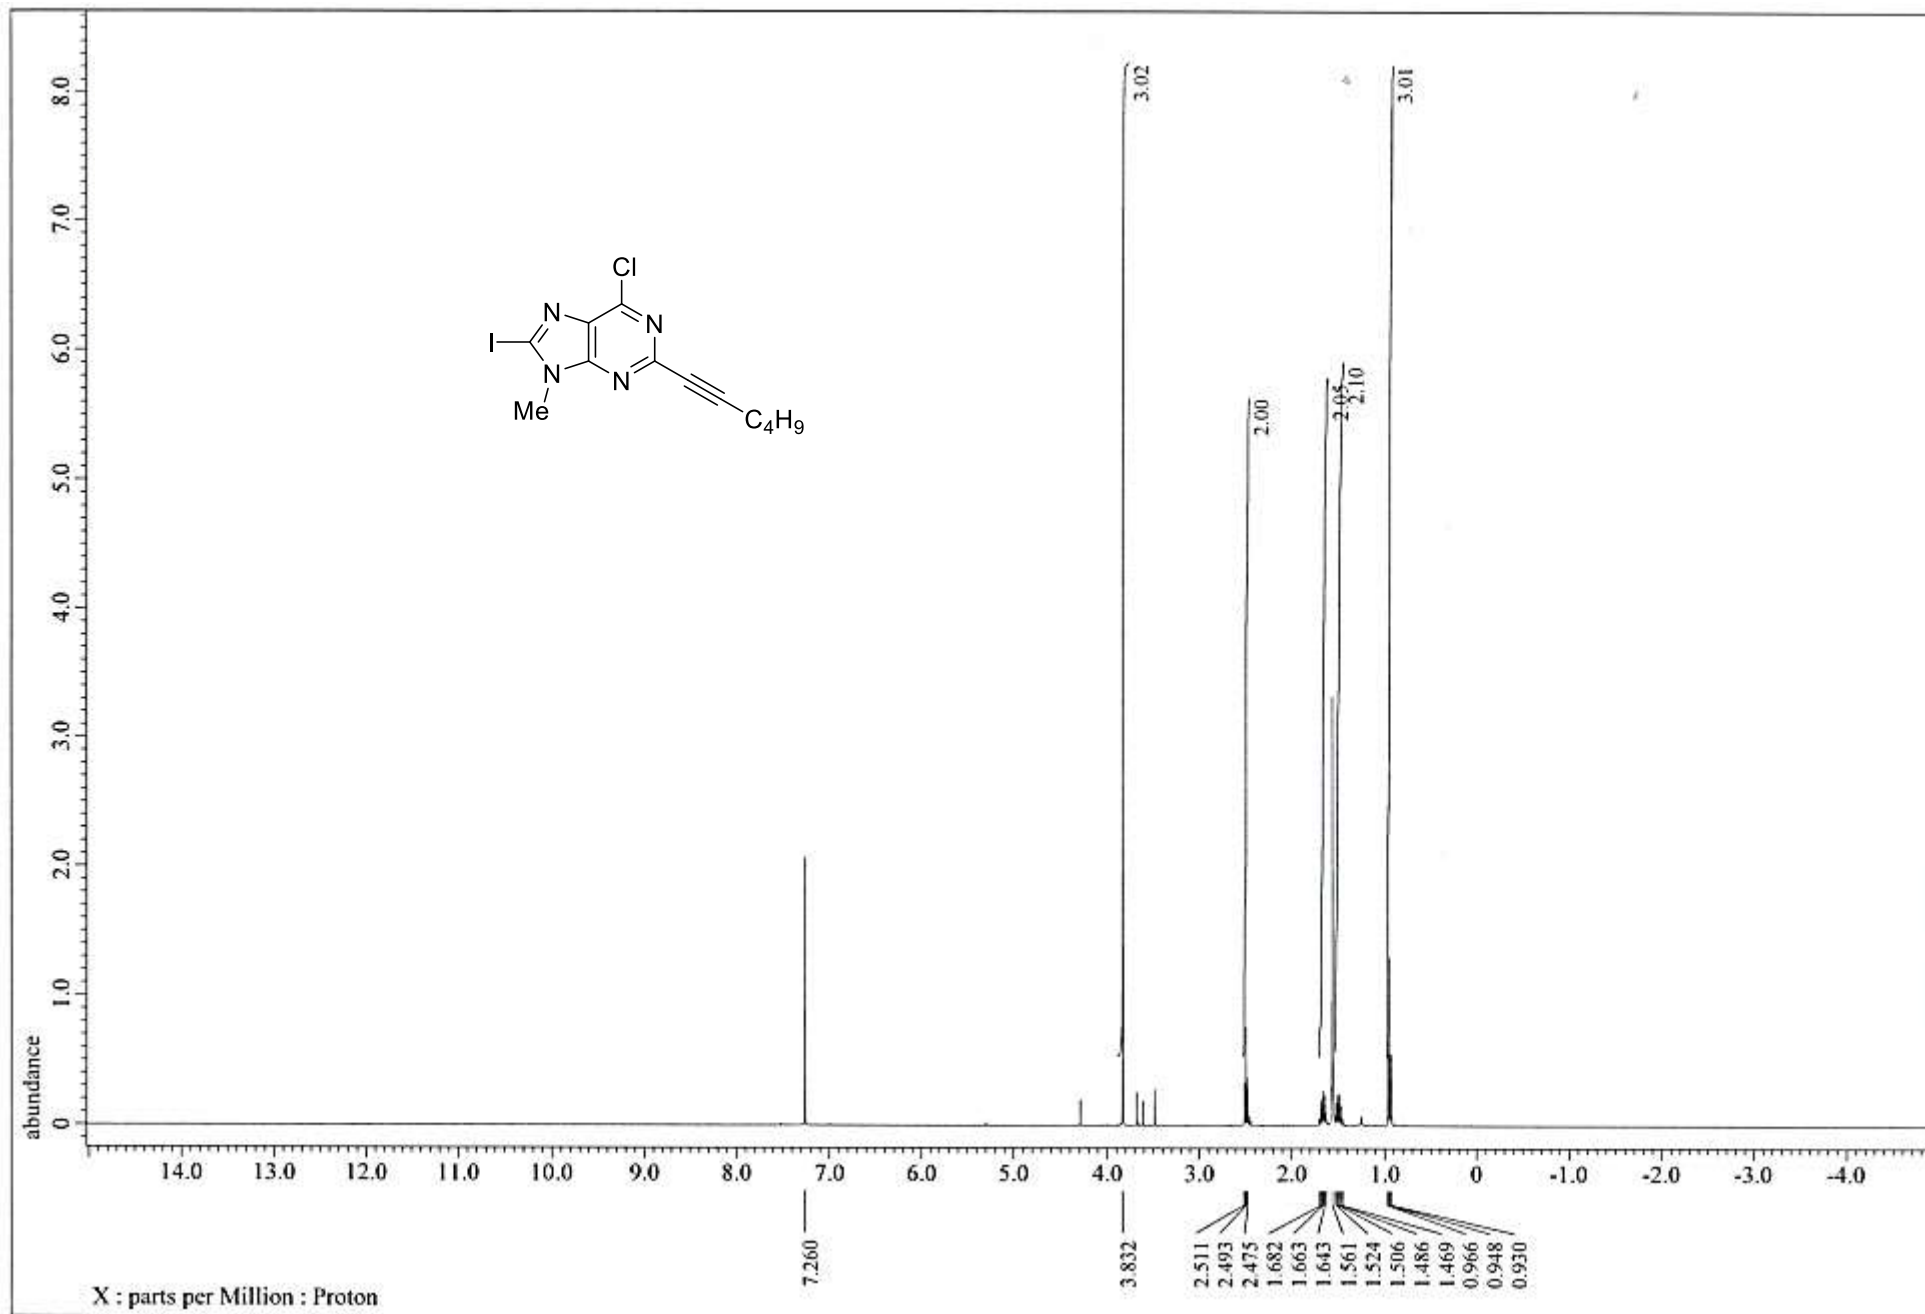



<sup>13</sup>C NMR (100 MHz, CDCl<sub>3</sub>) of **3b**

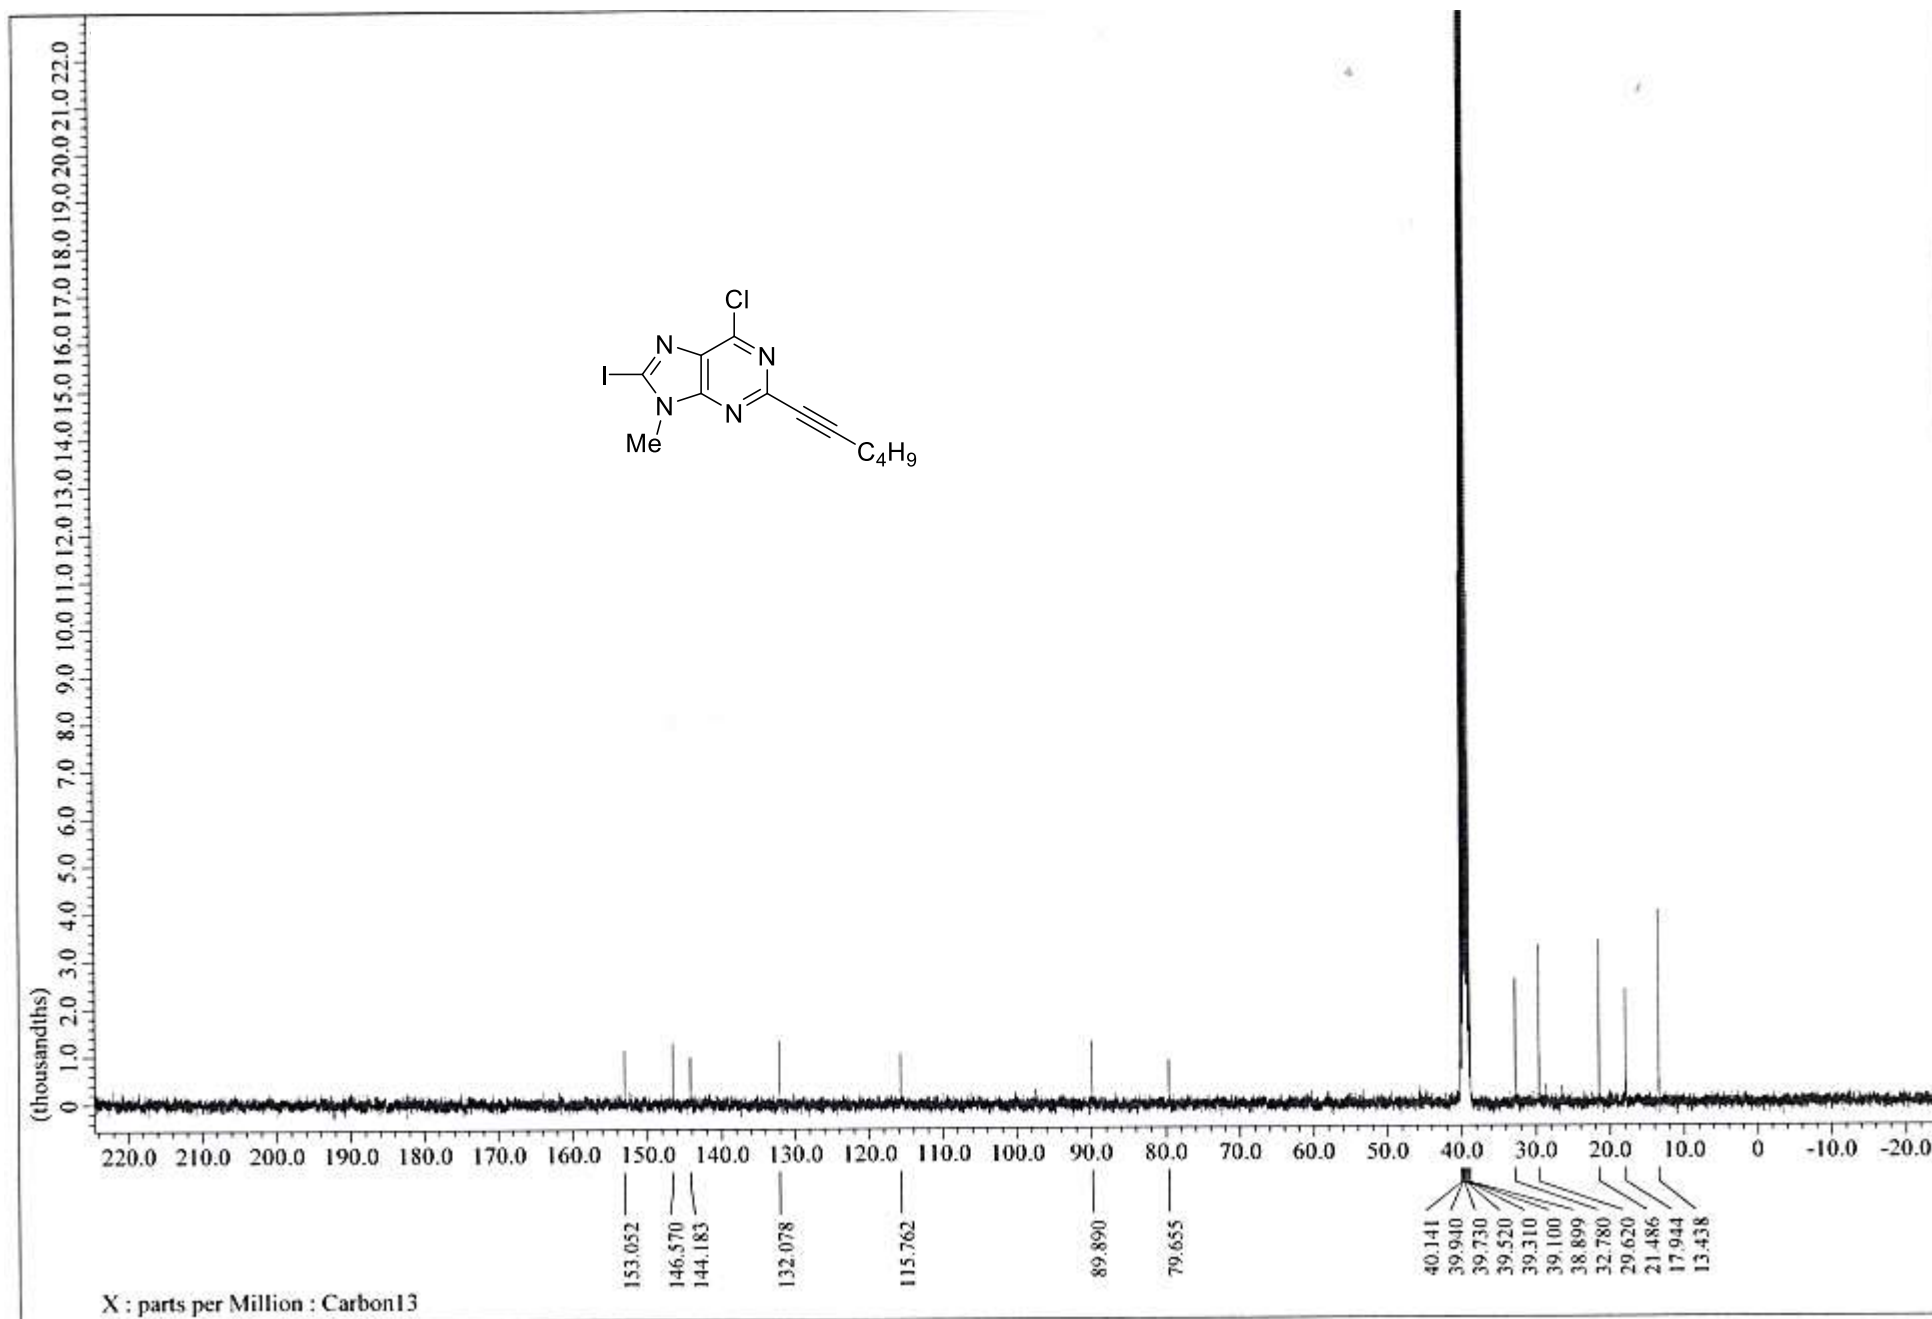

<sup>1</sup>H NMR (400 MHz, CDCl<sub>3</sub>) of **4b**

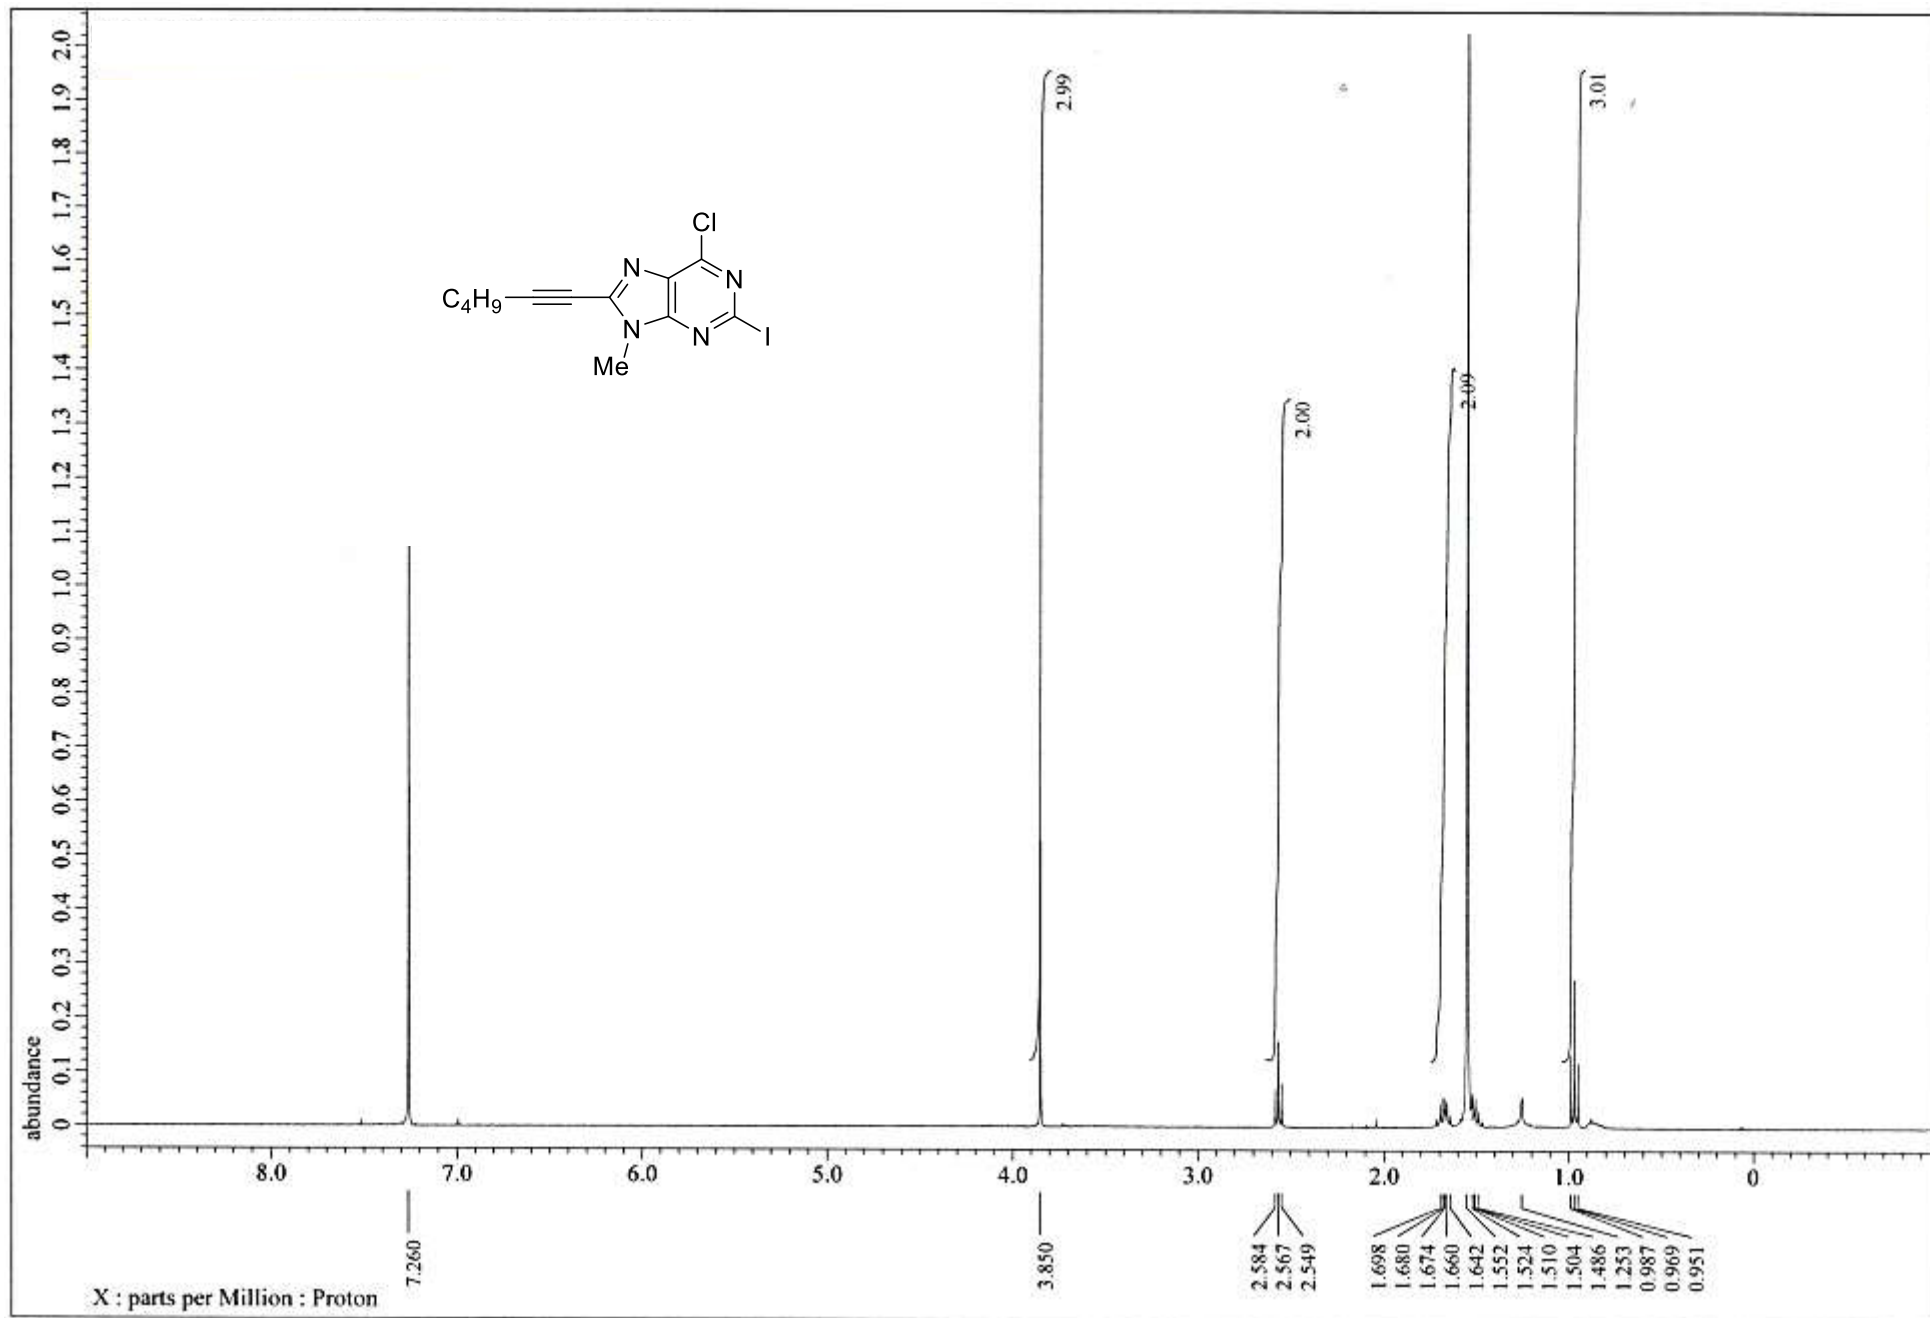

$^{13}\text{C}$  NMR (100 MHz,  $\text{CDCl}_3$ ) of **4b**

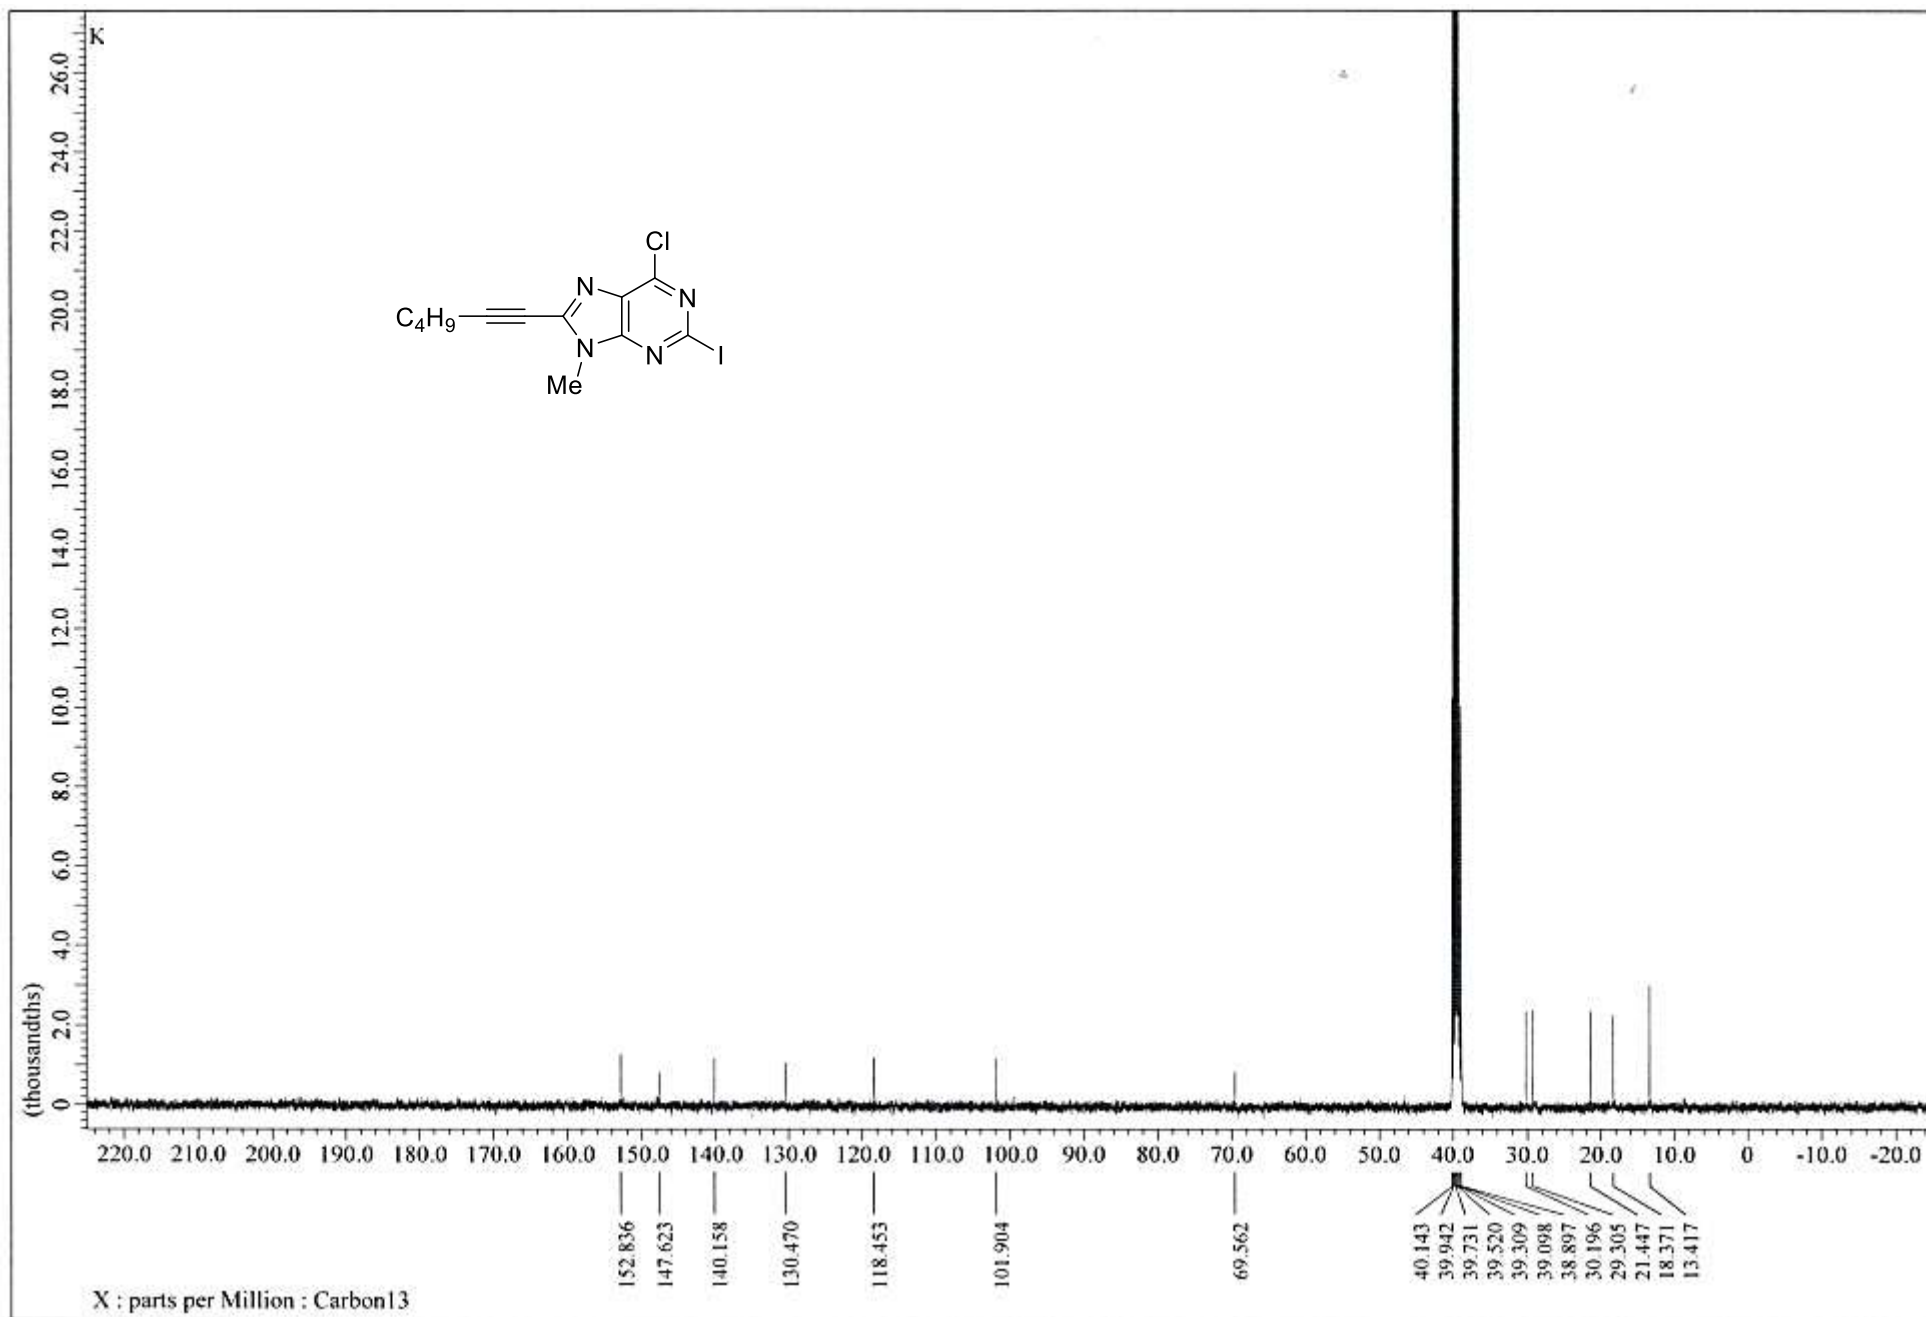

$^1\text{H}$  NMR (400 MHz,  $\text{CDCl}_3$ ) of **5b**

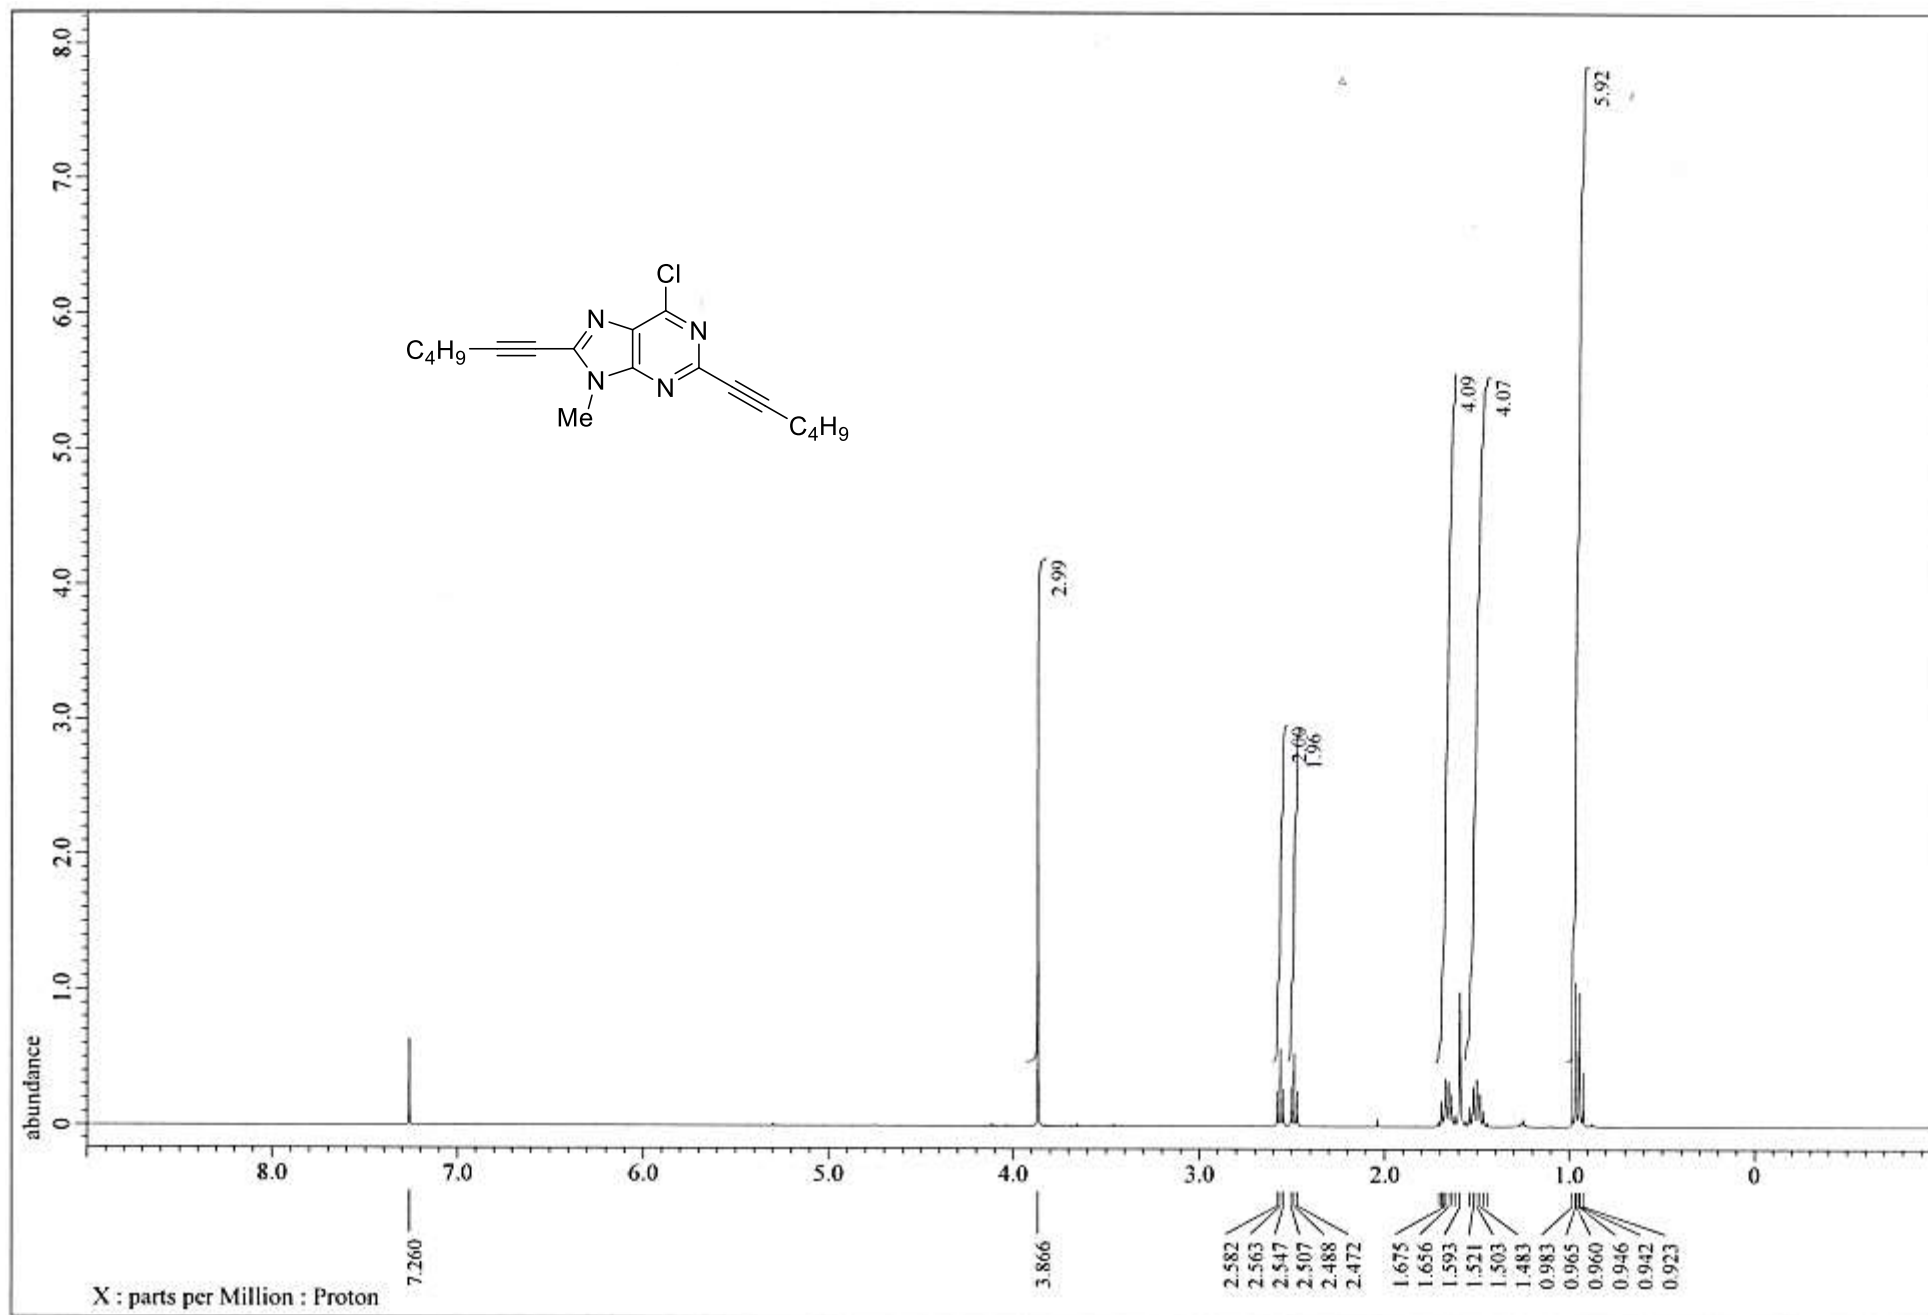

<sup>13</sup>C NMR (100 MHz, CDCl<sub>3</sub>) of **5b**

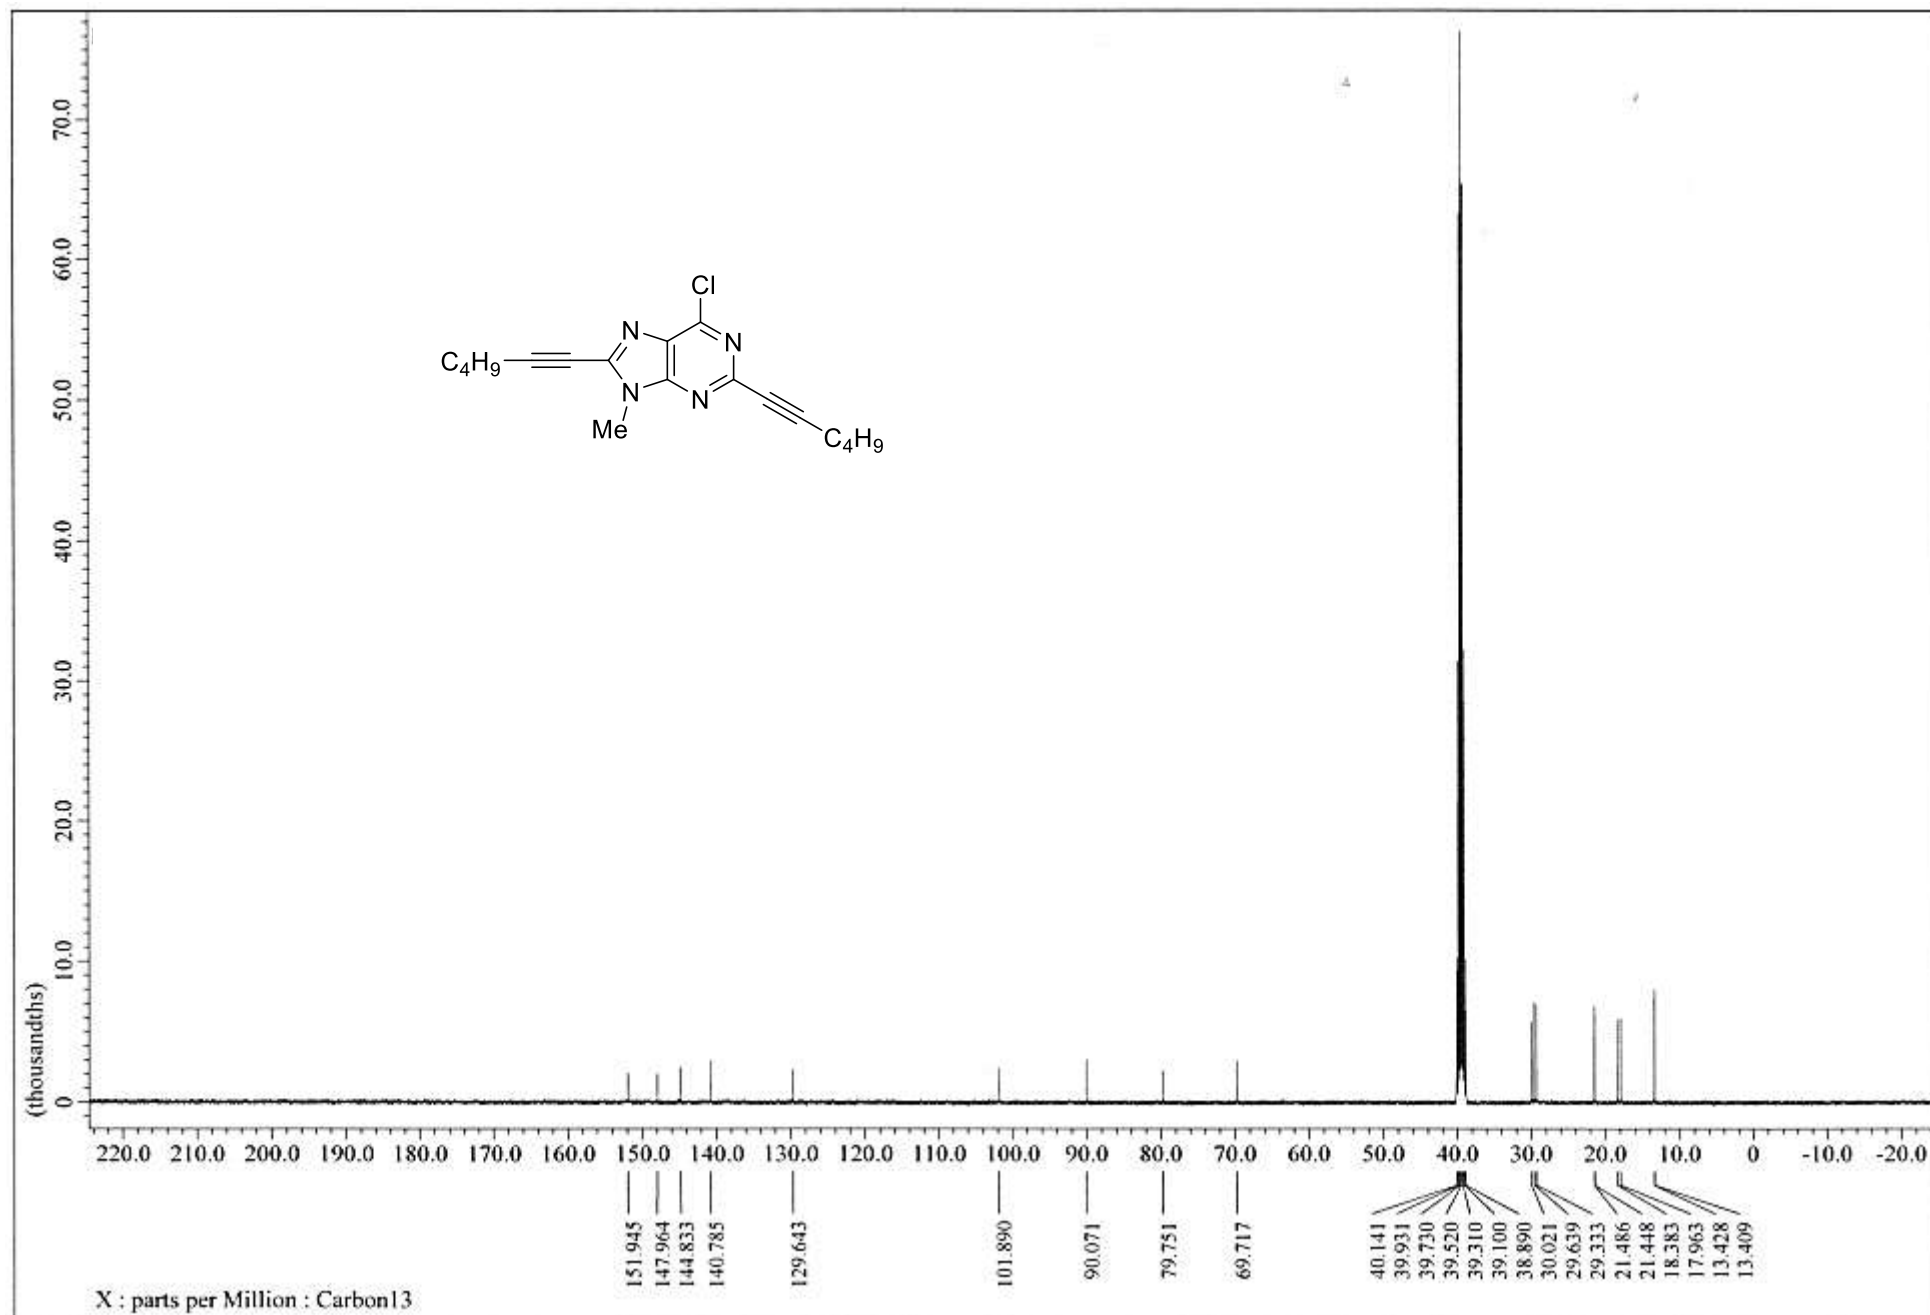

$^1\text{H}$  NMR (400 MHz,  $\text{CDCl}_3$ ) of **1c**

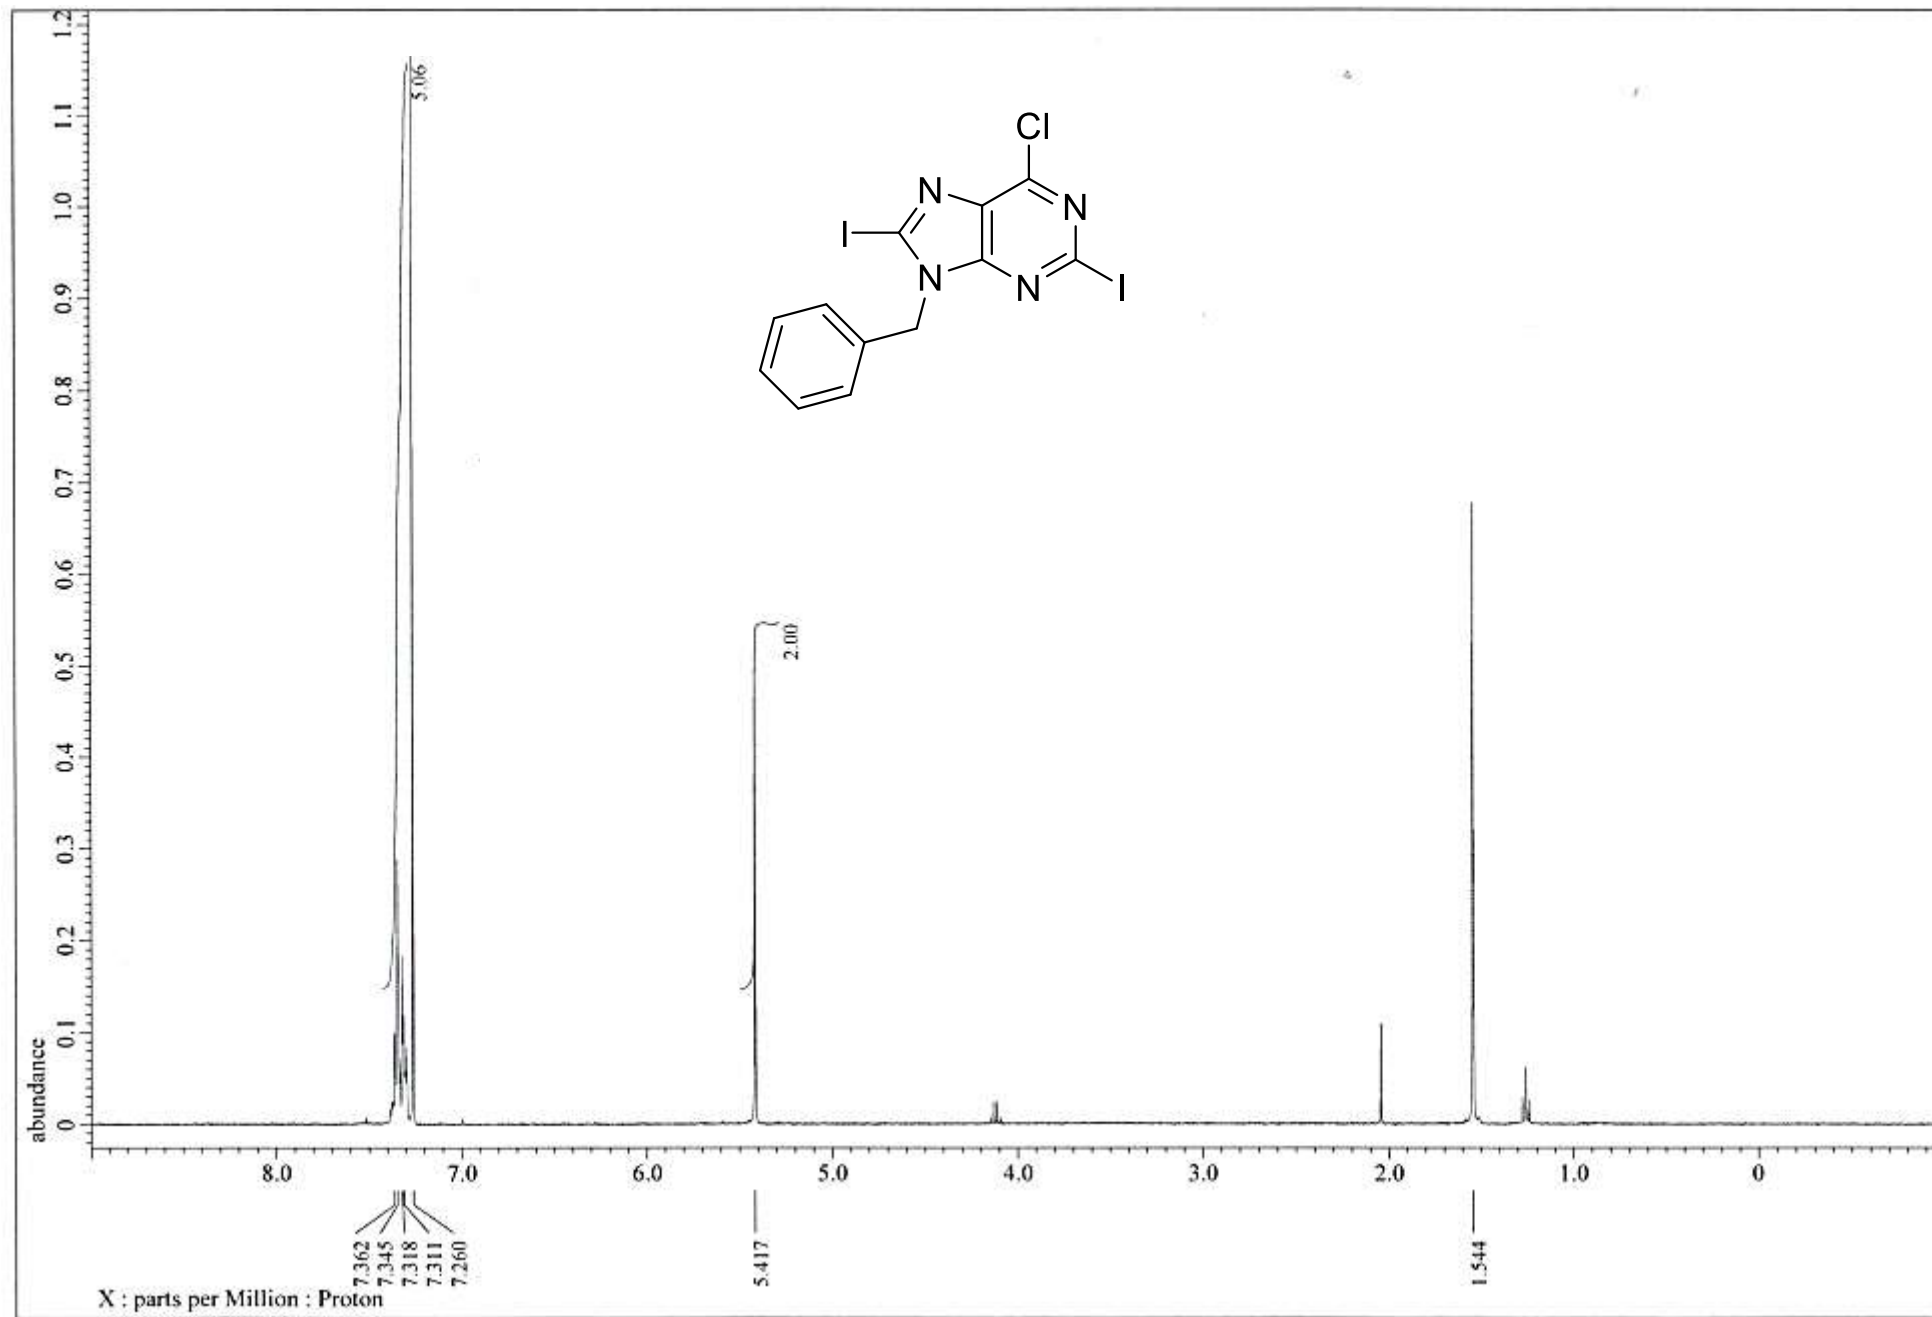

$^{13}\text{C}$  NMR (100 MHz,  $\text{CDCl}_3$ ) of **1c**

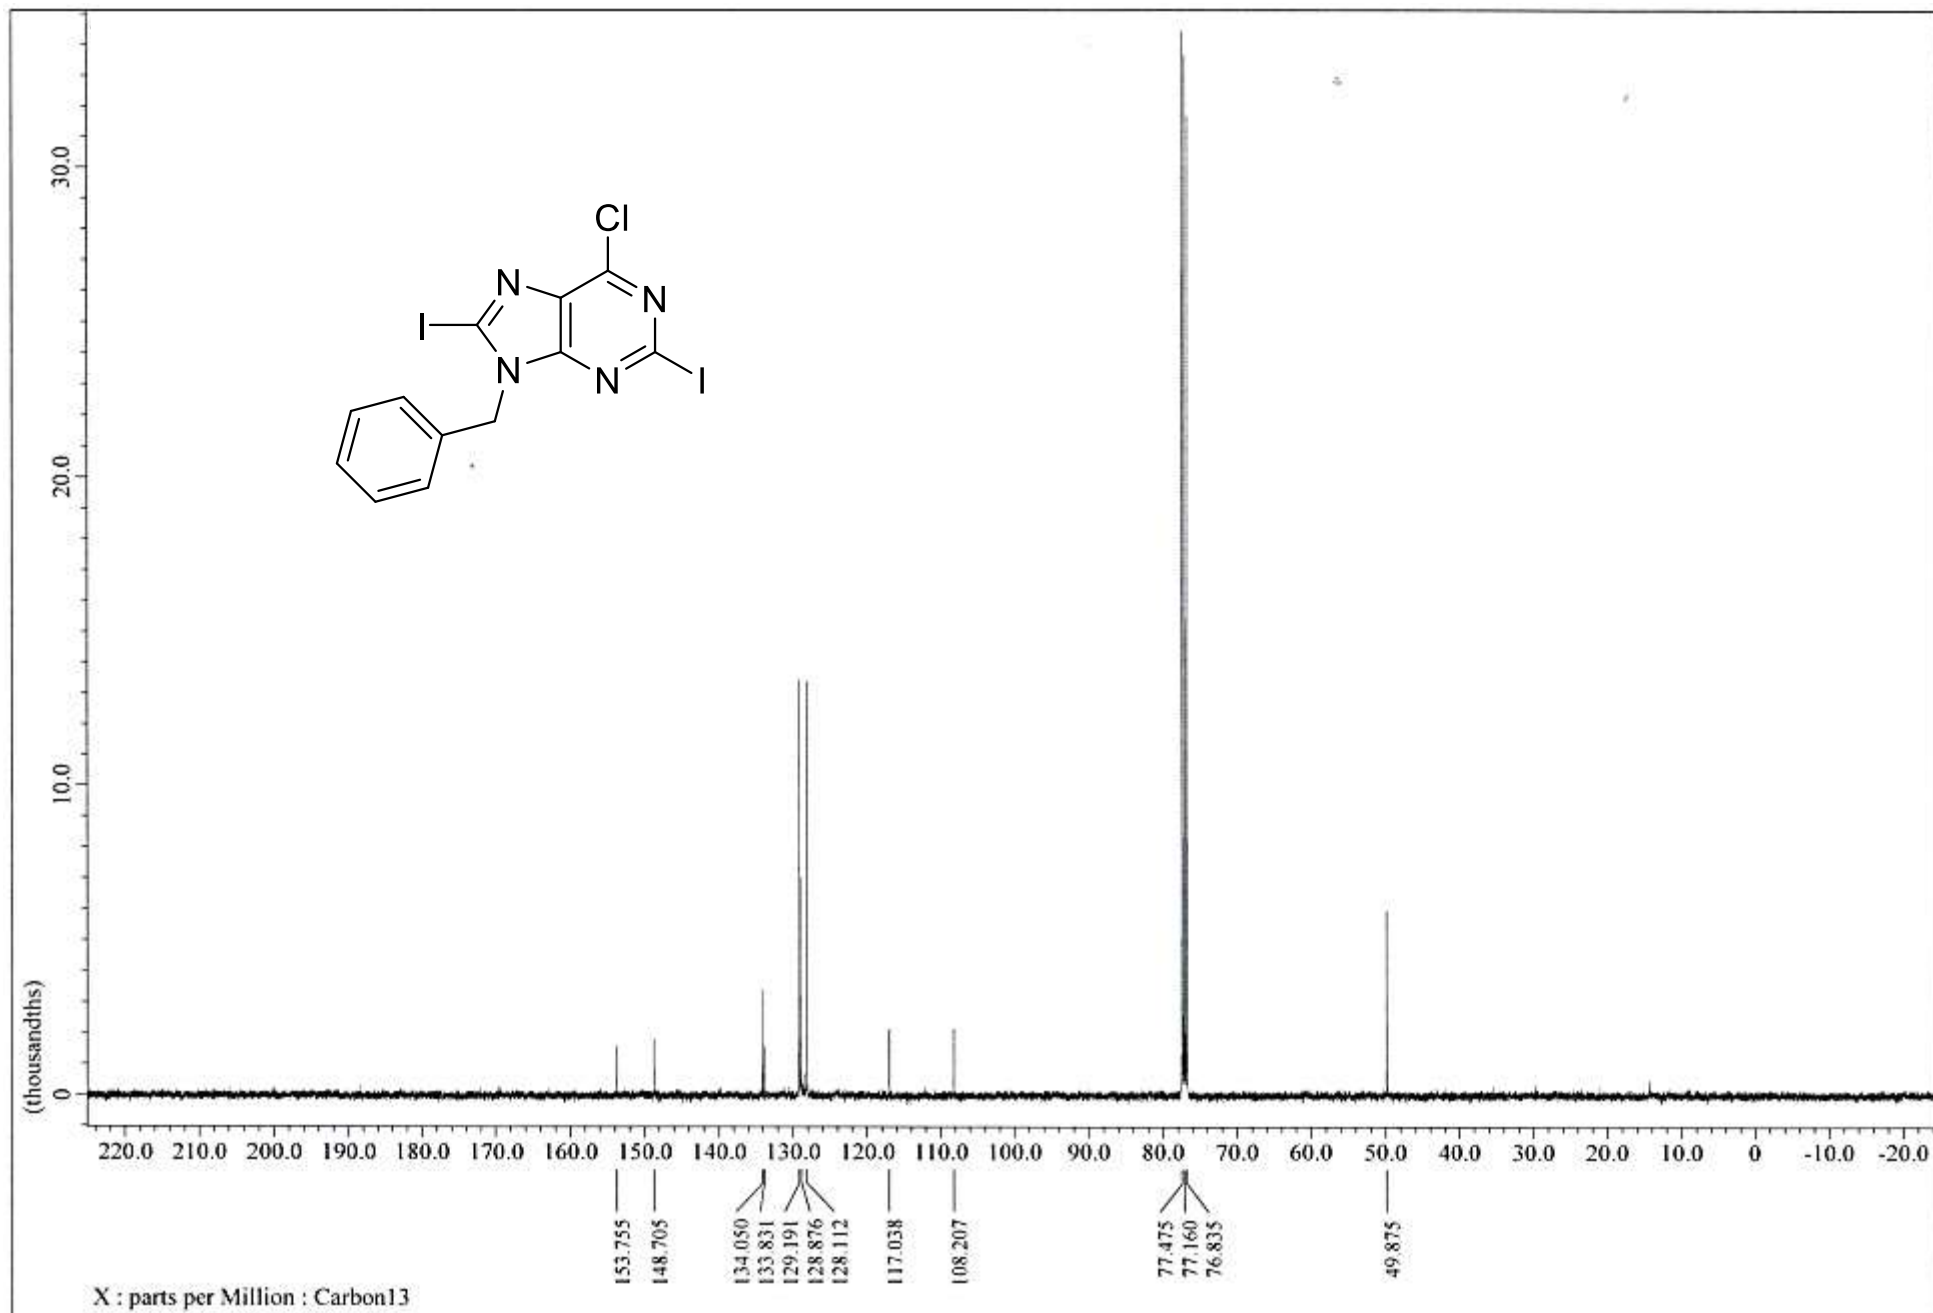

$^1\text{H}$  NMR (400 MHz,  $\text{CDCl}_3$ ) of **3c**

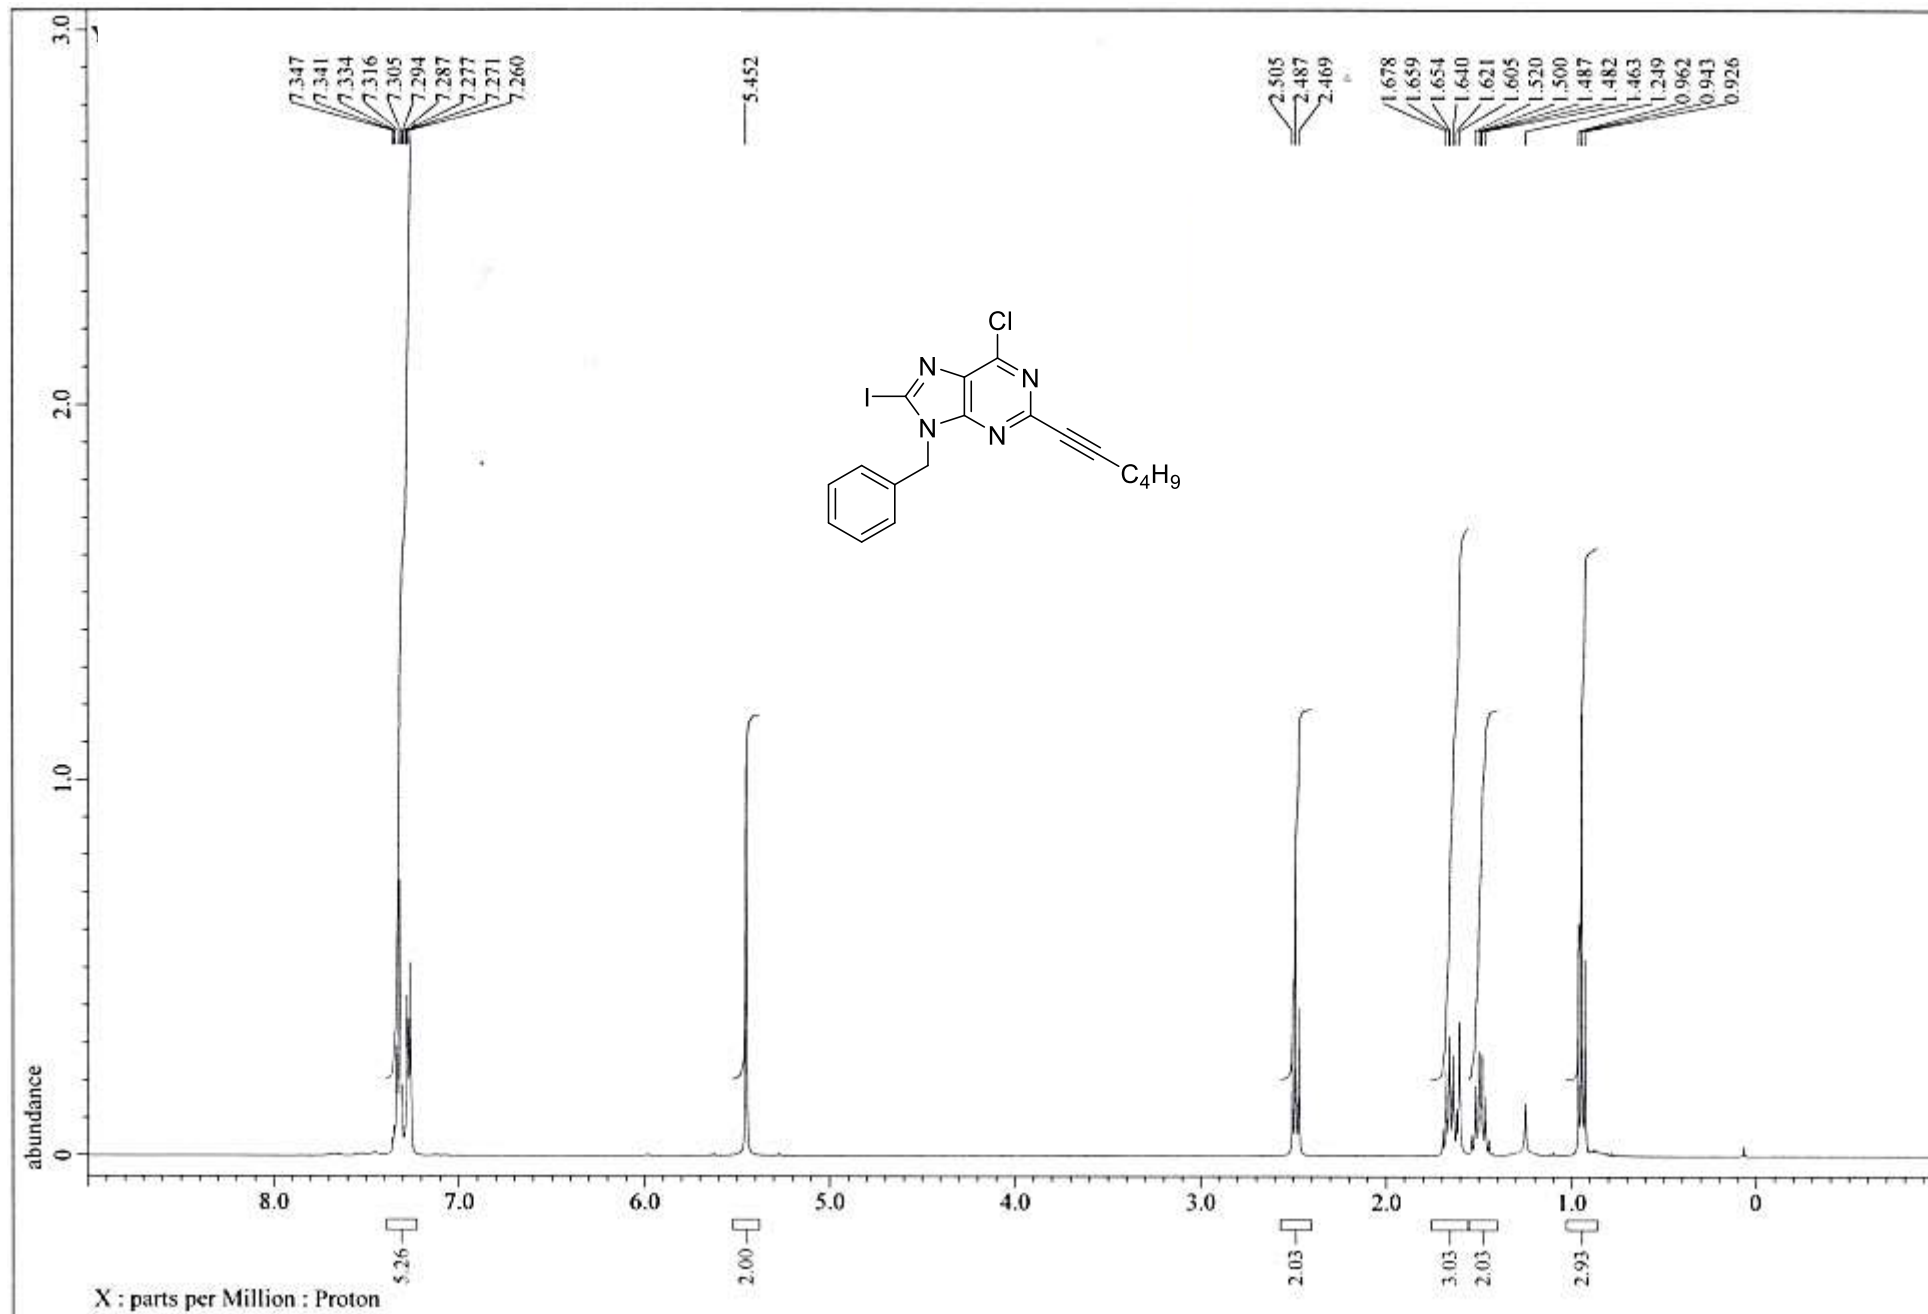



$^{13}\text{C}$  NMR (100 MHz,  $\text{CDCl}_3$ ) of **3c**

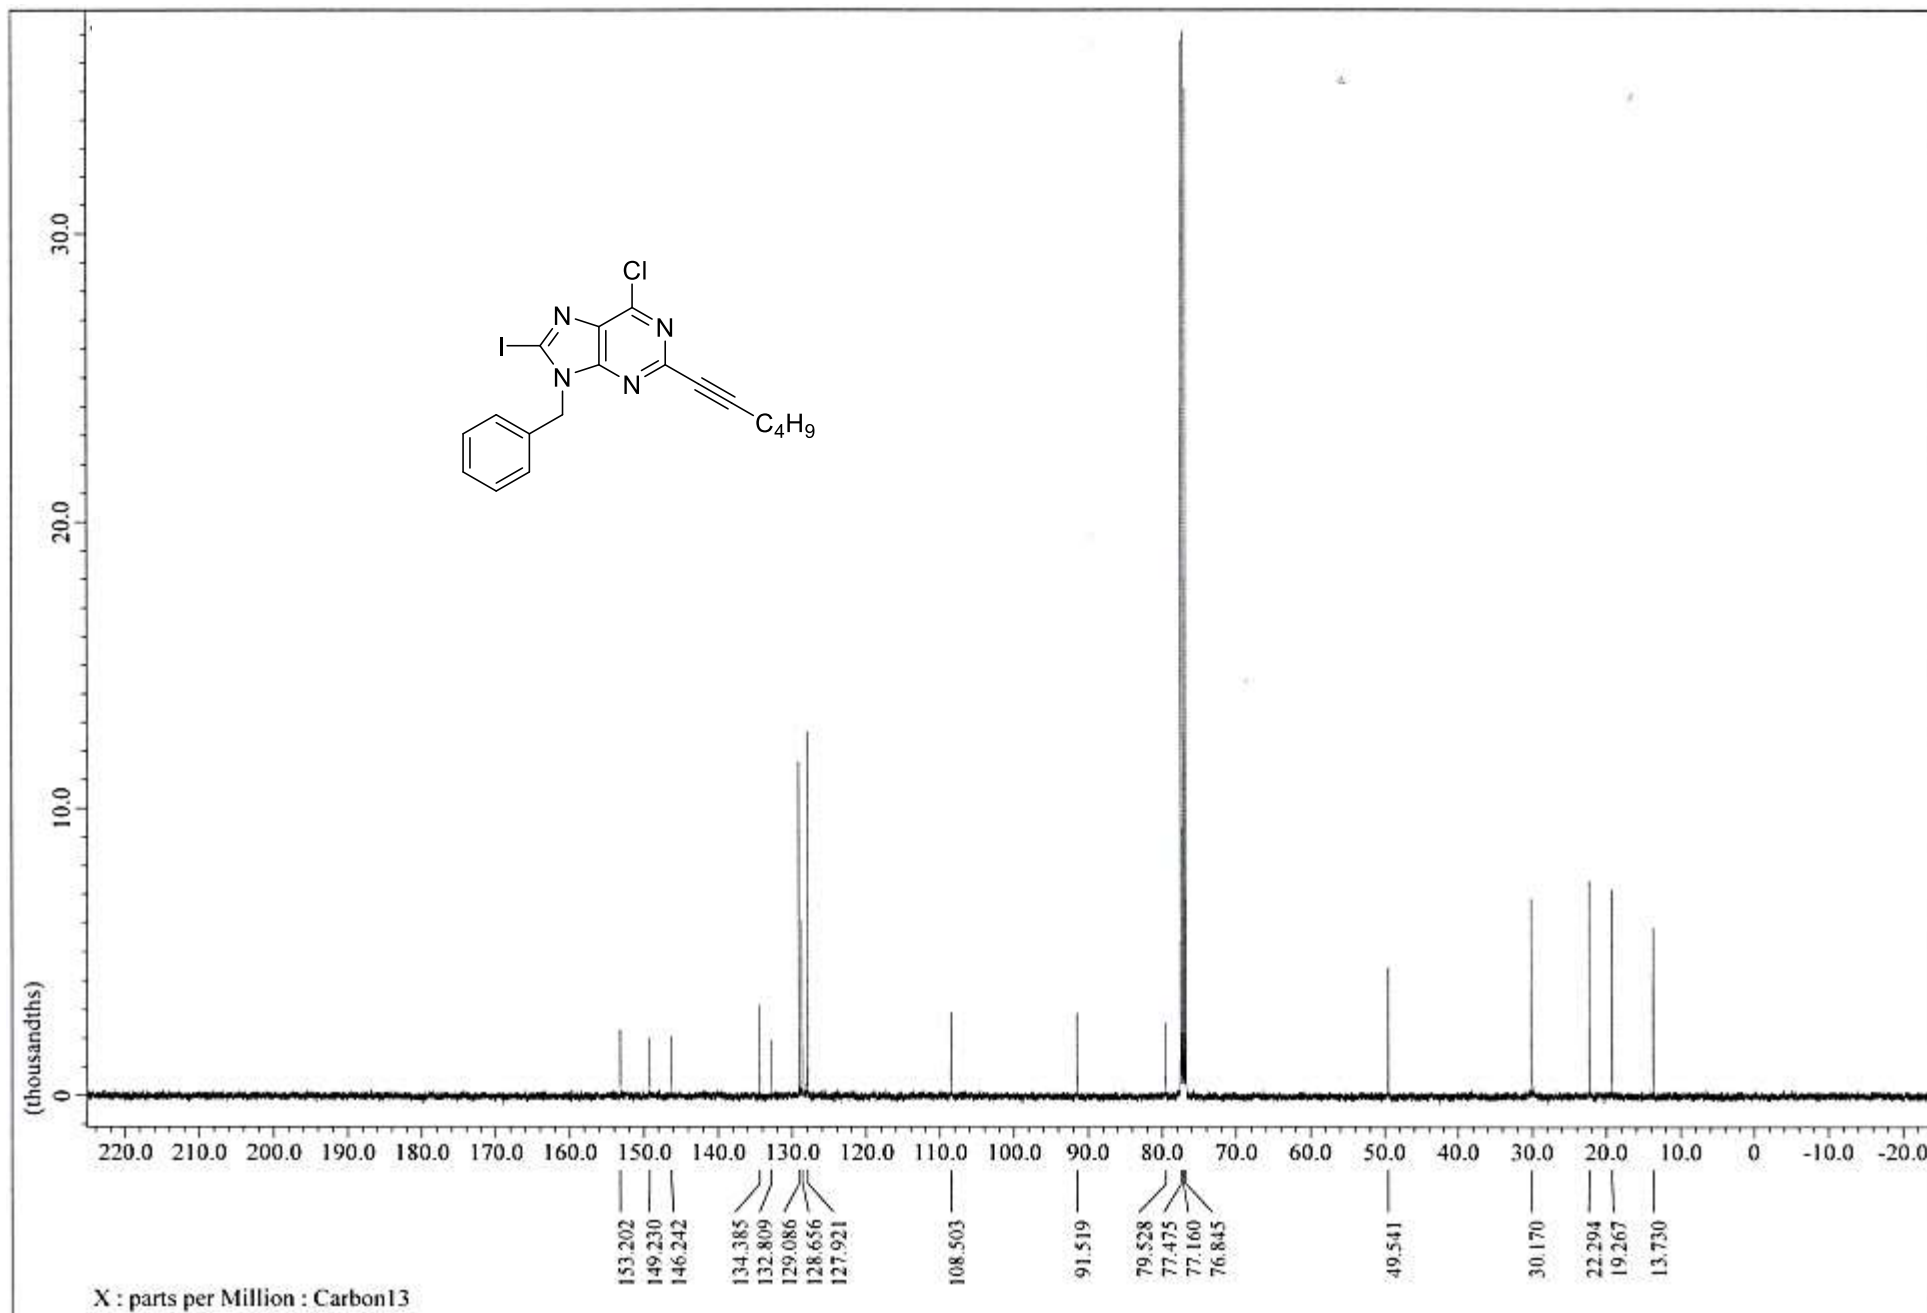

$^1\text{H}$  NMR (400 MHz,  $\text{CDCl}_3$ ) of **4c**

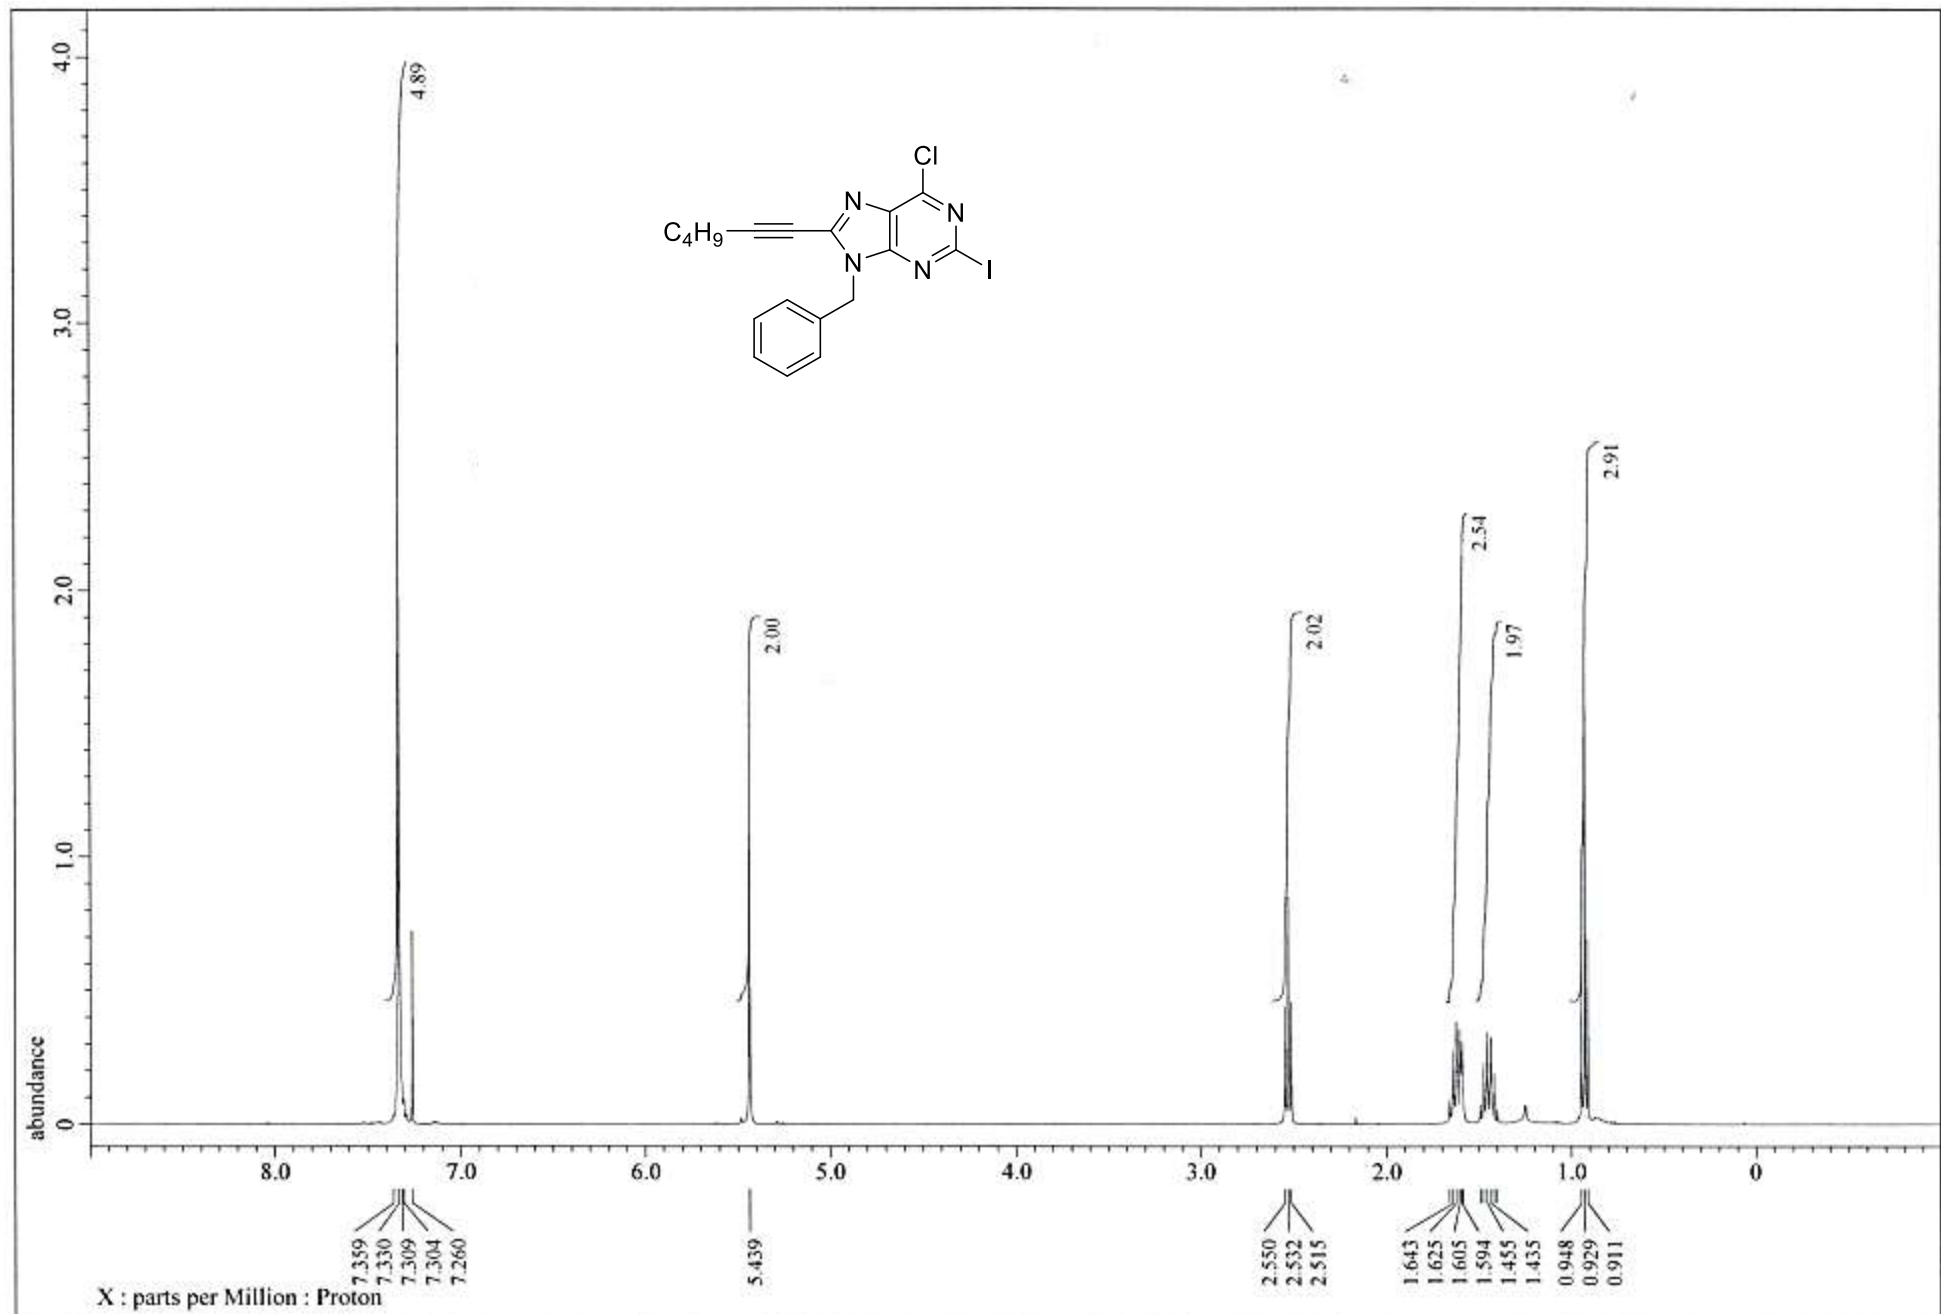

$^{13}\text{C}$  NMR (100 MHz,  $\text{CDCl}_3$ ) of **4c**

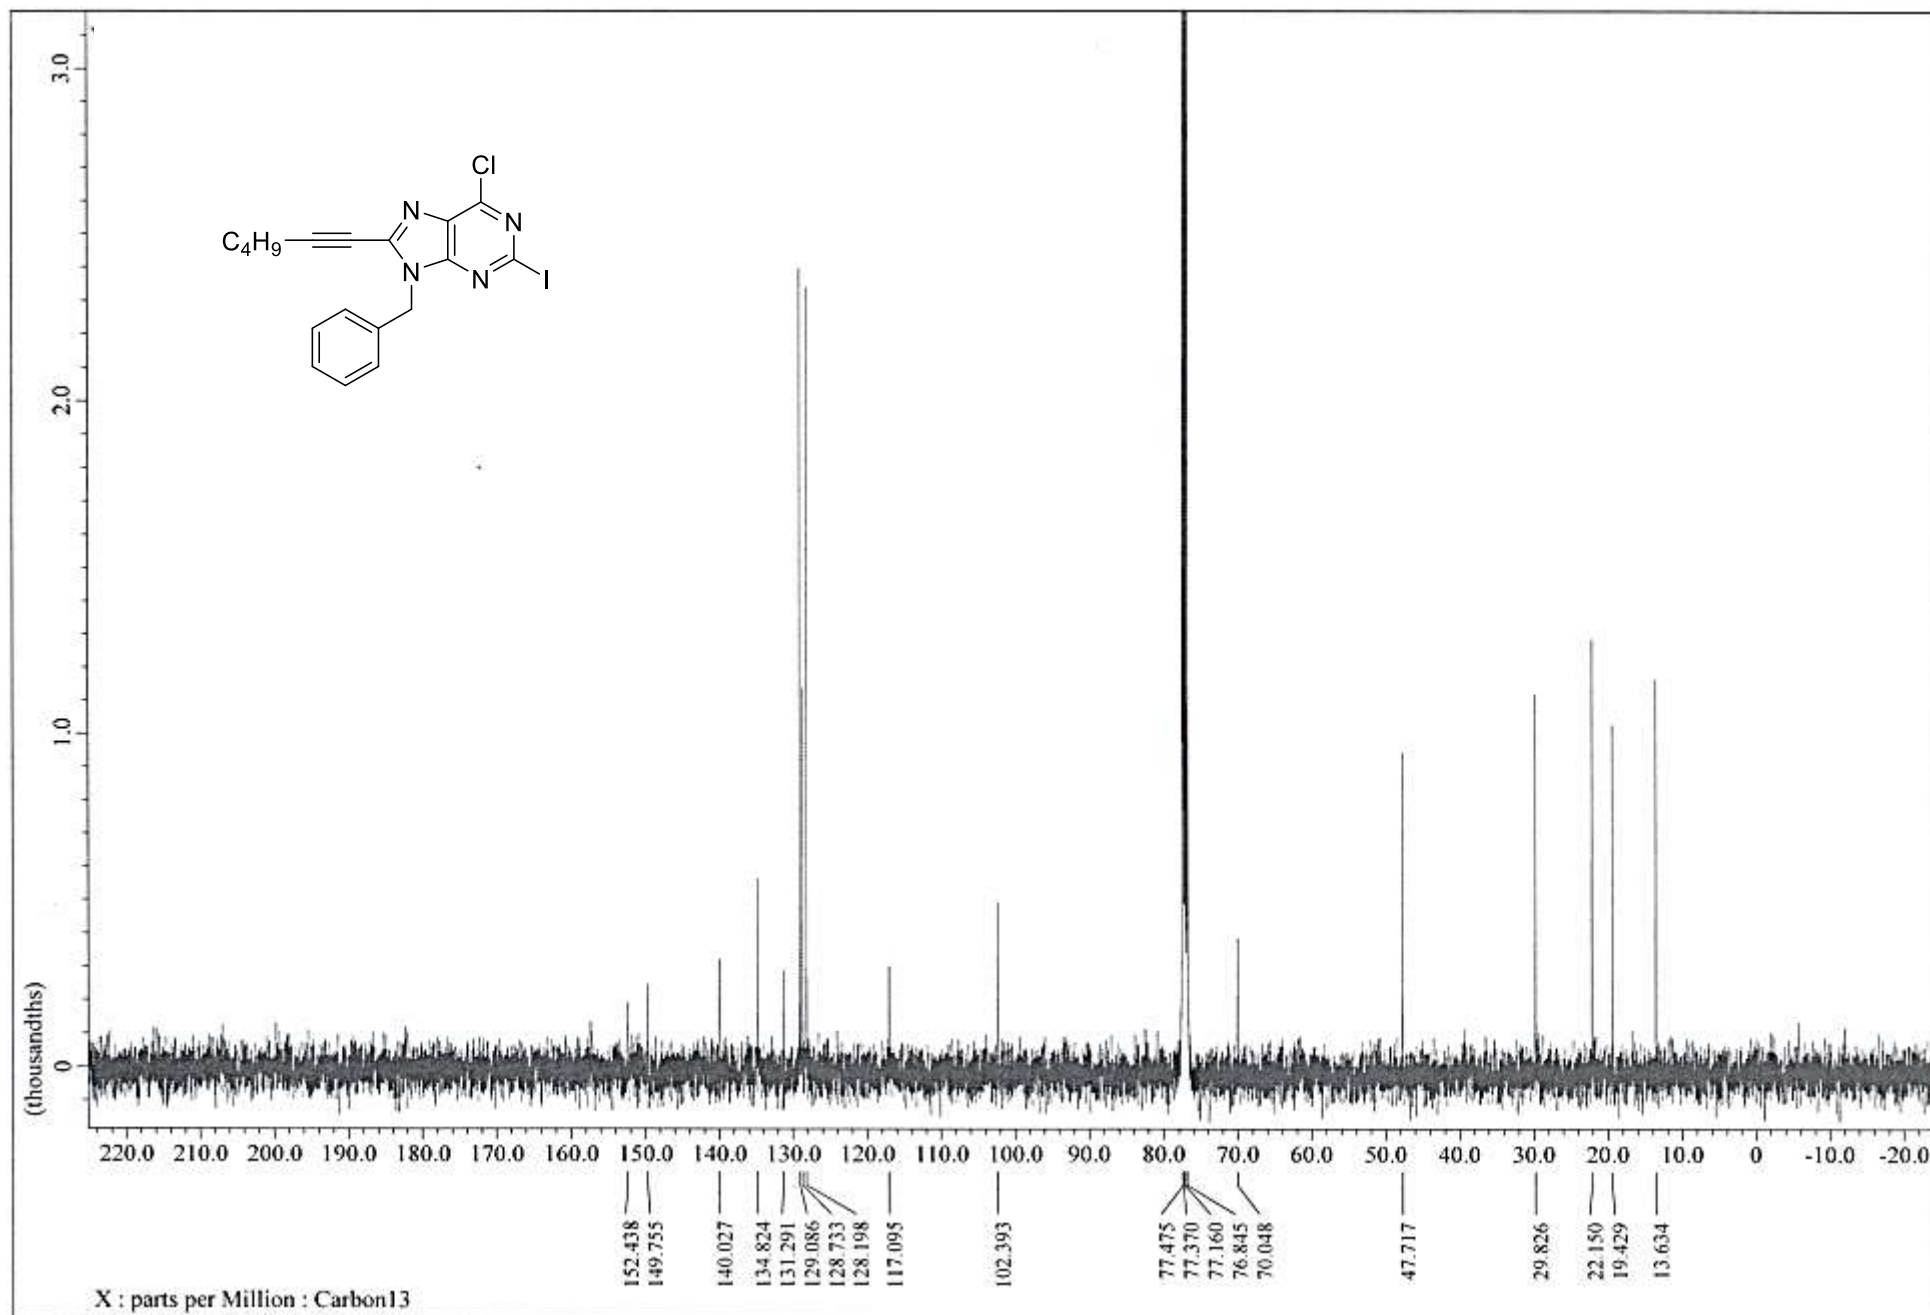

$^1\text{H}$  NMR (400 MHz,  $\text{CDCl}_3$ ) of **5c**

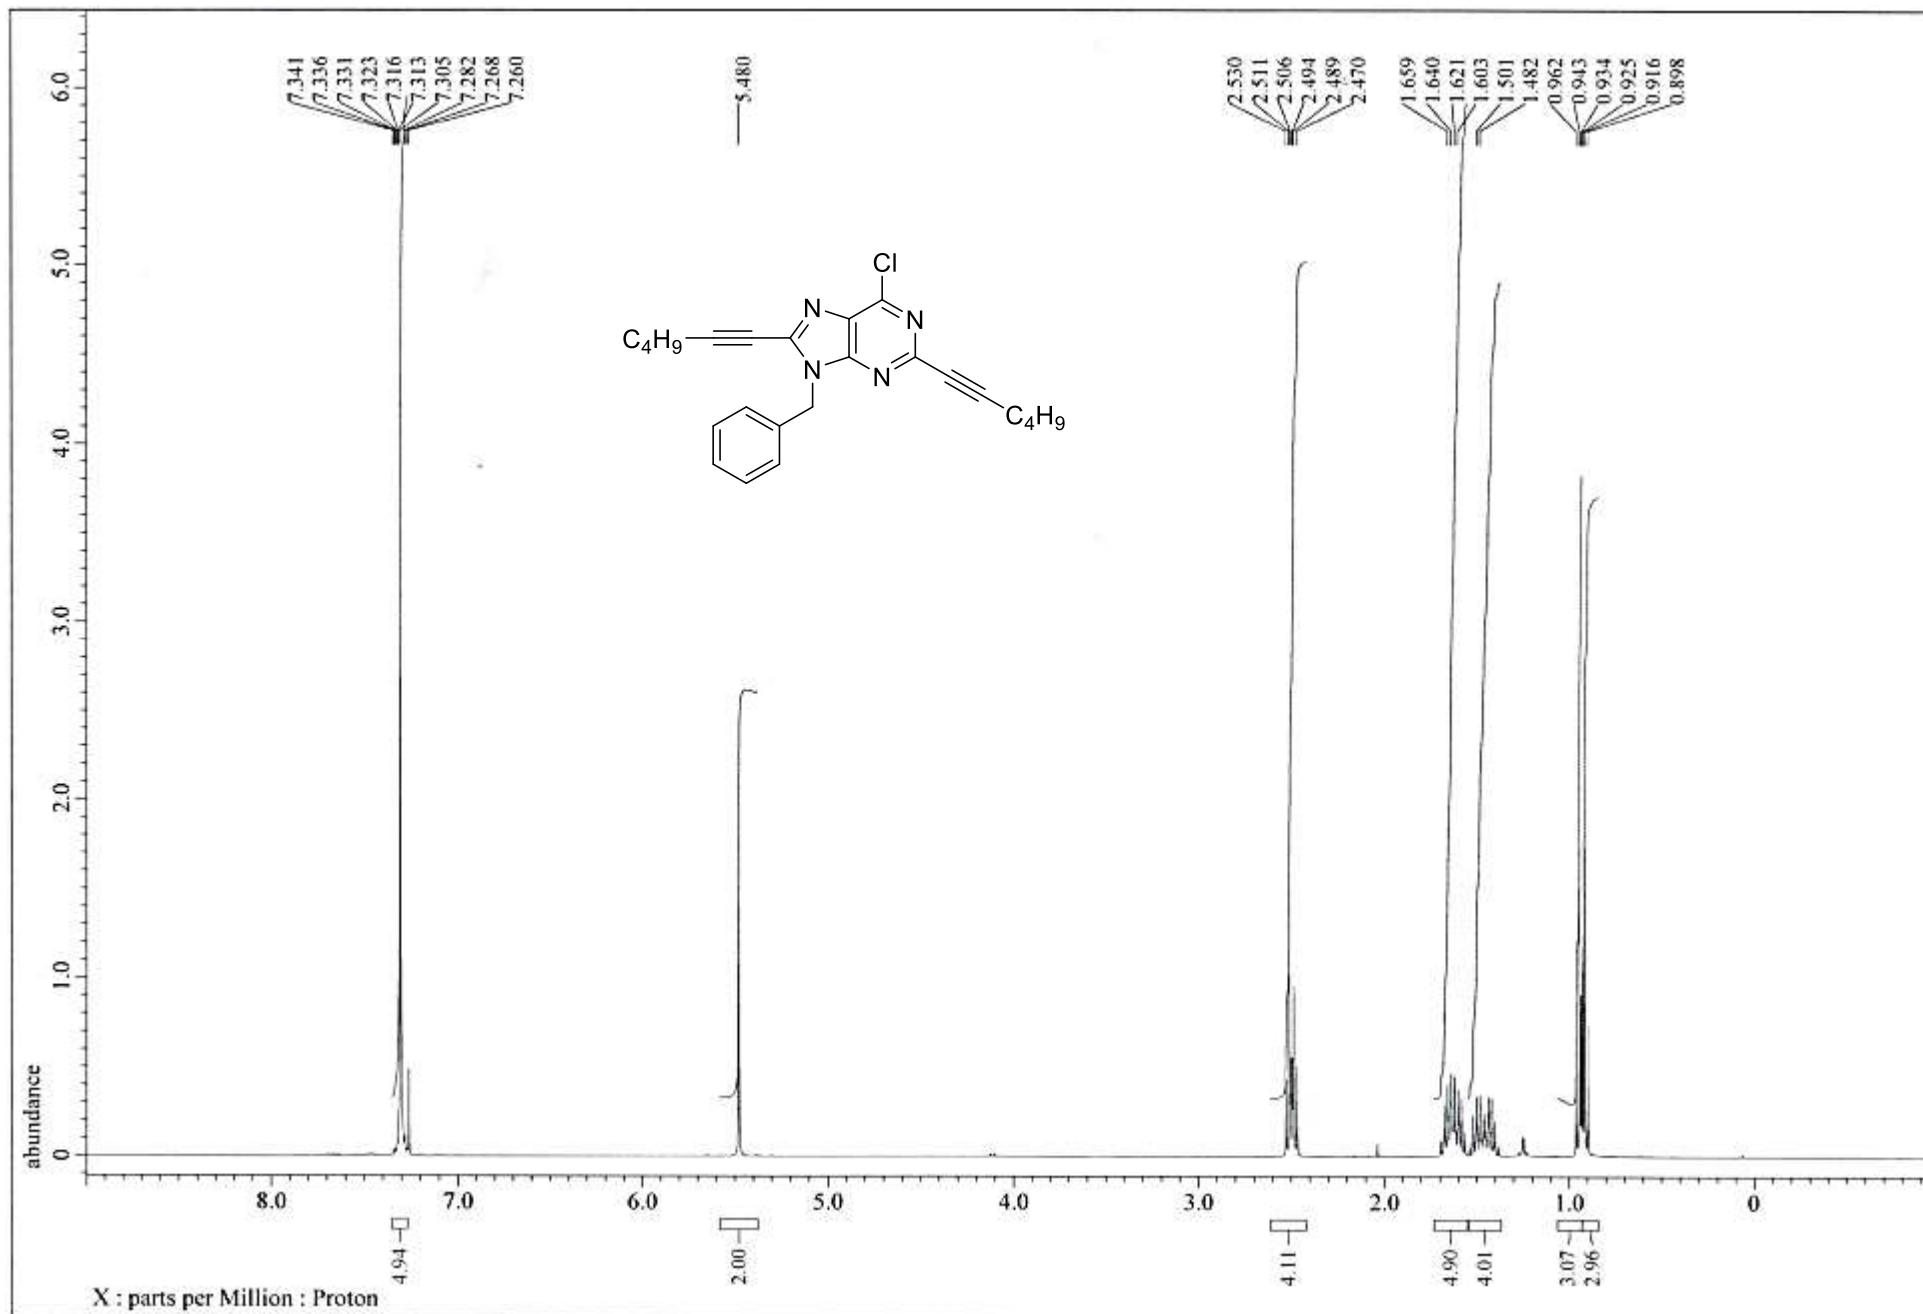

<sup>13</sup>C NMR (100 MHz, CDCl<sub>3</sub>) of 5c

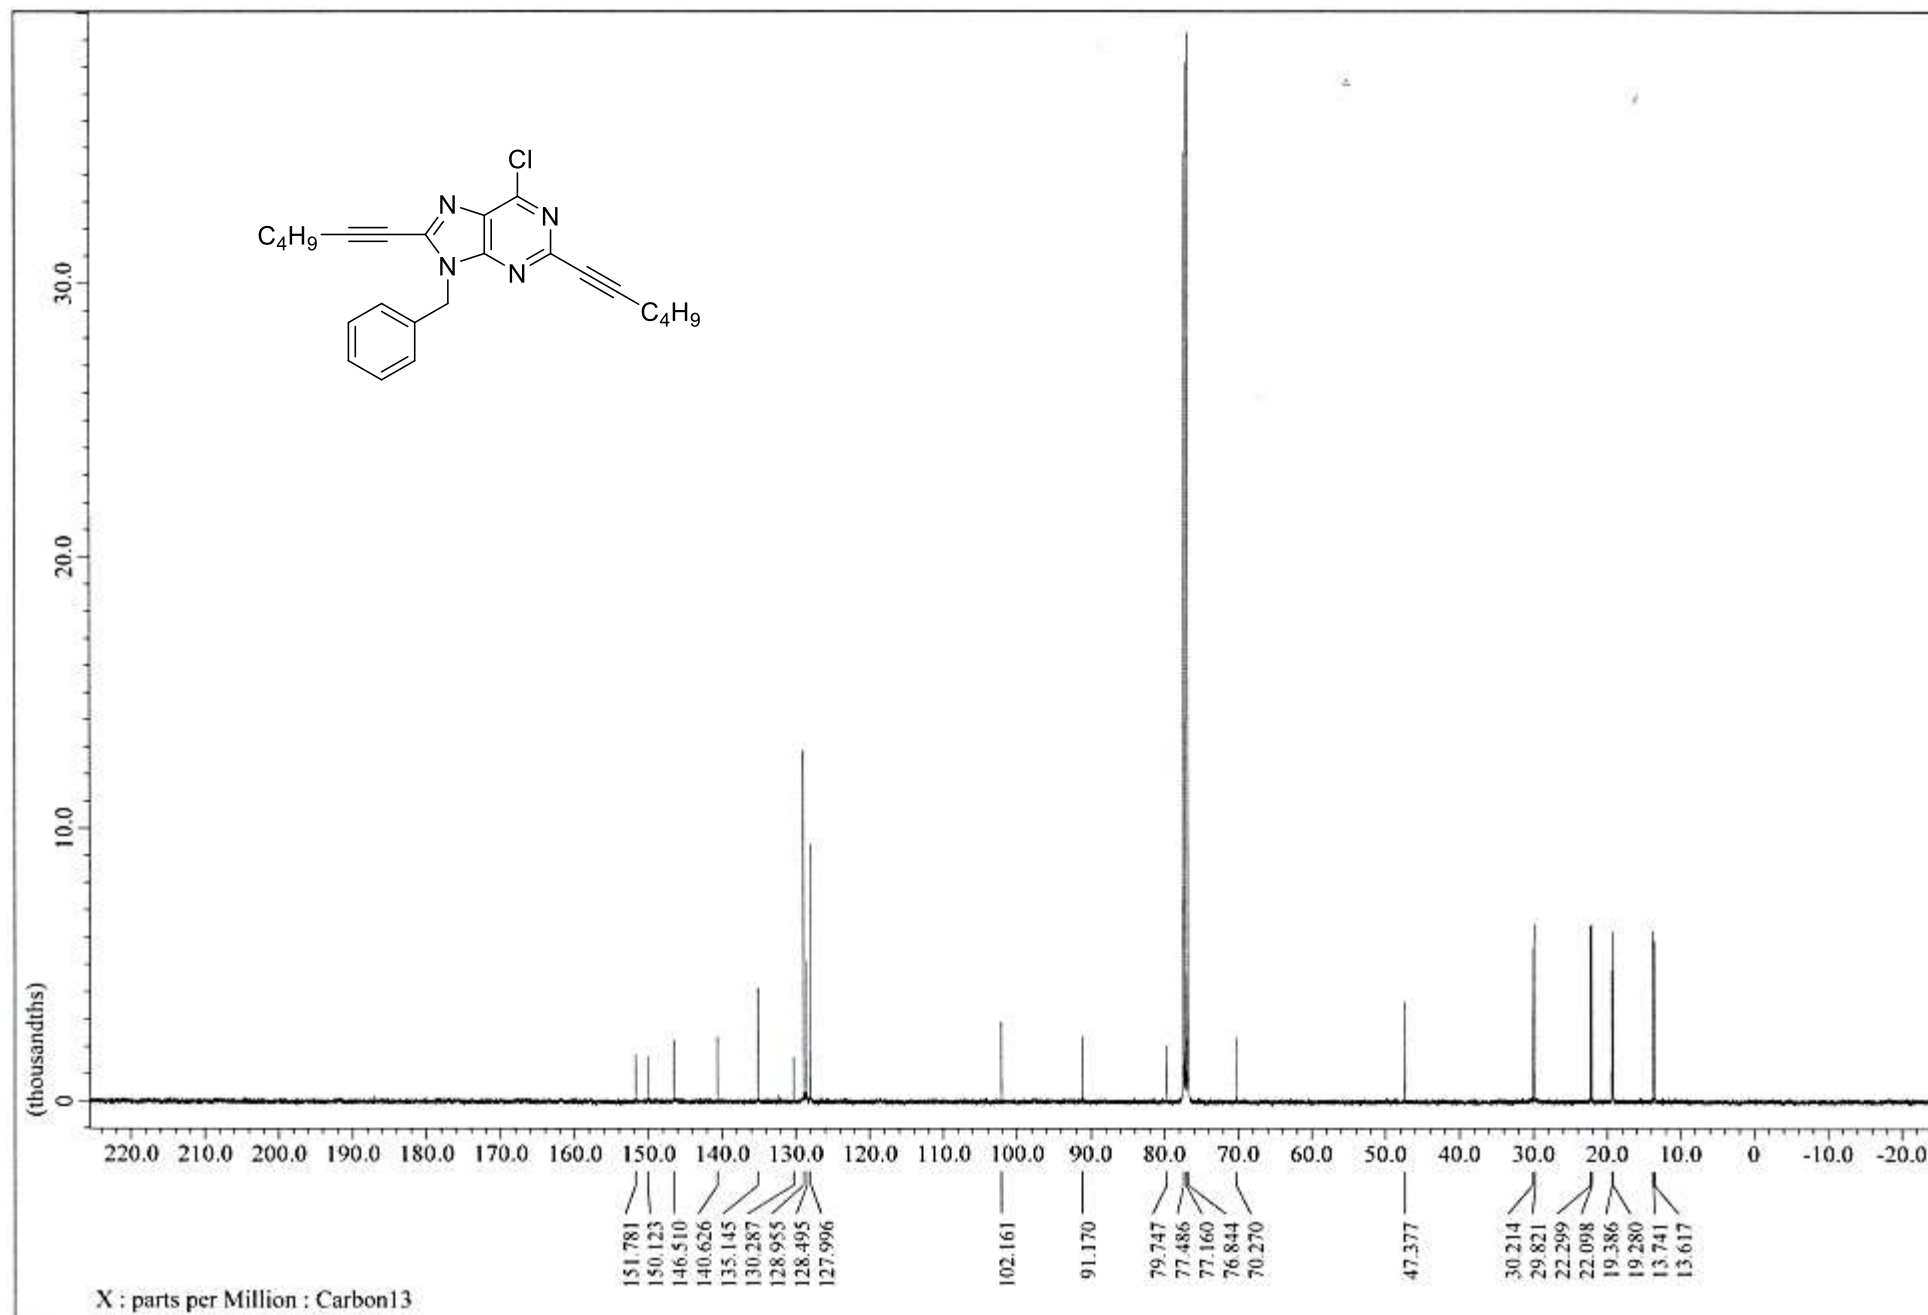

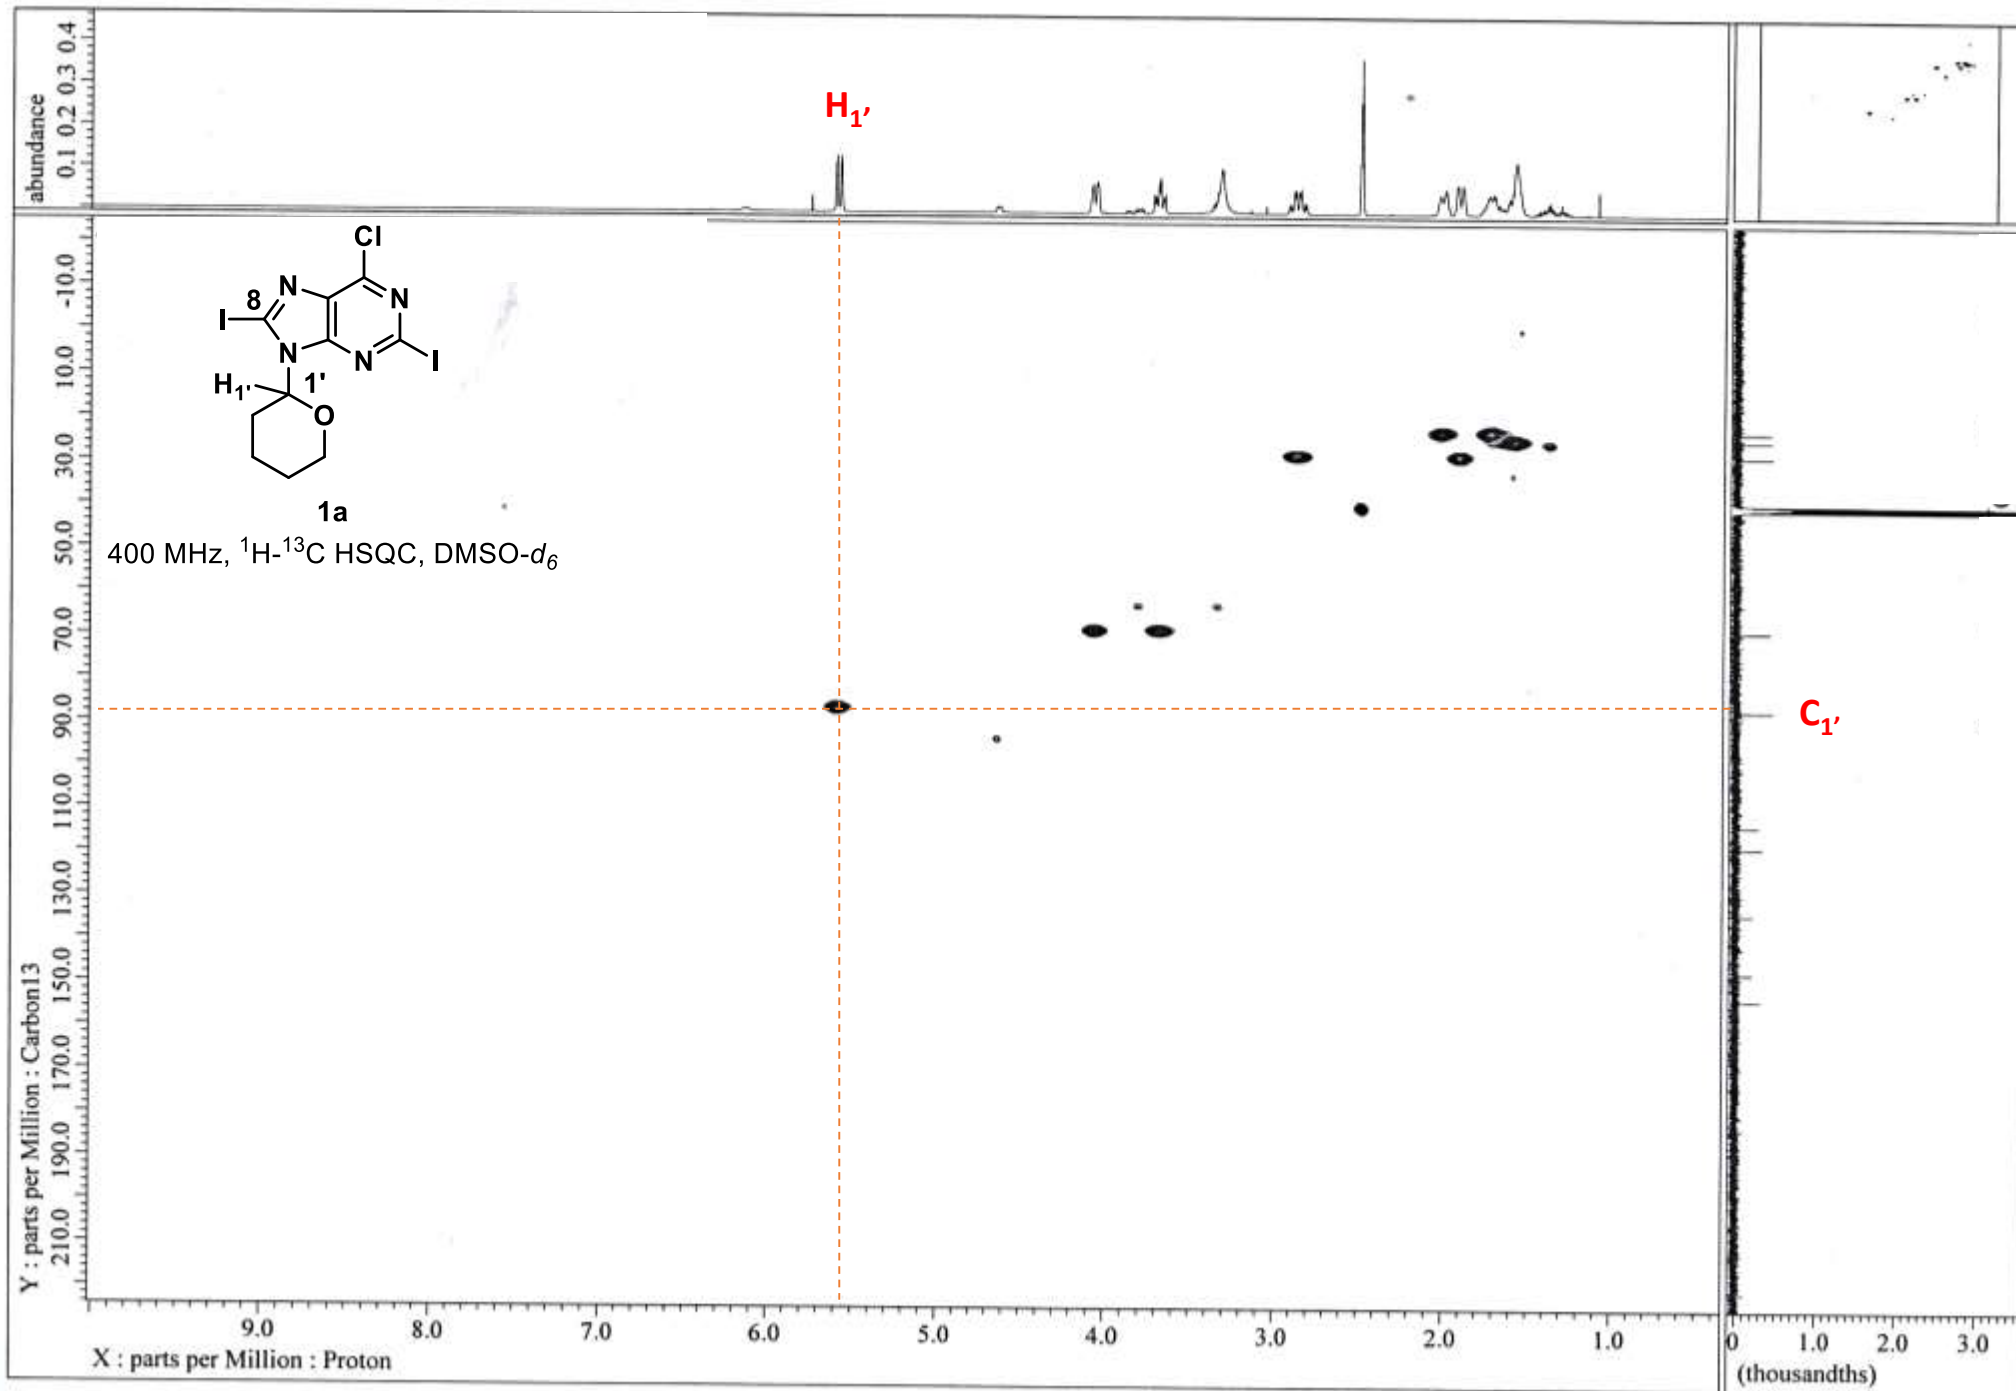

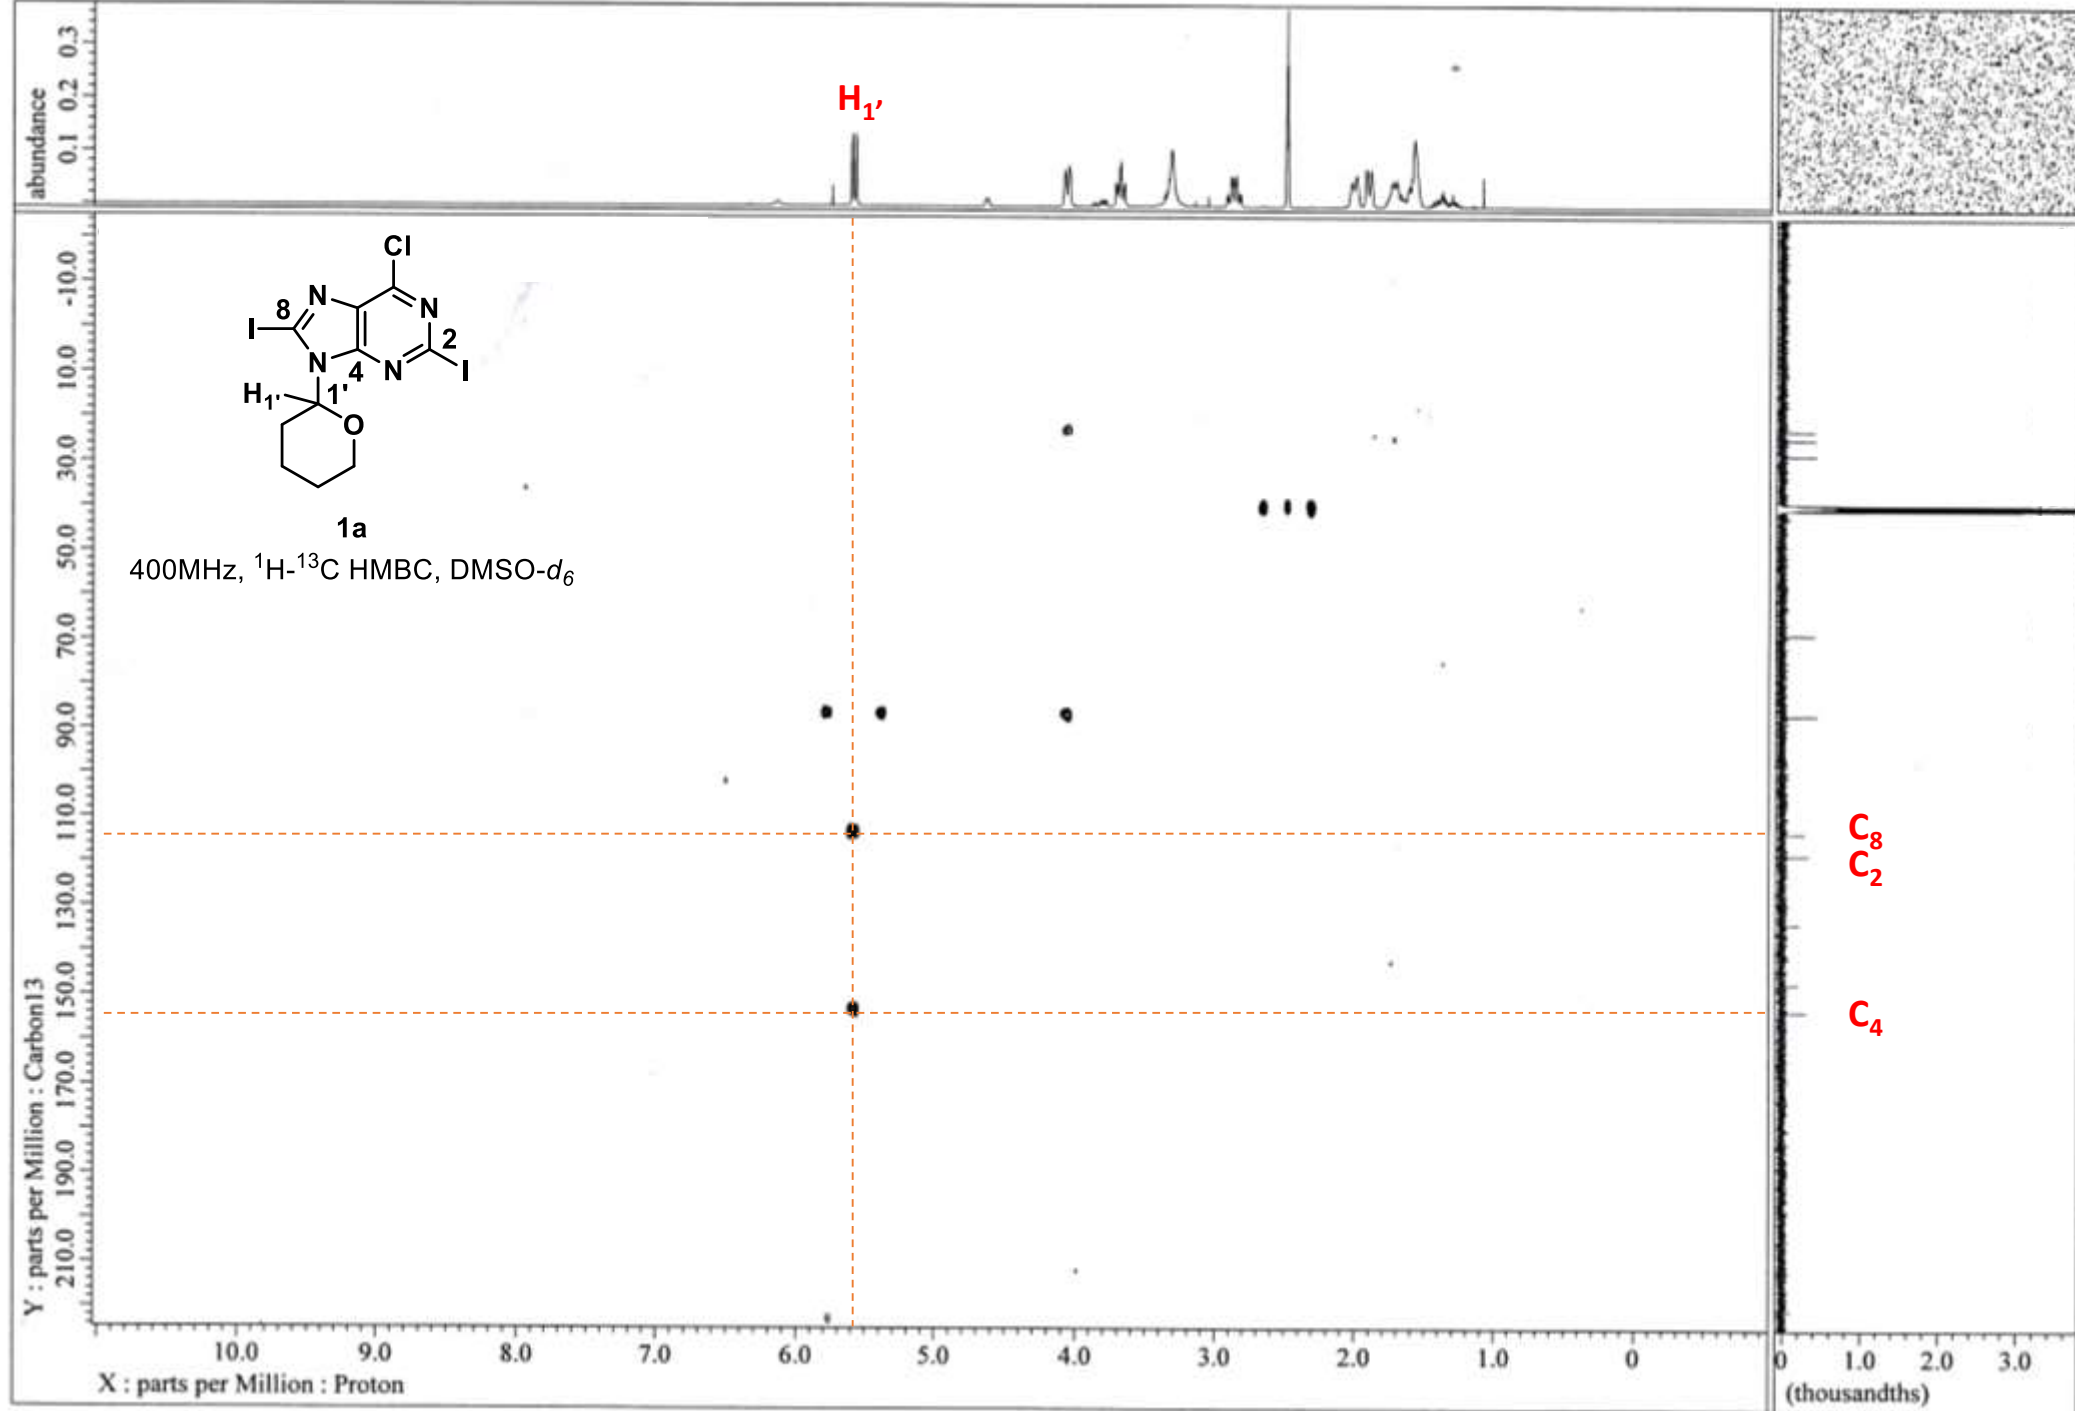

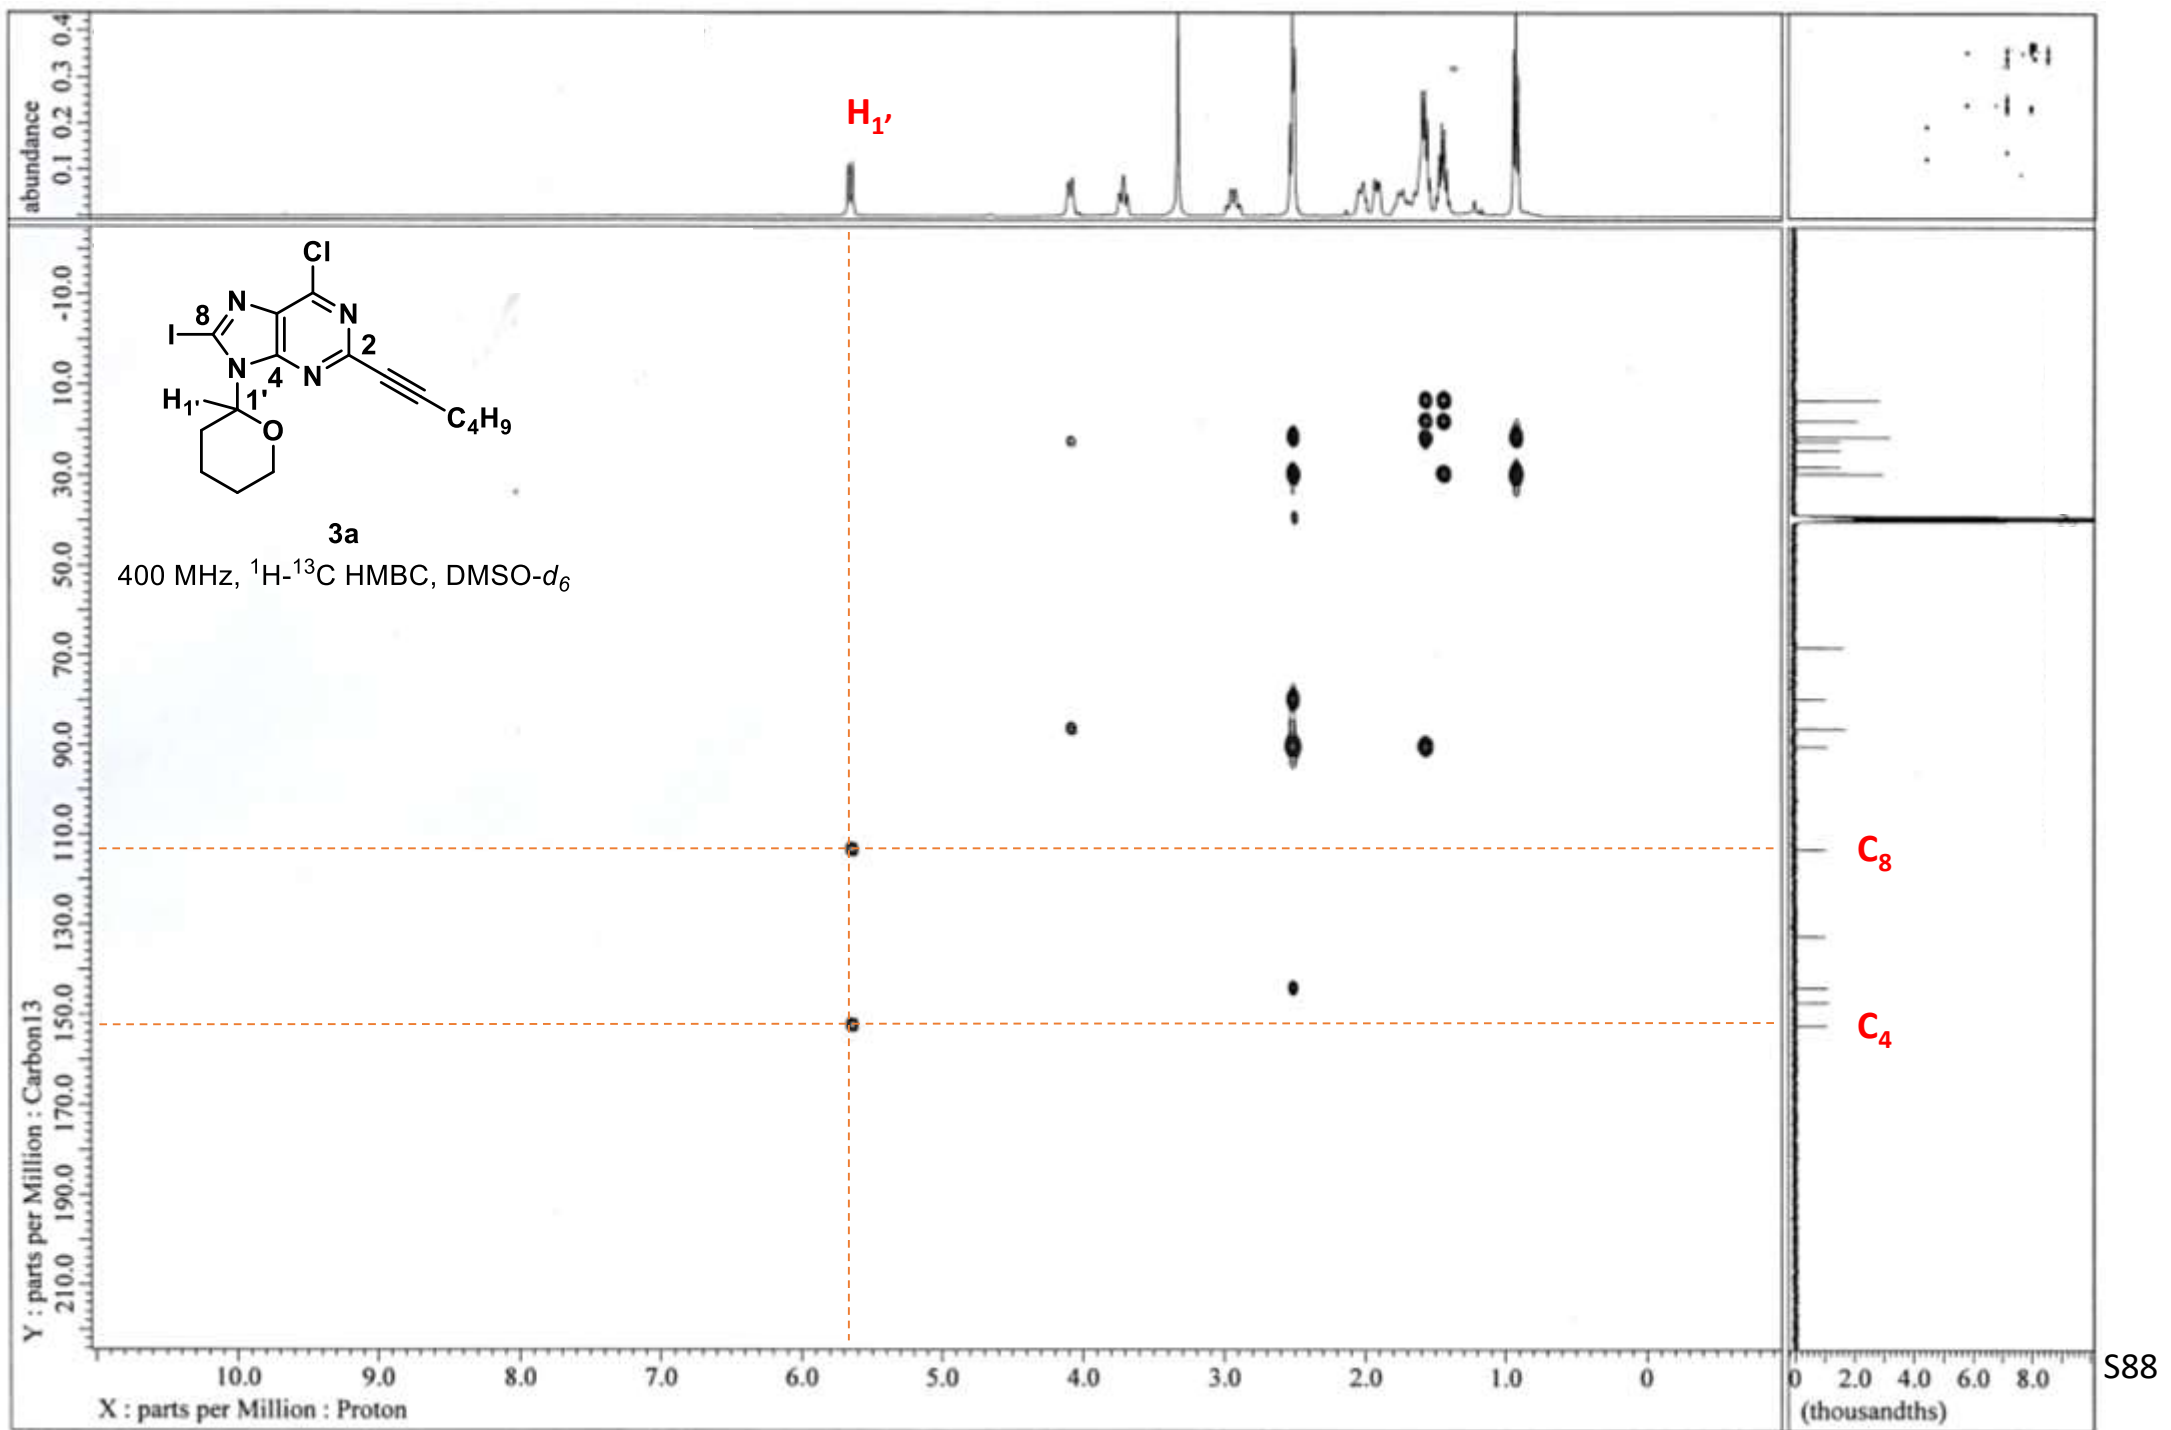



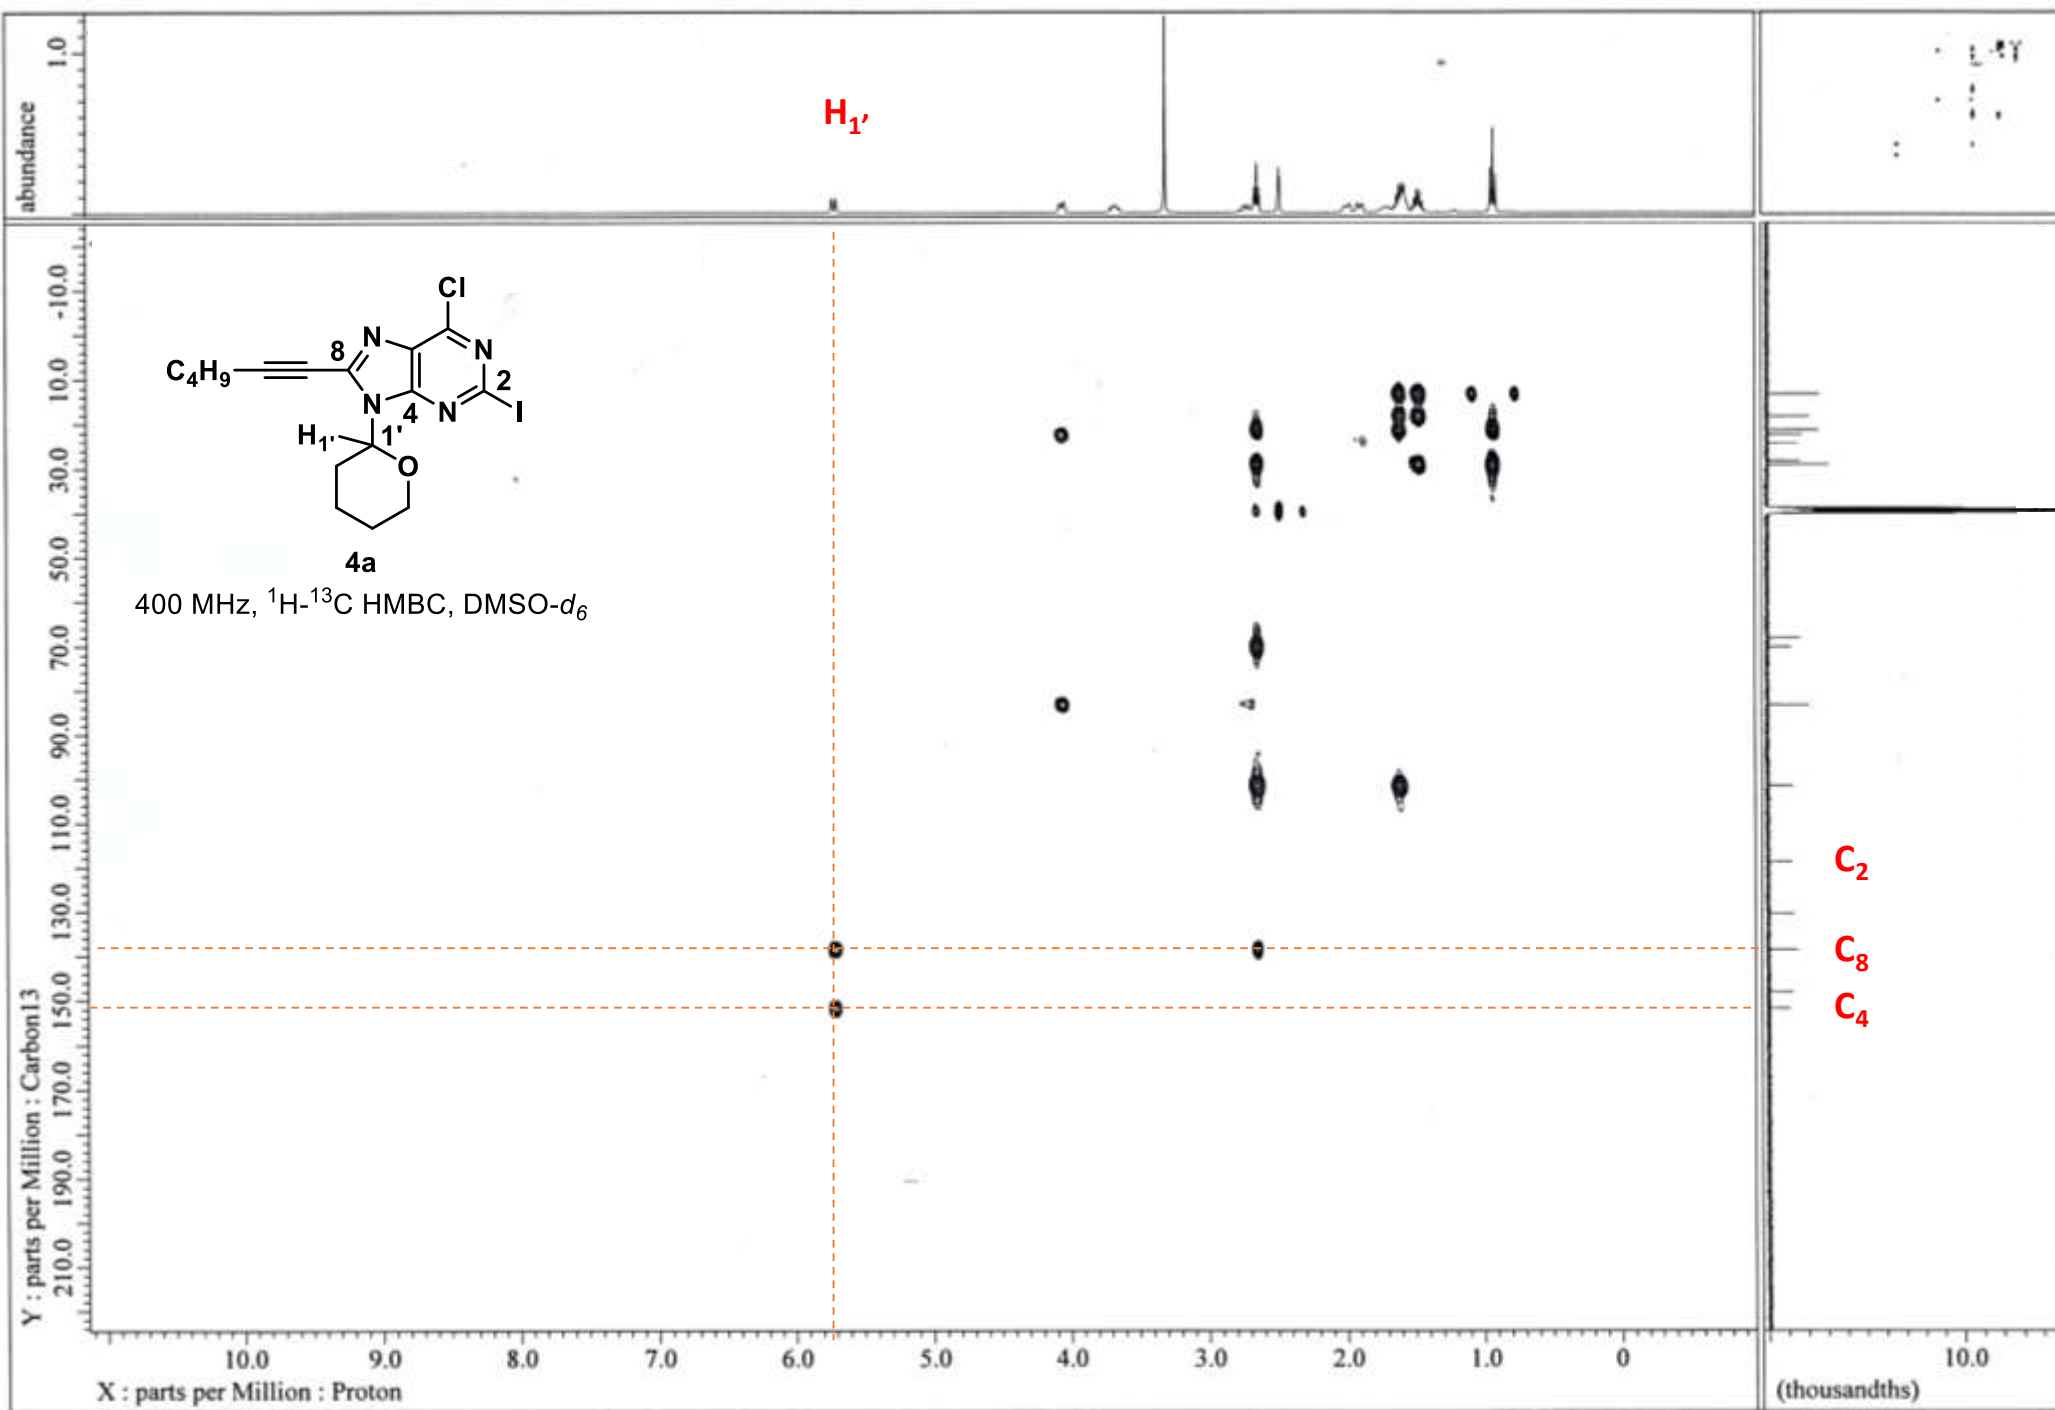

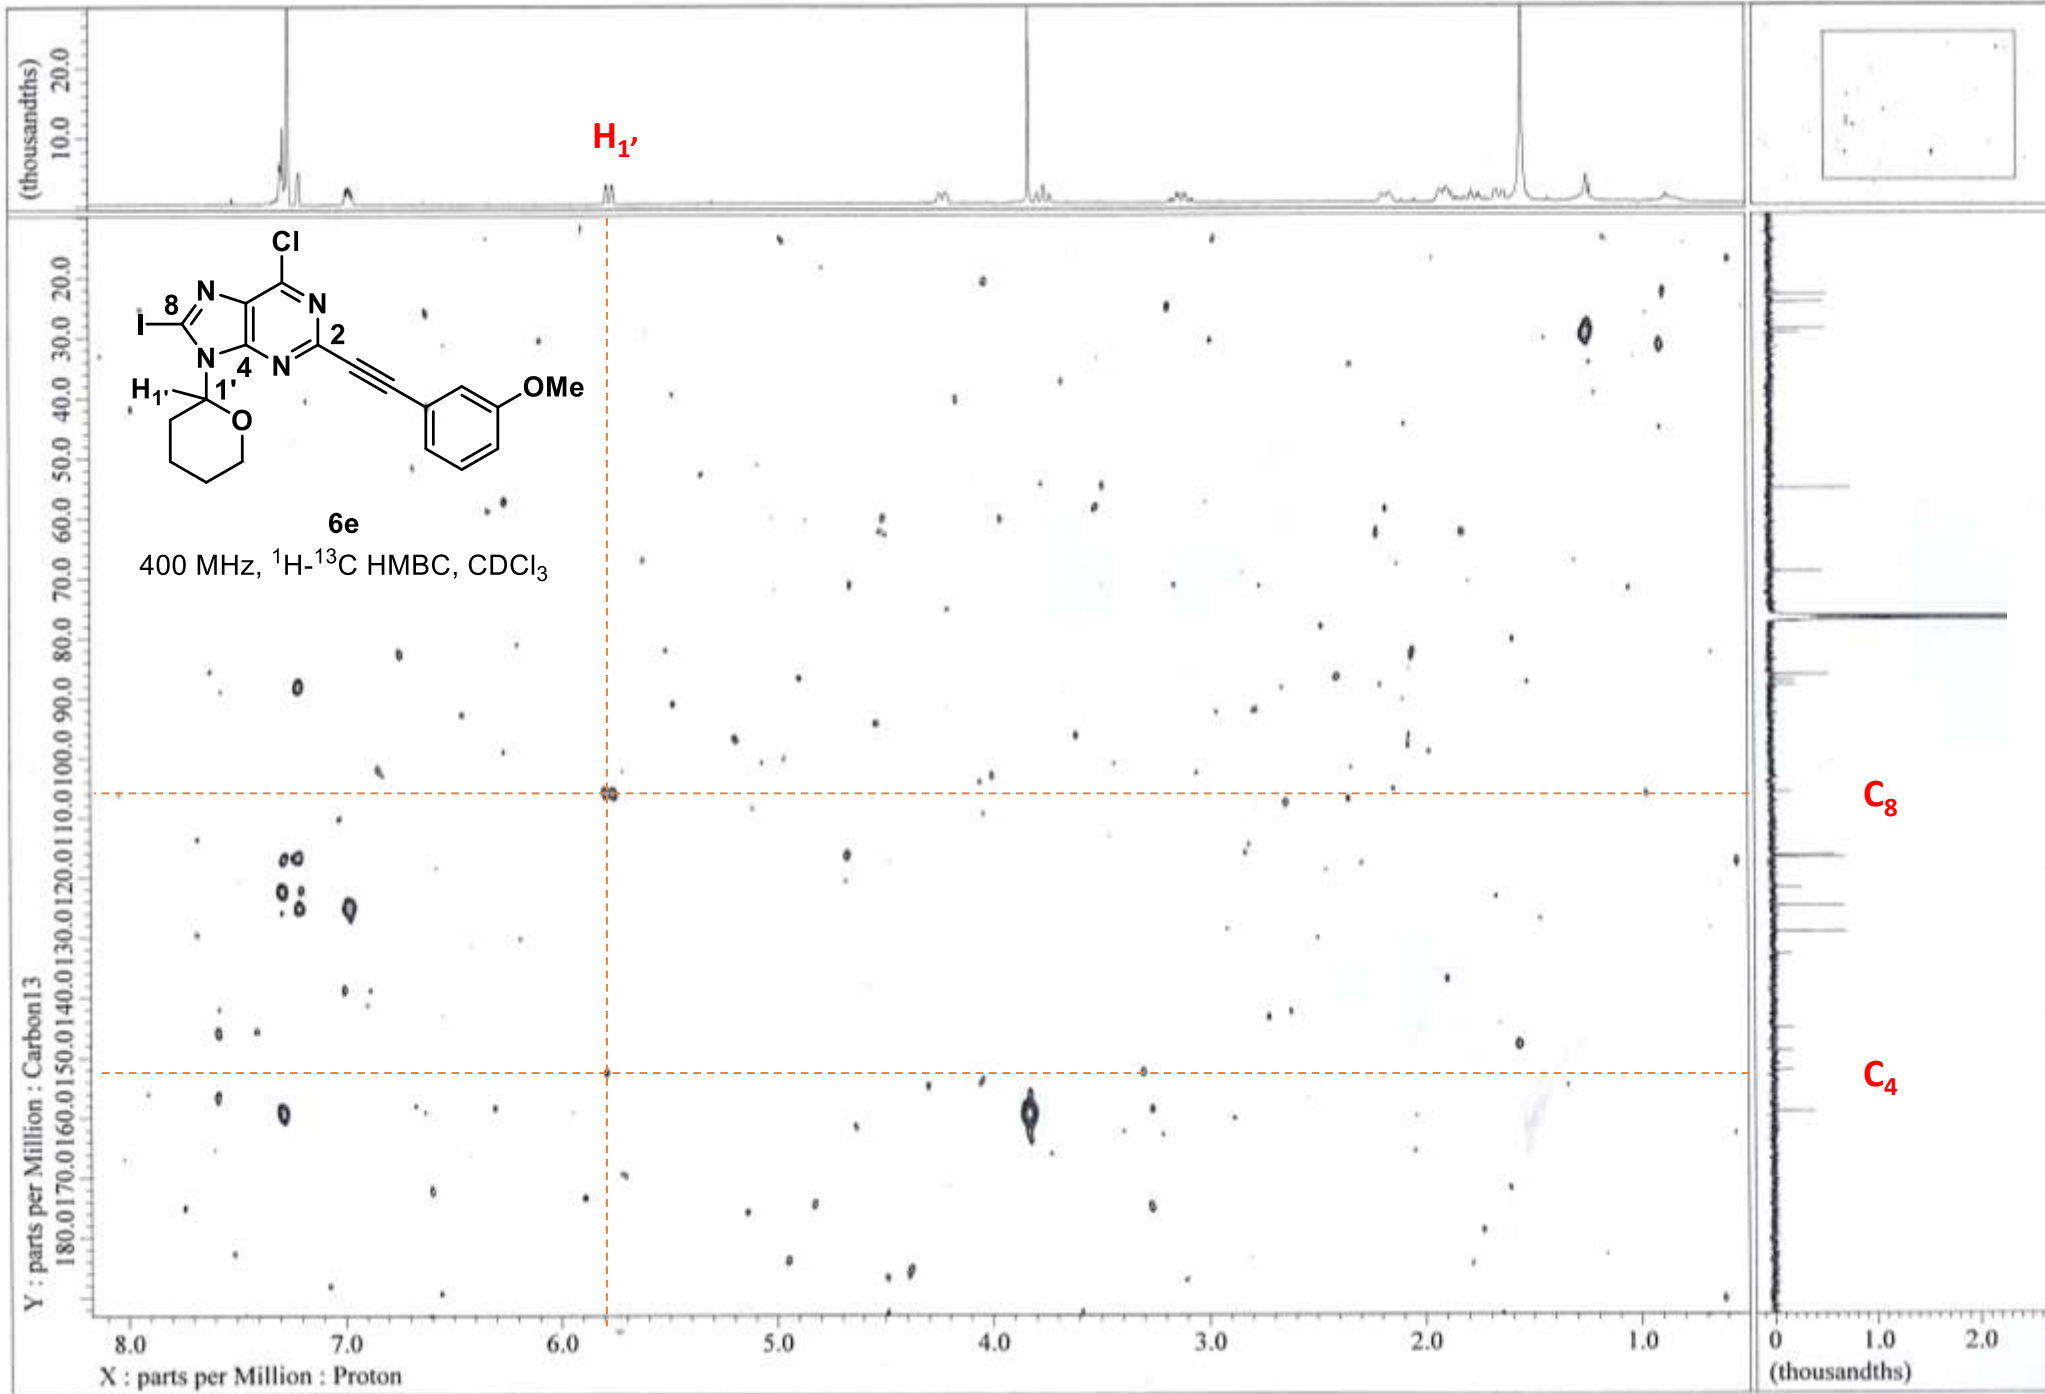

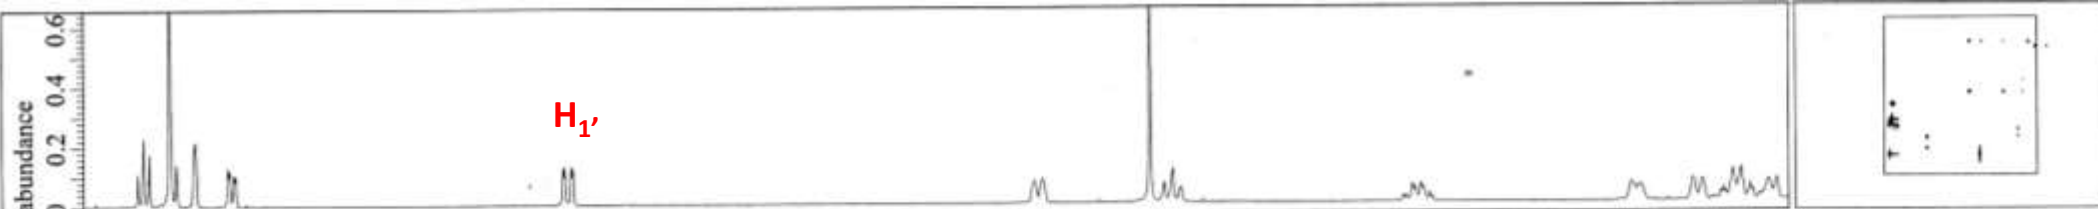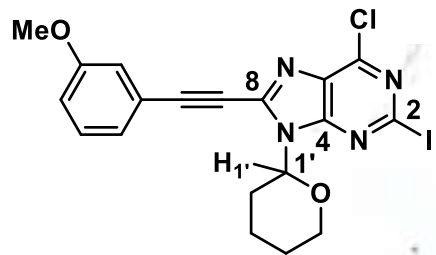

7e

400 MHz, <sup>1</sup>H-<sup>13</sup>C HMBC, CDCl<sub>3</sub>

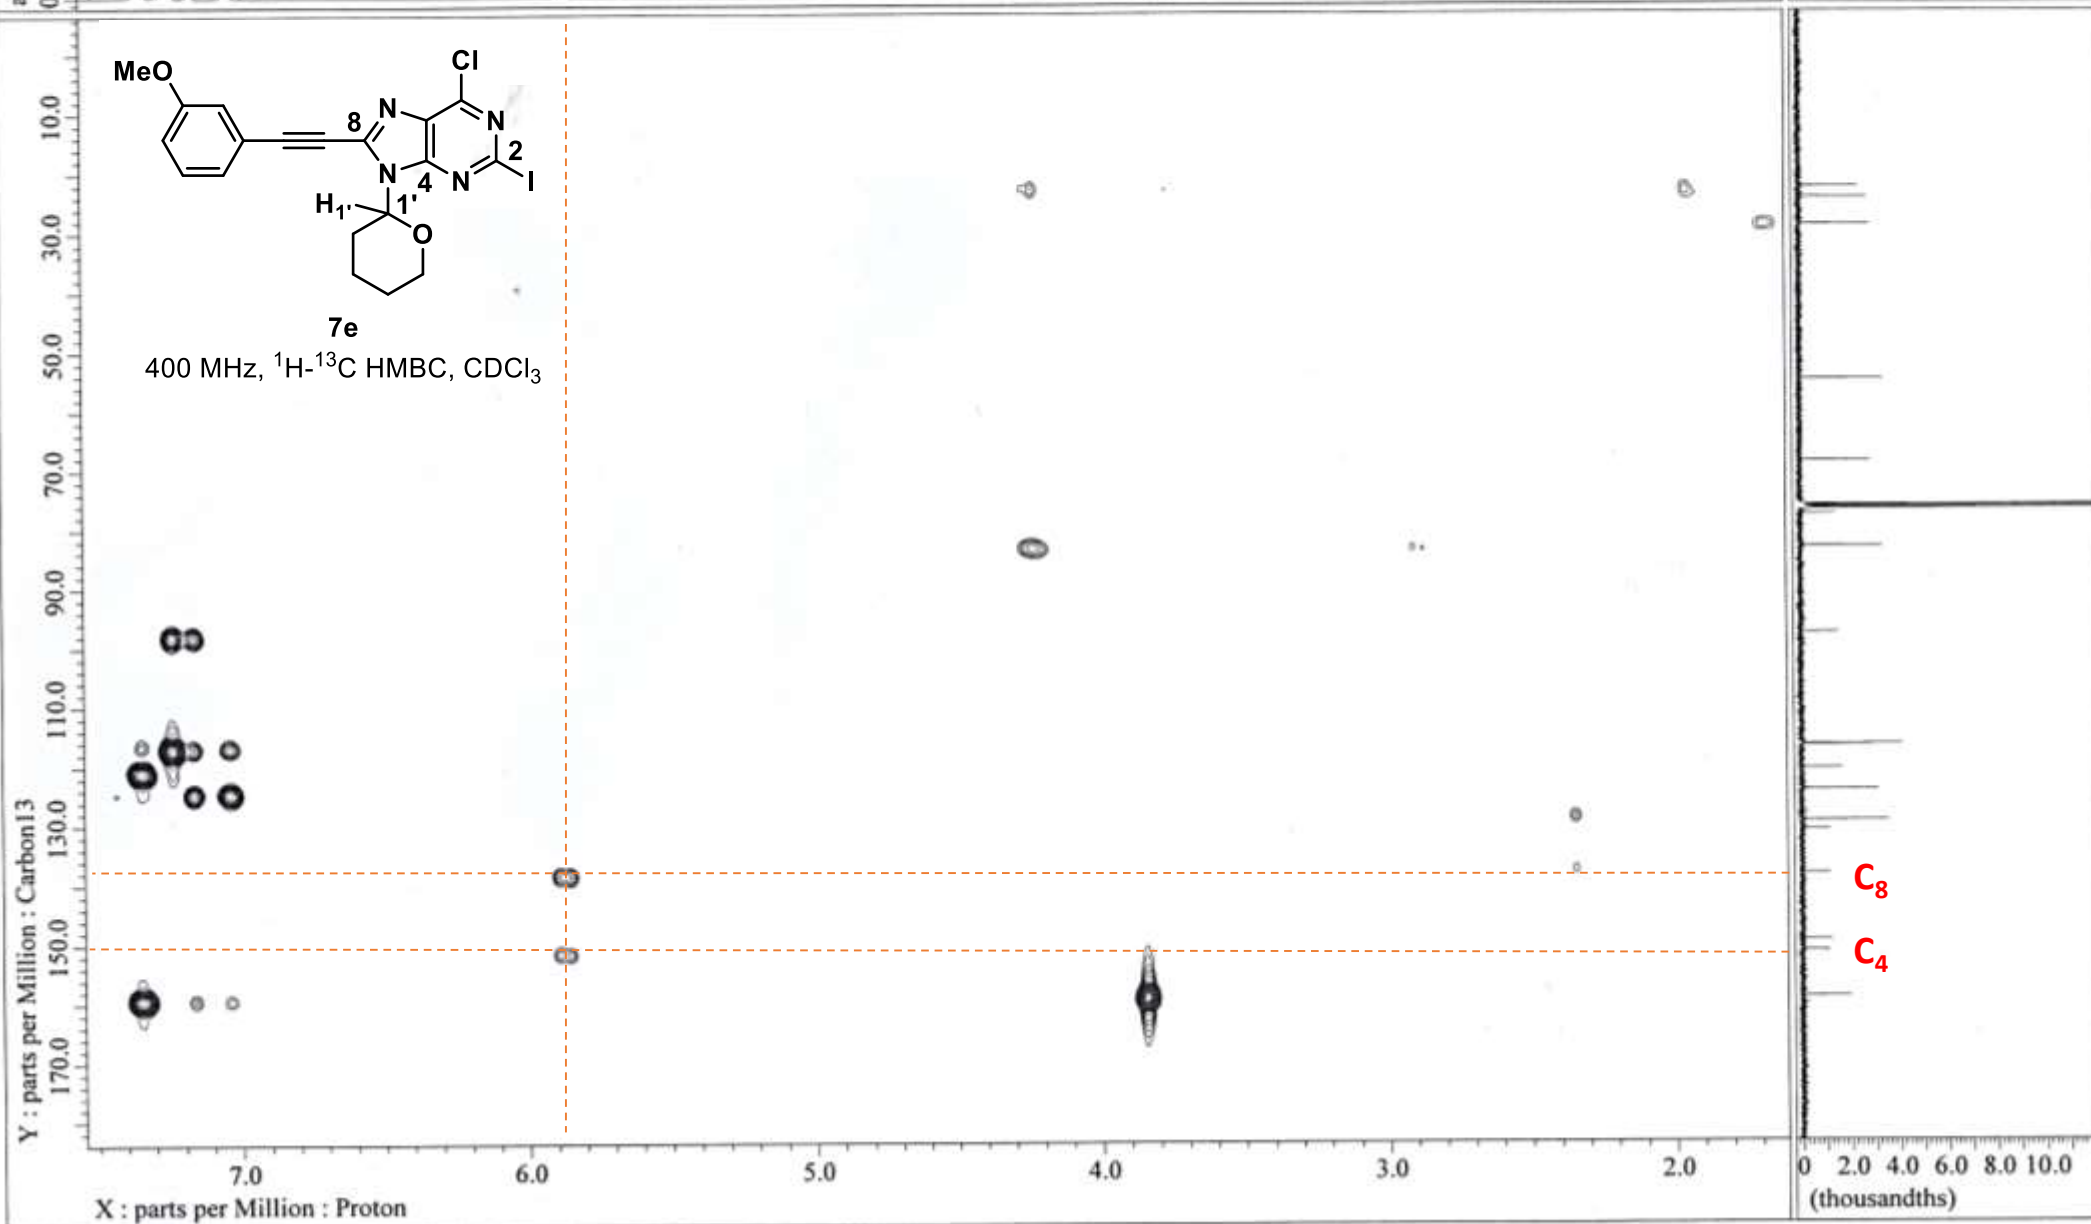

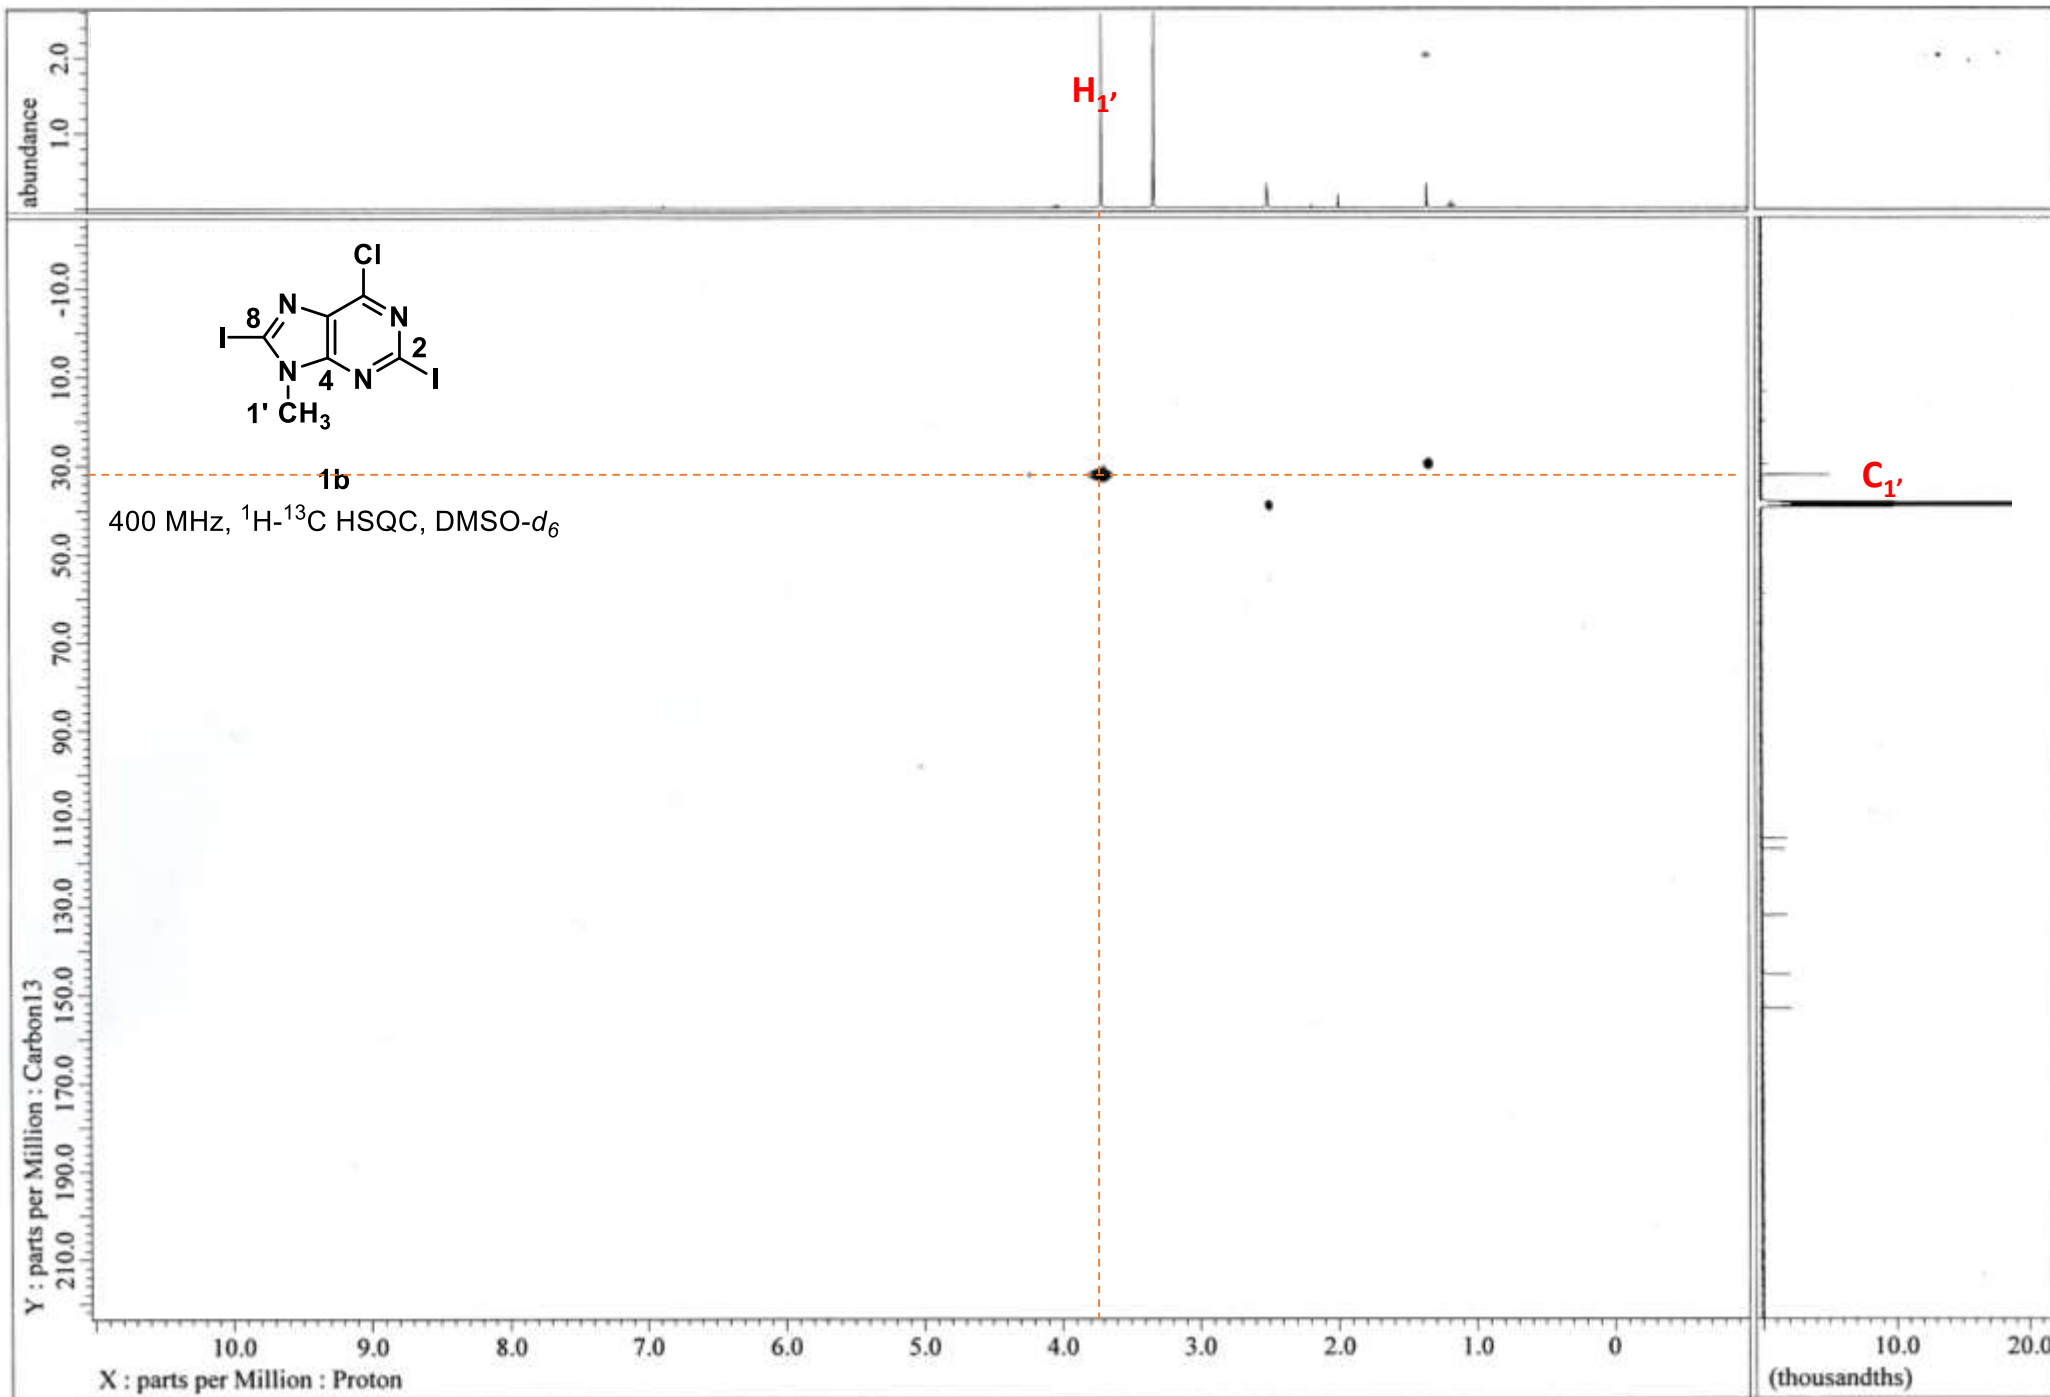

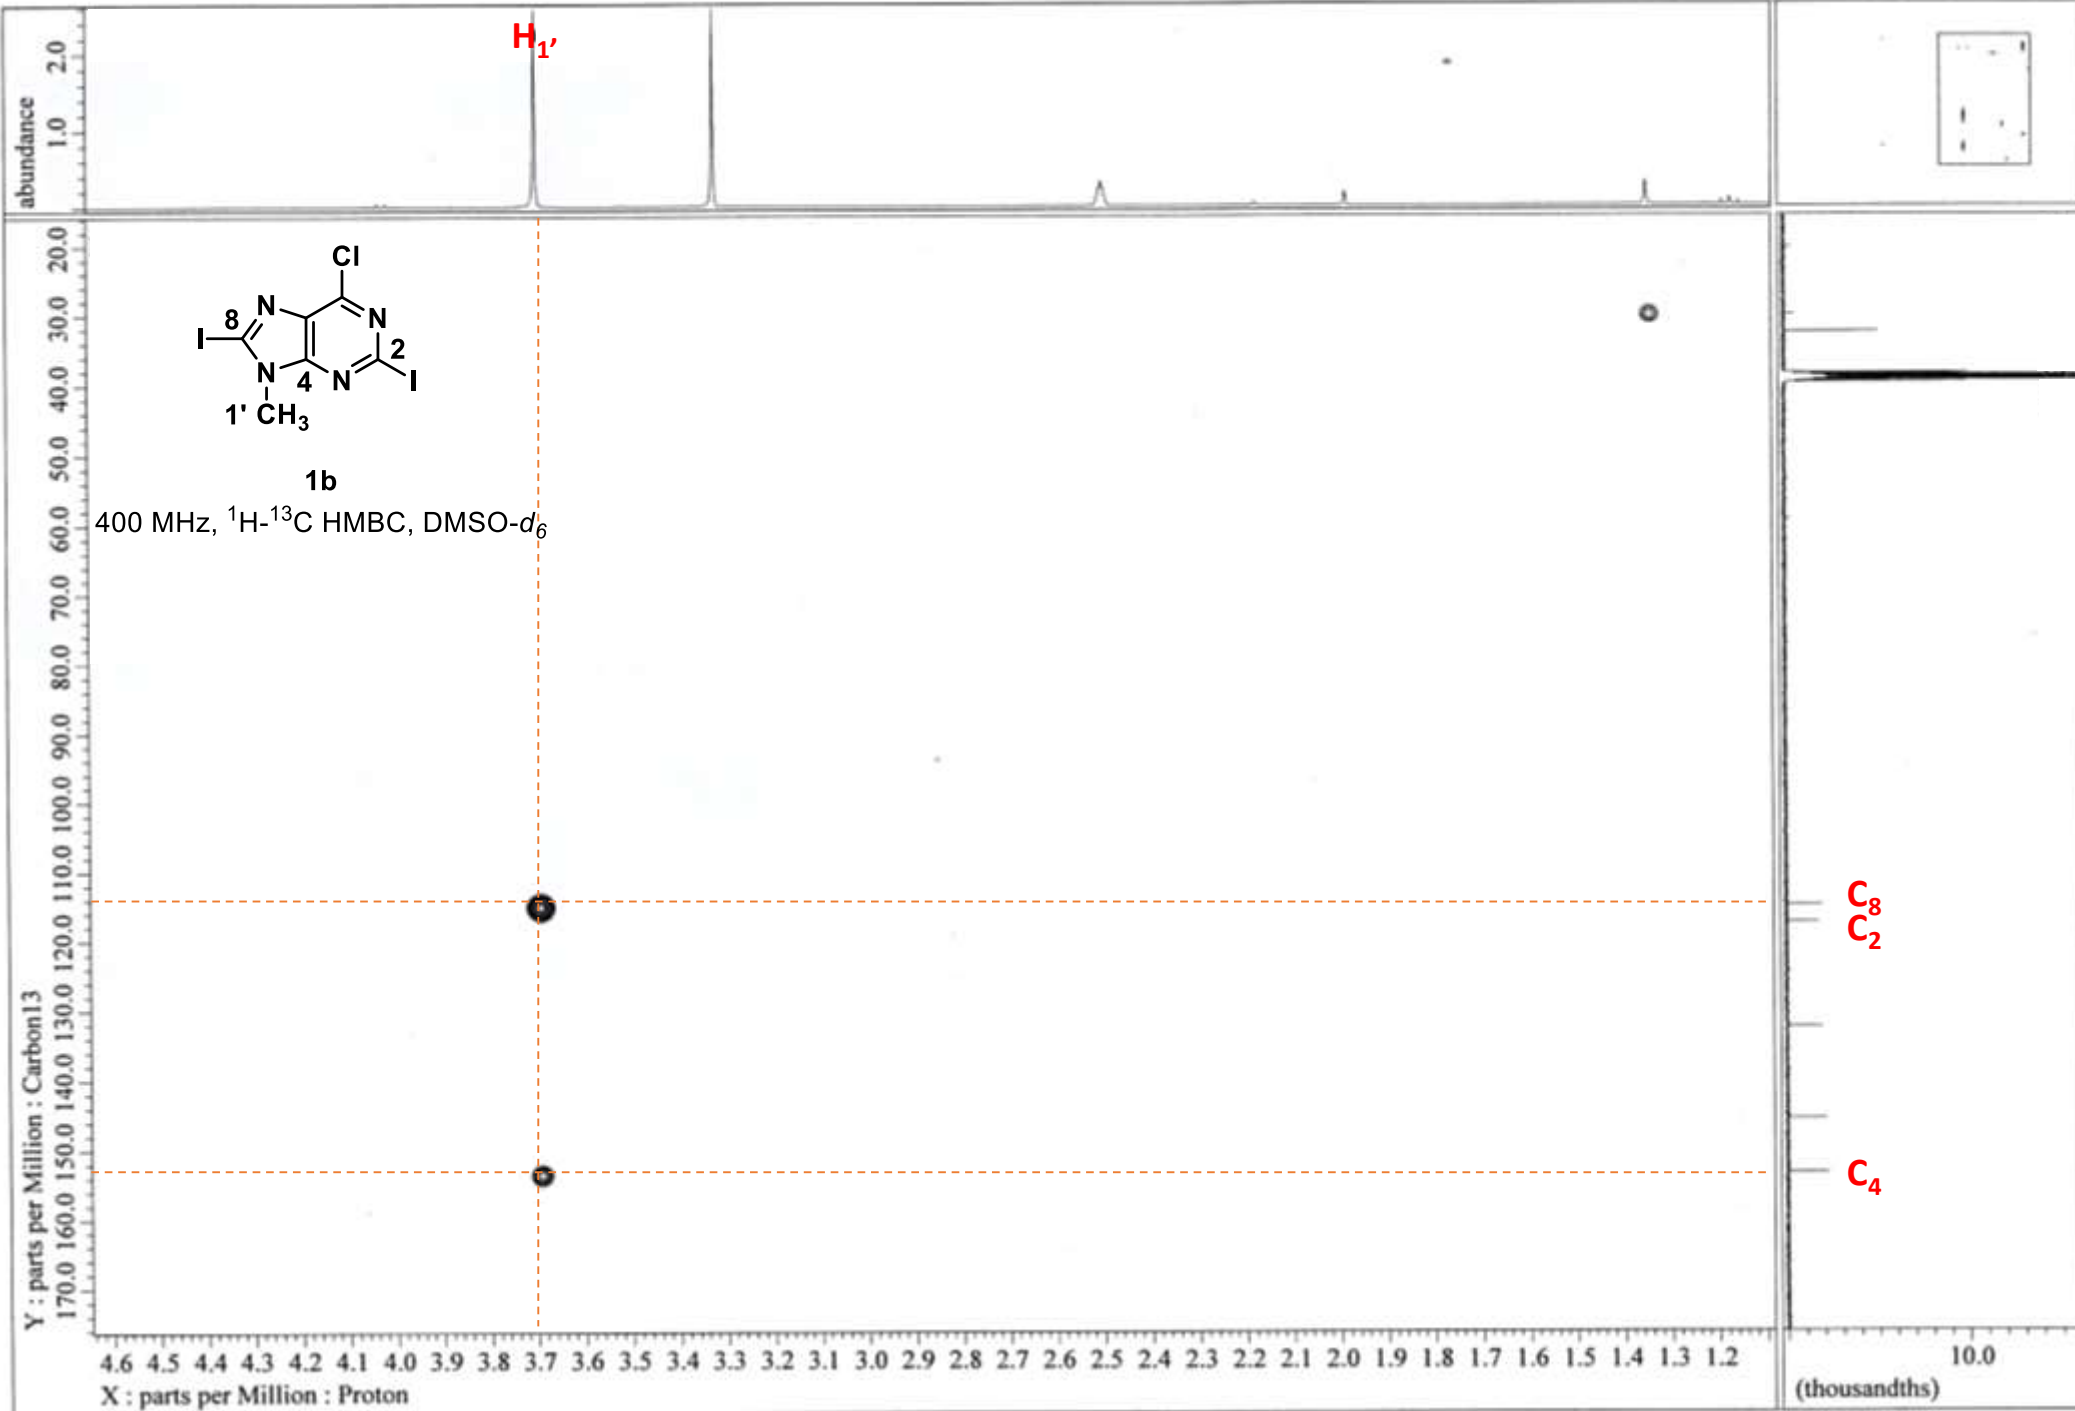

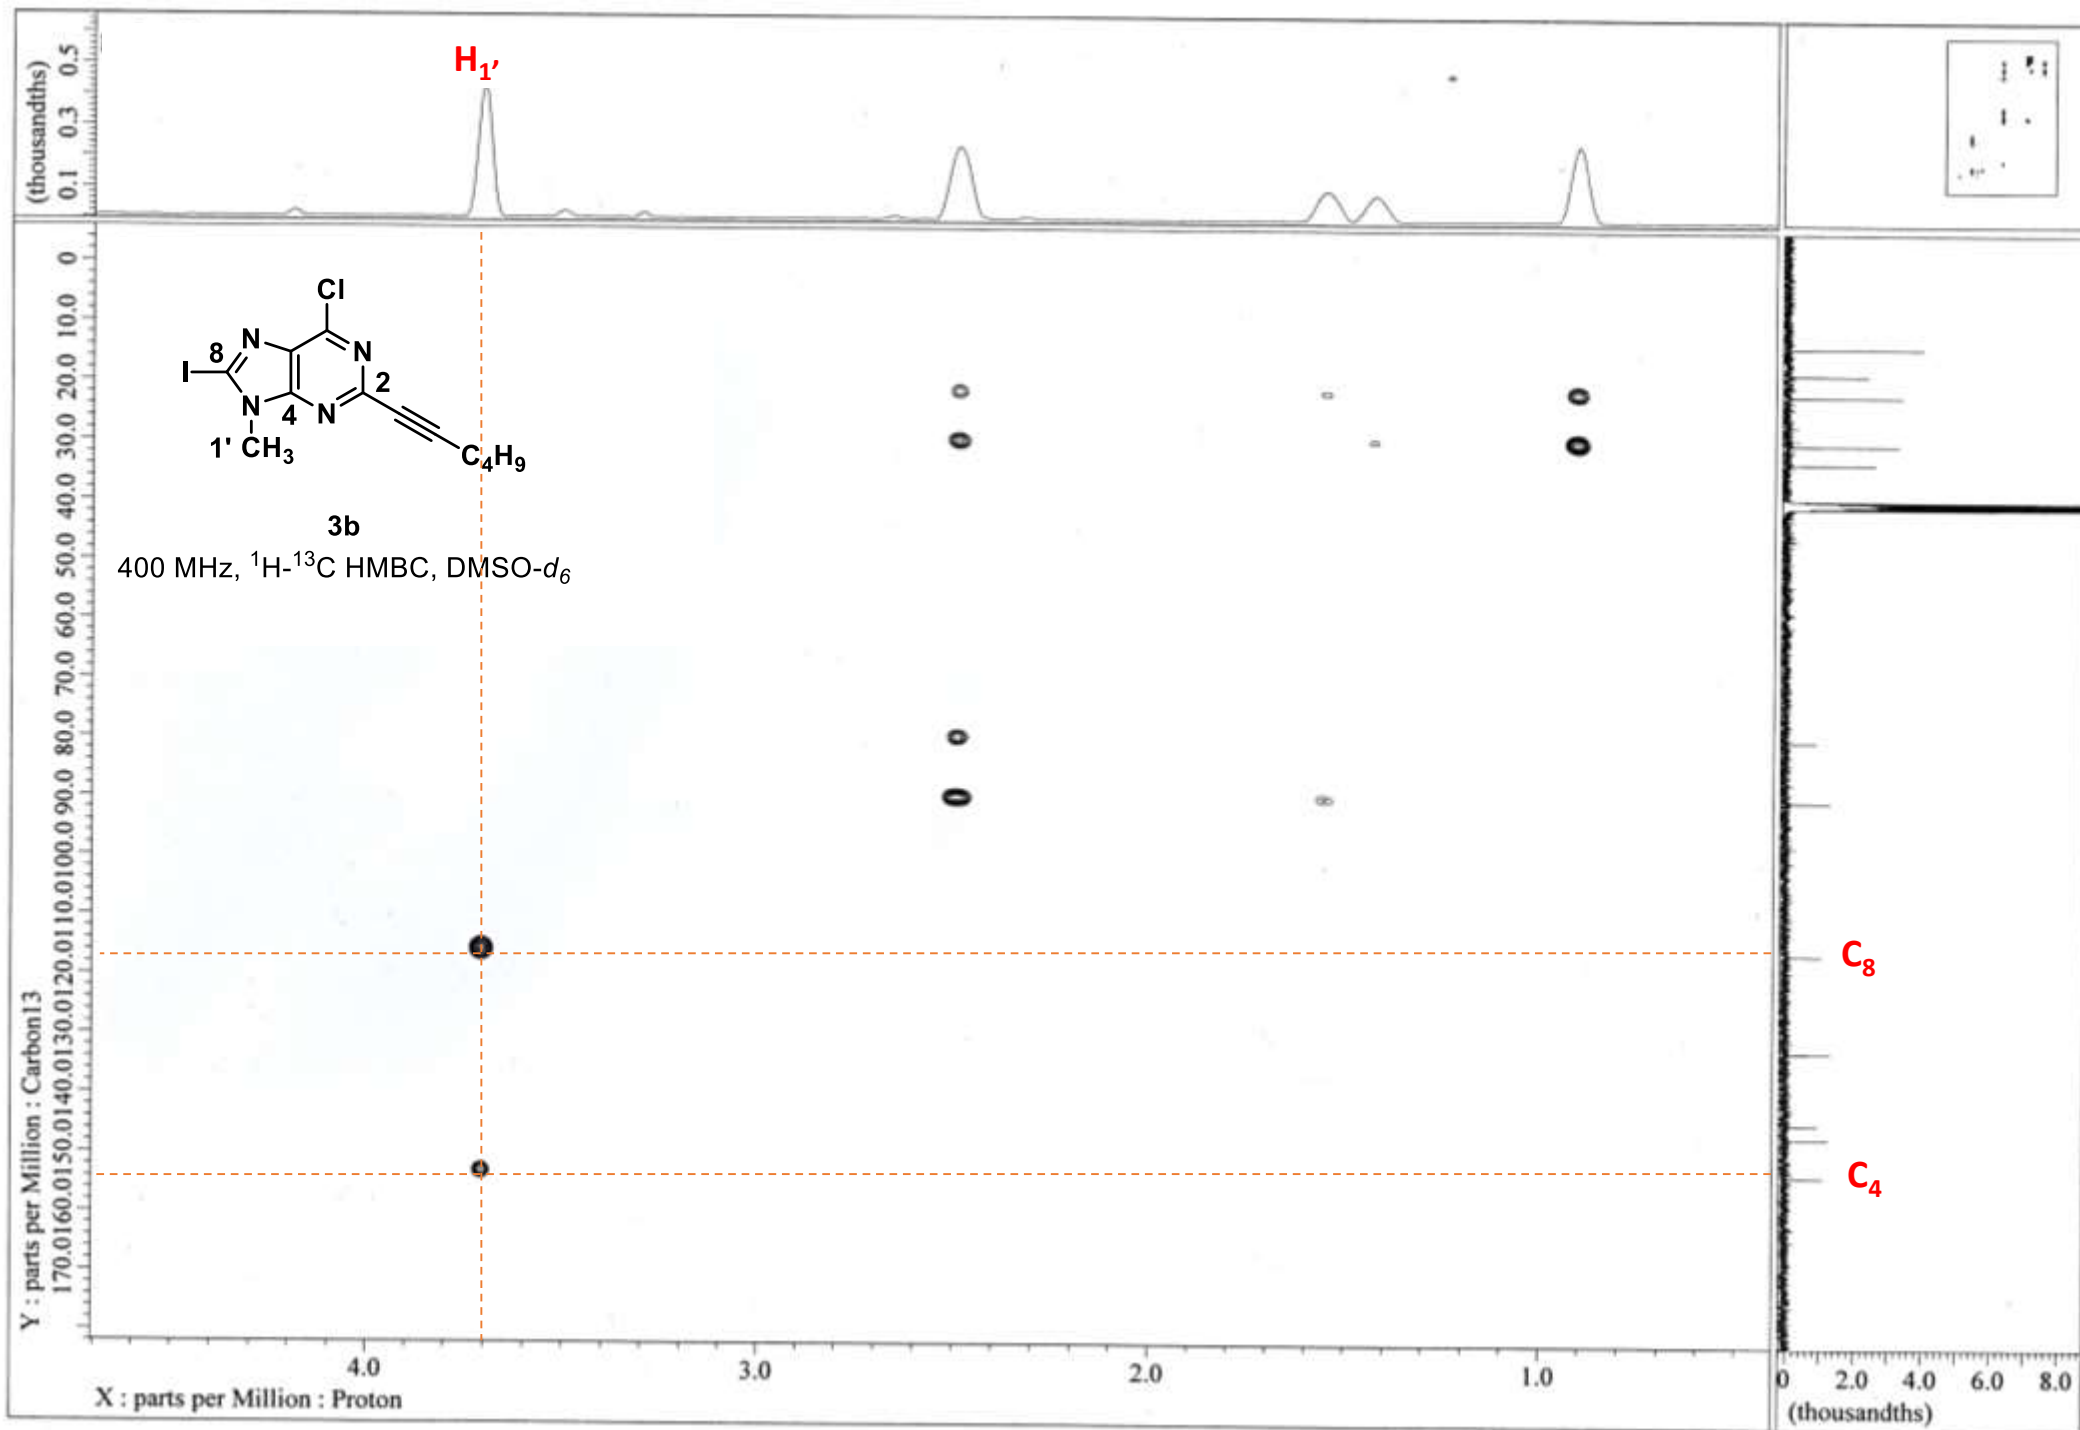

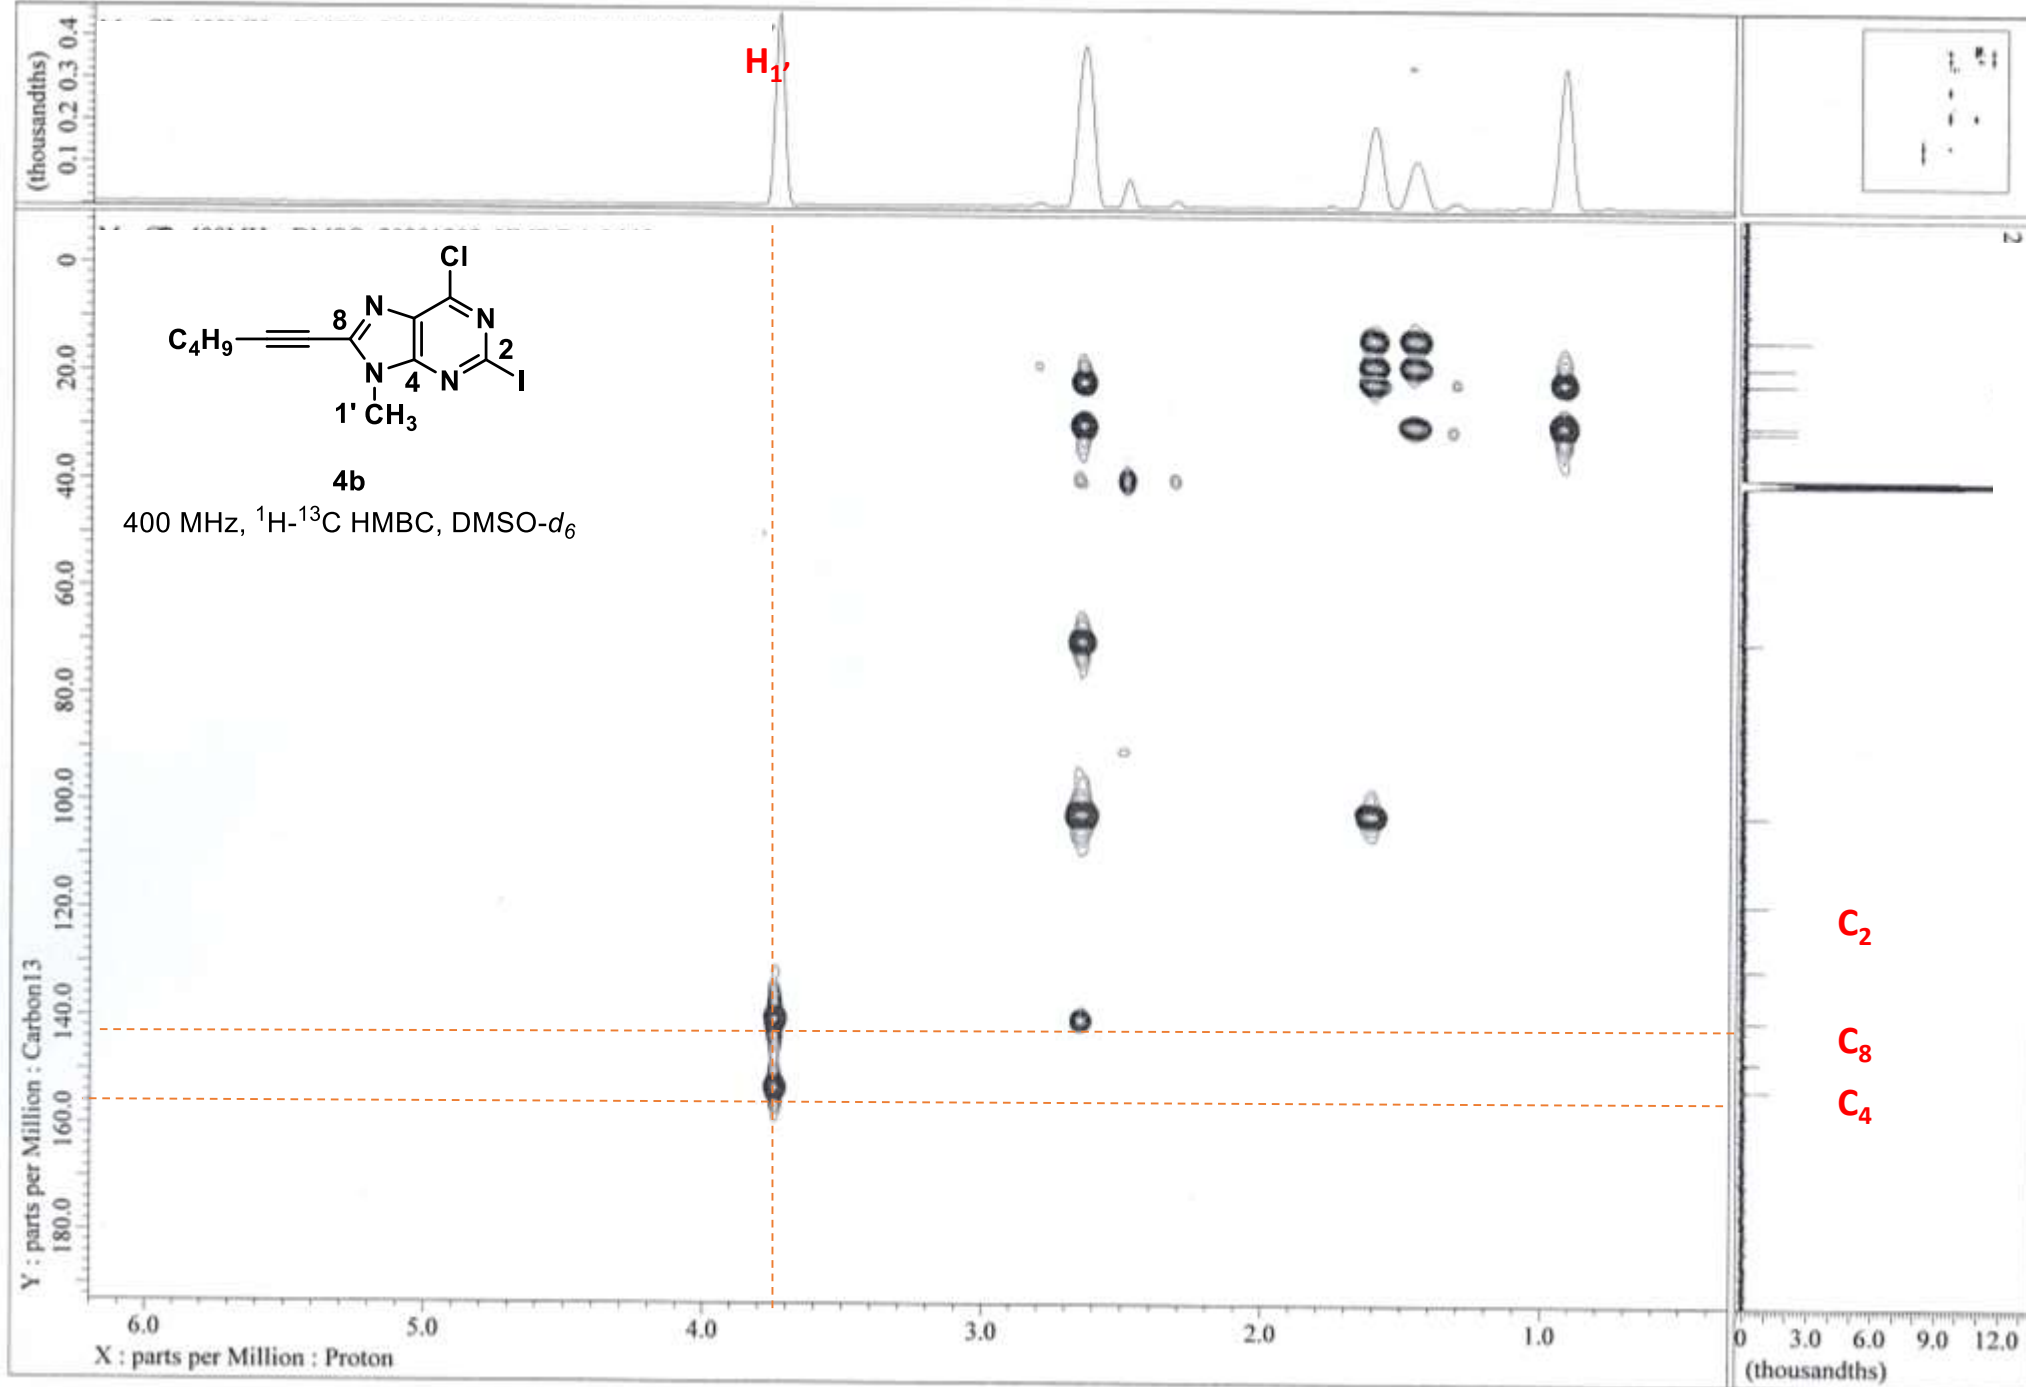

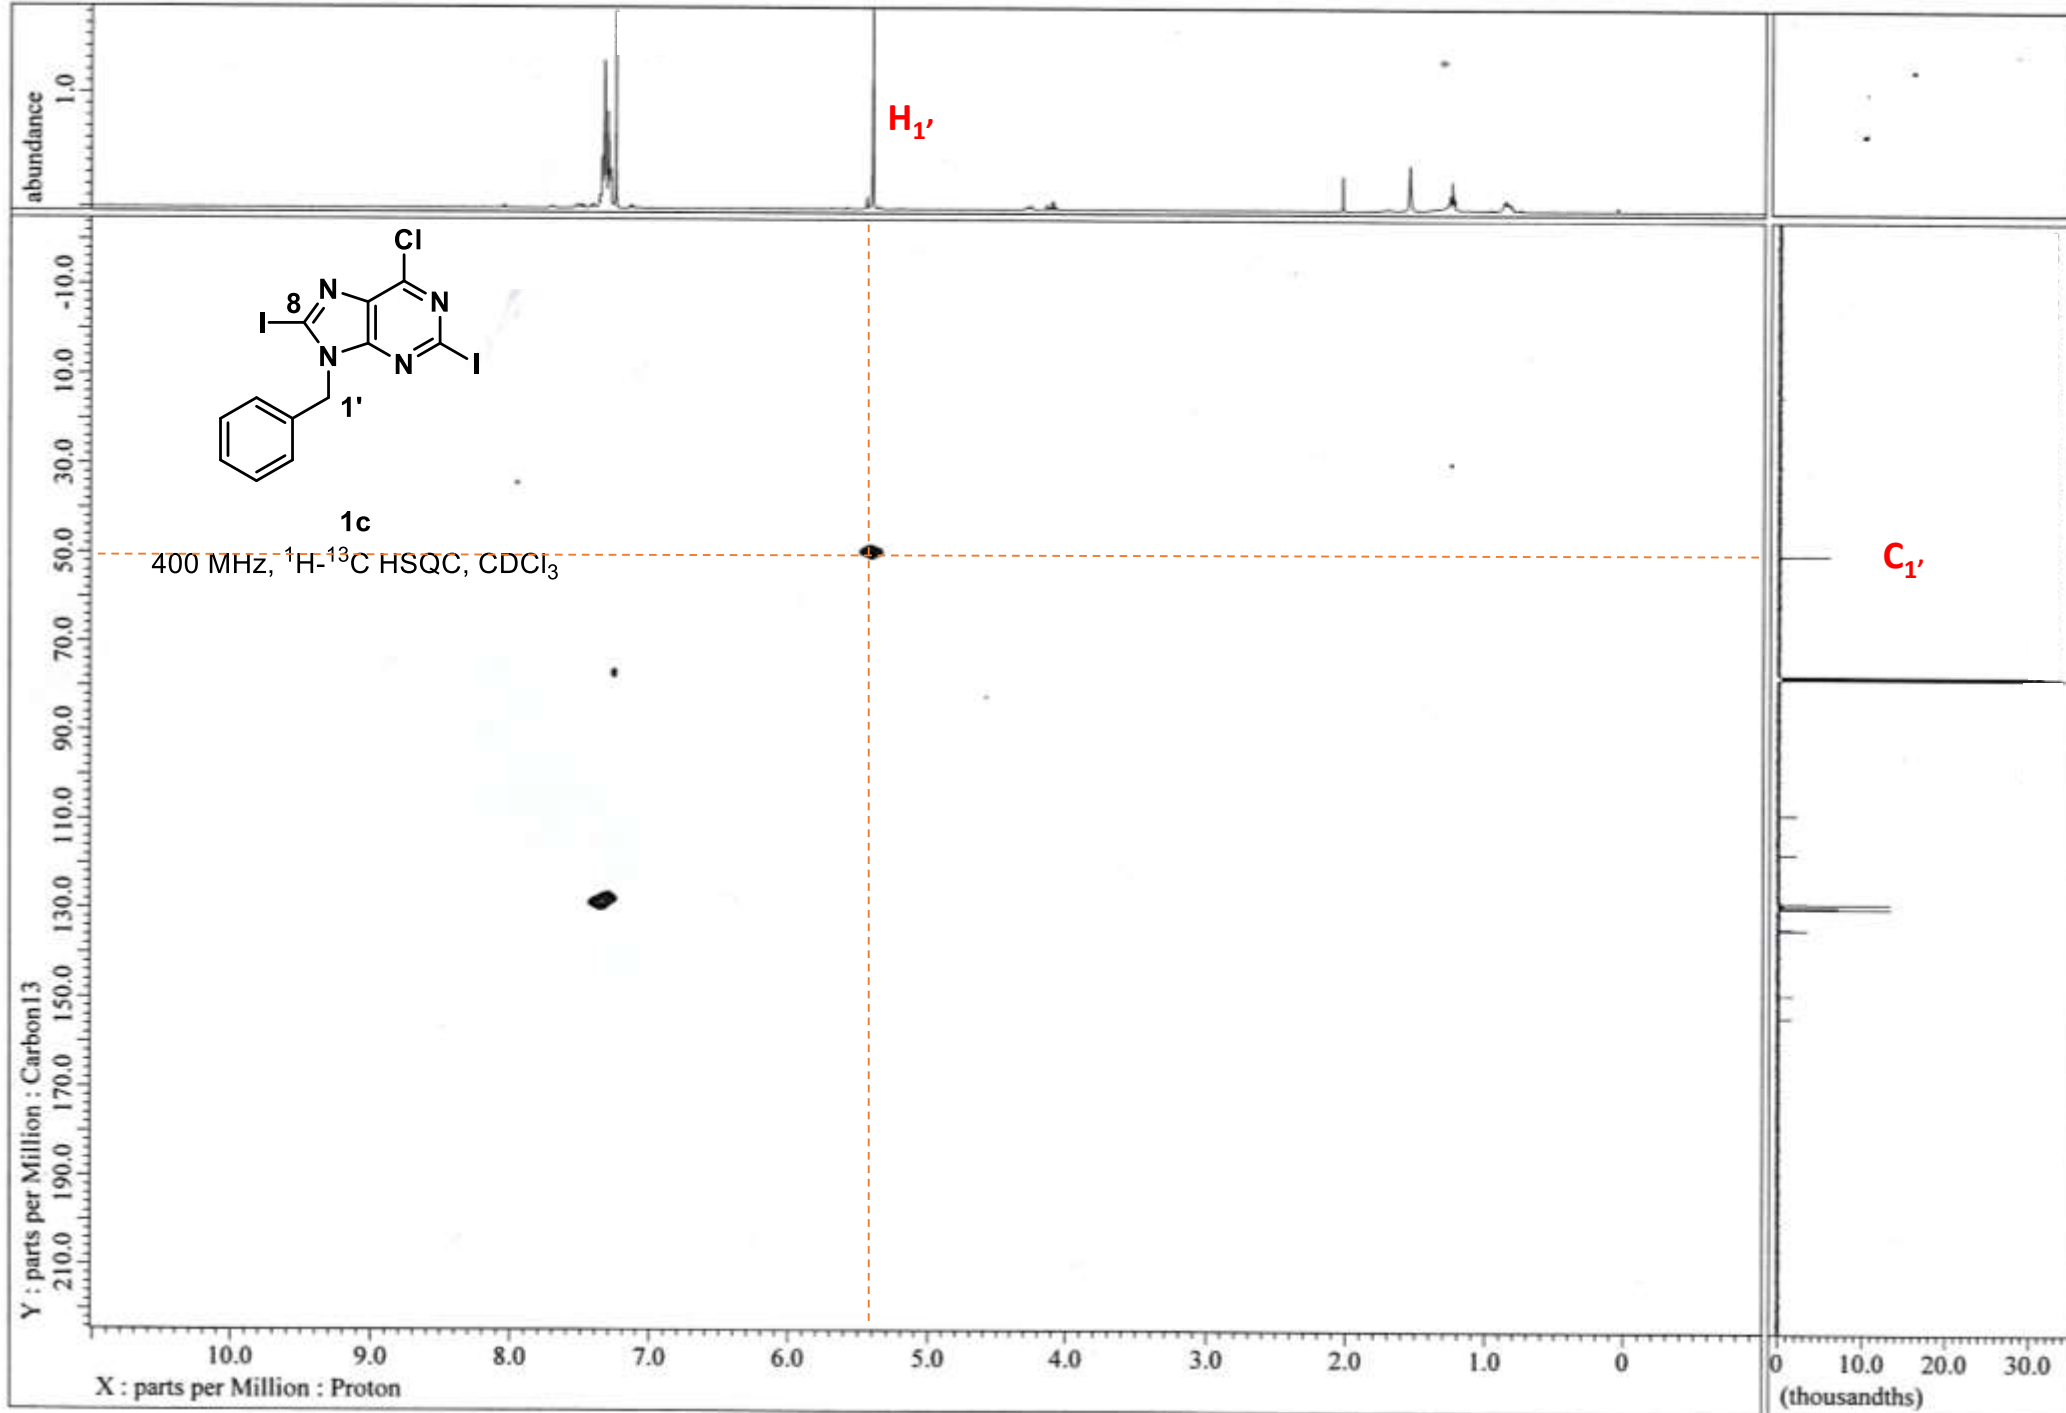



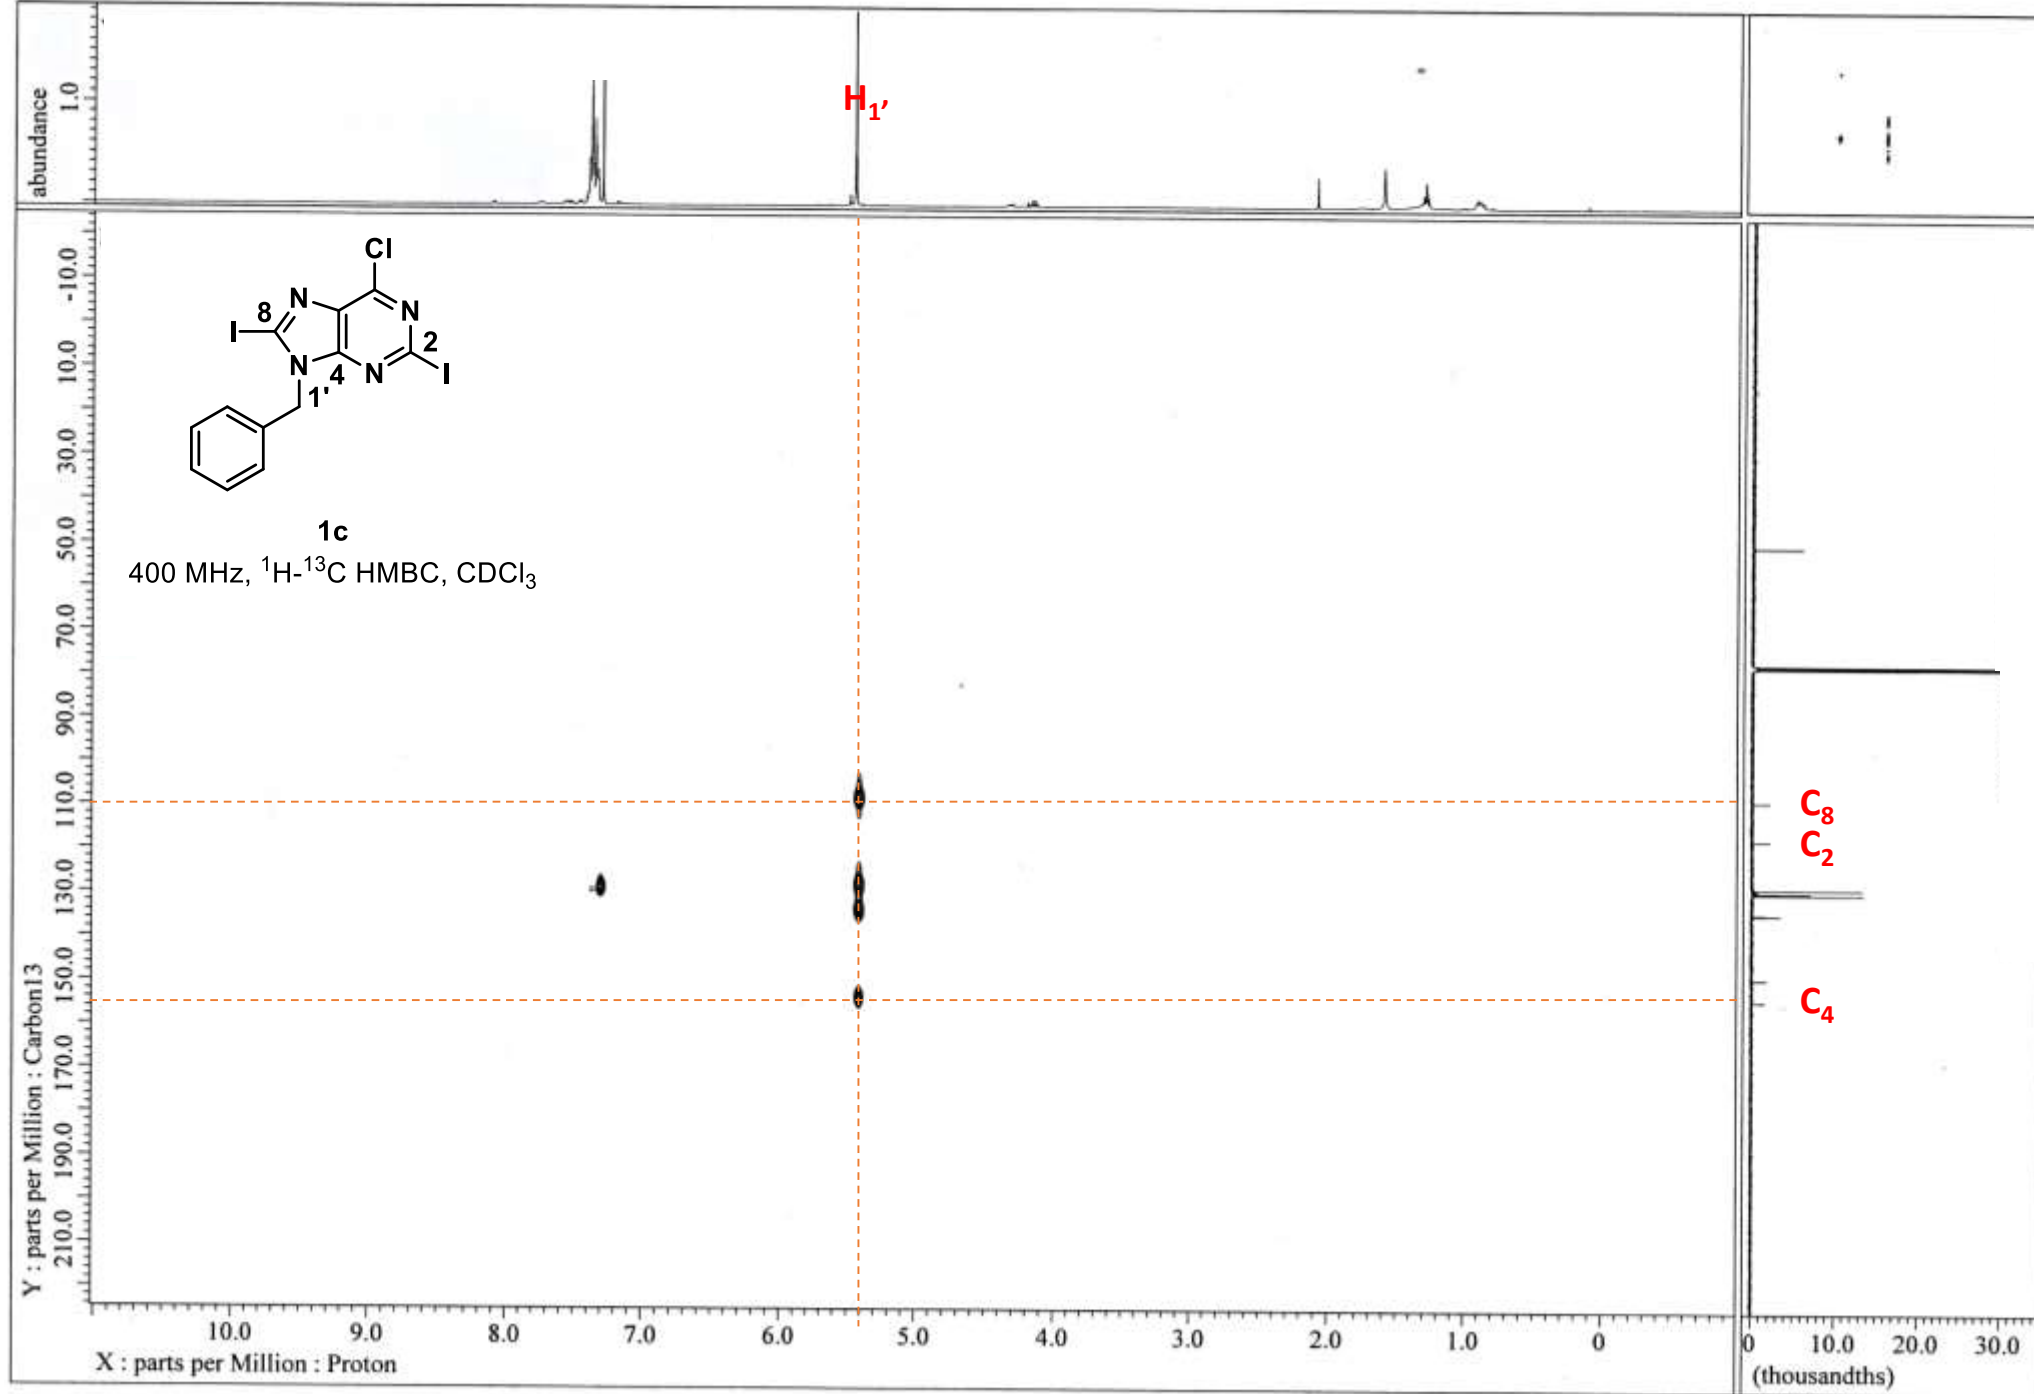

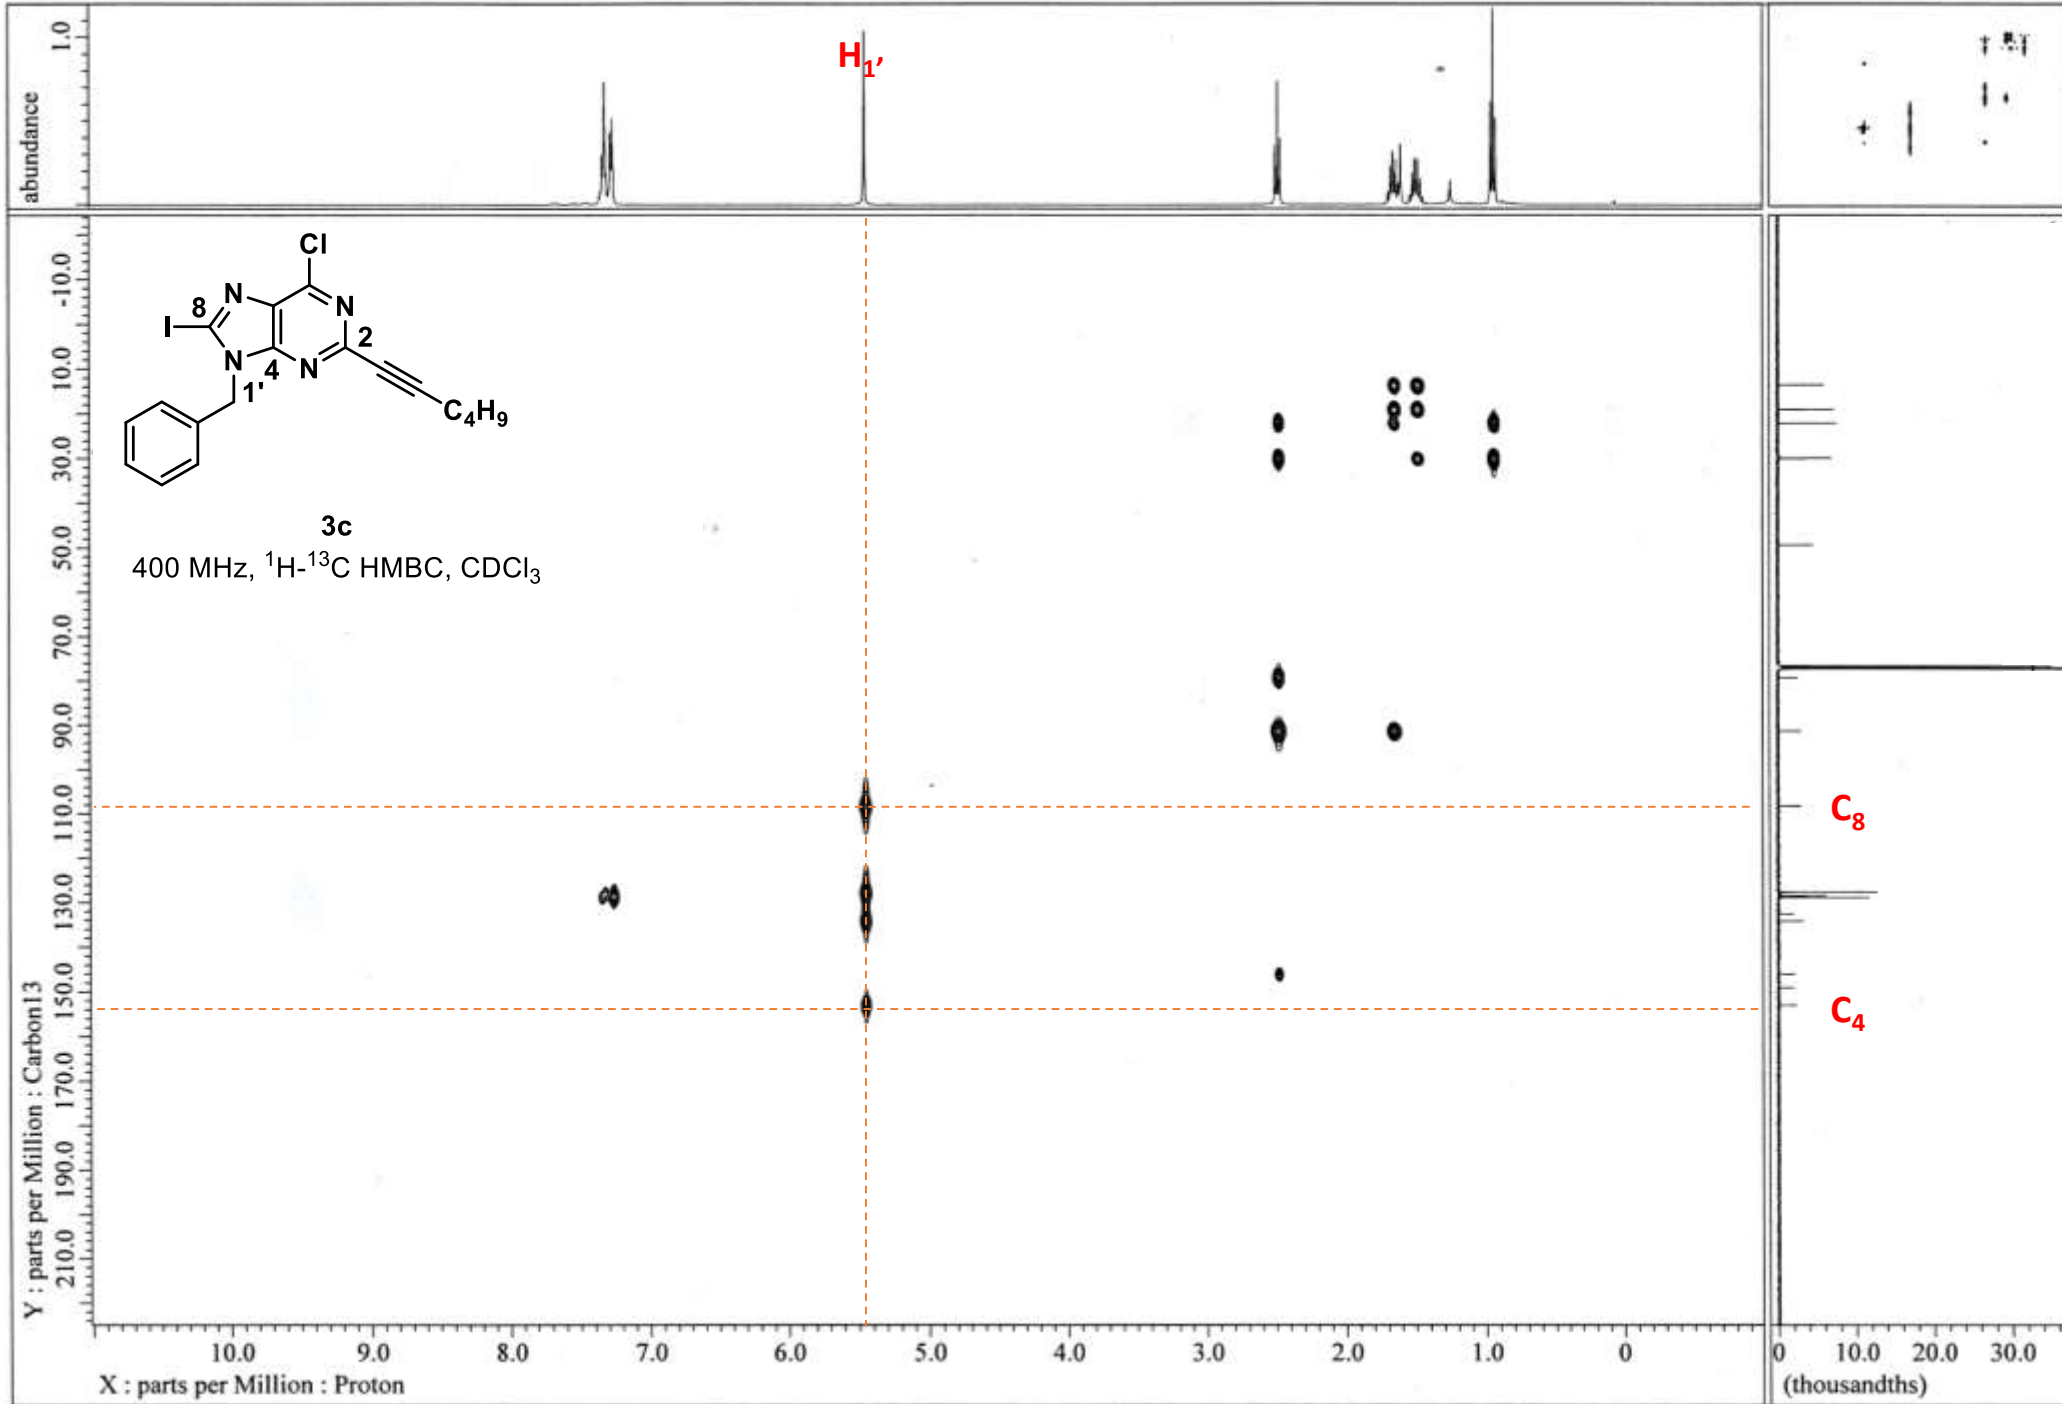

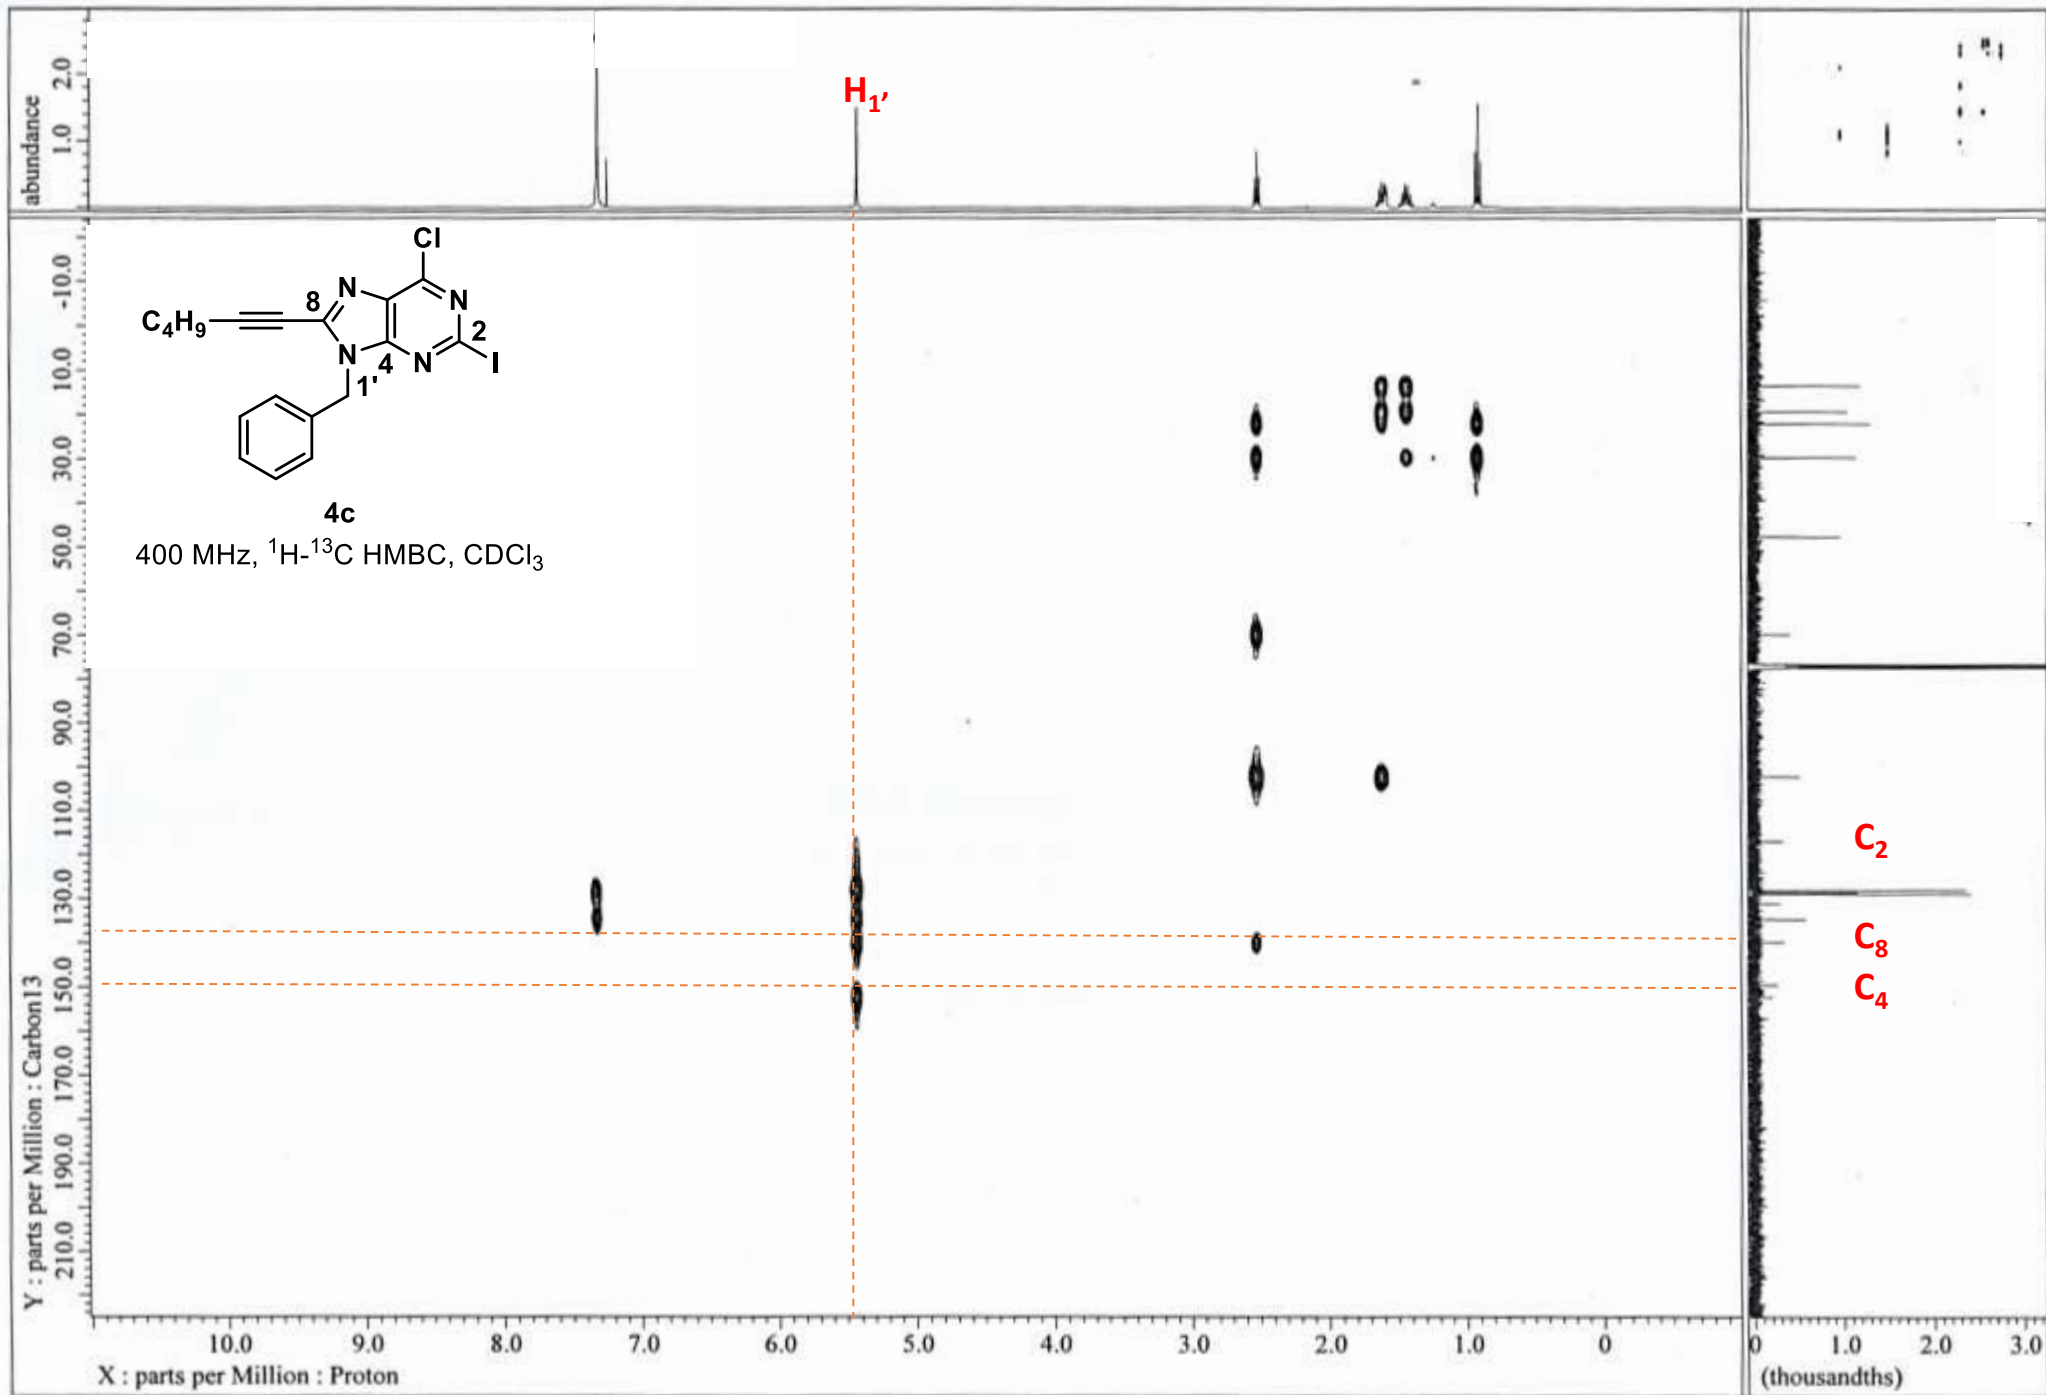

Supplement: d2qo00823h1.pdf [file d2qo00823h1.pdf]
